# Supplementary material for: Interrogating COVID-19 vaccine intent in the Philippines with a nationwide open-access online survey
Source: PeerJ journal article supplement (doi:10.7717/peerj.12887), 2022-02-16
Supplement: CAPLE-SurveyCodebook.pdf [file CAPLE-SurveyCodebook.pdf]

## Interrogating COVID-19 Vaccine Hesitancy in the Philippines with a Nationwide Open-Access Online Survey Nominal Data Codebook

---

- Sex\_recoded
  - 1 = Male
  - 2 = Female
  
- Martial\_Status\_recoded\_Q51
  - 1 = Single
  - 2 = Married
  
- Education\_recoded\_Q52
  - 1 = Elementary School or Below
  - 2 = Junior High School
  - 3 = Senior High School
  - 4 = College/University or Above
  
- Occupation\_recoded\_Q53
  - 1 = Blue Collar Worker
  - 2 = Professional/White Collar Worker
  - 3 = Self-employed
  - 4 = Student
  - 5 = Housewife/Retired/Unemployed/Other
  
- Income\_recoded\_Q106
  - 1 = PHP 10,000 or less
  - 2 = PHP 10,000 to 20,000
  - 3 = PHP 20,000 to 100,000
  - 4 = PHP 100,000 or more
  
- AreaRural\_Urban\_recoded\_Q54
  - 1 = Rural
  - 2 = Urban
  
- Live\_in\_QuezonCity\_recoded\_Q56
  - 1 = Yes
  - 2 = No
  
- Test\_Pos\_COVID\_Q57
  - 1 = Yes
  - 2 = No

- Know\_Someone\_Test\_Pos\_COVID\_Q58
  - 1 = Yes
  - 2 = No
  
- Chronic\_Condition\_Q59
  - 1 = Yes
  - 2 = No
  
- Overall\_Health\_Q60
  - 1 = Very Poor
  - 2 = Poor
  - 3 = Fair
  - 4 = Good
  - 5 = Very Good
  
- Preference\_Where\_Vax\_Made\_Q66
  - 1 = do not have a preference. I will use any safe and effective vaccine.
  - 2 = I prefer a vaccine made in China.
  - 3 = I prefer a vaccine made in Russia.
  - 4 = I prefer a vaccine made in the USA or Europe.
  
- Would\_Use\_Fetal\_Cell\_COVID\_Vax\_Q65
  - 1 = Definitely NO
  - 2 = Probably No
  - 3 = Unsure
  - 4 = Probably Yes
  - 5 = Definitely Yes
  - 6 = Siguradong Yes
  
- WTP\_Recode
  - 1 = PHP 500–1000
  - 2 = PHP 1500–2500
  - 3 = PHP 3000–4000
