# Supplementary material for: Interrogating COVID-19 vaccine intent in the Philippines with a nationwide open-access online survey
Source: PeerJ. 2022 Feb 16;10:e12887. doi: 10.7717/peerj.12887 (PMC8857903; doi:10.7717/peerj.12887)
Supplement: Supplemental Information 1 [file peerj-10-12887-s001.xlsx]

## Sheet: CAPLE_PeerJManuscriptVaccineHes
Age_Q49	AgeGroups	Sex	Sex_recoded_Q50	Marital_Status	Marital_Status_recoded_Q51	Education	Education_recoded_Q52	Occupation	Occupation_recoded_Q53	Income	Income_recoded_Q106	AreaRural_Urban	AreaRural_Urban_recoded_Q54	Philippines_Region_Q55	Live_in_QuezonCity	Live_in_QuezonCity_recoded_Q56	Test_Pos_COVID_Q57	Know_Someone_Test_Pos_COVID_Q58	Chronic_Condition_Q59	Overall_Health_Q60	Overall_Health_Groups	Would_Use_COVID_Vax_Q61	Would_Use_COVID_Vax_Groups	Confident_COVID_Vax_madeinChina_Q62	ConCOVIDVax_madeChina_groups	Confident_COVID_Vax_madeinRussia_Q62_A	ConfCOVIDVax_madeRussia_groups	Confident_COVID_Vax_madeinUSA_Europe_Q63	ConfCOVIDVax_madeEuropeorUSA_groups	Preference_Where_Vax_Made_Q66	Would_Use_Fetal_Cell_COVID_Vax_Q65	HighChance_Getting_COVID_NxtFewMonths	HighChance_Getting_COVID_NxtFewMonths_recoded_Q69	HighChanceGettingCOVID_Groups	Worried_Likelihood_Getting_COVID_Q71	Worried_Likelihood_COVID_Groups	Worried_FamilyLikelihood_Getting_COVID_Q72	COVID_is_Serious_Q73	COVID_is_Serious_Groups	Very_Sick_if_get_COVID_Q74	Very_Sick_if_get_COVID_Groups	Afraid_Getting_COVID_Q75	Afraid_Getting_COVID_Groups	Afraid_Family_Getting_COVID_Q76	Vax_Decrease_COVID_Chance_Q82	Vax_Decrease_COVID_Chance_Groups	Vax_Decrease_Worries_Getting_COVID_Q91	Vax_Decrease_Worries_Getting_COVID_Groups	Worry_COVID_Vax_SideEffects_Q92
24	1	Female	2	Single	1	Elementary School or Below	1	Professional/White Collar Worker	2	PHP 10,000 or less	1	Rural	1	Region VI	No	2	2	2	2	5	3	2	1	2	1	2	1	2	1	1	3	Disagree	2	1	4	2	4	4	2	4	2	4	2	4	3	2	2	1	4
18	1	Female	2	Single	1	Junior High School	2	Student	4	PHP 10,000 or less	1	Urban	2	Region VII	No	2	2	2	2	4	2	2	1	2	1	2	1	2	1	1	1	Strongly Disagree	1	1	3	2	4	2	1	3	2	3	2	4	2	1	3	2	4
18	1	Male	1	Single	1	Junior High School	2	Student	4	PHP 10,000 or less	1	Urban	2	Region III	No	2	2	2	2	4	2	3	1	2	1	3	2	4	2	1	1	Disagree	2	1	4	2	3	4	2	4	2	4	2	4	2	1	3	2	4
18	1	Male	1	Single	1	Junior High School	2	Student	4	PHP 10,000 or less	1	Rural	1	Region III	No	2	2	2	2	4	2	3	1	1	1	2	1	2	1	1	1	Disagree	2	1	2	1	3	3	2	2	1	2	1	2	2	1	2	1	3
29	1	Female	2	Married	2	Junior High School	2	Professional/White Collar Worker	2	PHP 10,000 or less	1	Urban	2	Region VI	No	2	2	1	2	4	2	4	2	2	1	2	1	3	2	1	3	Disagree	2	1	2	1	3	3	2	2	1	3	2	3	2	1	3	2	3
18	1	Male	1	Single	1	Junior High School	2	Student	4	PHP 10,000 or less	1	Rural	1	Region IV-A	No	2	2	1	2	4	2	3	1	2	1	3	2	3	2	4	2	Agree	3	2	3	2	4	4	2	2	1	4	2	4	3	2	2	1	4
18	1	Male	1	Single	1	Junior High School	2	Student	4	PHP 10,000 or less	1	Rural	1	Region III	No	2	2	2	2	4	2	4	2	2	1	3	2	3	2	1	2	Strongly Disagree	1	1	2	1	3	3	2	3	2	3	2	3	4	2	3	2	3
18	1	Male	1	Single	1	Junior High School	2	Student	4	PHP 10,000 or less	1	Rural	1	Region III	No	2	2	1	2	3	1	3	1	1	1	3	2	3	2	4	1	Disagree	2	1	2	1	3	4	2	2	1	3	2	4	3	2	2	1	4
18	1	Male	1	Single	1	Junior High School	2	Student	4	PHP 10,000 or less	1	Urban	2	Region IV-A	No	2	2	2	2	4	2	3	1	1	1	3	2	3	2	4	2	Strongly Disagree	1	1	3	2	4	3	2	3	2	4	2	4	3	2	2	1	4
18	1	Male	1	Single	1	Junior High School	2	Student	4	PHP 10,000 or less	1	Rural	1	Region II	No	2	2	2	2	3	1	3	1	2	1	2	1	3	2	4	1	Disagree	2	1	4	2	4	4	2	3	2	4	2	4	3	2	3	2	4
18	1	Female	2	Single	1	Junior High School	2	Student	4	PHP 10,000 or less	1	Rural	1	Region III	No	2	2	1	2	4	2	4	2	2	1	2	1	3	2	1	3	Disagree	2	1	4	2	4	3	2	3	2	4	2	4	3	2	3	2	4
18	1	Female	2	Single	1	Junior High School	2	Student	4	PHP 20,000 to 100,000	3	Urban	2	NCR	Yes	1	2	2	2	4	2	5	2	2	1	3	2	3	2	1	2	Disagree	2	1	3	2	3	4	2	4	2	4	2	4	4	2	3	2	4
52	4	Female	2	Married	2	Junior High School	2	Professional/White Collar Worker	2	PHP 20,000 to 100,000	3	Urban	2	NCR	No	2	2	2	2	3	1	3	1	2	1	2	1	2	1	4	1	Agree	3	2	3	2	4	4	2	3	2	3	2	4	3	2	3	2	3
21	1	Male	1	Single	1	Senior High School	3	Student	4	PHP 20,000 to 100,000	3	Rural	1	Region III	No	2	2	1	2	4	2	5	2	2	1	2	1	3	2	4	4	Disagree	2	1	4	2	4	4	2	3	2	4	2	3	4	2	4	2	2
20	1	Male	1	Single	1	Senior High School	3	Student	4	PHP 10,000 or less	1	Urban	2	NCR	Yes	1	2	1	1	3	1	5	2	2	1	2	1	4	2	4	5	Strongly Disagree	1	1	4	2	4	4	2	4	2	4	2	4	3	2	4	2	1
21	1	Female	2	Single	1	Senior High School	3	Student	4	PHP 10,000 to 20,000	2	Urban	2	Region IV-A	No	2	2	1	2	4	2	4	2	2	1	3	2	3	2	1	3	Agree	3	2	3	2	4	3	2	3	2	3	2	4	3	2	3	2	2
20	1	Female	2	Single	1	Senior High School	3	Student	4	PHP 10,000 or less	1	Rural	1	Region IV-A	No	2	2	1	2	4	2	4	2	1	1	2	1	3	2	4	3	Disagree	2	1	2	1	3	3	2	3	2	3	2	3	4	2	4	2	3
21	1	Female	2	Single	1	Senior High School	3	Student	4	PHP 10,000 or less	1	Rural	1	Region IV-A	No	2	2	2	2	3	1	4	2	1	1	2	1	4	2	4	5	Strongly Disagree	1	1	4	2	4	4	2	4	2	4	2	4	3	2	4	2	3
18	1	Female	2	Single	1	Senior High School	3	Student	4	PHP 10,000 or less	1	Rural	1	Region IV-A	No	2	2	1	2	4	2	5	2	1	1	3	2	3	2	4	4	Agree	3	2	4	2	4	4	2	4	2	4	2	4	4	2	2	1	3
19	1	Female	2	Single	1	Senior High School	3	Student	4	PHP 10,000 or less	1	Urban	2	NCR	No	2	2	1	2	5	3	5	2	1	1	1	1	4	2	4	3	Strongly Disagree	1	1	3	2	4	4	2	2	1	4	2	4	4	2	4	2	3
18	1	Female	2	Single	1	Senior High School	3	Student	4	PHP 10,000 or less	1	Rural	1	Region IV-A	No	2	2	1	2	4	2	5	2	2	1	3	2	4	2	1	3	Disagree	2	1	3	2	4	4	2	3	2	4	2	4	4	2	4	2	3
18	1	Female	2	Single	1	Senior High School	3	Student	4	PHP 10,000 or less	1	Urban	2	Region VII	No	2	2	1	2	4	2	5	2	2	1	2	1	3	2	4	4	Disagree	2	1	3	2	3	4	2	3	2	3	2	4	3	2	3	2	3
19	1	Male	1	Single	1	Senior High School	3	Student	4	PHP 10,000 or less	1	Urban	2	NCR	No	2	2	1	2	4	2	5	2	2	1	3	2	3	2	4	4	Strongly Disagree	1	1	3	2	4	3	2	3	2	3	2	3	4	2	3	2	3
20	1	Female	2	Single	1	Senior High School	3	Student	4	PHP 100,000 or more	4	Urban	2	NCR	No	2	2	2	2	4	2	5	2	1	1	3	2	3	2	1	3	Strongly Disagree	1	1	3	2	3	4	2	3	2	4	2	4	3	2	4	2	3
19	1	Male	1	Single	1	Senior High School	3	Student	4	PHP 10,000 or less	1	Urban	2	NCR	No	2	2	1	2	5	3	3	1	2	1	3	2	2	1	1	1	Disagree	2	1	3	2	4	4	2	1	1	3	2	4	2	1	2	1	4
18	1	Male	1	Single	1	Senior High School	3	Student	4	PHP 10,000 to 20,000	2	Urban	2	NCR	No	2	2	2	2	4	2	2	1	2	1	3	2	3	2	1	3	Agree	3	2	2	1	2	2	1	3	2	2	1	2	3	2	2	1	4
19	1	Female	2	Single	1	Senior High School	3	Student	4	PHP 10,000 or less	1	Urban	2	NCR	Yes	1	2	1	2	5	3	4	2	2	1	3	2	3	2	4	3	Disagree	2	1	3	2	4	4	2	3	2	4	2	4	3	2	2	1	4
20	1	Female	2	Single	1	Senior High School	3	Student	4	PHP 20,000 to 100,000	3	Urban	2	NCR	No	2	2	1	2	4	2	4	2	2	1	2	1	3	2	4	3	Disagree	2	1	3	2	4	3	2	2	1	3	2	4	3	2	3	2	4
21	1	Male	1	Single	1	Senior High School	3	Student	4	PHP 10,000 or less	1	Rural	1	Region III	No	2	2	1	2	4	2	4	2	1	1	1	1	3	2	1	3	Agree	3	2	3	2	3	3	2	2	1	3	2	3	3	2	4	2	3
18	1	Male	1	Single	1	Senior High School	3	Student	4	PHP 10,000 or less	1	Urban	2	Region IV-A	No	2	2	1	2	4	2	3	1	1	1	1	1	3	2	4	2	Strongly Disagree	1	1	3	2	3	3	2	3	2	3	2	3	3	2	3	2	4
20	1	Male	1	Single	1	Senior High School	3	Student	4	PHP 10,000 or less	1	Urban	2	NCR	No	2	2	2	2	5	3	5	2	2	1	2	1	1	1	1	4	Strongly Disagree	1	1	4	2	4	4	2	4	2	4	2	4	3	2	3	2	4
19	1	Male	1	Single	1	Senior High School	3	Student	4	PHP 20,000 to 100,000	3	Rural	1	Region II	No	2	2	2	2	4	2	5	2	3	2	3	2	3	2	1	3	Agree	3	2	3	2	3	3	2	4	2	4	2	3	3	2	4	2	3
19	1	Male	1	Single	1	Senior High School	3	Student	4	PHP 10,000 or less	1	Rural	1	Region III	No	2	2	2	2	4	2	4	2	2	1	2	1	3	2	4	2	Disagree	2	1	3	2	3	3	2	2	1	2	1	3	2	1	3	2	2
21	1	Male	1	Single	1	Senior High School	3	Student	4	PHP 10,000 or less	1	Rural	1	Region II	No	2	2	1	2	4	2	4	2	2	1	3	2	3	2	4	4	Agree	3	2	3	2	4	4	2	4	2	4	2	4	3	2	3	2	4
20	1	Male	1	Single	1	Senior High School	3	Student	4	PHP 20,000 to 100,000	3	Urban	2	Region IX	No	2	2	1	2	4	2	4	2	3	2	2	1	2	1	2	4	Disagree	2	1	3	2	4	3	2	2	1	3	2	4	4	2	4	2	3
21	1	Male	1	Single	1	Senior High School	3	Student	4	PHP 10,000 or less	1	Rural	1	Region IV-A	No	2	2	2	2	4	2	4	2	2	1	4	2	3	2	3	2	Disagree	2	1	2	1	4	4	2	2	1	3	2	4	2	1	3	2	4
21	1	Female	2	Single	1	Senior High School	3	Student	4	PHP 10,000 or less	1	Urban	2	NCR	No	2	2	1	2	4	2	4	2	1	1	2	1	3	2	4	1	Strongly Disagree	1	1	2	1	2	3	2	3	2	4	2	2	3	2	3	2	4
20	1	Male	1	Single	1	Senior High School	3	Student	4	PHP 10,000 or less	1	Urban	2	Region IV-A	No	2	2	1	2	4	2	4	2	3	2	3	2	3	2	1	3	Disagree	2	1	4	2	4	4	2	4	2	4	2	4	4	2	4	2	2
20	1	Male	1	Single	1	Senior High School	3	Student	4	PHP 10,000 or less	1	Urban	2	Region VIII	No	2	2	1	2	5	3	4	2	2	1	2	1	4	2	4	3	Disagree	2	1	3	2	3	3	2	1	1	2	1	3	3	2	2	1	3
21	1	Female	2	Single	1	Senior High School	3	Student	4	PHP 10,000 or less	1	Urban	2	Region XIII	No	2	2	2	2	4	2	5	2	2	1	2	1	2	1	1	3	Strongly Disagree	1	1	2	1	4	4	2	4	2	4	2	4	4	2	3	2	3
46	3	Male	1	Married	2	Senior High School	3	Blue Collar Worker	1	PHP 10,000 to 20,000	2	Urban	2	NCR	Yes	1	2	1	2	5	3	2	1	1	1	2	1	3	2	4	1	Strongly Disagree	1	1	4	2	3	2	1	2	1	3	2	3	1	1	1	1	4
19	1	Female	2	Single	1	Senior High School	3	Student	4	PHP 10,000 or less	1	Urban	2	NCR	No	2	2	1	2	3	1	3	1	2	1	2	1	2	1	1	3	Agree	3	2	3	2	3	4	2	4	2	4	2	3	2	1	2	1	3
20	1	Female	2	Single	1	Senior High School	3	Student	4	PHP 10,000 or less	1	Urban	2	NCR	No	2	2	1	2	3	1	2	1	2	1	2	1	2	1	1	2	Disagree	2	1	3	2	4	4	2	3	2	2	1	3	3	2	3	2	4
21	1	Female	2	Single	1	Senior High School	3	Student	4	PHP 10,000 to 20,000	2	Urban	2	Region IV-A	No	2	2	1	2	5	3	4	2	1	1	1	1	3	2	4	3	Disagree	2	1	3	2	4	4	2	2	1	4	2	4	3	2	3	2	2
21	1	Female	2	Single	1	Senior High School	3	Student	4	PHP 100,000 or more	4	Urban	2	NCR	Yes	1	2	2	2	5	3	3	1	1	1	1	1	2	1	4	2	Disagree	2	1	2	1	2	4	2	3	2	3	2	3	3	2	2	1	4
21	1	Female	2	Single	1	Senior High School	3	Student	4	PHP 10,000 or less	1	Urban	2	NCR	No	2	2	1	2	4	2	4	2	2	1	2	1	3	2	4	3	Strongly Disagree	1	1	3	2	3	4	2	4	2	4	2	4	3	2	2	1	4
20	1	Female	2	Single	1	Senior High School	3	Student	4	PHP 10,000 to 20,000	2	Rural	1	Region IV-A	No	2	2	2	2	4	2	4	2	2	1	2	1	2	1	1	4	Disagree	2	1	3	2	3	3	2	3	2	3	2	3	3	2	2	1	3
19	1	Female	2	Single	1	Senior High School	3	Student	4	PHP 10,000 or less	1	Urban	2	NCR	No	2	2	2	2	5	3	4	2	2	1	2	1	2	1	1	3	Disagree	2	1	3	2	3	3	2	3	2	3	2	3	3	2	2	1	3
21	1	Female	2	Single	1	Senior High School	3	Student	4	PHP 10,000 or less	1	Urban	2	NCR	No	2	2	2	2	5	3	3	1	2	1	2	1	2	1	4	3	Strongly Disagree	1	1	1	1	4	4	2	4	2	1	1	4	3	2	3	2	4
20	1	Female	2	Single	1	Senior High School	3	Student	4	PHP 20,000 to 100,000	3	Urban	2	Region IV-A	No	2	2	1	2	5	3	5	2	2	1	2	1	3	2	1	5	Disagree	2	1	2	1	2	4	2	3	2	3	2	3	3	2	3	2	3
20	1	Female	2	Single	1	Senior High School	3	Student	4	PHP 10,000 or less	1	Rural	1	Region I	No	2	2	1	2	3	1	4	2	2	1	2	1	3	2	4	1	Disagree	2	1	3	2	4	4	2	3	2	3	2	3	3	2	3	2	3
18	1	Female	2	Single	1	Senior High School	3	Student	4	PHP 20,000 to 100,000	3	Urban	2	NCR	No	2	2	1	2	3	1	3	1	2	1	2	1	3	2	4	3	Disagree	2	1	3	2	4	4	2	4	2	4	2	4	3	2	3	2	4
18	1	Male	1	Single	1	Senior High School	3	Student	4	PHP 10,000 or less	1	Rural	1	Region III	No	2	2	1	2	4	2	4	2	3	2	3	2	3	2	1	1	Disagree	2	1	4	2	4	4	2	4	2	4	2	4	4	2	4	2	4
21	1	Female	2	Single	1	Senior High School	3	Student	4	PHP 10,000 or less	1	Rural	1	Region III	No	2	2	1	2	4	2	4	2	1	1	3	2	3	2	1	4	Disagree	2	1	3	2	4	4	2	3	2	3	2	4	4	2	4	2	3
20	1	Female	2	Single	1	Senior High School	3	Student	4	PHP 10,000 or less	1	Urban	2	NCR	No	2	2	1	2	4	2	4	2	2	1	2	1	2	1	1	3	Disagree	2	1	3	2	3	4	2	3	2	4	2	4	3	2	3	2	4
21	1	Female	2	Single	1	Senior High School	3	Student	4	PHP 10,000 or less	1	Rural	1	Region IV-A	No	2	2	2	2	4	2	3	1	2	1	3	2	3	2	1	2	Strongly Disagree	1	1	4	2	4	4	2	3	2	4	2	4	3	2	3	2	4
19	1	Male	1	Single	1	Senior High School	3	Student	4	PHP 10,000 or less	1	Urban	2	Region III	No	2	2	2	2	4	2	4	2	1	1	1	1	3	2	1	3	Strongly Disagree	1	1	3	2	3	4	2	4	2	4	2	4	4	2	4	2	4
20	1	Female	2	Single	1	Senior High School	3	Student	4	PHP 10,000 or less	1	Urban	2	NCR	Yes	1	2	2	2	4	2	5	2	2	1	3	2	4	2	4	3	Disagree	2	1	4	2	4	4	2	3	2	4	2	4	3	2	4	2	4
23	1	Female	2	Single	1	Senior High School	3	Student	4	PHP 10,000 to 20,000	2	Urban	2	NCR	No	2	2	2	2	4	2	3	1	1	1	2	1	3	2	4	3	Disagree	2	1	4	2	4	4	2	4	2	4	2	4	3	2	3	2	3
19	1	Male	1	Single	1	Senior High School	3	Student	4	PHP 10,000 or less	1	Rural	1	Region IV-A	No	2	2	1	2	3	1	4	2	1	1	2	1	3	2	1	3	Agree	3	2	3	2	3	3	2	3	2	3	2	3	3	2	3	2	3
20	1	Female	2	Single	1	Senior High School	3	Student	4	PHP 10,000 or less	1	Rural	1	Region VIII	No	2	2	1	2	3	1	3	1	2	1	3	2	4	2	1	3	Strongly Agree	4	2	3	2	4	4	2	3	2	3	2	4	4	2	3	2	3
21	1	Female	2	Single	1	Senior High School	3	Student	4	PHP 10,000 or less	1	Rural	1	Region VIII	No	2	2	1	2	5	3	4	2	2	1	3	2	3	2	1	3	Agree	3	2	4	2	4	4	2	3	2	4	2	4	3	2	3	2	4
20	1	Female	2	Single	1	Senior High School	3	Student	4	PHP 10,000 or less	1	Rural	1	Region VI	No	2	2	1	2	4	2	5	2	1	1	3	2	3	2	1	3	Strongly Disagree	1	1	1	1	3	4	2	2	1	4	2	4	4	2	4	2	2
21	1	Male	1	Single	1	Senior High School	3	Student	4	PHP 20,000 to 100,000	3	Urban	2	NCR	No	2	2	1	2	3	1	4	2	3	2	3	2	3	2	1	3	Disagree	2	1	4	2	4	3	2	3	2	4	2	4	3	2	3	2	2
19	1	Female	2	Single	1	Senior High School	3	Student	4	PHP 10,000 or less	1	Urban	2	NCR	No	2	2	1	2	5	3	5	2	3	2	3	2	3	2	1	3	Strongly Disagree	1	1	3	2	3	4	2	1	1	4	2	4	4	2	4	2	3
21	1	Male	1	Single	1	Senior High School	3	Student	4	PHP 10,000 or less	1	Urban	2	NCR	No	2	2	2	2	4	2	5	2	1	1	1	1	3	2	1	3	Agree	3	2	4	2	4	2	1	3	2	3	2	4	4	2	4	2	3
21	1	Female	2	Single	1	Senior High School	3	Student	4	PHP 10,000 or less	1	Urban	2	NCR	No	2	2	1	2	5	3	5	2	2	1	3	2	4	2	1	1	Strongly Disagree	1	1	2	1	3	4	2	4	2	3	2	4	4	2	4	2	3
20	1	Male	1	Single	1	Senior High School	3	Student	4	PHP 10,000 or less	1	Urban	2	Region IV-A	No	2	2	1	2	3	1	4	2	1	1	1	1	3	2	1	2	Agree	3	2	3	2	3	4	2	3	2	3	2	3	3	2	3	2	3
18	1	Female	2	Single	1	Senior High School	3	Student	4	PHP 10,000 to 20,000	2	Rural	1	Region III	No	2	2	2	2	4	2	4	2	2	1	3	2	3	2	1	3	Disagree	2	1	4	2	4	3	2	3	2	4	2	4	3	2	4	2	2
19	1	Female	2	Single	1	Senior High School	3	Student	4	PHP 10,000 or less	1	Urban	2	Region IV-A	No	2	2	1	2	5	3	5	2	2	1	3	2	3	2	1	4	Strongly Disagree	1	1	4	2	4	4	2	4	2	4	2	4	3	2	3	2	2
21	1	Male	1	Single	1	Senior High School	3	Student	4	PHP 10,000 or less	1	Urban	2	NCR	Yes	1	2	1	2	5	3	4	2	1	1	1	1	4	2	4	4	Disagree	2	1	4	2	4	4	2	4	2	4	2	4	4	2	4	2	2
20	1	Female	2	Single	1	Senior High School	3	Student	4	PHP 10,000 or less	1	Urban	2	Region III	No	2	2	1	2	4	2	5	2	3	2	3	2	3	2	1	3	Disagree	2	1	4	2	4	2	1	2	1	4	2	4	4	2	4	2	2
19	1	Male	1	Single	1	Senior High School	3	Student	4	PHP 20,000 to 100,000	3	Urban	2	Region IV-A	No	2	2	1	2	5	3	3	1	1	1	2	1	3	2	1	1	Strongly Disagree	1	1	3	2	3	4	2	3	2	4	2	4	3	2	3	2	3
20	1	Female	2	Single	1	Senior High School	3	Student	4	PHP 10,000 to 20,000	2	Rural	1	Region IV-B	No	2	2	1	2	3	1	4	2	1	1	3	2	3	2	1	5	Agree	3	2	2	1	4	3	2	4	2	1	1	4	4	2	4	2	2
18	1	Male	1	Single	1	Senior High School	3	Student	4	PHP 10,000 or less	1	Urban	2	Region X	No	2	2	1	2	4	2	3	1	1	1	2	1	3	2	4	1	Agree	3	2	4	2	4	4	2	3	2	4	2	3	2	1	2	1	4
18	1	Male	1	Single	1	Senior High School	3	Student	4	PHP 10,000 or less	1	Urban	2	Region III	No	2	2	2	1	3	1	5	2	1	1	4	2	4	2	4	4	Agree	3	2	4	2	4	3	2	4	2	3	2	4	3	2	2	1	4
19	1	Male	1	Single	1	Senior High School	3	Student	4	PHP 10,000 or less	1	Urban	2	NCR	Yes	1	2	1	2	3	1	4	2	2	1	2	1	3	2	1	3	Strongly Disagree	1	1	3	2	4	3	2	2	1	2	1	4	4	2	4	2	3
19	1	Female	2	Single	1	Senior High School	3	Student	4	PHP 10,000 or less	1	Urban	2	NCR	No	2	2	1	2	5	3	3	1	2	1	2	1	2	1	1	5	Strongly Disagree	1	1	1	1	2	4	2	4	2	4	2	4	4	2	4	2	4
20	1	Male	1	Single	1	Senior High School	3	Student	4	PHP 10,000 or less	1	Rural	1	Region VI	No	2	2	2	2	3	1	5	2	1	1	2	1	3	2	1	4	Disagree	2	1	4	2	4	4	2	3	2	4	2	4	4	2	4	2	3
18	1	Female	2	Single	1	Senior High School	3	Student	4	PHP 10,000 or less	1	Rural	1	Region III	No	2	2	2	2	4	2	3	1	2	1	3	2	3	2	1	3	Disagree	2	1	3	2	4	4	2	3	2	3	2	4	3	2	3	2	4
22	1	Female	2	Single	1	Senior High School	3	Student	4	PHP 10,000 or less	1	Rural	1	Region III	No	2	2	2	2	4	2	4	2	2	1	3	2	3	2	4	2	Disagree	2	1	3	2	3	4	2	3	2	3	2	3	3	2	3	2	3
21	1	Male	1	Single	1	Senior High School	3	Student	4	PHP 10,000 or less	1	Rural	1	Region III	No	2	1	1	2	4	2	5	2	2	1	2	1	3	2	4	3	Agree	3	2	4	2	4	4	2	3	2	4	2	4	4	2	3	2	4
20	1	Female	2	Single	1	Senior High School	3	Student	4	PHP 10,000 or less	1	Rural	1	Region III	No	2	2	2	2	4	2	4	2	2	1	2	1	3	2	1	1	Agree	3	2	3	2	3	4	2	3	2	4	2	4	4	2	4	2	4
21	1	Female	2	Single	1	Senior High School	3	Student	4	PHP 10,000 or less	1	Rural	1	Region VII	No	2	2	2	2	4	2	4	2	3	2	3	2	3	2	1	3	Agree	3	2	4	2	4	4	2	3	2	4	2	4	3	2	3	2	3
19	1	Male	1	Single	1	Senior High School	3	Student	4	PHP 10,000 to 20,000	2	Urban	2	NCR	No	2	2	1	1	4	2	4	2	1	1	2	1	4	2	4	3	Agree	3	2	4	2	4	4	2	3	2	3	2	3	3	2	3	2	2
21	1	Female	2	Single	1	Senior High School	3	Student	4	PHP 10,000 or less	1	Urban	2	Region VI	No	2	2	2	2	4	2	4	2	2	1	2	1	3	2	1	3	Disagree	2	1	3	2	3	3	2	3	2	3	2	3	3	2	2	1	3
22	1	Female	2	Single	1	Senior High School	3	Student	4	PHP 10,000 or less	1	Urban	2	NCR	No	2	2	1	2	5	3	4	2	3	2	3	2	3	2	4	3	Agree	3	2	3	2	3	4	2	3	2	4	2	4	4	2	4	2	3
19	1	Female	2	Single	1	Senior High School	3	Student	4	PHP 10,000 or less	1	Urban	2	NCR	Yes	1	2	1	2	4	2	5	2	1	1	3	2	4	2	1	1	Strongly Disagree	1	1	4	2	4	3	2	3	2	3	2	4	4	2	4	2	2
31	2	Female	2	Married	2	Senior High School	3	Self-employed	3	PHP 10,000 to 20,000	2	Urban	2	Region VII	No	2	2	2	2	4	2	3	1	3	2	3	2	3	2	1	1	Disagree	2	1	2	1	1	1	1	2	1	1	1	1	3	2	3	2	4
20	1	Female	2	Single	1	Senior High School	3	Student	4	PHP 100,000 or more	4	Urban	2	NCR	No	2	2	2	2	4	2	4	2	3	2	3	2	3	2	1	4	Strongly Disagree	1	1	2	1	2	3	2	3	2	3	2	4	4	2	4	2	3
20	1	Female	2	Married	2	Senior High School	3	Student	4	PHP 10,000 or less	1	Rural	1	Region IV-A	No	2	2	1	2	4	2	3	1	2	1	3	2	3	2	1	3	Disagree	2	1	4	2	4	4	2	3	2	4	2	4	3	2	3	2	3
19	1	Female	2	Single	1	Senior High School	3	Student	4	PHP 10,000 or less	1	Urban	2	NCR	No	2	2	1	2	4	2	4	2	2	1	2	1	3	2	4	3	Disagree	2	1	4	2	4	4	2	3	2	4	2	4	3	2	3	2	3
20	1	Female	2	Single	1	Senior High School	3	Student	4	PHP 10,000 or less	1	Urban	2	NCR	No	2	2	1	2	4	2	4	2	1	1	1	1	3	2	4	1	Disagree	2	1	4	2	4	4	2	2	1	3	2	4	4	2	2	1	4
21	1	Female	2	Single	1	Senior High School	3	Student	4	PHP 10,000 or less	1	Rural	1	Region IV-A	No	2	2	1	2	4	2	3	1	1	1	1	1	3	2	4	3	Disagree	2	1	3	2	3	4	2	2	1	4	2	4	3	2	3	2	2
20	1	Female	2	Single	1	Senior High School	3	Student	4	PHP 10,000 to 20,000	2	Urban	2	NCR	No	2	2	2	2	5	3	5	2	3	2	3	2	3	2	1	3	Strongly Disagree	1	1	3	2	3	4	2	4	2	4	2	4	1	1	2	1	4
20	1	Male	1	Single	1	Senior High School	3	Student	4	PHP 10,000 or less	1	Urban	2	NCR	Yes	1	2	1	2	4	2	4	2	3	2	2	1	3	2	4	4	Disagree	2	1	4	2	4	3	2	2	1	3	2	3	3	2	2	1	4
20	1	Female	2	Single	1	Senior High School	3	Student	4	PHP 10,000 or less	1	Rural	1	Region VIII	No	2	2	1	2	3	1	2	1	1	1	2	1	3	2	1	4	Strongly Disagree	1	1	4	2	4	3	2	4	2	4	2	4	3	2	3	2	4
20	1	Female	2	Single	1	Senior High School	3	Student	4	PHP 10,000 or less	1	Urban	2	NCR	No	2	2	1	2	4	2	4	2	1	1	1	1	4	2	4	2	Disagree	2	1	4	2	4	4	2	3	2	4	2	4	4	2	4	2	3
19	1	Male	1	Single	1	Senior High School	3	Student	4	PHP 10,000 or less	1	Urban	2	Region III	No	2	2	2	2	5	3	3	1	2	1	3	2	3	2	1	4	Disagree	2	1	3	2	4	4	2	3	2	3	2	4	3	2	3	2	4
18	1	Male	1	Single	1	Senior High School	3	Student	4	PHP 10,000 or less	1	Urban	2	NCR	No	2	2	1	2	4	2	3	1	2	1	2	1	2	1	1	3	Disagree	2	1	2	1	3	2	1	2	1	3	2	3	3	2	3	2	3
20	1	Male	1	Single	1	Senior High School	3	Student	4	PHP 10,000 or less	1	Urban	2	NCR	No	2	2	1	2	5	3	5	2	2	1	3	2	4	2	4	3	Strongly Disagree	1	1	3	2	4	4	2	3	2	4	2	4	3	2	4	2	1
22	1	Female	2	Single	1	Senior High School	3	Student	4	PHP 100,000 or more	4	Urban	2	NCR	Yes	1	2	1	2	4	2	4	2	2	1	3	2	4	2	4	4	Disagree	2	1	3	2	3	4	2	3	2	3	2	3	4	2	4	2	2
20	1	Female	2	Single	1	Senior High School	3	Student	4	PHP 10,000 or less	1	Rural	1	Region III	No	2	2	2	2	3	1	4	2	1	1	1	1	3	2	4	2	Disagree	2	1	4	2	4	3	2	3	2	4	2	4	3	2	3	2	3
19	1	Male	1	Single	1	Senior High School	3	Student	4	PHP 10,000 or less	1	Urban	2	Region IV-A	No	2	2	2	2	3	1	3	1	1	1	3	2	3	2	1	1	Disagree	2	1	3	2	3	4	2	3	2	3	2	4	3	2	3	2	4
21	1	Female	2	Single	1	Senior High School	3	Student	4	PHP 10,000 or less	1	Urban	2	NCR	No	2	2	1	2	5	3	5	2	1	1	4	2	4	2	4	3	Agree	3	2	4	2	4	4	2	4	2	4	2	4	4	2	3	2	3
21	1	Male	1	Single	1	Senior High School	3	Student	4	PHP 10,000 or less	1	Urban	2	Region III	No	2	2	1	2	4	2	4	2	3	2	3	2	3	2	1	2	Disagree	2	1	3	2	3	3	2	3	2	3	2	3	4	2	3	2	2
19	1	Male	1	Single	1	Senior High School	3	Student	4	PHP 10,000 or less	1	Rural	1	Region IV-A	No	2	2	1	2	3	1	3	1	2	1	2	1	3	2	4	3	Agree	3	2	3	2	4	4	2	3	2	3	2	4	3	2	3	2	2
21	1	Female	2	Single	1	Senior High School	3	Student	4	PHP 10,000 or less	1	Urban	2	Region III	No	2	2	2	2	5	3	5	2	1	1	2	1	4	2	4	1	Disagree	2	1	3	2	3	4	2	2	1	3	2	3	3	2	2	1	3
20	1	Male	1	Single	1	Senior High School	3	Student	4	PHP 10,000 or less	1	Rural	1	Region V	No	2	2	2	2	3	1	3	1	2	1	3	2	3	2	1	3	Disagree	2	1	2	1	3	2	1	2	1	3	2	3	3	2	3	2	3
20	1	Female	2	Single	1	Senior High School	3	Student	4	PHP 10,000 or less	1	Rural	1	Region IV-A	No	2	2	1	2	4	2	4	2	1	1	3	2	3	2	1	4	Strongly Disagree	1	1	4	2	4	4	2	2	1	3	2	4	3	2	4	2	4
19	1	Female	2	Single	1	Senior High School	3	Student	4	PHP 10,000 or less	1	Urban	2	NCR	No	2	2	1	2	5	3	4	2	2	1	2	1	4	2	1	2	Strongly Disagree	1	1	2	1	1	4	2	4	2	4	2	4	4	2	4	2	4
18	1	Male	1	Single	1	Senior High School	3	Student	4	PHP 10,000 or less	1	Rural	1	Region III	No	2	2	1	2	4	2	4	2	1	1	1	1	4	2	4	1	Agree	3	2	4	2	4	4	2	4	2	3	2	4	4	2	4	2	3
18	1	Female	2	Single	1	Senior High School	3	Student	4	PHP 10,000 or less	1	Rural	1	Region I	No	2	2	1	2	4	2	5	2	2	1	2	1	4	2	1	2	Strongly Agree	4	2	4	2	4	4	2	3	2	4	2	4	3	2	3	2	3
18	1	Female	2	Single	1	Senior High School	3	Student	4	PHP 10,000 or less	1	Urban	2	NCR	Yes	1	2	2	1	4	2	4	2	1	1	3	2	3	2	4	1	Strongly Disagree	1	1	4	2	4	4	2	3	2	4	2	4	4	2	4	2	3
18	1	Female	2	Single	1	Senior High School	3	Student	4	PHP 100,000 or more	4	Urban	2	CAR	No	2	2	1	2	3	1	5	2	3	2	3	2	3	2	1	3	Strongly Agree	4	2	4	2	3	4	2	4	2	4	2	4	4	2	4	2	3
19	1	Female	2	Single	1	Senior High School	3	Student	4	PHP 10,000 or less	1	Rural	1	Region IV-A	No	2	2	2	2	5	3	1	1	1	1	2	1	2	1	4	2	Strongly Agree	4	2	3	2	4	4	2	4	2	3	2	4	4	2	2	1	4
20	1	Male	1	Single	1	Senior High School	3	Student	4	PHP 10,000 or less	1	Urban	2	Region IV-A	No	2	2	1	2	3	1	4	2	2	1	2	1	2	1	1	3	Disagree	2	1	3	2	3	3	2	4	2	4	2	4	3	2	3	2	4
18	1	Male	1	Single	1	Senior High School	3	Student	4	PHP 10,000 or less	1	Rural	1	Region III	No	2	2	1	2	4	2	3	1	2	1	3	2	3	2	4	1	Agree	3	2	3	2	3	3	2	3	2	4	2	4	3	2	3	2	3
18	1	Female	2	Single	1	Senior High School	3	Student	4	PHP 10,000 or less	1	Urban	2	NCR	Yes	1	2	2	2	5	3	3	1	1	1	3	2	3	2	4	3	Disagree	2	1	3	2	3	2	1	2	1	2	1	3	2	1	2	1	3
20	1	Female	2	Single	1	Senior High School	3	Student	4	PHP 20,000 to 100,000	3	Urban	2	NCR	Yes	1	2	1	2	3	1	4	2	1	1	2	1	4	2	4	3	Disagree	2	1	4	2	4	4	2	3	2	4	2	4	3	2	3	2	4
18	1	Male	1	Single	1	Senior High School	3	Student	4	PHP 10,000 or less	1	Rural	1	Region IV-A	No	2	2	2	2	3	1	3	1	3	2	3	2	3	2	1	3	Strongly Disagree	1	1	4	2	4	4	2	3	2	4	2	4	3	2	4	2	3
20	1	Female	2	Single	1	Senior High School	3	Student	4	PHP 10,000 or less	1	Urban	2	NCR	No	2	2	1	2	5	3	3	1	2	1	2	1	2	1	1	1	Strongly Disagree	1	1	1	1	2	4	2	4	2	4	2	3	2	1	2	1	4
19	1	Female	2	Single	1	Senior High School	3	Student	4	PHP 10,000 or less	1	Rural	1	Region III	No	2	2	1	2	3	1	3	1	2	1	2	1	2	1	1	2	Disagree	2	1	3	2	3	4	2	3	2	4	2	4	2	1	2	1	3
18	1	Female	2	Single	1	Senior High School	3	Student	4	PHP 10,000 or less	1	Rural	1	Region III	No	2	2	2	2	4	2	3	1	2	1	2	1	2	1	1	1	Disagree	2	1	3	2	3	4	2	4	2	4	2	4	2	1	2	1	3
20	1	Male	1	Single	1	Senior High School	3	Student	4	PHP 10,000 or less	1	Urban	2	NCR	No	2	2	1	2	4	2	4	2	2	1	2	1	3	2	4	1	Agree	3	2	3	2	3	3	2	3	2	3	2	3	2	1	2	1	3
19	1	Female	2	Single	1	Senior High School	3	Student	4	PHP 10,000 or less	1	Urban	2	NCR	Yes	1	2	1	2	5	3	1	1	1	1	2	1	2	1	1	3	Strongly Disagree	1	1	1	1	2	2	1	2	1	1	1	3	3	2	2	1	4
20	1	Female	2	Single	1	Senior High School	3	Student	4	PHP 20,000 to 100,000	3	Rural	1	Region IV-A	No	2	2	2	2	4	2	3	1	2	1	3	2	2	1	1	4	Strongly Disagree	1	1	2	1	3	3	2	2	1	3	2	3	3	2	2	1	4
19	1	Female	2	Single	1	Senior High School	3	Student	4	PHP 10,000 or less	1	Urban	2	NCR	No	2	2	1	2	4	2	2	1	2	1	2	1	2	1	1	4	Disagree	2	1	2	1	2	3	2	3	2	3	2	3	3	2	2	1	4
20	1	Female	2	Single	1	Senior High School	3	Student	4	PHP 10,000 or less	1	Rural	1	Region IV-A	No	2	2	1	2	3	1	3	1	1	1	2	1	2	1	1	2	Disagree	2	1	3	2	3	4	2	3	2	4	2	4	3	2	2	1	4
18	1	Female	2	Single	1	Senior High School	3	Student	4	PHP 10,000 or less	1	Urban	2	NCR	Yes	1	2	1	2	3	1	3	1	2	1	2	1	2	1	1	1	Strongly Disagree	1	1	3	2	3	4	2	4	2	4	2	3	3	2	2	1	4
19	1	Male	1	Single	1	Senior High School	3	Student	4	PHP 10,000 or less	1	Urban	2	Region IV-A	No	2	2	1	2	4	2	3	1	1	1	1	1	4	2	4	3	Disagree	2	1	4	2	4	4	2	4	2	4	2	4	3	2	2	1	4
21	1	Male	1	Single	1	Senior High School	3	Student	4	PHP 20,000 to 100,000	3	Urban	2	Region III	No	2	2	1	2	4	2	4	2	1	1	2	1	4	2	4	2	Disagree	2	1	4	2	4	4	2	4	2	4	2	4	3	2	2	1	4
18	1	Female	2	Single	1	Senior High School	3	Student	4	PHP 10,000 or less	1	Urban	2	NCR	Yes	1	2	2	2	4	2	3	1	2	1	2	1	3	2	4	3	Disagree	2	1	3	2	3	3	2	3	2	3	2	3	3	2	2	1	4
19	1	Female	2	Single	1	Senior High School	3	Student	4	PHP 10,000 or less	1	Urban	2	Region VII	No	2	2	2	2	4	2	3	1	2	1	2	1	2	1	1	3	Disagree	2	1	3	2	4	4	2	4	2	4	2	4	3	2	2	1	4
19	1	Female	2	Single	1	Senior High School	3	Student	4	PHP 10,000 or less	1	Rural	1	NCR	No	2	2	1	2	5	3	5	2	2	1	3	2	2	1	3	3	Strongly Disagree	1	1	4	2	4	4	2	4	2	4	2	4	4	2	1	1	3
18	1	Female	2	Single	1	Senior High School	3	Student	4	PHP 20,000 to 100,000	3	Rural	1	Region IV-A	No	2	2	2	1	3	1	3	1	1	1	1	1	3	2	1	3	Agree	3	2	4	2	4	4	2	3	2	3	2	4	3	2	2	1	3
21	1	Male	1	Single	1	Senior High School	3	Student	4	PHP 20,000 to 100,000	3	Urban	2	NCR	Yes	1	2	1	2	5	3	3	1	1	1	2	1	2	1	4	3	Strongly Disagree	1	1	1	1	2	2	1	1	1	3	2	3	2	1	3	2	4
19	1	Female	2	Single	1	Senior High School	3	Student	4	PHP 10,000 or less	1	Rural	1	Region III	No	2	2	1	2	4	2	3	1	2	1	2	1	2	1	1	3	Disagree	2	1	4	2	4	4	2	2	1	4	2	4	2	1	3	2	4
20	1	Female	2	Single	1	Senior High School	3	Student	4	PHP 10,000 or less	1	Rural	1	Region IV-A	No	2	2	1	2	4	2	4	2	1	1	2	1	3	2	1	1	Disagree	2	1	4	2	4	4	2	3	2	3	2	4	2	1	3	2	4
19	1	Female	2	Single	1	Senior High School	3	Student	4	PHP 10,000 or less	1	Rural	1	Region II	No	2	2	2	2	5	3	1	1	2	1	2	1	2	1	1	1	Disagree	2	1	4	2	4	4	2	3	2	3	2	3	2	1	3	2	3
20	1	Female	2	Single	1	Senior High School	3	Student	4	PHP 10,000 or less	1	Rural	1	Region II	No	2	2	1	2	4	2	3	1	2	1	2	1	3	2	4	3	Disagree	2	1	2	1	3	3	2	2	1	3	2	3	3	2	3	2	4
19	1	Male	1	Single	1	Senior High School	3	Student	4	PHP 10,000 or less	1	Urban	2	Region III	No	2	2	1	2	5	3	3	1	1	1	3	2	3	2	3	3	Strongly Disagree	1	1	2	1	2	4	2	2	1	4	2	4	4	2	4	2	3
20	1	Female	2	Single	1	Senior High School	3	Student	4	PHP 10,000 or less	1	Rural	1	Region III	No	2	2	1	2	3	1	4	2	2	1	3	2	3	2	1	2	Strongly Disagree	1	1	3	2	3	3	2	2	1	4	2	4	3	2	3	2	3
20	1	Female	2	Single	1	Senior High School	3	Student	4	PHP 10,000 or less	1	Urban	2	Region IV-A	No	2	2	2	2	3	1	4	2	2	1	2	1	3	2	4	4	Strongly Disagree	1	1	3	2	3	3	2	2	1	4	2	4	3	2	3	2	4
18	1	Female	2	Single	1	Senior High School	3	Student	4	PHP 10,000 or less	1	Rural	1	Region III	No	2	2	1	2	4	2	3	1	2	1	2	1	3	2	1	3	Disagree	2	1	4	2	4	4	2	2	1	4	2	4	3	2	3	2	4
18	1	Female	2	Single	1	Senior High School	3	Student	4	PHP 10,000 or less	1	Urban	2	Region IV-A	No	2	2	1	2	4	2	4	2	1	1	3	2	3	2	1	3	Disagree	2	1	4	2	4	4	2	2	1	3	2	4	3	2	3	2	3
18	1	Female	2	Single	1	Senior High School	3	Student	4	PHP 10,000 or less	1	Urban	2	NCR	Yes	1	2	2	2	4	2	4	2	1	1	3	2	3	2	4	2	Strongly Disagree	1	1	4	2	4	4	2	2	1	4	2	4	3	2	3	2	4
20	1	Female	2	Single	1	Senior High School	3	Student	4	PHP 10,000 or less	1	Urban	2	NCR	No	2	2	2	2	4	2	4	2	2	1	3	2	3	2	4	1	Strongly Disagree	1	1	3	2	3	3	2	2	1	4	2	4	3	2	3	2	3
18	1	Male	1	Single	1	Senior High School	3	Student	4	PHP 10,000 or less	1	Rural	1	Region IV-A	No	2	2	1	2	5	3	5	2	3	2	3	2	3	2	1	1	Strongly Disagree	1	1	3	2	4	4	2	2	1	4	2	4	3	2	4	2	4
18	1	Female	2	Single	1	Senior High School	3	Student	4	PHP 10,000 or less	1	Urban	2	Region IV-A	No	2	2	2	2	5	3	3	1	2	1	2	1	2	1	4	3	Strongly Disagree	1	1	3	2	3	3	2	2	1	3	2	3	3	2	3	2	3
20	1	Male	1	Single	1	Senior High School	3	Student	4	PHP 10,000 or less	1	Urban	2	Region VII	No	2	2	2	2	5	3	5	2	4	2	4	2	4	2	1	5	Strongly Disagree	1	1	4	2	4	4	2	2	1	4	2	4	4	2	4	2	4
20	1	Female	2	Single	1	Senior High School	3	Student	4	PHP 10,000 or less	1	Rural	1	Region IV-A	No	2	2	1	2	3	1	3	1	1	1	2	1	3	2	4	2	Agree	3	2	4	2	4	4	2	2	1	4	2	4	3	2	3	2	4
21	1	Female	2	Single	1	Senior High School	3	Student	4	PHP 10,000 or less	1	Urban	2	NCR	No	2	2	1	2	4	2	5	2	2	1	2	1	2	1	1	3	Agree	3	2	4	2	4	4	2	2	1	4	2	4	3	2	3	2	4
18	1	Female	2	Single	1	Senior High School	3	Student	4	PHP 10,000 or less	1	Urban	2	NCR	Yes	1	2	2	2	4	2	4	2	2	1	3	2	4	2	1	2	Agree	3	2	4	2	3	4	2	2	1	4	2	4	3	2	3	2	4
21	1	Female	2	Single	1	Senior High School	3	Student	4	PHP 10,000 or less	1	Urban	2	NCR	No	2	2	2	2	4	2	3	1	1	1	2	1	3	2	4	1	Agree	3	2	3	2	3	3	2	2	1	4	2	3	3	2	3	2	4
19	1	Female	2	Single	1	Senior High School	3	Student	4	PHP 10,000 or less	1	Urban	2	NCR	No	2	2	1	2	5	3	3	1	2	1	2	1	2	1	1	1	Agree	3	2	4	2	4	3	2	2	1	3	2	3	3	2	3	2	4
21	1	Female	2	Single	1	Senior High School	3	Student	4	PHP 10,000 or less	1	Rural	1	Region IV-A	No	2	2	2	2	3	1	3	1	1	1	2	1	3	2	4	1	Strongly Disagree	1	1	3	2	2	2	1	3	2	3	2	3	3	2	3	2	4
18	1	Female	2	Single	1	Senior High School	3	Student	4	PHP 10,000 or less	1	Urban	2	NCR	Yes	1	2	1	2	4	2	4	2	1	1	1	1	4	2	1	4	Disagree	2	1	2	1	3	4	2	4	2	4	2	4	4	2	4	2	4
18	1	Male	1	Single	1	Senior High School	3	Student	4	PHP 10,000 or less	1	Urban	2	NCR	No	2	2	1	2	4	2	5	2	3	2	3	2	3	2	4	1	Strongly Disagree	1	1	2	1	4	3	2	4	2	3	2	4	3	2	3	2	4
20	1	Female	2	Single	1	Senior High School	3	Student	4	PHP 10,000 or less	1	Rural	1	Region III	No	2	2	2	2	5	3	4	2	2	1	3	2	3	2	1	1	Strongly Disagree	1	1	2	1	1	4	2	3	2	4	2	4	4	2	4	2	4
20	1	Female	2	Single	1	Senior High School	3	Student	4	PHP 10,000 or less	1	Rural	1	Region III	No	2	1	1	2	3	1	4	2	1	1	1	1	4	2	4	2	Disagree	2	1	3	2	4	4	2	4	2	3	2	4	4	2	4	2	4
19	1	Female	2	Single	1	Senior High School	3	Student	4	PHP 10,000 or less	1	Rural	1	Region IV-A	No	2	2	1	2	3	1	4	2	3	2	3	2	3	2	4	4	Disagree	2	1	4	2	4	4	2	3	2	4	2	4	3	2	4	2	4
19	1	Male	1	Single	1	Senior High School	3	Student	4	PHP 10,000 or less	1	Urban	2	NCR	No	2	2	1	2	3	1	4	2	2	1	3	2	3	2	1	2	Disagree	2	1	3	2	4	4	2	3	2	3	2	4	3	2	3	2	4
18	1	Female	2	Single	1	Senior High School	3	Student	4	PHP 10,000 to 20,000	2	Rural	1	Region III	No	2	2	2	2	3	1	4	2	2	1	2	1	3	2	4	3	Strongly Disagree	1	1	3	2	3	3	2	3	2	3	2	3	3	2	3	2	4
20	1	Female	2	Single	1	Senior High School	3	Student	4	PHP 20,000 to 100,000	3	Rural	1	Region IV-A	No	2	2	2	2	3	1	4	2	1	1	2	1	3	2	1	3	Strongly Disagree	1	1	3	2	4	3	2	4	2	4	2	4	3	2	3	2	3
18	1	Female	2	Single	1	Senior High School	3	Student	4	PHP 10,000 or less	1	Urban	2	Region IV-A	No	2	2	2	2	3	1	2	1	1	1	1	1	3	2	4	2	Disagree	2	1	3	2	4	4	2	3	2	4	2	4	3	2	3	2	3
20	1	Female	2	Single	1	Senior High School	3	Student	4	PHP 10,000 or less	1	Urban	2	Region III	No	2	2	2	2	3	1	2	1	1	1	1	1	3	2	4	3	Disagree	2	1	4	2	4	4	2	4	2	4	2	4	3	2	3	2	3
20	1	Female	2	Single	1	Senior High School	3	Student	4	PHP 10,000 or less	1	Urban	2	NCR	No	2	2	2	2	3	1	3	1	1	1	2	1	4	2	4	4	Disagree	2	1	4	2	4	4	2	3	2	4	2	4	3	2	3	2	3
21	1	Female	2	Single	1	Senior High School	3	Student	4	PHP 10,000 or less	1	Urban	2	NCR	No	2	2	2	2	3	1	4	2	2	1	3	2	3	2	4	3	Disagree	2	1	4	2	4	4	2	4	2	4	2	4	3	2	3	2	4
20	1	Male	1	Single	1	Senior High School	3	Student	4	PHP 20,000 to 100,000	3	Urban	2	Region IV-A	No	2	2	2	2	3	1	3	1	2	1	2	1	3	2	1	3	Disagree	2	1	3	2	3	3	2	4	2	3	2	3	3	2	3	2	4
21	1	Female	2	Single	1	Senior High School	3	Student	4	PHP 20,000 to 100,000	3	Urban	2	Region III	No	2	2	2	2	3	1	4	2	1	1	3	2	3	2	4	3	Strongly Disagree	1	1	3	2	4	4	2	3	2	4	2	4	3	2	3	2	4
21	1	Male	1	Single	1	Senior High School	3	Student	4	PHP 20,000 to 100,000	3	Urban	2	NCR	No	2	2	2	2	3	1	3	1	1	1	2	1	2	1	1	2	Disagree	2	1	3	2	3	4	2	4	2	4	2	4	3	2	3	2	3
19	1	Female	2	Single	1	Senior High School	3	Student	4	PHP 10,000 or less	1	Rural	1	Region IV-A	No	2	2	1	2	4	2	4	2	2	1	3	2	3	2	1	2	Strongly Disagree	1	1	4	2	4	4	2	4	2	4	2	4	4	2	4	2	4
19	1	Female	2	Single	1	Senior High School	3	Student	4	PHP 10,000 or less	1	Rural	1	Region IV-A	No	2	2	1	2	4	2	3	1	1	1	3	2	3	2	4	2	Disagree	2	1	3	2	3	4	2	3	2	4	2	4	3	2	3	2	4
21	1	Male	1	Single	1	Senior High School	3	Student	4	PHP 10,000 or less	1	Rural	1	Region III	No	2	2	1	2	4	2	3	1	1	1	3	2	3	2	1	1	Disagree	2	1	3	2	3	3	2	3	2	3	2	3	3	2	3	2	3
18	1	Male	1	Single	1	Senior High School	3	Student	4	PHP 20,000 to 100,000	3	Rural	1	Region IV-A	No	2	2	1	2	4	2	3	1	2	1	2	1	2	1	1	1	Disagree	2	1	4	2	4	4	2	3	2	4	2	4	3	2	3	2	4
18	1	Female	2	Single	1	Senior High School	3	Student	4	PHP 10,000 or less	1	Urban	2	Region IV-A	No	2	2	1	2	4	2	3	1	2	1	2	1	3	2	1	3	Disagree	2	1	4	2	4	4	2	3	2	4	2	4	3	2	3	2	4
19	1	Male	1	Single	1	Senior High School	3	Student	4	PHP 10,000 or less	1	Urban	2	NCR	No	2	2	1	2	4	2	2	1	2	1	2	1	3	2	1	4	Disagree	2	1	3	2	3	4	2	3	2	3	2	3	3	2	3	2	3
20	1	Female	2	Single	1	Senior High School	3	Student	4	PHP 10,000 or less	1	Urban	2	NCR	Yes	1	2	1	2	4	2	5	2	3	2	3	2	3	2	1	3	Disagree	2	1	4	2	4	4	2	3	2	4	2	4	4	2	4	2	4
20	1	Female	2	Single	1	Senior High School	3	Student	4	PHP 10,000 or less	1	Urban	2	NCR	No	2	2	1	2	4	2	3	1	1	1	2	1	3	2	4	3	Disagree	2	1	3	2	4	4	2	3	2	4	2	4	3	2	3	2	3
19	1	Female	2	Single	1	Senior High School	3	Student	4	PHP 20,000 to 100,000	3	Urban	2	NCR	No	2	2	1	2	4	2	4	2	1	1	2	1	3	2	4	3	Disagree	2	1	4	2	3	3	2	3	2	4	2	3	4	2	4	2	4
18	1	Female	2	Single	1	Senior High School	3	Student	4	PHP 10,000 or less	1	Rural	1	Region V	No	2	1	2	2	4	2	5	2	2	1	3	2	4	2	4	3	Disagree	2	1	4	2	4	4	2	4	2	4	2	4	4	2	4	2	4
19	1	Female	2	Single	1	Senior High School	3	Student	4	PHP 10,000 or less	1	Rural	1	CAR	No	2	2	2	2	4	2	3	1	2	1	3	2	2	1	1	3	Strongly Disagree	1	1	4	2	4	4	2	3	2	4	2	4	3	2	3	2	4
18	1	Female	2	Single	1	Senior High School	3	Student	4	PHP 20,000 to 100,000	3	Rural	1	Region IV-A	No	2	2	2	2	4	2	4	2	2	1	2	1	2	1	1	2	Disagree	2	1	3	2	4	4	2	3	2	3	2	4	3	2	3	2	3
21	1	Female	2	Single	1	Senior High School	3	Student	4	PHP 100,000 or more	4	Rural	1	Region IV-A	No	2	2	2	2	4	2	4	2	1	1	2	1	3	2	4	1	Strongly Disagree	1	1	4	2	4	4	2	4	2	4	2	4	4	2	4	2	3
19	1	Female	2	Single	1	Senior High School	3	Student	4	PHP 10,000 or less	1	Urban	2	NCR	Yes	1	2	2	2	4	2	3	1	2	1	3	2	3	2	1	2	Disagree	2	1	4	2	4	4	2	3	2	4	2	4	3	2	3	2	3
19	1	Female	2	Single	1	Senior High School	3	Student	4	PHP 10,000 or less	1	Urban	2	Region IV-A	No	2	2	2	2	4	2	5	2	1	1	3	2	4	2	4	3	Disagree	2	1	4	2	4	4	2	3	2	4	2	4	4	2	4	2	3
19	1	Female	2	Single	1	Senior High School	3	Student	4	PHP 10,000 or less	1	Urban	2	NCR	Yes	1	2	2	2	4	2	4	2	2	1	3	2	3	2	4	2	Disagree	2	1	4	2	4	4	2	3	2	4	2	4	3	2	3	2	3
19	1	Male	1	Single	1	Senior High School	3	Student	4	PHP 10,000 or less	1	Urban	2	NCR	No	2	2	2	2	4	2	4	2	2	1	3	2	3	2	1	5	Disagree	2	1	4	2	4	3	2	3	2	4	2	4	4	2	4	2	4
20	1	Female	2	Single	1	Senior High School	3	Student	4	PHP 10,000 or less	1	Urban	2	NCR	No	2	2	2	2	4	2	3	1	2	1	2	1	2	1	4	1	Strongly Disagree	1	1	3	2	3	4	2	4	2	4	2	4	3	2	3	2	3
18	1	Male	1	Single	1	Senior High School	3	Student	4	PHP 10,000 to 20,000	2	Urban	2	NCR	Yes	1	2	2	2	4	2	3	1	1	1	2	1	3	2	4	2	Disagree	2	1	3	2	3	4	2	3	2	4	2	4	3	2	3	2	4
18	1	Female	2	Single	1	Senior High School	3	Student	4	PHP 100,000 or more	4	Urban	2	Region IV-A	No	2	2	2	2	4	2	4	2	1	1	3	2	3	2	4	3	Strongly Disagree	1	1	4	2	4	4	2	4	2	4	2	4	3	2	3	2	4
19	1	Female	2	Single	1	Senior High School	3	Student	4	PHP 10,000 or less	1	Rural	1	Region IV-A	No	2	2	1	2	5	3	3	1	2	1	2	1	3	2	1	3	Strongly Disagree	1	1	3	2	4	3	2	3	2	3	2	4	3	2	3	2	4
19	1	Female	2	Single	1	Senior High School	3	Student	4	PHP 10,000 or less	1	Rural	1	Region III	No	2	2	1	2	5	3	3	1	2	1	3	2	3	2	3	3	Disagree	2	1	3	2	3	3	2	3	2	3	2	3	3	2	3	2	3
20	1	Female	2	Single	1	Senior High School	3	Student	4	PHP 10,000 or less	1	Urban	2	NCR	Yes	1	2	1	2	5	3	3	1	1	1	2	1	4	2	4	3	Disagree	2	1	4	2	4	4	2	3	2	4	2	4	3	2	4	2	4
20	1	Female	2	Single	1	Senior High School	3	Student	4	PHP 10,000 or less	1	Urban	2	NCR	No	2	2	1	2	5	3	4	2	2	1	3	2	3	2	1	3	Strongly Disagree	1	1	4	2	4	4	2	4	2	4	2	4	3	2	3	2	4
19	1	Female	2	Single	1	Senior High School	3	Housewife/Retired/Unemployed/Other	5	PHP 10,000 or less	1	Urban	2	NCR	No	2	2	1	2	5	3	3	1	2	1	2	1	3	2	1	1	Disagree	2	1	3	2	3	3	2	3	2	4	2	4	3	2	3	2	4
21	1	Male	1	Single	1	Senior High School	3	Student	4	PHP 100,000 or more	4	Urban	2	NCR	No	2	2	1	2	5	3	5	2	1	1	2	1	4	2	4	2	Strongly Disagree	1	1	4	2	4	3	2	3	2	4	2	4	4	2	4	2	3
19	1	Female	2	Single	1	Senior High School	3	Student	4	PHP 20,000 to 100,000	3	Rural	1	Region IV-A	No	2	2	2	2	5	3	3	1	1	1	3	2	3	2	4	2	Strongly Disagree	1	1	4	2	4	3	2	4	2	4	2	4	3	2	3	2	4
18	1	Female	2	Single	1	Senior High School	3	Student	4	PHP 10,000 or less	1	Urban	2	NCR	No	2	2	2	2	5	3	3	1	1	1	1	1	3	2	4	1	Strongly Disagree	1	1	4	2	4	4	2	4	2	4	2	4	3	2	3	2	4
19	1	Female	2	Single	1	Senior High School	3	Student	4	PHP 10,000 or less	1	Urban	2	Region IV-A	No	2	2	2	2	5	3	3	1	2	1	2	1	3	2	1	3	Disagree	2	1	3	2	4	4	2	4	2	4	2	4	3	2	3	2	4
19	1	Female	2	Single	1	Senior High School	3	Student	4	PHP 10,000 or less	1	Urban	2	NCR	No	2	2	2	2	5	3	4	2	2	1	2	1	2	1	1	5	Strongly Disagree	1	1	3	2	4	4	2	4	2	4	2	4	3	2	3	2	3
19	1	Female	2	Single	1	Senior High School	3	Student	4	PHP 10,000 or less	1	Rural	1	Region IV-A	No	2	2	1	2	3	1	3	1	2	1	3	2	4	2	4	3	Agree	3	2	3	2	3	4	2	3	2	4	2	3	3	2	3	2	4
18	1	Female	2	Single	1	Senior High School	3	Student	4	PHP 10,000 or less	1	Urban	2	NCR	Yes	1	2	2	2	3	1	3	1	1	1	1	1	3	2	1	2	Agree	3	2	4	2	4	4	2	3	2	4	2	4	4	2	4	2	4
18	1	Female	2	Single	1	Senior High School	3	Student	4	PHP 10,000 or less	1	Rural	1	Region IV-A	No	2	2	1	1	4	2	5	2	2	1	3	2	3	2	1	3	Agree	3	2	4	2	4	4	2	4	2	4	2	4	4	2	4	2	4
19	1	Female	2	Single	1	Senior High School	3	Student	4	PHP 10,000 or less	1	Rural	1	Region VII	No	2	2	1	2	4	2	3	1	2	1	2	1	3	2	4	1	Agree	3	2	4	2	4	4	2	4	2	4	2	4	4	2	4	2	4
20	1	Female	2	Single	1	Senior High School	3	Student	4	PHP 10,000 or less	1	Urban	2	Region IV-A	No	2	2	1	2	4	2	4	2	2	1	2	1	3	2	4	5	Agree	3	2	3	2	4	3	2	3	2	4	2	4	3	2	3	2	3
20	1	Female	2	Single	1	Senior High School	3	Student	4	PHP 10,000 or less	1	Urban	2	Region XI	No	2	2	1	2	4	2	5	2	2	1	3	2	3	2	1	3	Agree	3	2	4	2	4	4	2	4	2	4	2	4	3	2	3	2	4
20	1	Male	1	Single	1	Senior High School	3	Student	4	PHP 10,000 or less	1	Urban	2	Region VII	No	2	2	1	2	4	2	3	1	3	2	3	2	3	2	1	3	Agree	3	2	3	2	3	3	2	3	2	4	2	4	3	2	3	2	4
19	1	Female	2	Single	1	Senior High School	3	Student	4	PHP 10,000 or less	1	Urban	2	Region V	No	2	2	2	2	4	2	4	2	1	1	2	1	3	2	4	3	Agree	3	2	4	2	4	4	2	4	2	4	2	4	3	2	4	2	3
20	1	Female	2	Single	1	Senior High School	3	Student	4	PHP 10,000 or less	1	Urban	2	Region X	No	2	2	2	2	4	2	4	2	1	1	1	1	3	2	4	5	Agree	3	2	4	2	4	4	2	4	2	4	2	4	4	2	3	2	3
21	1	Female	2	Single	1	Senior High School	3	Student	4	PHP 10,000 to 20,000	2	Urban	2	Region IV-A	No	2	2	1	2	5	3	4	2	3	2	3	2	3	2	1	3	Agree	3	2	4	2	4	4	2	3	2	4	2	4	4	2	4	2	4
22	1	Female	2	Single	1	College/University or Above	4	Housewife/Retired/Unemployed/Other	5	PHP 10,000 or less	1	Rural	1	Region IV-A	No	2	2	1	2	4	2	5	2	2	1	3	2	4	2	1	4	Disagree	2	1	3	2	3	4	2	3	2	2	1	4	2	1	2	1	2
34	2	Female	2	Single	1	College/University or Above	4	Professional/White Collar Worker	2	PHP 100,000 or more	4	Urban	2	Region VI	No	2	2	1	2	4	2	5	2	3	2	3	2	3	2	1	4	Strongly Disagree	1	1	2	1	3	3	2	1	1	1	1	3	4	2	3	2	2
64	5	Female	2	Married	2	College/University or Above	4	Housewife/Retired/Unemployed/Other	5	PHP 20,000 to 100,000	3	Urban	2	CAR	No	2	2	1	2	5	3	5	2	1	1	3	2	4	2	4	3	Agree	3	2	2	1	2	3	2	1	1	3	2	2	4	2	4	2	2
40	2	Female	2	Married	2	College/University or Above	4	Professional/White Collar Worker	2	PHP 10,000 to 20,000	2	Urban	2	Region VI	No	2	2	1	2	5	3	5	2	3	2	3	2	3	2	1	1	Strongly Disagree	1	1	4	2	4	4	2	3	2	4	2	4	4	2	3	2	2
18	1	Female	2	Single	1	College/University or Above	4	Student	4	PHP 10,000 or less	1	Urban	2	NCR	No	2	2	1	2	3	1	5	2	2	1	3	2	3	2	1	4	Disagree	2	1	2	1	2	4	2	2	1	2	1	2	4	2	4	2	3
44	3	Female	2	Married	2	College/University or Above	4	Housewife/Retired/Unemployed/Other	5	PHP 10,000 or less	1	Urban	2	Region VII	No	2	2	2	2	4	2	3	1	2	1	2	1	2	1	1	3	Disagree	2	1	2	1	3	2	1	2	1	2	1	2	3	2	2	1	2
23	1	Female	2	Single	1	College/University or Above	4	Student	4	PHP 10,000 or less	1	Urban	2	Region IV-A	No	2	2	1	2	4	2	5	2	1	1	2	1	3	2	1	4	Disagree	2	1	3	2	3	3	2	2	1	4	2	4	3	2	3	2	2
48	3	Female	2	Married	2	College/University or Above	4	Housewife/Retired/Unemployed/Other	5	PHP 100,000 or more	4	Urban	2	NCR	No	2	2	1	2	4	2	5	2	2	1	2	1	3	2	4	3	Disagree	2	1	3	2	4	3	2	3	2	4	2	4	4	2	4	2	3
73	5	Female	2	Single	1	College/University or Above	4	Housewife/Retired/Unemployed/Other	5	PHP 20,000 to 100,000	3	Rural	1	CAR	No	2	2	1	2	5	3	5	2	2	1	2	1	3	2	1	2	Strongly Disagree	1	1	2	1	3	3	2	2	1	4	2	4	4	2	4	2	3
48	3	Female	2	Single	1	College/University or Above	4	Professional/White Collar Worker	2	PHP 100,000 or more	4	Urban	2	NCR	No	2	2	1	2	5	3	5	2	2	1	3	2	4	2	4	1	Agree	3	2	3	2	3	4	2	3	2	4	2	4	4	2	4	2	4
66	5	Female	2	Single	1	College/University or Above	4	Professional/White Collar Worker	2	PHP 100,000 or more	4	Urban	2	NCR	No	2	2	1	2	4	2	5	2	3	2	2	1	4	2	4	2	Disagree	2	1	2	1	3	3	2	2	1	2	1	3	3	2	3	2	2
51	4	Female	2	Married	2	College/University or Above	4	Professional/White Collar Worker	2	PHP 20,000 to 100,000	3	Rural	1	Region VII	No	2	2	2	2	5	3	4	2	3	2	3	2	3	2	1	2	Strongly Disagree	1	1	1	1	1	4	2	4	2	4	2	4	4	2	4	2	2
61	5	Male	1	Married	2	College/University or Above	4	Professional/White Collar Worker	2	PHP 100,000 or more	4	Urban	2	NCR	No	2	2	1	1	4	2	5	2	3	2	2	1	3	2	4	3	Disagree	2	1	3	2	4	4	2	3	2	4	2	4	4	2	4	2	2
68	5	Female	2	Married	2	College/University or Above	4	Housewife/Retired/Unemployed/Other	5	PHP 100,000 or more	4	Urban	2	NCR	No	2	2	2	1	4	2	5	2	2	1	2	1	3	2	4	2	Disagree	2	1	3	2	3	4	2	3	2	3	2	3	4	2	4	2	2
83	5	Female	2	Married	2	College/University or Above	4	Housewife/Retired/Unemployed/Other	5	PHP 10,000 to 20,000	2	Urban	2	NCR	Yes	1	2	1	2	4	2	5	2	3	2	2	1	4	2	1	3	Strongly Disagree	1	1	3	2	3	4	2	4	2	3	2	3	4	2	4	2	2
46	3	Female	2	Single	1	College/University or Above	4	Professional/White Collar Worker	2	PHP 20,000 to 100,000	3	Urban	2	Region VI	No	2	2	1	1	4	2	5	2	3	2	3	2	3	2	1	3	Disagree	2	1	2	1	3	3	2	2	1	3	2	3	3	2	3	2	3
62	5	Female	2	Married	2	College/University or Above	4	Professional/White Collar Worker	2	PHP 10,000 to 20,000	2	Urban	2	Region XI	No	2	2	1	1	4	2	5	2	3	2	3	2	3	2	1	2	Disagree	2	1	3	2	3	4	2	2	1	3	2	3	3	2	3	2	3
66	5	Male	1	Married	2	College/University or Above	4	Professional/White Collar Worker	2	PHP 100,000 or more	4	Urban	2	Region IX	Yes	1	2	1	1	3	1	5	2	2	1	2	1	4	2	4	4	Disagree	2	1	3	2	3	4	2	3	2	4	2	3	4	2	3	2	3
64	5	Female	2	Married	2	College/University or Above	4	Professional/White Collar Worker	2	PHP 20,000 to 100,000	3	Urban	2	NCR	No	2	2	1	1	4	2	5	2	1	1	1	1	3	2	4	1	Disagree	2	1	3	2	3	4	2	3	2	3	2	4	3	2	3	2	3
44	3	Female	2	Married	2	College/University or Above	4	Professional/White Collar Worker	2	PHP 20,000 to 100,000	3	Urban	2	Region VI	No	2	2	1	2	4	2	2	1	3	2	3	2	3	2	1	1	Disagree	2	1	3	2	3	3	2	3	2	3	2	3	3	2	3	2	3
66	5	Female	2	Married	2	College/University or Above	4	Housewife/Retired/Unemployed/Other	5	PHP 10,000 to 20,000	2	Urban	2	NCR	Yes	1	2	1	2	5	3	5	2	1	1	1	1	4	2	4	1	Disagree	2	1	3	2	4	4	2	4	2	3	2	4	4	2	4	2	3
64	5	Male	1	Married	2	College/University or Above	4	Self-employed	3	PHP 20,000 to 100,000	3	Urban	2	NCR	No	2	2	1	2	3	1	5	2	3	2	3	2	4	2	4	3	Agree	3	2	3	2	3	4	2	4	2	4	2	4	3	2	3	2	3
57	4	Female	2	Married	2	College/University or Above	4	Professional/White Collar Worker	2	PHP 100,000 or more	4	Urban	2	Region XI	No	2	2	1	2	4	2	5	2	3	2	3	2	3	2	1	4	Agree	3	2	3	2	3	3	2	3	2	3	2	3	3	2	3	2	3
70	5	Female	2	Married	2	College/University or Above	4	Self-employed	3	PHP 100,000 or more	4	Urban	2	Region II	No	2	2	2	2	5	3	5	2	1	1	1	1	4	2	4	3	Strongly Disagree	1	1	2	1	2	4	2	4	2	4	2	4	4	2	4	2	3
53	4	Female	2	Married	2	College/University or Above	4	Professional/White Collar Worker	2	PHP 20,000 to 100,000	3	Urban	2	NCR	No	2	2	1	2	4	2	5	2	1	1	1	1	3	2	4	4	Disagree	2	1	4	2	4	4	2	4	2	4	2	4	3	2	3	2	4
73	5	Female	2	Married	2	College/University or Above	4	Housewife/Retired/Unemployed/Other	5	PHP 10,000 to 20,000	2	Urban	2	NCR	No	2	2	1	2	5	3	5	2	1	1	1	1	3	2	1	1	Disagree	2	1	3	2	3	4	2	2	1	4	2	4	3	2	3	2	3
37	2	Female	2	Married	2	College/University or Above	4	Housewife/Retired/Unemployed/Other	5	PHP 10,000 or less	1	Urban	2	NCR	No	2	2	2	2	5	3	4	2	3	2	3	2	3	2	1	3	Strongly Disagree	1	1	3	2	3	4	2	2	1	4	2	4	3	2	3	2	3
47	3	Male	1	Married	2	College/University or Above	4	Professional/White Collar Worker	2	PHP 100,000 or more	4	Urban	2	NCR	Yes	1	2	1	2	5	3	5	2	2	1	2	1	3	2	4	3	Disagree	2	1	3	2	3	3	2	3	2	3	2	3	3	2	3	2	3
65	5	Female	2	Married	2	College/University or Above	4	Professional/White Collar Worker	2	PHP 10,000 to 20,000	2	Urban	2	Region IV-A	No	2	2	1	1	5	3	5	2	2	1	2	1	3	2	4	3	Agree	3	2	3	2	3	4	2	3	2	3	2	3	4	2	4	2	3
62	5	Male	1	Married	2	College/University or Above	4	Professional/White Collar Worker	2	PHP 100,000 or more	4	Urban	2	NCR	No	2	2	1	1	4	2	5	2	2	1	2	1	3	2	4	3	Disagree	2	1	3	2	4	4	2	2	1	3	2	2	3	2	3	2	2
20	1	Female	2	Single	1	College/University or Above	4	Student	4	PHP 10,000 or less	1	Urban	2	NCR	No	2	2	1	2	5	3	5	2	2	1	2	1	3	2	4	4	Disagree	2	1	3	2	3	3	2	2	1	3	2	3	3	2	3	2	2
62	5	Female	2	Married	2	College/University or Above	4	Self-employed	3	PHP 100,000 or more	4	Urban	2	Region IV-A	No	2	2	1	2	4	2	5	2	2	1	1	1	4	2	4	2	Disagree	2	1	2	1	3	3	2	3	2	4	2	3	4	2	4	2	2
36	2	Male	1	Single	1	College/University or Above	4	Professional/White Collar Worker	2	PHP 20,000 to 100,000	3	Rural	1	Region III	No	2	2	1	2	4	2	5	2	2	1	2	1	3	2	4	2	Disagree	2	1	3	2	3	4	2	3	2	3	2	3	3	2	3	2	2
54	4	Male	1	Single	1	College/University or Above	4	Professional/White Collar Worker	2	PHP 10,000 or less	1	Urban	2	NCR	Yes	1	2	1	2	4	2	5	2	3	2	3	2	4	2	4	1	Strongly Agree	4	2	3	2	3	3	2	3	2	3	2	4	3	2	3	2	2
52	4	Female	2	Single	1	College/University or Above	4	Professional/White Collar Worker	2	PHP 20,000 to 100,000	3	Urban	2	NCR	Yes	1	2	1	2	5	3	5	2	2	1	2	1	4	2	4	4	Agree	3	2	4	2	4	4	2	3	2	4	2	4	3	2	3	2	2
56	4	Female	2	Married	2	College/University or Above	4	Professional/White Collar Worker	2	PHP 20,000 to 100,000	3	Urban	2	NCR	No	2	2	1	1	4	2	5	2	2	1	2	1	4	2	4	3	Disagree	2	1	2	1	3	4	2	3	2	3	2	3	2	1	2	1	3
39	2	Male	1	Single	1	College/University or Above	4	Blue Collar Worker	1	PHP 20,000 to 100,000	3	Rural	1	NCR	Yes	1	2	1	2	3	1	5	2	3	2	3	2	3	2	1	3	Agree	3	2	3	2	3	3	2	2	1	3	2	4	4	2	4	2	3
64	5	Female	2	Single	1	College/University or Above	4	Housewife/Retired/Unemployed/Other	5	PHP 10,000 to 20,000	2	Urban	2	NCR	No	2	2	1	2	5	3	5	2	2	1	2	1	4	2	1	3	Strongly Disagree	1	1	2	1	2	4	2	3	2	4	2	4	3	2	3	2	3
71	5	Female	2	Married	2	College/University or Above	4	Housewife/Retired/Unemployed/Other	5	PHP 20,000 to 100,000	3	Urban	2	NCR	No	2	2	1	2	5	3	5	2	4	2	4	2	4	2	4	1	Strongly Disagree	1	1	2	1	2	4	2	4	2	4	2	4	4	2	4	2	3
21	1	Female	2	Single	1	College/University or Above	4	Student	4	PHP 10,000 to 20,000	2	Urban	2	NCR	No	2	2	1	2	4	2	4	2	2	1	3	2	4	2	4	4	Agree	3	2	3	2	3	3	2	3	2	3	2	3	4	2	4	2	3
22	1	Male	1	Single	1	College/University or Above	4	Student	4	PHP 10,000 to 20,000	2	Urban	2	Region IV-A	No	2	2	1	2	4	2	5	2	1	1	2	1	4	2	4	3	Agree	3	2	4	2	4	4	2	2	1	4	2	4	4	2	4	2	2
56	4	Female	2	Married	2	College/University or Above	4	Professional/White Collar Worker	2	PHP 20,000 to 100,000	3	Urban	2	NCR	No	2	2	1	1	4	2	4	2	2	1	2	1	3	2	1	3	Agree	3	2	3	2	3	3	2	3	2	3	2	3	3	2	3	2	2
24	1	Female	2	Single	1	College/University or Above	4	Professional/White Collar Worker	2	PHP 10,000 or less	1	Rural	1	Region X	No	2	2	2	2	3	1	5	2	3	2	3	2	3	2	1	2	Disagree	2	1	3	2	4	3	2	3	2	3	2	3	3	2	3	2	2
28	1	Male	1	Married	2	College/University or Above	4	Professional/White Collar Worker	2	PHP 20,000 to 100,000	3	Rural	1	Region VIII	No	2	2	1	2	4	2	5	2	4	2	4	2	4	2	1	4	Agree	3	2	4	2	4	4	2	3	2	4	2	4	4	2	3	2	3
20	1	Female	2	Single	1	College/University or Above	4	Student	4	PHP 10,000 or less	1	Urban	2	NCR	No	2	2	1	2	4	2	4	2	3	2	4	2	4	2	4	3	Agree	3	2	3	2	4	4	2	3	2	4	2	4	4	2	4	2	3
25	1	Male	1	Single	1	College/University or Above	4	Professional/White Collar Worker	2	PHP 10,000 to 20,000	2	Urban	2	NCR	No	2	2	1	2	4	2	5	2	3	2	3	2	3	2	1	2	Disagree	2	1	2	1	2	3	2	2	1	3	2	3	3	2	3	2	3
41	3	Male	1	Single	1	College/University or Above	4	Professional/White Collar Worker	2	PHP 20,000 to 100,000	3	Urban	2	Region IV-A	No	2	2	1	2	4	2	4	2	3	2	2	1	3	2	4	1	Disagree	2	1	3	2	3	3	2	2	1	3	2	4	3	2	3	2	4
21	1	Female	2	Single	1	College/University or Above	4	Student	4	PHP 10,000 or less	1	Rural	1	Region IV-A	No	2	2	1	2	5	3	5	2	1	1	2	1	3	2	1	3	Strongly Disagree	1	1	3	2	4	4	2	2	1	3	2	4	4	2	4	2	4
53	4	Male	1	Single	1	College/University or Above	4	Professional/White Collar Worker	2	PHP 100,000 or more	4	Rural	1	Region IV-A	No	2	2	1	2	5	3	5	2	2	1	2	1	3	2	4	1	Strongly Disagree	1	1	3	2	3	3	2	2	1	3	2	3	3	2	3	2	3
61	5	Female	2	Married	2	College/University or Above	4	Professional/White Collar Worker	2	PHP 100,000 or more	4	Urban	2	Region III	No	2	2	1	2	5	3	5	2	1	1	2	1	4	2	4	3	Disagree	2	1	3	2	3	3	2	2	1	3	2	3	3	2	3	2	3
50	3	Female	2	Married	2	College/University or Above	4	Blue Collar Worker	1	PHP 10,000 to 20,000	2	Urban	2	NCR	Yes	1	2	1	2	4	2	5	2	1	1	1	1	3	2	4	2	Disagree	2	1	2	1	3	4	2	3	2	4	2	4	3	2	3	2	3
39	2	Female	2	Married	2	College/University or Above	4	Professional/White Collar Worker	2	PHP 20,000 to 100,000	3	Urban	2	NCR	Yes	1	2	2	2	5	3	4	2	2	1	2	1	3	2	1	3	Strongly Disagree	1	1	1	1	1	4	2	3	2	4	2	4	4	2	4	2	4
45	3	Male	1	Married	2	College/University or Above	4	Professional/White Collar Worker	2	PHP 20,000 to 100,000	3	Urban	2	NCR	No	2	2	1	1	4	2	5	2	3	2	2	1	4	2	4	2	Disagree	2	1	4	2	4	4	2	3	2	4	2	4	4	2	4	2	3
38	2	Male	1	Single	1	College/University or Above	4	Professional/White Collar Worker	2	PHP 20,000 to 100,000	3	Rural	1	Region III	No	2	2	1	2	4	2	4	2	3	2	3	2	3	2	1	2	Disagree	2	1	3	2	3	3	2	3	2	3	2	3	3	2	3	2	3
71	5	Female	2	Married	2	College/University or Above	4	Self-employed	3	PHP 100,000 or more	4	Urban	2	NCR	Yes	1	2	1	1	5	3	5	2	1	1	1	1	4	2	4	1	Strongly Disagree	1	1	3	2	4	4	2	4	2	4	2	4	4	2	4	2	3
19	1	Female	2	Single	1	College/University or Above	4	Student	4	PHP 10,000 or less	1	Urban	2	NCR	Yes	1	2	2	2	5	3	5	2	2	1	2	1	3	2	4	4	Strongly Disagree	1	1	3	2	4	4	2	3	2	4	2	4	4	2	3	2	3
50	3	Male	1	Married	2	College/University or Above	4	Professional/White Collar Worker	2	PHP 20,000 to 100,000	3	Urban	2	NCR	No	2	2	1	1	3	1	4	2	3	2	3	2	3	2	2	4	Agree	3	2	3	2	3	4	2	4	2	3	2	3	3	2	3	2	3
20	1	Male	1	Single	1	College/University or Above	4	Student	4	PHP 10,000 or less	1	Urban	2	Region IV-A	No	2	2	2	2	3	1	4	2	1	1	1	1	3	2	4	1	Agree	3	2	3	2	3	3	2	3	2	3	2	3	4	2	4	2	3
60	4	Female	2	Married	2	College/University or Above	4	Housewife/Retired/Unemployed/Other	5	PHP 20,000 to 100,000	3	Urban	2	NCR	Yes	1	1	1	2	4	2	4	2	2	1	2	1	3	2	4	3	Agree	3	2	4	2	4	4	2	4	2	4	2	4	3	2	3	2	4
19	1	Female	2	Single	1	College/University or Above	4	Student	4	PHP 10,000 or less	1	Rural	1	Region I	Yes	1	2	2	2	4	2	4	2	2	1	2	1	3	2	1	1	Agree	3	2	4	2	4	4	2	4	2	4	2	4	4	2	4	2	3
30	1	Male	1	Single	1	College/University or Above	4	Professional/White Collar Worker	2	PHP 100,000 or more	4	Urban	2	NCR	Yes	1	2	1	2	4	2	3	1	2	1	2	1	3	2	4	2	Agree	3	2	4	2	4	3	2	3	2	2	1	4	4	2	4	2	2
52	4	Female	2	Married	2	College/University or Above	4	Housewife/Retired/Unemployed/Other	5	PHP 10,000 or less	1	Rural	1	Region IV-A	No	2	2	1	2	4	2	4	2	3	2	3	2	3	2	1	1	Disagree	2	1	4	2	4	4	2	3	2	4	2	4	4	2	4	2	3
66	5	Male	1	Married	2	College/University or Above	4	Professional/White Collar Worker	2	PHP 20,000 to 100,000	3	Urban	2	NCR	No	2	2	1	2	3	1	5	2	2	1	2	1	3	2	4	2	Agree	3	2	3	2	3	4	2	3	2	3	2	3	3	2	3	2	3
67	5	Female	2	Married	2	College/University or Above	4	Housewife/Retired/Unemployed/Other	5	PHP 10,000 or less	1	Urban	2	NCR	No	2	2	1	2	4	2	5	2	1	1	1	1	4	2	4	1	Disagree	2	1	3	2	4	4	2	2	1	3	2	4	3	2	3	2	3
62	5	Male	1	Single	1	College/University or Above	4	Professional/White Collar Worker	2	PHP 20,000 to 100,000	3	Urban	2	NCR	No	2	2	1	1	3	1	3	1	2	1	2	1	3	2	1	1	Agree	3	2	3	2	3	4	2	4	2	4	2	4	4	2	3	2	3
70	5	Female	2	Married	2	College/University or Above	4	Housewife/Retired/Unemployed/Other	5	PHP 20,000 to 100,000	3	Urban	2	Region IV-A	No	2	2	1	1	3	1	4	2	1	1	1	1	4	2	4	2	Disagree	2	1	4	2	4	4	2	4	2	4	2	4	4	2	4	2	3
71	5	Female	2	Married	2	College/University or Above	4	Professional/White Collar Worker	2	PHP 100,000 or more	4	Urban	2	NCR	No	2	2	1	2	4	2	2	1	1	1	1	1	3	2	4	1	Strongly Disagree	1	1	1	1	3	4	2	2	1	1	1	3	3	2	2	1	4
29	1	Male	1	Single	1	College/University or Above	4	Professional/White Collar Worker	2	PHP 20,000 to 100,000	3	Urban	2	NCR	No	2	2	1	2	5	3	5	2	1	1	4	2	4	2	1	3	Strongly Disagree	1	1	1	1	1	1	1	1	1	1	1	1	4	2	4	2	4
65	5	Male	1	Married	2	College/University or Above	4	Housewife/Retired/Unemployed/Other	5	PHP 100,000 or more	4	Rural	1	Region V	No	2	2	1	2	4	2	4	2	3	2	3	2	3	2	1	1	Disagree	2	1	3	2	3	4	2	3	2	3	2	3	3	2	3	2	3
70	5	Female	2	Married	2	College/University or Above	4	Professional/White Collar Worker	2	PHP 100,000 or more	4	Urban	2	Region IV-A	Yes	1	2	1	2	5	3	5	2	1	1	1	1	4	2	4	1	Agree	3	2	3	2	3	4	2	4	2	4	2	2	3	2	3	2	3
28	1	Male	1	Single	1	College/University or Above	4	Student	4	PHP 10,000 or less	1	Urban	2	NCR	Yes	1	2	2	2	5	3	5	2	3	2	3	2	3	2	2	1	Strongly Disagree	1	1	3	2	3	3	2	3	2	4	2	3	2	1	3	2	2
67	5	Female	2	Single	1	College/University or Above	4	Housewife/Retired/Unemployed/Other	5	PHP 20,000 to 100,000	3	Urban	2	NCR	Yes	1	2	1	1	5	3	5	2	1	1	1	1	3	2	4	3	Disagree	2	1	3	2	3	3	2	2	1	3	2	3	3	2	3	2	3
73	5	Male	1	Married	2	College/University or Above	4	Self-employed	3	PHP 100,000 or more	4	Urban	2	NCR	No	2	1	1	1	3	1	5	2	2	1	2	1	3	2	4	4	Disagree	2	1	3	2	3	4	2	3	2	4	2	3	4	2	4	2	3
61	5	Male	1	Married	2	College/University or Above	4	Professional/White Collar Worker	2	PHP 100,000 or more	4	Urban	2	Region VI	No	2	1	1	1	3	1	5	2	2	1	2	1	3	2	4	4	Strongly Agree	4	2	4	2	3	4	2	4	2	4	2	4	4	2	4	2	2
18	1	Female	2	Single	1	College/University or Above	4	Student	4	PHP 10,000 or less	1	Urban	2	Region IV-A	No	2	2	2	2	4	2	4	2	3	2	3	2	3	2	1	2	Disagree	2	1	3	2	4	3	2	3	2	3	2	4	4	2	4	2	2
20	1	Male	1	Single	1	College/University or Above	4	Student	4	PHP 10,000 or less	1	Rural	1	Region IV-A	No	2	2	1	2	4	2	5	2	3	2	3	2	4	2	1	5	Disagree	2	1	4	2	4	4	2	3	2	4	2	4	4	2	4	2	3
57	4	Male	1	Married	2	College/University or Above	4	Professional/White Collar Worker	2	PHP 20,000 to 100,000	3	Urban	2	NCR	Yes	1	2	1	2	4	2	4	2	2	1	2	1	3	2	4	4	Agree	3	2	3	2	3	3	2	2	1	3	2	3	3	2	3	2	3
61	5	Male	1	Single	1	College/University or Above	4	Housewife/Retired/Unemployed/Other	5	PHP 10,000 or less	1	Urban	2	CAR	No	2	2	1	1	4	2	5	2	2	1	2	1	4	2	4	3	Disagree	2	1	3	2	3	4	2	3	2	4	2	3	3	2	3	2	3
46	3	Male	1	Single	1	College/University or Above	4	Professional/White Collar Worker	2	PHP 10,000 to 20,000	2	Urban	2	Region VI	No	2	2	1	1	4	2	5	2	3	2	2	1	4	2	4	1	Disagree	2	1	3	2	4	3	2	2	1	2	1	4	4	2	4	2	2
24	1	Female	2	Single	1	College/University or Above	4	Student	4	PHP 10,000 to 20,000	2	Rural	1	Region I	No	2	2	1	2	5	3	5	2	1	1	2	1	3	2	4	2	Strongly Disagree	1	1	3	2	3	4	2	2	1	3	2	3	3	2	4	2	1
70	5	Female	2	Single	1	College/University or Above	4	Housewife/Retired/Unemployed/Other	5	PHP 20,000 to 100,000	3	Urban	2	NCR	No	2	2	1	2	4	2	5	2	1	1	1	1	3	2	4	1	Disagree	2	1	2	1	2	4	2	3	2	3	2	3	3	2	3	2	2
41	3	Male	1	Married	2	College/University or Above	4	Professional/White Collar Worker	2	PHP 20,000 to 100,000	3	Urban	2	NCR	Yes	1	2	1	2	4	2	5	2	3	2	3	2	3	2	4	1	Disagree	2	1	3	2	3	4	2	3	2	3	2	3	3	2	3	2	2
20	1	Female	2	Single	1	College/University or Above	4	Student	4	PHP 10,000 or less	1	Urban	2	NCR	No	2	2	1	2	5	3	5	2	2	1	3	2	4	2	4	5	Agree	3	2	4	2	4	4	2	4	2	4	2	4	4	2	4	2	1
50	3	Female	2	Married	2	College/University or Above	4	Professional/White Collar Worker	2	PHP 100,000 or more	4	Urban	2	Region III	No	2	2	1	2	5	3	5	2	1	1	1	1	4	2	4	1	Disagree	2	1	3	2	3	4	2	2	1	3	2	3	3	2	4	2	3
60	4	Male	1	Married	2	College/University or Above	4	Self-employed	3	PHP 100,000 or more	4	Urban	2	Region VII	No	2	2	1	1	5	3	5	2	2	1	2	1	3	2	4	2	Agree	3	2	3	2	3	4	2	2	1	3	2	4	3	2	4	2	3
57	4	Male	1	Married	2	College/University or Above	4	Self-employed	3	PHP 20,000 to 100,000	3	Urban	2	Region IV-A	No	2	2	1	2	5	3	5	2	1	1	2	1	4	2	4	1	Disagree	2	1	2	1	2	3	2	3	2	3	2	3	3	2	3	2	3
71	5	Male	1	Married	2	College/University or Above	4	Professional/White Collar Worker	2	PHP 100,000 or more	4	Urban	2	NCR	Yes	1	2	1	1	3	1	4	2	1	1	1	1	3	2	4	1	Agree	3	2	3	2	3	4	2	4	2	4	2	3	4	2	3	2	3
40	2	Female	2	Single	1	College/University or Above	4	Self-employed	3	PHP 10,000 or less	1	Urban	2	Region VI	No	2	2	1	2	4	2	5	2	1	1	2	1	4	2	4	3	Agree	3	2	4	2	4	4	2	4	2	4	2	4	4	2	4	2	3
57	4	Female	2	Married	2	College/University or Above	4	Professional/White Collar Worker	2	PHP 100,000 or more	4	Urban	2	NCR	No	2	2	1	1	4	2	5	2	3	2	3	2	3	2	1	4	Agree	3	2	4	2	4	4	2	3	2	4	2	4	4	2	4	2	2
27	1	Female	2	Single	1	College/University or Above	4	Student	4	PHP 10,000 to 20,000	2	Urban	2	NCR	No	2	2	2	2	3	1	4	2	2	1	2	1	3	2	1	3	Agree	3	2	2	1	3	3	2	2	1	3	2	4	4	2	4	2	3
30	1	Female	2	Single	1	College/University or Above	4	Professional/White Collar Worker	2	PHP 20,000 to 100,000	3	Urban	2	NCR	No	2	1	1	2	4	2	4	2	2	1	2	1	3	2	4	4	Agree	3	2	3	2	4	4	2	3	2	4	2	4	3	2	3	2	3
71	5	Female	2	Single	1	College/University or Above	4	Housewife/Retired/Unemployed/Other	5	PHP 100,000 or more	4	Urban	2	Region VI	No	2	2	1	2	4	2	5	2	3	2	2	1	3	2	4	5	Agree	3	2	3	2	3	4	2	3	2	3	2	3	3	2	3	2	3
36	2	Male	1	Married	2	College/University or Above	4	Professional/White Collar Worker	2	PHP 100,000 or more	4	Urban	2	NCR	Yes	1	2	2	2	3	1	5	2	4	2	4	2	4	2	1	1	Disagree	2	1	2	1	3	2	1	2	1	2	1	3	4	2	4	2	2
28	1	Female	2	Married	2	College/University or Above	4	Professional/White Collar Worker	2	PHP 10,000 to 20,000	2	Urban	2	NCR	No	2	2	1	2	4	2	4	2	2	1	3	2	4	2	4	3	Strongly Agree	4	2	4	2	4	3	2	2	1	2	1	4	3	2	3	2	3
19	1	Female	2	Single	1	College/University or Above	4	Student	4	PHP 10,000 or less	1	Rural	1	Region IV-A	No	2	2	1	2	3	1	5	2	2	1	3	2	4	2	4	4	Agree	3	2	4	2	4	3	2	3	2	3	2	4	3	2	3	2	2
20	1	Female	2	Single	1	College/University or Above	4	Student	4	PHP 10,000 or less	1	Urban	2	NCR	Yes	1	2	1	2	3	1	2	1	1	1	2	1	3	2	4	1	Disagree	2	1	3	2	3	4	2	3	2	3	2	3	3	2	2	1	3
40	2	Female	2	Single	1	College/University or Above	4	Professional/White Collar Worker	2	PHP 20,000 to 100,000	3	Urban	2	NCR	Yes	1	2	2	2	4	2	4	2	2	1	2	1	3	2	1	3	Agree	3	2	2	1	2	3	2	2	1	2	1	2	3	2	3	2	3
44	3	Female	2	Married	2	College/University or Above	4	Professional/White Collar Worker	2	PHP 20,000 to 100,000	3	Urban	2	Region III	No	2	2	1	2	4	2	4	2	2	1	2	1	3	2	4	2	Disagree	2	1	3	2	2	3	2	2	1	3	2	4	3	2	3	2	4
35	2	Female	2	Single	1	College/University or Above	4	Professional/White Collar Worker	2	PHP 20,000 to 100,000	3	Rural	1	Region IV-A	No	2	2	1	2	5	3	3	1	2	1	2	1	3	2	1	1	Agree	3	2	3	2	3	3	2	2	1	4	2	4	3	2	3	2	3
60	4	Female	2	Married	2	College/University or Above	4	Housewife/Retired/Unemployed/Other	5	PHP 10,000 or less	1	Urban	2	NCR	No	2	2	1	1	4	2	5	2	3	2	3	2	3	2	1	2	Disagree	2	1	3	2	3	4	2	4	2	4	2	4	3	2	3	2	4
28	1	Male	1	Single	1	College/University or Above	4	Professional/White Collar Worker	2	PHP 20,000 to 100,000	3	Urban	2	NCR	Yes	1	2	2	1	4	2	3	1	1	1	2	1	4	2	4	1	Strongly Disagree	1	1	4	2	4	4	2	3	2	3	2	4	3	2	3	2	4
22	1	Female	2	Single	1	College/University or Above	4	Student	4	PHP 10,000 or less	1	Urban	2	NCR	No	2	2	1	2	4	2	5	2	2	1	2	1	3	2	1	4	Disagree	2	1	4	2	4	4	2	3	2	4	2	4	4	2	4	2	3
41	3	Female	2	Single	1	College/University or Above	4	Professional/White Collar Worker	2	PHP 20,000 to 100,000	3	Urban	2	NCR	No	2	2	1	2	4	2	5	2	1	1	2	1	4	2	4	4	Disagree	2	1	3	2	3	4	2	3	2	3	2	3	4	2	4	2	3
53	4	Female	2	Married	2	College/University or Above	4	Professional/White Collar Worker	2	PHP 100,000 or more	4	Urban	2	NCR	No	2	2	1	2	4	2	5	2	3	2	2	1	3	2	1	2	Disagree	2	1	3	2	3	4	2	3	2	4	2	4	3	2	3	2	3
45	3	Male	1	Married	2	College/University or Above	4	Professional/White Collar Worker	2	PHP 20,000 to 100,000	3	Rural	1	NCR	No	2	2	2	2	4	2	4	2	3	2	3	2	3	2	4	4	Disagree	2	1	3	2	3	3	2	3	2	3	2	3	3	2	3	2	3
20	1	Female	2	Single	1	College/University or Above	4	Student	4	PHP 10,000 or less	1	Urban	2	NCR	Yes	1	2	1	2	5	3	5	2	2	1	3	2	3	2	1	4	Strongly Disagree	1	1	3	2	4	4	2	4	2	4	2	4	4	2	4	2	3
32	2	Male	1	Single	1	College/University or Above	4	Professional/White Collar Worker	2	PHP 10,000 to 20,000	2	Urban	2	Region XI	No	2	2	1	2	5	3	5	2	3	2	3	2	3	2	1	1	Strongly Disagree	1	1	3	2	4	4	2	3	2	4	2	4	3	2	3	2	3
57	4	Male	1	Married	2	College/University or Above	4	Housewife/Retired/Unemployed/Other	5	PHP 10,000 to 20,000	2	Urban	2	NCR	Yes	1	1	1	1	3	1	5	2	2	1	3	2	3	2	4	1	Agree	3	2	3	2	4	4	2	3	2	3	2	4	3	2	3	2	3
23	1	Male	1	Single	1	College/University or Above	4	Professional/White Collar Worker	2	PHP 20,000 to 100,000	3	Urban	2	NCR	No	2	2	1	1	2	1	5	2	1	1	2	1	3	2	1	4	Strongly Agree	4	2	3	2	4	3	2	4	2	4	2	4	4	2	4	2	3
42	3	Female	2	Married	2	College/University or Above	4	Professional/White Collar Worker	2	PHP 10,000 to 20,000	2	Rural	1	Region VII	No	2	2	1	2	3	1	3	1	3	2	3	2	3	2	1	2	Agree	3	2	4	2	4	4	2	4	2	4	2	4	3	2	3	2	3
48	3	Male	1	Married	2	College/University or Above	4	Self-employed	3	PHP 100,000 or more	4	Urban	2	Region I	No	2	2	1	1	4	2	5	2	3	2	2	1	3	2	1	4	Agree	3	2	3	2	3	4	2	3	2	3	2	3	4	2	4	2	3
20	1	Female	2	Single	1	College/University or Above	4	Student	4	PHP 20,000 to 100,000	3	Urban	2	NCR	No	2	2	1	2	4	2	5	2	2	1	3	2	3	2	4	4	Strongly Agree	4	2	4	2	4	4	2	4	2	4	2	4	4	2	4	2	3
65	5	Female	2	Single	1	College/University or Above	4	Self-employed	3	PHP 10,000 to 20,000	2	Rural	1	Region VIII	No	2	2	2	2	4	2	5	2	4	2	3	2	2	1	2	2	Agree	3	2	4	2	4	4	2	4	2	4	2	4	4	2	4	2	3
43	3	Male	1	Married	2	College/University or Above	4	Professional/White Collar Worker	2	PHP 20,000 to 100,000	3	Urban	2	Region VI	No	2	2	1	2	5	3	5	2	3	2	3	2	3	2	1	4	Agree	3	2	4	2	4	4	2	3	2	4	2	4	3	2	3	2	3
24	1	Male	1	Single	1	College/University or Above	4	Professional/White Collar Worker	2	PHP 20,000 to 100,000	3	Rural	1	Region IV-A	No	2	2	2	2	5	3	5	2	1	1	4	2	4	2	1	3	Agree	3	2	4	2	4	4	2	3	2	4	2	4	4	2	4	2	3
54	4	Female	2	Single	1	College/University or Above	4	Professional/White Collar Worker	2	PHP 100,000 or more	4	Urban	2	NCR	No	2	2	1	2	4	2	5	2	1	1	2	1	3	2	1	1	Disagree	2	1	4	2	4	4	2	4	2	4	2	4	3	2	3	2	4
40	2	Female	2	Married	2	College/University or Above	4	Professional/White Collar Worker	2	PHP 20,000 to 100,000	3	Urban	2	NCR	No	2	2	2	2	5	3	1	1	2	1	3	2	3	2	1	2	Strongly Agree	4	2	4	2	4	4	2	3	2	4	2	4	2	1	2	1	3
59	4	Female	2	Married	2	College/University or Above	4	Housewife/Retired/Unemployed/Other	5	PHP 20,000 to 100,000	3	Urban	2	NCR	No	2	2	1	2	5	3	4	2	2	1	2	1	3	2	4	1	Disagree	2	1	4	2	4	4	2	4	2	4	2	4	3	2	3	2	3
44	3	Female	2	Single	1	College/University or Above	4	Self-employed	3	PHP 10,000 to 20,000	2	Urban	2	Region IV-A	No	2	2	1	1	3	1	2	1	1	1	2	1	2	1	1	3	Agree	3	2	2	1	3	3	2	4	2	1	1	3	2	1	2	1	4
62	5	Male	1	Married	2	College/University or Above	4	Housewife/Retired/Unemployed/Other	5	PHP 10,000 to 20,000	2	Urban	2	NCR	No	2	2	1	1	4	2	1	1	1	1	1	1	1	1	1	3	Disagree	2	1	2	1	3	2	1	2	1	3	2	3	2	1	2	1	4
62	5	Female	2	Married	2	College/University or Above	4	Self-employed	3	PHP 20,000 to 100,000	3	Urban	2	Region IV-A	No	2	1	1	1	4	2	2	1	1	1	1	1	2	1	1	1	Disagree	2	1	3	2	3	3	2	2	1	4	2	4	1	1	2	1	4
66	5	Female	2	Single	1	College/University or Above	4	Professional/White Collar Worker	2	PHP 20,000 to 100,000	3	Urban	2	NCR	Yes	1	2	1	1	3	1	2	1	1	1	2	1	2	1	1	1	Disagree	2	1	3	2	3	3	2	4	2	3	2	3	2	1	2	1	4
63	5	Female	2	Single	1	College/University or Above	4	Self-employed	3	PHP 20,000 to 100,000	3	Urban	2	Region III	No	2	2	1	2	4	2	1	1	1	1	1	1	2	1	1	1	Strongly Disagree	1	1	3	2	4	4	2	3	2	4	2	4	2	1	1	1	4
20	1	Female	2	Single	1	College/University or Above	4	Student	4	PHP 10,000 to 20,000	2	Urban	2	Region II	No	2	2	2	2	4	2	1	1	1	1	2	1	2	1	1	1	Strongly Disagree	1	1	4	2	4	3	2	3	2	3	2	4	2	1	1	1	4
51	4	Female	2	Married	2	College/University or Above	4	Professional/White Collar Worker	2	PHP 20,000 to 100,000	3	Urban	2	NCR	Yes	1	2	2	2	4	2	2	1	2	1	2	1	2	1	1	3	Disagree	2	1	3	2	4	4	2	4	2	4	2	4	2	1	2	1	3
53	4	Female	2	Married	2	College/University or Above	4	Professional/White Collar Worker	2	PHP 100,000 or more	4	Urban	2	BARMM	No	2	2	1	2	5	3	1	1	2	1	2	1	3	2	4	2	Disagree	2	1	3	2	3	3	2	2	1	3	2	3	3	2	2	1	4
82	5	Female	2	Single	1	College/University or Above	4	Housewife/Retired/Unemployed/Other	5	PHP 100,000 or more	4	Urban	2	NCR	No	2	2	1	2	4	2	3	1	1	1	2	1	3	2	4	2	Strongly Disagree	1	1	1	1	1	4	2	2	1	2	1	2	3	2	3	2	3
40	2	Female	2	Single	1	College/University or Above	4	Blue Collar Worker	1	PHP 20,000 to 100,000	3	Urban	2	Region VII	No	2	2	2	2	5	3	4	2	3	2	3	2	3	2	4	1	Disagree	2	1	2	1	2	3	2	2	1	2	1	2	3	2	3	2	3
44	3	Female	2	Married	2	College/University or Above	4	Professional/White Collar Worker	2	PHP 100,000 or more	4	Urban	2	NCR	No	2	2	1	2	4	2	1	1	1	1	3	2	3	2	1	1	Disagree	2	1	3	2	3	3	2	2	1	3	2	3	3	2	3	2	4
25	1	Male	1	Single	1	College/University or Above	4	Student	4	PHP 10,000 or less	1	Urban	2	NCR	Yes	1	2	1	2	5	3	4	2	2	1	3	2	3	2	4	2	Disagree	2	1	4	2	4	3	2	2	1	3	2	4	3	2	3	2	3
20	1	Female	2	Single	1	College/University or Above	4	Student	4	PHP 10,000 or less	1	Urban	2	NCR	No	2	2	2	2	3	1	5	2	3	2	3	2	4	2	4	4	Agree	3	2	4	2	4	3	2	2	1	3	2	3	3	2	3	2	3
50	3	Male	1	Married	2	College/University or Above	4	Professional/White Collar Worker	2	PHP 20,000 to 100,000	3	Urban	2	NCR	Yes	1	2	1	1	4	2	5	2	3	2	2	1	3	2	1	3	Strongly Agree	4	2	2	1	3	4	2	3	2	4	2	4	3	2	3	2	3
68	5	Male	1	Married	2	College/University or Above	4	Professional/White Collar Worker	2	PHP 100,000 or more	4	Rural	1	Region IV-A	No	2	2	1	2	4	2	5	2	2	1	2	1	4	2	4	1	Disagree	2	1	3	2	3	4	2	3	2	4	2	4	4	2	3	2	3
28	1	Female	2	Single	1	College/University or Above	4	Professional/White Collar Worker	2	PHP 20,000 to 100,000	3	Urban	2	NCR	Yes	1	2	2	2	4	2	4	2	1	1	1	1	3	2	4	4	Agree	3	2	4	2	4	4	2	3	2	4	2	4	3	2	3	2	2
19	1	Female	2	Single	1	College/University or Above	4	Student	4	PHP 10,000 or less	1	Rural	1	Region IV-A	No	2	2	1	2	3	1	1	1	1	1	1	1	1	1	1	1	Strongly Disagree	1	1	1	1	1	4	2	4	2	4	2	4	1	1	1	1	4
42	3	Female	2	Married	2	College/University or Above	4	Professional/White Collar Worker	2	PHP 20,000 to 100,000	3	Urban	2	NCR	No	2	1	1	2	4	2	2	1	2	1	2	1	2	1	1	1	Disagree	2	1	3	2	4	3	2	2	1	3	2	4	3	2	3	2	3
76	5	Female	2	Married	2	College/University or Above	4	Housewife/Retired/Unemployed/Other	5	PHP 10,000 or less	1	Rural	1	Region III	No	2	2	2	1	4	2	1	1	1	1	1	1	2	1	1	1	Agree	3	2	3	2	3	3	2	3	2	3	2	3	3	2	3	2	3
37	2	Male	1	Single	1	College/University or Above	4	Housewife/Retired/Unemployed/Other	5	PHP 10,000 or less	1	Urban	2	Region V	No	2	2	2	2	5	3	3	1	2	1	2	1	2	1	1	1	Strongly Disagree	1	1	1	1	1	1	1	1	1	1	1	1	1	1	1	1	1
21	1	Female	2	Single	1	College/University or Above	4	Student	4	PHP 10,000 or less	1	Urban	2	NCR	Yes	1	2	2	2	4	2	1	1	1	1	1	1	1	1	1	4	Strongly Disagree	1	1	3	2	4	4	2	3	2	4	2	4	4	2	4	2	1
28	1	Male	1	Married	2	College/University or Above	4	Professional/White Collar Worker	2	PHP 100,000 or more	4	Urban	2	Region III	No	2	2	1	2	4	2	5	2	2	1	2	1	3	2	1	1	Strongly Agree	4	2	4	2	4	4	2	4	2	4	2	4	4	2	4	2	2
21	1	Female	2	Single	1	College/University or Above	4	Student	4	PHP 100,000 or more	4	Urban	2	NCR	No	2	2	1	2	4	2	5	2	1	1	2	1	3	2	1	4	Agree	3	2	4	2	4	4	2	4	2	4	2	4	4	2	3	2	2
32	2	Female	2	Single	1	College/University or Above	4	Professional/White Collar Worker	2	PHP 10,000 to 20,000	2	Urban	2	Region IV-A	No	2	1	1	2	5	3	2	1	1	1	1	1	1	1	1	1	Agree	3	2	2	1	2	1	1	2	1	1	1	1	1	1	1	1	4
48	3	Female	2	Married	2	College/University or Above	4	Professional/White Collar Worker	2	PHP 20,000 to 100,000	3	Urban	2	NCR	Yes	1	2	1	2	4	2	1	1	1	1	1	1	1	1	1	1	Strongly Disagree	1	1	1	1	1	4	2	2	1	2	1	2	1	1	1	1	4
21	1	Female	2	Single	1	College/University or Above	4	Student	4	PHP 10,000 or less	1	Rural	1	Region IV-A	No	2	2	2	2	4	2	2	1	2	1	2	1	3	2	4	1	Strongly Disagree	1	1	2	1	2	3	2	2	1	2	1	2	2	1	2	1	3
69	5	Female	2	Married	2	College/University or Above	4	Housewife/Retired/Unemployed/Other	5	PHP 20,000 to 100,000	3	Urban	2	NCR	No	2	2	1	2	5	3	1	1	1	1	1	1	1	1	4	1	Strongly Disagree	1	1	1	1	1	3	2	1	1	1	1	1	1	1	1	1	4
35	2	Female	2	Married	2	College/University or Above	4	Housewife/Retired/Unemployed/Other	5	PHP 10,000 to 20,000	2	Urban	2	NCR	No	2	2	1	2	4	2	2	1	2	1	2	1	2	1	1	1	Disagree	2	1	2	1	3	3	2	4	2	2	1	4	1	1	1	1	4
19	1	Female	2	Single	1	College/University or Above	4	Student	4	PHP 10,000 or less	1	Urban	2	NCR	No	2	2	2	2	5	3	1	1	1	1	1	1	1	1	1	1	Strongly Disagree	1	1	1	1	1	4	2	4	2	1	1	1	1	1	1	1	4
60	4	Female	2	Married	2	College/University or Above	4	Self-employed	3	PHP 10,000 to 20,000	2	Urban	2	NCR	No	2	2	1	2	5	3	2	1	1	1	1	1	1	1	1	1	Strongly Disagree	1	1	2	1	2	2	1	2	1	4	2	3	2	1	2	1	4
20	1	Female	2	Single	1	College/University or Above	4	Student	4	PHP 10,000 or less	1	Urban	2	Region VII	No	2	2	1	2	5	3	2	1	2	1	2	1	3	2	1	3	Strongly Disagree	1	1	4	2	4	3	2	2	1	4	2	4	2	1	2	1	4
30	1	Female	2	Single	1	College/University or Above	4	Professional/White Collar Worker	2	PHP 20,000 to 100,000	3	Urban	2	NCR	Yes	1	2	2	2	4	2	1	1	2	1	2	1	3	2	4	2	Agree	3	2	3	2	3	3	2	2	1	3	2	3	2	1	2	1	4
67	5	Male	1	Single	1	College/University or Above	4	Professional/White Collar Worker	2	PHP 10,000 to 20,000	2	Urban	2	NCR	No	2	2	1	1	3	1	1	1	2	1	3	2	2	1	1	1	Disagree	2	1	2	1	2	4	2	4	2	3	2	4	2	1	2	1	4
69	5	Female	2	Single	1	College/University or Above	4	Self-employed	3	PHP 20,000 to 100,000	3	Urban	2	BARMM	No	2	1	1	1	4	2	2	1	2	1	2	1	2	1	4	1	Disagree	2	1	2	1	2	4	2	4	2	3	2	3	2	1	2	1	3
29	1	Female	2	Single	1	College/University or Above	4	Professional/White Collar Worker	2	PHP 20,000 to 100,000	3	Urban	2	NCR	No	2	2	1	2	4	2	1	1	1	1	1	1	1	1	1	1	Strongly Disagree	1	1	2	1	4	3	2	4	2	3	2	4	2	1	2	1	4
41	3	Female	2	Married	2	College/University or Above	4	Housewife/Retired/Unemployed/Other	5	PHP 10,000 or less	1	Rural	1	Region VI	No	2	2	1	1	4	2	3	1	2	1	2	1	3	2	1	2	Disagree	2	1	3	2	3	3	2	3	2	4	2	4	2	1	2	1	3
43	3	Female	2	Married	2	College/University or Above	4	Self-employed	3	PHP 20,000 to 100,000	3	Urban	2	Region VI	No	2	2	1	2	5	3	1	1	1	1	2	1	2	1	1	1	Strongly Disagree	1	1	4	2	4	4	2	4	2	4	2	4	1	1	1	1	4
48	3	Female	2	Married	2	College/University or Above	4	Professional/White Collar Worker	2	PHP 20,000 to 100,000	3	Urban	2	NCR	Yes	1	2	1	2	4	2	3	1	1	1	1	1	2	1	1	3	Agree	3	2	3	2	3	3	2	3	2	4	2	4	2	1	2	1	4
60	4	Female	2	Married	2	College/University or Above	4	Housewife/Retired/Unemployed/Other	5	PHP 100,000 or more	4	Urban	2	NCR	No	2	2	2	2	4	2	4	2	1	1	3	2	3	2	4	1	Agree	3	2	4	2	4	4	2	4	2	4	2	4	2	1	2	1	4
21	1	Female	2	Single	1	College/University or Above	4	Student	4	PHP 10,000 or less	1	Rural	1	Region VII	No	2	2	1	2	4	2	3	1	2	1	2	1	3	2	1	2	Strongly Disagree	1	1	4	2	4	4	2	3	2	4	2	4	3	2	2	1	4
41	3	Female	2	Married	2	College/University or Above	4	Housewife/Retired/Unemployed/Other	5	PHP 10,000 to 20,000	2	Urban	2	Region IV-A	No	2	2	1	2	4	2	4	2	1	1	2	1	3	2	4	1	Strongly Disagree	1	1	4	2	4	4	2	3	2	4	2	4	3	2	2	1	3
41	3	Female	2	Single	1	College/University or Above	4	Professional/White Collar Worker	2	PHP 20,000 to 100,000	3	Urban	2	NCR	No	2	2	1	2	4	2	4	2	2	1	2	1	3	2	4	1	Disagree	2	1	4	2	4	4	2	3	2	4	2	4	3	2	2	1	4
50	3	Female	2	Married	2	College/University or Above	4	Professional/White Collar Worker	2	PHP 20,000 to 100,000	3	Urban	2	Region VII	No	2	2	1	2	5	3	2	1	2	1	2	1	2	1	1	2	Disagree	2	1	3	2	3	4	2	3	2	4	2	4	3	2	2	1	4
34	2	Female	2	Married	2	College/University or Above	4	Professional/White Collar Worker	2	PHP 10,000 to 20,000	2	Urban	2	Region IV-A	No	2	2	1	2	5	3	4	2	3	2	3	2	3	2	1	3	Agree	3	2	4	2	4	4	2	4	2	4	2	4	3	2	2	1	4
54	4	Male	1	Married	2	College/University or Above	4	Professional/White Collar Worker	2	PHP 100,000 or more	4	Urban	2	NCR	No	2	1	1	2	5	3	4	2	1	1	2	1	3	2	4	3	Agree	3	2	3	2	3	3	2	2	1	3	2	3	2	1	3	2	3
41	3	Female	2	Married	2	College/University or Above	4	Self-employed	3	PHP 10,000 to 20,000	2	Urban	2	NCR	No	2	2	1	2	4	2	1	1	1	1	2	1	2	1	1	1	Disagree	2	1	1	1	1	4	2	3	2	3	2	3	2	1	3	2	4
52	4	Female	2	Single	1	College/University or Above	4	Professional/White Collar Worker	2	PHP 20,000 to 100,000	3	Urban	2	NCR	No	2	2	2	2	5	3	1	1	2	1	2	1	3	2	4	1	Strongly Disagree	1	1	2	1	3	3	2	3	2	3	2	3	2	1	3	2	4
30	1	Female	2	Single	1	College/University or Above	4	Professional/White Collar Worker	2	PHP 10,000 to 20,000	2	Urban	2	Region VII	No	2	2	1	2	5	3	3	1	2	1	2	1	3	2	1	1	Disagree	2	1	3	2	3	4	2	2	1	2	1	2	3	2	3	2	3
28	1	Female	2	Single	1	College/University or Above	4	Professional/White Collar Worker	2	PHP 20,000 to 100,000	3	Rural	1	Region II	No	2	2	1	2	4	2	5	2	1	1	1	1	4	2	1	1	Strongly Disagree	1	1	2	1	4	3	2	1	1	3	2	4	4	2	4	2	3
48	3	Male	1	Single	1	College/University or Above	4	Professional/White Collar Worker	2	PHP 20,000 to 100,000	3	Rural	1	Region IV-A	No	2	2	1	2	4	2	5	2	2	1	3	2	3	2	1	4	Disagree	2	1	2	1	2	4	2	2	1	4	2	4	3	2	3	2	3
19	1	Female	2	Single	1	College/University or Above	4	Student	4	PHP 10,000 or less	1	Urban	2	NCR	No	2	2	1	2	5	3	3	1	1	1	1	1	3	2	4	1	Strongly Disagree	1	1	1	1	1	3	2	1	1	4	2	4	3	2	3	2	3
24	1	Male	1	Single	1	College/University or Above	4	Self-employed	3	PHP 10,000 to 20,000	2	Urban	2	NCR	No	2	2	1	2	4	2	3	1	1	1	1	1	3	2	4	1	Disagree	2	1	4	2	4	4	2	2	1	3	2	4	3	2	3	2	4
43	3	Female	2	Married	2	College/University or Above	4	Professional/White Collar Worker	2	PHP 10,000 to 20,000	2	Rural	1	Region VII	No	2	2	1	2	5	3	3	1	2	1	2	1	2	1	1	1	Disagree	2	1	4	2	4	3	2	2	1	3	2	4	3	2	3	2	3
22	1	Male	1	Single	1	College/University or Above	4	Professional/White Collar Worker	2	PHP 20,000 to 100,000	3	Rural	1	Region X	No	2	2	1	2	5	3	4	2	3	2	3	2	3	2	1	2	Disagree	2	1	3	2	3	3	2	2	1	3	2	3	3	2	3	2	3
48	3	Female	2	Married	2	College/University or Above	4	Professional/White Collar Worker	2	PHP 20,000 to 100,000	3	Urban	2	Region X	No	2	2	1	2	5	3	3	1	2	1	2	1	2	1	1	1	Strongly Disagree	1	1	3	2	3	3	2	2	1	3	2	3	3	2	3	2	3
21	1	Male	1	Single	1	College/University or Above	4	Student	4	PHP 10,000 or less	1	Urban	2	NCR	No	2	2	1	2	5	3	2	1	1	1	1	1	1	1	1	3	Strongly Disagree	1	1	1	1	1	4	2	3	2	4	2	4	4	2	3	2	4
74	5	Male	1	Married	2	College/University or Above	4	Housewife/Retired/Unemployed/Other	5	PHP 20,000 to 100,000	3	Urban	2	Region VII	No	2	2	1	1	3	1	4	2	1	1	1	1	4	2	4	1	Disagree	2	1	3	2	3	4	2	3	2	4	2	4	3	2	3	2	3
51	4	Female	2	Single	1	College/University or Above	4	Professional/White Collar Worker	2	PHP 10,000 to 20,000	2	Rural	1	Region IV-A	No	2	2	2	2	3	1	4	2	3	2	3	2	3	2	1	2	Disagree	2	1	3	2	3	3	2	3	2	3	2	3	3	2	3	2	4
75	5	Male	1	Married	2	College/University or Above	4	Self-employed	3	PHP 100,000 or more	4	Urban	2	NCR	No	2	2	1	1	4	2	4	2	2	1	2	1	3	2	4	3	Disagree	2	1	3	2	3	3	2	3	2	3	2	3	3	2	4	2	3
43	3	Female	2	Single	1	College/University or Above	4	Professional/White Collar Worker	2	PHP 10,000 to 20,000	2	Rural	1	Region VI	No	2	2	1	2	4	2	2	1	2	1	2	1	2	1	1	1	Strongly Disagree	1	1	3	2	3	4	2	3	2	3	2	3	3	2	3	2	4
62	5	Female	2	Married	2	College/University or Above	4	Professional/White Collar Worker	2	PHP 100,000 or more	4	Rural	1	Region IV-A	Yes	1	2	1	2	4	2	3	1	2	1	2	1	3	2	4	1	Disagree	2	1	3	2	3	3	2	3	2	3	2	3	3	2	3	2	3
24	1	Female	2	Single	1	College/University or Above	4	Professional/White Collar Worker	2	PHP 10,000 to 20,000	2	Urban	2	Region IV-A	No	2	2	1	2	4	2	3	1	2	1	2	1	2	1	1	2	Disagree	2	1	3	2	3	3	2	3	2	3	2	3	3	2	3	2	3
40	2	Female	2	Single	1	College/University or Above	4	Professional/White Collar Worker	2	PHP 20,000 to 100,000	3	Urban	2	Region VII	No	2	2	1	2	4	2	2	1	2	1	3	2	3	2	4	1	Strongly Disagree	1	1	3	2	4	4	2	4	2	4	2	4	3	2	3	2	4
57	4	Female	2	Married	2	College/University or Above	4	Professional/White Collar Worker	2	PHP 20,000 to 100,000	3	Urban	2	NCR	No	2	2	1	2	4	2	5	2	3	2	3	2	3	2	1	1	Disagree	2	1	3	2	3	4	2	3	2	4	2	4	3	2	3	2	3
19	1	Female	2	Single	1	College/University or Above	4	Student	4	PHP 20,000 to 100,000	3	Urban	2	NCR	Yes	1	2	1	2	4	2	3	1	1	1	3	2	3	2	4	3	Strongly Disagree	1	1	3	2	3	4	2	3	2	4	2	4	3	2	3	2	4
19	1	Female	2	Single	1	College/University or Above	4	Student	4	PHP 10,000 or less	1	Urban	2	NCR	Yes	1	2	2	2	4	2	4	2	2	1	3	2	3	2	4	2	Disagree	2	1	4	2	4	4	2	4	2	4	2	4	4	2	3	2	3
28	1	Female	2	Single	1	College/University or Above	4	Student	4	PHP 10,000 or less	1	Urban	2	Region II	No	2	2	2	2	4	2	3	1	2	1	2	1	2	1	1	2	Disagree	2	1	3	2	3	3	2	3	2	3	2	3	3	2	3	2	4
28	1	Female	2	Married	2	College/University or Above	4	Professional/White Collar Worker	2	PHP 10,000 or less	1	Rural	1	Region III	No	2	2	1	2	5	3	3	1	3	2	3	2	4	2	1	3	Disagree	2	1	3	2	3	4	2	3	2	4	2	4	3	2	4	2	4
23	1	Female	2	Single	1	College/University or Above	4	Professional/White Collar Worker	2	PHP 10,000 or less	1	Rural	1	Region III	No	2	2	2	2	5	3	4	2	3	2	3	2	3	2	1	1	Disagree	2	1	3	2	3	4	2	3	2	4	2	4	3	2	3	2	3
54	4	Male	1	Married	2	College/University or Above	4	Professional/White Collar Worker	2	PHP 20,000 to 100,000	3	Urban	2	Region III	No	2	2	1	1	2	1	5	2	3	2	3	2	4	2	4	2	Agree	3	2	3	2	3	4	2	4	2	4	2	4	4	2	4	2	3
66	5	Female	2	Married	2	College/University or Above	4	Professional/White Collar Worker	2	PHP 20,000 to 100,000	3	Urban	2	Region IV-A	No	2	2	2	1	3	1	4	2	2	1	2	1	3	2	4	2	Agree	3	2	4	2	4	4	2	4	2	4	2	4	4	2	4	2	4
58	4	Female	2	Single	1	College/University or Above	4	Professional/White Collar Worker	2	PHP 20,000 to 100,000	3	Urban	2	Region VI	No	2	2	1	2	3	1	5	2	1	1	1	1	4	2	4	1	Strongly Agree	4	2	3	2	4	4	2	3	2	3	2	3	4	2	3	2	3
44	3	Female	2	Married	2	College/University or Above	4	Professional/White Collar Worker	2	PHP 20,000 to 100,000	3	Urban	2	NCR	No	2	2	1	2	3	1	5	2	3	2	3	2	3	2	1	2	Agree	3	2	4	2	4	4	2	4	2	4	2	4	3	2	3	2	3
46	3	Female	2	Married	2	College/University or Above	4	Professional/White Collar Worker	2	PHP 20,000 to 100,000	3	Urban	2	Region IV-A	No	2	1	1	1	4	2	5	2	3	2	2	1	3	2	1	3	Strongly Agree	4	2	4	2	4	3	2	3	2	4	2	4	3	2	3	2	3
63	5	Female	2	Single	1	College/University or Above	4	Professional/White Collar Worker	2	PHP 20,000 to 100,000	3	Urban	2	Region XI	No	2	2	1	1	4	2	5	2	3	2	2	1	3	2	4	3	Agree	3	2	4	2	4	4	2	4	2	4	2	4	4	2	4	2	4
48	3	Female	2	Married	2	College/University or Above	4	Professional/White Collar Worker	2	PHP 20,000 to 100,000	3	Urban	2	Region III	No	2	2	1	1	4	2	5	2	3	2	3	2	3	2	1	1	Strongly Agree	4	2	4	2	4	4	2	4	2	4	2	4	4	2	4	2	4
58	4	Female	2	Married	2	College/University or Above	4	Housewife/Retired/Unemployed/Other	5	PHP 20,000 to 100,000	3	Urban	2	NCR	Yes	1	2	1	1	4	2	5	2	1	1	1	1	4	2	4	5	Agree	3	2	4	2	4	4	2	3	2	4	2	4	3	2	3	2	3
63	5	Female	2	Married	2	College/University or Above	4	Housewife/Retired/Unemployed/Other	5	PHP 20,000 to 100,000	3	Urban	2	NCR	No	2	2	1	1	4	2	5	2	1	1	1	1	3	2	4	1	Agree	3	2	4	2	4	4	2	4	2	4	2	4	3	2	3	2	3
52	4	Female	2	Married	2	College/University or Above	4	Professional/White Collar Worker	2	PHP 100,000 or more	4	Urban	2	NCR	Yes	1	2	1	1	4	2	3	1	2	1	3	2	3	2	1	3	Agree	3	2	4	2	4	4	2	3	2	4	2	4	3	2	3	2	4
55	4	Male	1	Married	2	College/University or Above	4	Professional/White Collar Worker	2	PHP 100,000 or more	4	Urban	2	NCR	Yes	1	2	1	1	4	2	5	2	3	2	3	2	3	2	1	4	Agree	3	2	4	2	4	4	2	4	2	4	2	4	3	2	3	2	3
69	5	Female	2	Married	2	College/University or Above	4	Housewife/Retired/Unemployed/Other	5	PHP 100,000 or more	4	Urban	2	NCR	Yes	1	2	1	1	4	2	5	2	3	2	3	2	4	2	1	2	Agree	3	2	4	2	4	4	2	4	2	4	2	4	4	2	4	2	4
29	1	Male	1	Single	1	College/University or Above	4	Professional/White Collar Worker	2	PHP 20,000 to 100,000	3	Urban	2	Region IV-A	No	2	1	1	2	4	2	4	2	1	1	3	2	4	2	1	3	Strongly Agree	4	2	4	2	4	4	2	4	2	4	2	4	3	2	3	2	3
59	4	Male	1	Single	1	College/University or Above	4	Self-employed	3	PHP 20,000 to 100,000	3	Rural	1	Region II	No	2	2	1	2	4	2	4	2	2	1	2	1	3	2	1	1	Agree	3	2	3	2	3	3	2	3	2	4	2	4	4	2	4	2	4
49	3	Female	2	Married	2	College/University or Above	4	Professional/White Collar Worker	2	PHP 20,000 to 100,000	3	Urban	2	NCR	Yes	1	2	1	2	4	2	5	2	1	1	2	1	4	2	4	1	Agree	3	2	4	2	4	4	2	3	2	4	2	4	3	2	3	2	3
71	5	Female	2	Single	1	College/University or Above	4	Housewife/Retired/Unemployed/Other	5	PHP 20,000 to 100,000	3	Urban	2	NCR	No	2	2	1	2	4	2	4	2	2	1	2	1	3	2	4	3	Agree	3	2	4	2	4	4	2	4	2	4	2	4	3	2	3	2	3
50	3	Female	2	Married	2	College/University or Above	4	Housewife/Retired/Unemployed/Other	5	PHP 10,000 or less	1	Urban	2	Region VII	No	2	2	1	2	5	3	5	2	3	2	3	2	3	2	4	1	Agree	3	2	3	2	3	3	2	3	2	3	2	3	3	2	3	2	3
69	5	Female	2	Single	1	College/University or Above	4	Professional/White Collar Worker	2	PHP 100,000 or more	4	Urban	2	NCR	Yes	1	2	1	2	4	2	4	2	2	1	2	1	3	2	4	4	Strongly Disagree	1	1	3	2	1	4	2	1	1	4	2	4	3	2	4	2	3
70	5	Female	2	Married	2	College/University or Above	4	Housewife/Retired/Unemployed/Other	5	PHP 20,000 to 100,000	3	Urban	2	NCR	Yes	1	2	1	2	5	3	4	2	3	2	3	2	3	2	1	4	Agree	3	2	3	2	3	4	2	2	1	3	2	3	3	2	3	2	3
21	1	Male	1	Single	1	College/University or Above	4	Student	4	PHP 10,000 or less	1	Urban	2	Region III	Yes	1	2	1	2	3	1	4	2	2	1	2	1	3	2	4	3	Agree	3	2	3	2	4	4	2	4	2	3	2	4	4	2	4	2	3
27	1	Female	2	Single	1	College/University or Above	4	Professional/White Collar Worker	2	PHP 20,000 to 100,000	3	Urban	2	NCR	No	2	2	1	2	3	1	4	2	3	2	2	1	3	2	4	1	Disagree	2	1	3	2	3	4	2	3	2	4	2	4	3	2	3	2	3
19	1	Male	1	Single	1	College/University or Above	4	Student	4	PHP 10,000 or less	1	Urban	2	Region VII	No	2	2	2	2	4	2	3	1	2	1	2	1	3	2	1	3	Agree	3	2	3	2	3	3	2	3	2	3	2	3	3	2	3	2	3
23	1	Female	2	Single	1	College/University or Above	4	Professional/White Collar Worker	2	PHP 10,000 to 20,000	2	Urban	2	Region II	No	2	2	2	2	4	2	4	2	2	1	3	2	3	2	4	1	Agree	3	2	3	2	3	3	2	3	2	3	2	3	3	2	4	2	3
61	5	Female	2	Single	1	College/University or Above	4	Professional/White Collar Worker	2	PHP 20,000 to 100,000	3	Urban	2	NCR	No	2	2	1	2	4	2	5	2	3	2	3	2	3	2	1	2	Agree	3	2	3	2	4	4	2	4	2	4	2	4	4	2	4	2	3
25	1	Male	1	Single	1	College/University or Above	4	Student	4	PHP 10,000 or less	1	Urban	2	NCR	Yes	1	2	2	2	4	2	4	2	2	1	2	1	2	1	1	4	Disagree	2	1	4	2	3	3	2	3	2	3	2	3	2	1	3	2	2
20	1	Female	2	Single	1	College/University or Above	4	Student	4	PHP 10,000 or less	1	Urban	2	NCR	No	2	2	2	2	3	1	4	2	1	1	3	2	4	2	1	2	Agree	3	2	3	2	4	4	2	3	2	4	2	4	3	2	3	2	2
20	1	Male	1	Single	1	College/University or Above	4	Student	4	PHP 10,000 or less	1	Urban	2	NCR	Yes	1	2	2	2	5	3	4	2	2	1	2	1	3	2	4	4	Agree	3	2	4	2	4	4	2	3	2	4	2	4	3	2	3	2	2
54	4	Male	1	Married	2	College/University or Above	4	Professional/White Collar Worker	2	PHP 20,000 to 100,000	3	Urban	2	NCR	No	2	2	1	2	4	2	4	2	2	1	2	1	2	1	1	3	Disagree	2	1	3	2	3	4	2	2	1	3	2	3	3	2	2	1	3
35	2	Female	2	Married	2	College/University or Above	4	Professional/White Collar Worker	2	PHP 20,000 to 100,000	3	Urban	2	Region XI	No	2	2	1	2	5	3	4	2	2	1	3	2	3	2	1	1	Disagree	2	1	3	2	3	3	2	3	2	3	2	3	2	1	3	2	4
67	5	Male	1	Married	2	College/University or Above	4	Housewife/Retired/Unemployed/Other	5	PHP 20,000 to 100,000	3	Urban	2	NCR	Yes	1	2	1	2	3	1	5	2	2	1	2	1	3	2	4	4	Agree	3	2	3	2	3	2	1	3	2	4	2	4	3	2	3	2	4
28	1	Female	2	Single	1	College/University or Above	4	Professional/White Collar Worker	2	PHP 20,000 to 100,000	3	Rural	1	Region IV-A	No	2	2	1	2	4	2	4	2	2	1	2	1	3	2	1	1	Strongly Disagree	1	1	2	1	2	4	2	3	2	4	2	3	3	2	3	2	3
51	4	Female	2	Married	2	College/University or Above	4	Professional/White Collar Worker	2	PHP 20,000 to 100,000	3	Urban	2	Region IV-A	No	2	2	1	2	4	2	5	2	3	2	3	2	4	2	4	3	Strongly Disagree	1	1	1	1	4	4	2	4	2	4	2	4	4	2	3	2	3
21	1	Female	2	Single	1	College/University or Above	4	Student	4	PHP 10,000 or less	1	Urban	2	NCR	Yes	1	2	2	2	3	1	5	2	2	1	2	1	3	2	1	3	Disagree	2	1	3	2	3	3	2	3	2	3	2	3	4	2	4	2	3
47	3	Male	1	Married	2	College/University or Above	4	Professional/White Collar Worker	2	PHP 100,000 or more	4	Urban	2	NCR	No	2	1	1	1	5	3	4	2	2	1	2	1	3	2	4	4	Disagree	2	1	4	2	4	4	2	3	2	4	2	4	3	2	3	2	4
26	1	Male	1	Single	1	College/University or Above	4	Professional/White Collar Worker	2	PHP 10,000 or less	1	Urban	2	NCR	Yes	1	2	1	2	5	3	5	2	2	1	2	1	4	2	4	3	Disagree	2	1	4	2	4	4	2	3	2	4	2	4	4	2	4	2	3
20	1	Female	2	Single	1	College/University or Above	4	Student	4	PHP 10,000 or less	1	Urban	2	NCR	No	2	2	2	2	5	3	4	2	1	1	2	1	4	2	4	4	Disagree	2	1	3	2	3	4	2	4	2	4	2	4	4	2	4	2	4
47	3	Female	2	Married	2	College/University or Above	4	Professional/White Collar Worker	2	PHP 10,000 to 20,000	2	Urban	2	Region I	No	2	2	2	2	5	3	3	1	3	2	3	2	3	2	1	3	Disagree	2	1	2	1	2	3	2	2	1	3	2	3	2	1	3	2	3
66	5	Female	2	Married	2	College/University or Above	4	Housewife/Retired/Unemployed/Other	5	PHP 20,000 to 100,000	3	Urban	2	Region IV-A	No	2	2	1	1	4	2	4	2	2	1	2	1	3	2	1	1	Strongly Disagree	1	1	1	1	1	3	2	2	1	4	2	2	3	2	3	2	4
30	1	Female	2	Single	1	College/University or Above	4	Professional/White Collar Worker	2	PHP 10,000 or less	1	Urban	2	Region IX	No	2	2	1	2	5	3	5	2	2	1	4	2	4	2	1	1	Strongly Disagree	1	1	4	2	4	4	2	4	2	4	2	4	4	2	4	2	3
19	1	Male	1	Single	1	College/University or Above	4	Student	4	PHP 20,000 to 100,000	3	Rural	1	Region III	No	2	2	2	2	4	2	4	2	2	1	2	1	3	2	4	3	Disagree	2	1	4	2	4	4	2	4	2	4	2	4	3	2	3	2	3
19	1	Female	2	Single	1	College/University or Above	4	Student	4	PHP 20,000 to 100,000	3	Urban	2	Region IV-A	No	2	2	2	2	5	3	5	2	2	1	3	2	4	2	4	3	Strongly Disagree	1	1	4	2	4	4	2	4	2	4	2	4	4	2	4	2	4
25	1	Male	1	Single	1	College/University or Above	4	Professional/White Collar Worker	2	PHP 10,000 to 20,000	2	Urban	2	NCR	No	2	2	1	2	4	2	3	1	2	1	3	2	3	2	1	2	Disagree	2	1	2	1	4	3	2	2	1	3	2	4	2	1	3	2	3
54	4	Female	2	Single	1	College/University or Above	4	Professional/White Collar Worker	2	PHP 10,000 to 20,000	2	Rural	1	Region III	No	2	2	1	2	4	2	5	2	2	1	2	1	3	2	1	2	Disagree	2	1	2	1	2	4	2	2	1	3	2	3	4	2	4	2	4
58	4	Female	2	Married	2	College/University or Above	4	Professional/White Collar Worker	2	PHP 10,000 to 20,000	2	Rural	1	Region VII	No	2	2	1	2	4	2	3	1	2	1	2	1	2	1	1	2	Strongly Disagree	1	1	3	2	3	4	2	3	2	3	2	3	3	2	3	2	3
63	5	Male	1	Married	2	College/University or Above	4	Housewife/Retired/Unemployed/Other	5	PHP 10,000 or less	1	Urban	2	NCR	No	2	2	1	1	4	2	4	2	2	1	2	1	3	2	4	3	Strongly Disagree	1	1	1	1	1	4	2	2	1	3	2	1	3	2	3	2	3
53	4	Female	2	Married	2	College/University or Above	4	Self-employed	3	PHP 20,000 to 100,000	3	Urban	2	NCR	No	2	2	2	2	4	2	5	2	1	1	1	1	4	2	4	1	Disagree	2	1	3	2	3	4	2	3	2	3	2	3	4	2	4	2	2
64	5	Male	1	Married	2	College/University or Above	4	Professional/White Collar Worker	2	PHP 20,000 to 100,000	3	Urban	2	NCR	Yes	1	2	1	1	3	1	3	1	3	2	3	2	3	2	1	3	Disagree	2	1	2	1	2	3	2	3	2	2	1	2	3	2	3	2	3
62	5	Female	2	Married	2	College/University or Above	4	Self-employed	3	PHP 100,000 or more	4	Urban	2	NCR	No	2	2	1	2	4	2	3	1	1	1	2	1	4	2	4	2	Strongly Disagree	1	1	3	2	3	3	2	2	1	3	2	3	3	2	3	2	4
21	1	Male	1	Single	1	College/University or Above	4	Student	4	PHP 10,000 or less	1	Urban	2	NCR	No	2	2	2	2	4	2	5	2	2	1	3	2	4	2	4	4	Disagree	2	1	2	1	3	4	2	3	2	4	2	4	3	2	3	2	3
19	1	Female	2	Single	1	College/University or Above	4	Student	4	PHP 10,000 or less	1	Rural	1	Region II	No	2	2	1	2	3	1	5	2	1	1	4	2	4	2	3	4	Strongly Disagree	1	1	4	2	4	4	2	4	2	4	2	4	4	2	4	2	3
43	3	Female	2	Married	2	College/University or Above	4	Professional/White Collar Worker	2	PHP 100,000 or more	4	Urban	2	Region VII	No	2	2	1	2	5	3	4	2	3	2	2	1	3	2	1	4	Disagree	2	1	3	2	4	4	2	3	2	3	2	4	3	2	3	2	4
26	1	Female	2	Single	1	College/University or Above	4	Professional/White Collar Worker	2	PHP 100,000 or more	4	Rural	1	Region IV-A	No	2	2	1	2	4	2	5	2	1	1	1	1	3	2	1	1	Agree	3	2	3	2	3	4	2	2	1	3	2	4	4	2	4	2	2
25	1	Male	1	Single	1	College/University or Above	4	Student	4	PHP 20,000 to 100,000	3	Urban	2	NCR	Yes	1	2	1	1	5	3	4	2	1	1	3	2	3	2	1	4	Disagree	2	1	3	2	4	3	2	2	1	3	2	3	4	2	3	2	3
20	1	Female	2	Single	1	College/University or Above	4	Student	4	PHP 10,000 or less	1	Urban	2	NCR	No	2	2	1	2	3	1	4	2	1	1	2	1	4	2	4	2	Strongly Disagree	1	1	3	2	4	3	2	2	1	3	2	4	3	2	2	1	2
21	1	Male	1	Single	1	College/University or Above	4	Student	4	PHP 10,000 or less	1	Urban	2	NCR	No	2	2	1	2	3	1	4	2	2	1	2	1	4	2	4	3	Agree	3	2	4	2	4	4	2	4	2	4	2	4	4	2	4	2	2
19	1	Female	2	Single	1	College/University or Above	4	Student	4	PHP 10,000 or less	1	Urban	2	Region IV-A	No	2	2	2	2	4	2	4	2	3	2	4	2	4	2	1	3	Strongly Disagree	1	1	2	1	4	4	2	4	2	4	2	4	3	2	3	2	3
27	1	Female	2	Single	1	College/University or Above	4	Professional/White Collar Worker	2	PHP 20,000 to 100,000	3	Urban	2	NCR	No	2	2	1	1	3	1	4	2	2	1	2	1	3	2	4	2	Agree	3	2	3	2	4	3	2	2	1	4	2	4	3	2	3	2	3
21	1	Male	1	Single	1	College/University or Above	4	Student	4	PHP 10,000 or less	1	Urban	2	Region XII	No	2	2	2	2	5	3	4	2	2	1	2	1	3	2	1	3	Agree	3	2	4	2	4	4	2	4	2	4	2	4	3	2	3	2	4
23	1	Male	1	Single	1	College/University or Above	4	Student	4	PHP 20,000 to 100,000	3	Urban	2	NCR	No	2	2	2	2	2	1	5	2	1	1	3	2	4	2	1	3	Disagree	2	1	3	2	3	4	2	3	2	2	1	3	4	2	3	2	2
74	5	Female	2	Married	2	College/University or Above	4	Professional/White Collar Worker	2	PHP 100,000 or more	4	Urban	2	Region IV-A	No	2	2	2	2	3	1	3	1	2	1	2	1	2	1	1	1	Strongly Disagree	1	1	3	2	3	3	2	2	1	1	1	2	3	2	2	1	4
18	1	Female	2	Single	1	College/University or Above	4	Student	4	PHP 10,000 or less	1	Urban	2	NCR	No	2	2	1	2	4	2	2	1	3	2	3	2	3	2	1	2	Disagree	2	1	3	2	4	4	2	4	2	4	2	4	3	2	2	1	3
44	3	Female	2	Married	2	College/University or Above	4	Professional/White Collar Worker	2	PHP 20,000 to 100,000	3	Rural	1	Region III	No	2	2	1	1	4	2	3	1	2	1	2	1	2	1	1	3	Strongly Disagree	1	1	4	2	4	3	2	3	2	4	2	4	3	2	3	2	3
20	1	Male	1	Single	1	College/University or Above	4	Student	4	PHP 10,000 or less	1	Urban	2	NCR	Yes	1	2	1	2	4	2	3	1	2	1	2	1	2	1	1	3	Strongly Disagree	1	1	3	2	4	4	2	3	2	4	2	4	3	2	3	2	3
55	4	Female	2	Married	2	College/University or Above	4	Professional/White Collar Worker	2	PHP 20,000 to 100,000	3	Urban	2	Region IV-A	No	2	2	1	2	4	2	4	2	3	2	3	2	3	2	1	3	Disagree	2	1	4	2	4	4	2	4	2	4	2	4	4	2	4	2	3
71	5	Female	2	Married	2	College/University or Above	4	Professional/White Collar Worker	2	PHP 20,000 to 100,000	3	Urban	2	NCR	Yes	1	2	1	2	5	3	5	2	2	1	3	2	3	2	1	4	Strongly Disagree	1	1	3	2	3	4	2	4	2	4	2	3	3	2	3	2	3
54	4	Female	2	Married	2	College/University or Above	4	Professional/White Collar Worker	2	PHP 10,000 to 20,000	2	Rural	1	Region VII	No	2	2	1	1	4	2	5	2	2	1	3	2	3	2	4	2	Agree	3	2	3	2	3	4	2	3	2	3	2	3	3	2	3	2	3
20	1	Female	2	Single	1	College/University or Above	4	Student	4	PHP 10,000 or less	1	Rural	1	Region I	No	2	2	1	2	4	2	5	2	1	1	3	2	4	2	4	2	Agree	3	2	4	2	4	4	2	4	2	4	2	4	4	2	4	2	3
21	1	Male	1	Single	1	College/University or Above	4	Student	4	PHP 10,000 or less	1	Rural	1	Region VI	No	2	2	1	2	4	2	4	2	3	2	4	2	4	2	4	2	Agree	3	2	4	2	4	4	2	3	2	4	2	4	3	2	3	2	4
28	1	Female	2	Single	1	College/University or Above	4	Professional/White Collar Worker	2	PHP 10,000 to 20,000	2	Urban	2	Region VII	No	2	2	1	2	4	2	4	2	3	2	3	2	4	2	1	2	Strongly Agree	4	2	4	2	4	4	2	3	2	3	2	4	4	2	4	2	3
25	1	Female	2	Single	1	College/University or Above	4	Professional/White Collar Worker	2	PHP 10,000 to 20,000	2	Urban	2	Region VII	No	2	2	2	2	4	2	4	2	3	2	4	2	4	2	2	3	Agree	3	2	3	2	4	4	2	3	2	3	2	4	3	2	3	2	3
19	1	Female	2	Single	1	College/University or Above	4	Student	4	PHP 10,000 or less	1	Urban	2	Region IV-A	No	2	2	1	2	5	3	5	2	1	1	4	2	3	2	1	3	Agree	3	2	4	2	4	4	2	4	2	4	2	4	3	2	3	2	3
27	1	Female	2	Single	1	College/University or Above	4	Professional/White Collar Worker	2	PHP 10,000 to 20,000	2	Urban	2	Region VII	No	2	2	2	2	5	3	4	2	3	2	3	2	3	2	4	2	Agree	3	2	4	2	4	4	2	4	2	4	2	4	4	2	4	2	3
67	5	Female	2	Married	2	College/University or Above	4	Professional/White Collar Worker	2	PHP 100,000 or more	4	Urban	2	NCR	No	2	2	1	1	5	3	2	1	2	1	2	1	2	1	1	1	Disagree	2	1	3	2	3	3	2	3	2	3	2	3	2	1	2	1	3
58	4	Female	2	Single	1	College/University or Above	4	Professional/White Collar Worker	2	PHP 100,000 or more	4	Urban	2	NCR	Yes	1	2	1	1	3	1	5	2	2	1	2	1	3	2	4	1	Strongly Agree	4	2	4	2	4	4	2	4	2	4	2	4	3	2	4	2	3
59	4	Female	2	Married	2	College/University or Above	4	Professional/White Collar Worker	2	PHP 20,000 to 100,000	3	Urban	2	NCR	Yes	1	2	2	2	5	3	3	1	2	1	2	1	3	2	4	2	Disagree	2	1	4	2	4	4	2	2	1	4	2	4	2	1	2	1	4
43	3	Female	2	Married	2	College/University or Above	4	Professional/White Collar Worker	2	PHP 20,000 to 100,000	3	Urban	2	Region VII	No	2	2	2	2	5	3	4	2	1	1	3	2	3	2	4	1	Strongly Disagree	1	1	1	1	2	1	1	1	1	4	2	4	3	2	3	2	4
59	4	Female	2	Married	2	College/University or Above	4	Professional/White Collar Worker	2	PHP 20,000 to 100,000	3	Urban	2	NCR	No	2	2	1	2	4	2	3	1	2	1	2	1	3	2	4	3	Disagree	2	1	3	2	3	3	2	2	1	3	2	3	3	2	3	2	3
20	1	Female	2	Single	1	College/University or Above	4	Student	4	PHP 10,000 or less	1	Rural	1	Region II	No	2	2	1	2	4	2	5	2	1	1	3	2	3	2	1	3	Disagree	2	1	2	1	3	4	2	3	2	3	2	3	3	2	3	2	3
64	5	Male	1	Married	2	College/University or Above	4	Housewife/Retired/Unemployed/Other	5	PHP 10,000 to 20,000	2	Urban	2	NCR	No	2	2	1	1	4	2	5	2	2	1	2	1	3	2	4	1	Disagree	2	1	3	2	3	3	2	3	2	3	2	3	3	2	3	2	3
44	3	Female	2	Married	2	College/University or Above	4	Professional/White Collar Worker	2	PHP 100,000 or more	4	Urban	2	NCR	Yes	1	2	1	1	4	2	3	1	1	1	1	1	3	2	4	2	Disagree	2	1	3	2	3	4	2	3	2	4	2	4	3	2	3	2	3
20	1	Female	2	Single	1	College/University or Above	4	Student	4	PHP 10,000 or less	1	Urban	2	NCR	No	2	2	1	2	4	2	5	2	2	1	3	2	4	2	4	3	Disagree	2	1	4	2	4	3	2	3	2	4	2	4	4	2	4	2	3
46	3	Male	1	Single	1	College/University or Above	4	Professional/White Collar Worker	2	PHP 100,000 or more	4	Urban	2	NCR	No	2	2	1	2	4	2	4	2	2	1	3	2	3	2	4	1	Disagree	2	1	3	2	4	4	2	3	2	4	2	4	3	2	3	2	3
50	3	Female	2	Married	2	College/University or Above	4	Self-employed	3	PHP 100,000 or more	4	Urban	2	Region VI	No	2	2	1	2	4	2	4	2	3	2	3	2	3	2	1	2	Agree	3	2	3	2	3	4	2	3	2	3	2	3	3	2	3	2	4
53	4	Male	1	Married	2	College/University or Above	4	Self-employed	3	PHP 100,000 or more	4	Urban	2	NCR	Yes	1	2	1	2	5	3	4	2	1	1	2	1	3	2	4	3	Agree	3	2	3	2	3	3	2	3	2	3	2	3	3	2	3	2	3
68	5	Female	2	Married	2	College/University or Above	4	Housewife/Retired/Unemployed/Other	5	PHP 20,000 to 100,000	3	Urban	2	NCR	No	2	2	1	2	5	3	5	2	1	1	1	1	4	2	4	1	Strongly Disagree	1	1	3	2	3	3	2	2	1	3	2	3	3	2	3	2	3
29	1	Female	2	Married	2	College/University or Above	4	Professional/White Collar Worker	2	PHP 10,000 or less	1	Rural	1	Region VI	No	2	2	2	2	5	3	3	1	2	1	2	1	2	1	1	3	Disagree	2	1	3	2	3	4	2	3	2	4	2	4	3	2	3	2	3
26	1	Female	2	Single	1	College/University or Above	4	Professional/White Collar Worker	2	PHP 10,000 or less	1	Rural	1	Region VI	No	2	2	1	2	5	3	4	2	1	1	3	2	3	2	1	3	Agree	3	2	3	2	4	4	2	3	2	3	2	4	3	2	4	2	4
43	3	Female	2	Married	2	College/University or Above	4	Professional/White Collar Worker	2	PHP 20,000 to 100,000	3	Rural	1	CAR	No	2	2	1	2	4	2	3	1	2	1	2	1	3	2	1	1	Disagree	2	1	3	2	3	4	2	3	2	4	2	4	3	2	3	2	3
20	1	Male	1	Single	1	College/University or Above	4	Student	4	PHP 100,000 or more	4	Urban	2	NCR	No	2	2	1	2	4	2	3	1	1	1	1	1	3	2	4	3	Disagree	2	1	3	2	4	4	2	3	2	4	2	4	3	2	4	2	2
41	3	Female	2	Married	2	College/University or Above	4	Housewife/Retired/Unemployed/Other	5	PHP 20,000 to 100,000	3	Urban	2	NCR	No	2	2	1	2	5	3	1	1	1	1	2	1	2	1	4	1	Disagree	2	1	4	2	2	3	2	2	1	2	1	2	2	1	2	1	4
63	5	Female	2	Single	1	College/University or Above	4	Housewife/Retired/Unemployed/Other	5	PHP 10,000 or less	1	Urban	2	Region VI	No	2	2	1	1	4	2	3	1	2	1	2	1	2	1	1	3	Disagree	2	1	2	1	2	3	2	3	2	2	1	2	2	1	2	1	3
44	3	Female	2	Married	2	College/University or Above	4	Professional/White Collar Worker	2	PHP 20,000 to 100,000	3	Urban	2	NCR	Yes	1	2	1	2	4	2	3	1	1	1	1	1	3	2	1	3	Disagree	2	1	3	2	3	3	2	2	1	4	2	4	2	1	2	1	4
25	1	Female	2	Single	1	College/University or Above	4	Self-employed	3	PHP 10,000 or less	1	Urban	2	Region VI	No	2	2	2	2	3	1	3	1	2	1	2	1	2	1	1	1	Disagree	2	1	4	2	4	4	2	3	2	3	2	4	2	1	2	1	4
65	5	Female	2	Single	1	College/University or Above	4	Housewife/Retired/Unemployed/Other	5	PHP 20,000 to 100,000	3	Urban	2	Region XII	No	2	2	1	2	4	2	3	1	2	1	2	1	2	1	1	2	Disagree	2	1	3	2	3	4	2	3	2	4	2	3	2	1	2	1	4
20	1	Female	2	Single	1	College/University or Above	4	Student	4	PHP 20,000 to 100,000	3	Rural	1	Region IV-A	No	2	2	2	2	4	2	3	1	1	1	2	1	3	2	4	3	Disagree	2	1	3	2	3	3	2	3	2	3	2	3	2	1	2	1	4
46	3	Female	2	Married	2	College/University or Above	4	Housewife/Retired/Unemployed/Other	5	PHP 10,000 to 20,000	2	Urban	2	NCR	No	2	2	1	2	4	2	3	1	2	1	2	1	3	2	1	1	Disagree	2	1	2	1	2	4	2	2	1	3	2	3	3	2	2	1	3
21	1	Female	2	Single	1	College/University or Above	4	Professional/White Collar Worker	2	PHP 10,000 to 20,000	2	Urban	2	Region VII	No	2	2	1	2	5	3	3	1	2	1	2	1	2	1	1	3	Agree	3	2	4	2	4	4	2	2	1	3	2	4	3	2	2	1	3
74	5	Female	2	Married	2	College/University or Above	4	Housewife/Retired/Unemployed/Other	5	PHP 10,000 or less	1	Urban	2	NCR	No	2	2	1	1	5	3	2	1	1	1	2	1	2	1	4	1	Strongly Disagree	1	1	1	1	3	4	2	3	2	3	2	3	3	2	2	1	3
30	1	Female	2	Single	1	College/University or Above	4	Professional/White Collar Worker	2	PHP 20,000 to 100,000	3	Rural	1	Region VII	No	2	2	1	2	5	3	4	2	3	2	3	2	3	2	1	1	Strongly Disagree	1	1	1	1	1	4	2	3	2	4	2	4	4	2	2	1	4
21	1	Female	2	Single	1	College/University or Above	4	Student	4	PHP 100,000 or more	4	Urban	2	NCR	No	2	2	1	2	3	1	4	2	2	1	2	1	2	1	1	3	Disagree	2	1	4	2	4	4	2	3	2	3	2	4	3	2	2	1	4
19	1	Female	2	Single	1	College/University or Above	4	Student	4	PHP 10,000 or less	1	Urban	2	NCR	No	2	2	2	2	3	1	4	2	2	1	2	1	3	2	1	4	Disagree	2	1	3	2	3	4	2	4	2	4	2	4	3	2	2	1	4
19	1	Female	2	Single	1	College/University or Above	4	Student	4	PHP 10,000 or less	1	Urban	2	Region IV-A	No	2	2	1	2	4	2	3	1	1	1	1	1	3	2	1	3	Disagree	2	1	3	2	4	3	2	3	2	4	2	4	3	2	2	1	3
38	2	Female	2	Married	2	College/University or Above	4	Housewife/Retired/Unemployed/Other	5	PHP 10,000 or less	1	Rural	1	Region IV-A	No	2	2	1	2	3	1	2	1	2	1	2	1	2	1	1	3	Strongly Agree	4	2	3	2	3	4	2	3	2	4	2	4	3	2	2	1	4
30	1	Female	2	Single	1	College/University or Above	4	Professional/White Collar Worker	2	PHP 20,000 to 100,000	3	Urban	2	NCR	No	2	2	1	2	4	2	3	1	1	1	1	1	3	2	1	1	Disagree	2	1	2	1	3	3	2	2	1	3	2	3	2	1	3	2	4
62	5	Female	2	Single	1	College/University or Above	4	Professional/White Collar Worker	2	PHP 20,000 to 100,000	3	Urban	2	Region VII	No	2	2	1	2	5	3	2	1	2	1	2	1	2	1	1	1	Disagree	2	1	2	1	3	4	2	3	2	3	2	3	2	1	3	2	4
48	3	Female	2	Married	2	College/University or Above	4	Self-employed	3	PHP 100,000 or more	4	Urban	2	NCR	No	2	2	1	1	3	1	3	1	2	1	2	1	3	2	1	3	Disagree	2	1	3	2	3	4	2	3	2	4	2	4	2	1	3	2	4
71	5	Female	2	Married	2	College/University or Above	4	Housewife/Retired/Unemployed/Other	5	PHP 100,000 or more	4	Urban	2	NCR	No	2	2	1	2	4	2	3	1	3	2	2	1	3	2	1	3	Agree	3	2	3	2	4	4	2	3	2	4	2	3	2	1	3	2	4
40	2	Female	2	Married	2	College/University or Above	4	Housewife/Retired/Unemployed/Other	5	PHP 20,000 to 100,000	3	Rural	1	Region III	No	2	2	1	2	4	2	3	1	2	1	2	1	3	2	4	1	Disagree	2	1	1	1	1	1	1	2	1	1	1	1	3	2	3	2	4
19	1	Female	2	Single	1	College/University or Above	4	Student	4	PHP 10,000 or less	1	Urban	2	NCR	No	2	2	2	2	3	1	4	2	1	1	1	1	1	1	1	1	Strongly Disagree	1	1	1	1	1	4	2	4	2	2	1	3	3	2	3	2	4
75	5	Male	1	Married	2	College/University or Above	4	Self-employed	3	PHP 20,000 to 100,000	3	Urban	2	NCR	No	2	2	1	1	4	2	3	1	1	1	2	1	3	2	4	2	Strongly Disagree	1	1	2	1	3	3	2	3	2	2	1	2	3	2	3	2	4
44	3	Female	2	Married	2	College/University or Above	4	Professional/White Collar Worker	2	PHP 20,000 to 100,000	3	Urban	2	Region VIII	No	2	2	1	1	4	2	4	2	3	2	2	1	3	2	1	3	Disagree	2	1	3	2	3	2	1	2	1	3	2	3	3	2	3	2	3
21	1	Female	2	Single	1	College/University or Above	4	Student	4	PHP 20,000 to 100,000	3	Urban	2	Region IV-A	No	2	2	1	2	5	3	4	2	3	2	3	2	3	2	1	3	Strongly Disagree	1	1	2	1	3	4	2	1	1	3	2	3	4	2	3	2	3
19	1	Female	2	Single	1	College/University or Above	4	Student	4	PHP 10,000 or less	1	Urban	2	NCR	Yes	1	2	1	2	4	2	5	2	2	1	3	2	3	2	1	1	Strongly Disagree	1	1	3	2	3	3	2	2	1	4	2	3	3	2	3	2	4
35	2	Female	2	Married	2	College/University or Above	4	Professional/White Collar Worker	2	PHP 10,000 to 20,000	2	Urban	2	Region VI	No	2	2	1	2	4	2	4	2	2	1	3	2	3	2	4	2	Disagree	2	1	4	2	4	4	2	2	1	4	2	4	3	2	3	2	4
38	2	Female	2	Married	2	College/University or Above	4	Professional/White Collar Worker	2	PHP 20,000 to 100,000	3	Urban	2	NCR	No	2	2	2	2	4	2	3	1	2	1	3	2	4	2	4	1	Disagree	2	1	4	2	4	4	2	2	1	4	2	4	3	2	3	2	4
60	4	Female	2	Married	2	College/University or Above	4	Professional/White Collar Worker	2	PHP 20,000 to 100,000	3	Urban	2	Region IV-B	No	2	2	2	2	4	2	2	1	1	1	2	1	3	2	4	1	Disagree	2	1	3	2	3	3	2	2	1	3	2	3	3	2	3	2	4
42	3	Female	2	Married	2	College/University or Above	4	Housewife/Retired/Unemployed/Other	5	PHP 20,000 to 100,000	3	Urban	2	NCR	No	2	2	2	2	4	2	4	2	2	1	3	2	3	2	1	3	Disagree	2	1	3	2	3	3	2	2	1	3	2	3	3	2	3	2	3
47	3	Female	2	Married	2	College/University or Above	4	Professional/White Collar Worker	2	PHP 20,000 to 100,000	3	Urban	2	NCR	No	2	2	1	2	5	3	3	1	2	1	2	1	2	1	1	2	Disagree	2	1	4	2	4	4	2	2	1	4	2	4	3	2	3	2	4
59	4	Female	2	Single	1	College/University or Above	4	Professional/White Collar Worker	2	PHP 100,000 or more	4	Urban	2	Region VI	No	2	2	1	2	5	3	4	2	1	1	1	1	3	2	4	3	Disagree	2	1	4	2	4	4	2	2	1	4	2	4	3	2	3	2	4
62	5	Female	2	Married	2	College/University or Above	4	Professional/White Collar Worker	2	PHP 20,000 to 100,000	3	Urban	2	Region X	No	2	2	2	2	5	3	2	1	1	1	2	1	2	1	1	1	Disagree	2	1	4	2	4	4	2	2	1	4	2	4	3	2	3	2	4
21	1	Female	2	Single	1	College/University or Above	4	Student	4	PHP 10,000 or less	1	Rural	1	Region VI	No	2	2	2	2	4	2	4	2	3	2	3	2	3	2	1	3	Disagree	2	1	4	2	4	2	1	3	2	4	2	4	3	2	3	2	4
20	1	Female	2	Single	1	College/University or Above	4	Student	4	PHP 10,000 or less	1	Rural	1	Region I	No	2	2	1	2	4	2	5	2	1	1	3	2	3	2	4	3	Strongly Disagree	1	1	2	1	2	4	2	4	2	4	2	4	4	2	4	2	3
56	4	Female	2	Single	1	College/University or Above	4	Professional/White Collar Worker	2	PHP 20,000 to 100,000	3	Urban	2	NCR	No	2	2	1	2	5	3	4	2	2	1	2	1	4	2	4	2	Disagree	2	1	2	1	2	4	2	3	2	3	2	3	3	2	3	2	4
28	1	Male	1	Single	1	College/University or Above	4	Professional/White Collar Worker	2	PHP 20,000 to 100,000	3	Rural	1	CAR	No	2	2	2	2	5	3	2	1	2	1	2	1	2	1	1	3	Disagree	2	1	2	1	3	3	2	3	2	3	2	3	3	2	3	2	3
21	1	Female	2	Single	1	College/University or Above	4	Student	4	PHP 10,000 or less	1	Rural	1	Region III	No	2	2	2	1	3	1	4	2	1	1	2	1	3	2	1	3	Disagree	2	1	4	2	4	3	2	3	2	4	2	4	3	2	3	2	3
49	3	Female	2	Married	2	College/University or Above	4	Professional/White Collar Worker	2	PHP 20,000 to 100,000	3	Rural	1	Region IX	No	2	2	1	2	3	1	3	1	2	1	2	1	2	1	1	1	Disagree	2	1	4	2	4	4	2	4	2	4	2	4	3	2	3	2	4
21	1	Female	2	Single	1	College/University or Above	4	Student	4	PHP 10,000 or less	1	Urban	2	NCR	Yes	1	2	1	2	2	1	3	1	2	1	2	1	2	1	1	3	Disagree	2	1	4	2	4	4	2	4	2	4	2	4	3	2	3	2	4
20	1	Female	2	Single	1	College/University or Above	4	Student	4	PHP 10,000 or less	1	Urban	2	NCR	Yes	1	2	2	2	3	1	3	1	2	1	3	2	3	2	1	1	Disagree	2	1	3	2	3	3	2	3	2	3	2	3	3	2	3	2	4
20	1	Female	2	Single	1	College/University or Above	4	Student	4	PHP 10,000 or less	1	Urban	2	NCR	No	2	2	2	2	3	1	4	2	3	2	3	2	3	2	1	3	Disagree	2	1	3	2	3	4	2	3	2	3	2	4	3	2	3	2	3
20	1	Female	2	Single	1	College/University or Above	4	Student	4	PHP 10,000 or less	1	Urban	2	Region XI	No	2	2	1	2	4	2	3	1	2	1	2	1	3	2	1	2	Disagree	2	1	3	2	3	4	2	3	2	4	2	4	3	2	3	2	4
23	1	Female	2	Single	1	College/University or Above	4	Professional/White Collar Worker	2	PHP 10,000 to 20,000	2	Urban	2	Region VI	No	2	2	1	2	4	2	4	2	2	1	3	2	3	2	4	2	Disagree	2	1	3	2	4	3	2	3	2	3	2	4	3	2	3	2	3
49	3	Female	2	Married	2	College/University or Above	4	Professional/White Collar Worker	2	PHP 10,000 to 20,000	2	Urban	2	Region VI	No	2	2	1	2	4	2	4	2	2	1	3	2	3	2	1	4	Disagree	2	1	3	2	3	3	2	3	2	4	2	4	3	2	3	2	4
41	3	Male	1	Married	2	College/University or Above	4	Professional/White Collar Worker	2	PHP 20,000 to 100,000	3	Urban	2	NCR	No	2	2	1	2	4	2	2	1	2	1	2	1	2	1	1	1	Disagree	2	1	4	2	4	4	2	3	2	4	2	4	3	2	3	2	4
45	3	Female	2	Married	2	College/University or Above	4	Professional/White Collar Worker	2	PHP 20,000 to 100,000	3	Urban	2	NCR	No	2	2	1	2	4	2	3	1	2	1	3	2	3	2	4	1	Disagree	2	1	3	2	3	4	2	3	2	4	2	4	3	2	3	2	4
52	4	Female	2	Married	2	College/University or Above	4	Professional/White Collar Worker	2	PHP 20,000 to 100,000	3	Urban	2	NCR	No	2	2	1	2	4	2	4	2	3	2	1	1	4	2	4	1	Disagree	2	1	3	2	3	4	2	3	2	4	2	4	3	2	3	2	3
62	5	Male	1	Married	2	College/University or Above	4	Blue Collar Worker	1	PHP 100,000 or more	4	Urban	2	Region IV-A	Yes	1	2	1	2	4	2	4	2	2	1	2	1	3	2	1	4	Disagree	2	1	4	2	4	4	2	3	2	4	2	4	3	2	3	2	4
19	1	Female	2	Single	1	College/University or Above	4	Student	4	PHP 100,000 or more	4	Urban	2	Region III	No	2	2	1	2	4	2	5	2	2	1	3	2	3	2	1	3	Disagree	2	1	3	2	3	4	2	4	2	3	2	3	4	2	3	2	3
65	5	Male	1	Married	2	College/University or Above	4	Housewife/Retired/Unemployed/Other	5	PHP 100,000 or more	4	Urban	2	Region X	No	2	2	1	2	4	2	3	1	2	1	2	1	2	1	1	3	Disagree	2	1	4	2	4	4	2	3	2	4	2	4	3	2	3	2	3
20	1	Male	1	Single	1	College/University or Above	4	Student	4	PHP 10,000 or less	1	Rural	1	Region I	No	2	2	2	2	4	2	3	1	2	1	2	1	4	2	4	1	Disagree	2	1	4	2	4	3	2	3	2	3	2	4	4	2	4	2	3
20	1	Male	1	Single	1	College/University or Above	4	Student	4	PHP 10,000 or less	1	Urban	2	NCR	Yes	1	2	2	2	4	2	3	1	2	1	2	1	2	1	1	1	Disagree	2	1	3	2	4	4	2	4	2	4	2	4	3	2	3	2	4
23	1	Female	2	Single	1	College/University or Above	4	Professional/White Collar Worker	2	PHP 10,000 to 20,000	2	Urban	2	Region IV-A	No	2	2	2	2	4	2	5	2	1	1	3	2	3	2	4	3	Strongly Disagree	1	1	4	2	4	4	2	4	2	4	2	4	3	2	3	2	4
20	1	Male	1	Single	1	College/University or Above	4	Student	4	PHP 20,000 to 100,000	3	Urban	2	NCR	Yes	1	2	2	2	4	2	5	2	1	1	2	1	3	2	1	3	Disagree	2	1	3	2	4	3	2	3	2	4	2	4	3	2	3	2	3
21	1	Male	1	Single	1	College/University or Above	4	Student	4	PHP 10,000 or less	1	Rural	1	Region IV-A	No	2	2	2	1	5	3	4	2	1	1	3	2	3	2	1	4	Strongly Disagree	1	1	3	2	3	3	2	3	2	4	2	4	4	2	4	2	3
21	1	Female	2	Single	1	College/University or Above	4	Professional/White Collar Worker	2	PHP 10,000 or less	1	Rural	1	Region VI	No	2	2	1	2	5	3	4	2	3	2	3	2	3	2	1	2	Disagree	2	1	4	2	4	4	2	3	2	4	2	4	3	2	3	2	4
19	1	Female	2	Single	1	College/University or Above	4	Student	4	PHP 10,000 to 20,000	2	Urban	2	Region IV-A	No	2	2	1	2	5	3	3	1	2	1	2	1	2	1	1	1	Disagree	2	1	3	2	3	3	2	3	2	3	2	3	3	2	3	2	3
21	1	Female	2	Single	1	College/University or Above	4	Student	4	PHP 100,000 or more	4	Urban	2	NCR	No	2	2	1	2	5	3	3	1	2	1	2	1	3	2	4	3	Disagree	2	1	3	2	3	3	2	3	2	3	2	3	3	2	3	2	4
19	1	Female	2	Single	1	College/University or Above	4	Student	4	PHP 10,000 or less	1	Rural	1	Region IV-A	No	2	2	2	2	5	3	3	1	2	1	2	1	2	1	1	3	Strongly Disagree	1	1	3	2	4	4	2	3	2	4	2	4	3	2	3	2	4
43	3	Female	2	Married	2	College/University or Above	4	Professional/White Collar Worker	2	PHP 20,000 to 100,000	3	Urban	2	NCR	Yes	1	1	1	2	3	1	3	1	2	1	2	1	3	2	4	3	Strongly Agree	4	2	4	2	4	4	2	3	2	4	2	4	4	2	4	2	4
66	5	Female	2	Married	2	College/University or Above	4	Professional/White Collar Worker	2	PHP 100,000 or more	4	Urban	2	Region VI	No	2	2	1	1	4	2	5	2	2	1	2	1	3	2	1	4	Agree	3	2	4	2	4	4	2	4	2	4	2	4	4	2	4	2	3
58	4	Female	2	Married	2	College/University or Above	4	Professional/White Collar Worker	2	PHP 20,000 to 100,000	3	Urban	2	Region I	No	2	2	2	1	4	2	4	2	1	1	1	1	3	2	4	1	Agree	3	2	3	2	4	4	2	4	2	4	2	4	4	2	4	2	4
57	4	Female	2	Single	1	College/University or Above	4	Professional/White Collar Worker	2	PHP 100,000 or more	4	Rural	1	Region VI	No	2	2	1	2	4	2	4	2	1	1	1	1	4	2	4	2	Agree	3	2	4	2	4	4	2	4	2	4	2	4	4	2	4	2	3
24	1	Female	2	Single	1	College/University or Above	4	Professional/White Collar Worker	2	PHP 10,000 to 20,000	2	Urban	2	NCR	No	2	2	1	2	4	2	4	2	1	1	2	1	3	2	4	4	Agree	3	2	3	2	3	3	2	3	2	4	2	4	3	2	3	2	4
27	1	Male	1	Single	1	College/University or Above	4	Professional/White Collar Worker	2	PHP 10,000 to 20,000	2	Urban	2	Region VII	No	2	2	1	2	4	2	4	2	3	2	3	2	3	2	1	4	Agree	3	2	3	2	3	3	2	3	2	3	2	4	3	2	3	2	4
32	2	Male	1	Single	1	College/University or Above	4	Professional/White Collar Worker	2	PHP 20,000 to 100,000	3	Urban	2	Region VII	No	2	2	1	2	4	2	5	2	2	1	2	1	3	2	4	2	Agree	3	2	4	2	4	4	2	3	2	4	2	4	4	2	4	2	3
37	2	Male	1	Married	2	College/University or Above	4	Professional/White Collar Worker	2	PHP 20,000 to 100,000	3	Urban	2	Region X	No	2	2	1	2	4	2	5	2	2	1	1	1	3	2	4	3	Agree	3	2	3	2	3	4	2	3	2	3	2	4	3	2	3	2	3
22	1	Male	1	Single	1	College/University or Above	4	Student	4	PHP 10,000 or less	1	Rural	1	Region V	No	2	2	2	2	4	2	3	1	2	1	2	1	3	2	4	3	Agree	3	2	4	2	4	4	2	4	2	4	2	4	4	2	4	2	3
32	2	Female	2	Single	1	College/University or Above	4	Professional/White Collar Worker	2	PHP 20,000 to 100,000	3	Urban	2	NCR	Yes	1	2	1	2	5	3	4	2	2	1	3	2	3	2	4	3	Agree	3	2	4	2	3	4	2	3	2	4	2	4	3	2	3	2	4
20	1	Female	2	Single	1	College/University or Above	4	Student	4	PHP 10,000 or less	1	Urban	2	Region X	No	2	2	2	2	5	3	5	2	3	2	3	2	3	2	1	1	Strongly Agree	4	2	4	2	4	4	2	3	2	4	2	4	3	2	3	2	3
34	2	Male	1	Single	1	College/University or Above	4	Professional/White Collar Worker	2	PHP 20,000 to 100,000	3	Urban	2	NCR	No	2	2	1	1	4	2	5	2	2	1	2	1	3	2	4	4	Agree	3	2	3	2	4	3	2	3	2	3	2	4	3	2	3	2	3
63	5	Male	1	Married	2	College/University or Above	4	Professional/White Collar Worker	2	PHP 20,000 to 100,000	3	Urban	2	NCR	Yes	1	2	1	2	5	3	5	2	2	1	2	1	4	2	4	1	Disagree	2	1	2	1	2	3	2	2	1	3	2	3	3	2	3	2	2
20	1	Male	1	Single	1	College/University or Above	4	Student	4	PHP 10,000 or less	1	Urban	2	NCR	No	2	2	2	2	4	2	5	2	1	1	1	1	4	2	4	3	Disagree	2	1	4	2	4	4	2	3	2	4	2	4	4	2	4	2	2
76	5	Female	2	Married	2	College/University or Above	4	Housewife/Retired/Unemployed/Other	5	PHP 20,000 to 100,000	3	Urban	2	NCR	No	2	2	1	2	4	2	5	2	2	1	2	1	3	2	4	1	Disagree	2	1	2	1	2	4	2	3	2	4	2	2	3	2	3	2	3
21	1	Female	2	Single	1	College/University or Above	4	Student	4	PHP 10,000 or less	1	Urban	2	NCR	Yes	1	2	1	2	4	2	5	2	2	1	2	1	3	2	4	1	Agree	3	2	3	2	4	4	2	3	2	3	2	4	4	2	4	2	2
20	1	Male	1	Single	1	College/University or Above	4	Student	4	PHP 10,000 or less	1	Urban	2	NCR	No	2	2	2	2	4	2	4	2	3	2	2	1	4	2	4	4	Strongly Disagree	1	1	3	2	3	2	1	1	1	2	1	3	4	2	3	2	3
62	5	Female	2	Married	2	College/University or Above	4	Housewife/Retired/Unemployed/Other	5	PHP 10,000 to 20,000	2	Urban	2	Region III	No	2	2	1	1	5	3	4	2	2	1	3	2	4	2	4	1	Disagree	2	1	3	2	3	4	2	3	2	3	2	3	3	2	3	2	3
35	2	Male	1	Married	2	College/University or Above	4	Professional/White Collar Worker	2	PHP 100,000 or more	4	Urban	2	NCR	Yes	1	2	1	2	5	3	4	2	1	1	3	2	3	2	1	3	Disagree	2	1	3	2	3	3	2	3	2	3	2	3	3	2	3	2	3
37	2	Female	2	Single	1	College/University or Above	4	Professional/White Collar Worker	2	PHP 20,000 to 100,000	3	Urban	2	NCR	No	2	2	1	1	5	3	5	2	3	2	2	1	4	2	4	1	Disagree	2	1	3	2	4	4	2	2	1	2	1	4	4	2	4	2	2
20	1	Male	1	Single	1	College/University or Above	4	Student	4	PHP 10,000 or less	1	Urban	2	NCR	No	2	2	1	2	5	3	5	2	1	1	2	1	3	2	4	4	Disagree	2	1	3	2	4	4	2	3	2	4	2	4	4	2	4	2	2
28	1	Male	1	Single	1	College/University or Above	4	Housewife/Retired/Unemployed/Other	5	PHP 10,000 or less	1	Urban	2	Region III	No	2	2	1	2	5	3	5	2	3	2	2	1	3	2	4	5	Agree	3	2	4	2	3	3	2	2	1	3	2	4	2	1	3	2	3
63	5	Female	2	Married	2	College/University or Above	4	Housewife/Retired/Unemployed/Other	5	PHP 20,000 to 100,000	3	Urban	2	NCR	No	2	2	1	1	5	3	5	2	2	1	2	1	3	2	4	2	Disagree	2	1	3	2	3	4	2	2	1	4	2	3	3	2	3	2	3
35	2	Male	1	Single	1	College/University or Above	4	Student	4	PHP 20,000 to 100,000	3	Urban	2	NCR	Yes	1	2	2	2	4	2	5	2	1	1	2	1	4	2	4	1	Strongly Agree	4	2	3	2	3	3	2	2	1	3	2	3	4	2	4	2	3
28	1	Male	1	Single	1	College/University or Above	4	Professional/White Collar Worker	2	PHP 20,000 to 100,000	3	Urban	2	Region X	No	2	2	1	2	5	3	5	2	3	2	3	2	3	2	1	1	Agree	3	2	3	2	4	4	2	2	1	3	2	4	3	2	3	2	3
55	4	Male	1	Married	2	College/University or Above	4	Professional/White Collar Worker	2	PHP 20,000 to 100,000	3	Urban	2	Region XI	No	2	2	1	1	4	2	5	2	2	1	2	1	3	2	4	1	Disagree	2	1	3	2	3	4	2	3	2	3	2	4	4	2	3	2	3
25	1	Female	2	Married	2	College/University or Above	4	Professional/White Collar Worker	2	PHP 20,000 to 100,000	3	Urban	2	Region VI	No	2	2	2	2	4	2	5	2	2	1	3	2	3	2	1	4	Disagree	2	1	3	2	3	3	2	3	2	3	2	3	3	2	3	2	3
25	1	Female	2	Single	1	College/University or Above	4	Professional/White Collar Worker	2	PHP 20,000 to 100,000	3	Urban	2	NCR	Yes	1	2	1	2	4	2	5	2	3	2	3	2	4	2	4	3	Disagree	2	1	4	2	4	4	2	2	1	4	2	4	3	2	4	2	2
26	1	Male	1	Single	1	College/University or Above	4	Professional/White Collar Worker	2	PHP 10,000 to 20,000	2	Urban	2	NCR	Yes	1	2	1	2	4	2	5	2	2	1	2	1	4	2	4	3	Disagree	2	1	3	2	3	4	2	3	2	4	2	4	4	2	4	2	3
23	1	Female	2	Single	1	College/University or Above	4	Professional/White Collar Worker	2	PHP 10,000 to 20,000	2	Rural	1	Region VIII	No	2	2	1	2	5	3	5	2	2	1	3	2	3	2	1	2	Strongly Disagree	1	1	2	1	3	2	1	2	1	3	2	4	4	2	4	2	2
23	1	Male	1	Single	1	College/University or Above	4	Professional/White Collar Worker	2	PHP 10,000 or less	1	Urban	2	Region VI	No	2	2	2	2	5	3	5	2	1	1	1	1	4	2	4	5	Strongly Disagree	1	1	1	1	2	3	2	2	1	1	1	2	4	2	4	2	3
22	1	Male	1	Single	1	College/University or Above	4	Housewife/Retired/Unemployed/Other	5	PHP 10,000 or less	1	Urban	2	CAR	No	2	2	1	2	3	1	5	2	3	2	3	2	3	2	1	4	Strongly Agree	4	2	1	1	4	4	2	3	2	2	1	4	4	2	3	2	3
28	1	Male	1	Single	1	College/University or Above	4	Professional/White Collar Worker	2	PHP 20,000 to 100,000	3	Urban	2	Region X	No	2	2	1	2	3	1	4	2	2	1	2	1	4	2	4	5	Disagree	2	1	3	2	4	4	2	2	1	3	2	4	4	2	4	2	3
55	4	Female	2	Married	2	College/University or Above	4	Self-employed	3	PHP 10,000 to 20,000	2	Urban	2	NCR	Yes	1	2	1	1	3	1	4	2	3	2	3	2	4	2	4	4	Disagree	2	1	3	2	2	3	2	3	2	4	2	2	3	2	3	2	3
20	1	Female	2	Single	1	College/University or Above	4	Student	4	PHP 10,000 or less	1	Rural	1	Region IV-A	No	2	2	2	2	3	1	4	2	1	1	3	2	3	2	3	2	Strongly Disagree	1	1	4	2	3	4	2	3	2	3	2	2	3	2	3	2	3
20	1	Male	1	Single	1	College/University or Above	4	Student	4	PHP 10,000 or less	1	Urban	2	NCR	Yes	1	2	1	2	4	2	4	2	3	2	3	2	3	2	1	4	Disagree	2	1	4	2	4	4	2	3	2	3	2	3	3	2	3	2	3
52	4	Female	2	Married	2	College/University or Above	4	Self-employed	3	PHP 20,000 to 100,000	3	Urban	2	NCR	No	2	2	1	2	4	2	5	2	2	1	3	2	3	2	4	1	Strongly Disagree	1	1	4	2	4	4	2	4	2	4	2	4	3	2	3	2	3
18	1	Female	2	Single	1	College/University or Above	4	Student	4	PHP 10,000 or less	1	Urban	2	NCR	No	2	2	2	2	4	2	4	2	3	2	3	2	3	2	1	3	Disagree	2	1	3	2	3	4	2	3	2	4	2	4	4	2	4	2	4
21	1	Female	2	Single	1	College/University or Above	4	Student	4	PHP 10,000 or less	1	Urban	2	Region I	No	2	2	2	2	4	2	5	2	1	1	2	1	4	2	4	3	Disagree	2	1	4	2	4	4	2	4	2	4	2	4	3	2	3	2	3
27	1	Female	2	Single	1	College/University or Above	4	Professional/White Collar Worker	2	PHP 10,000 to 20,000	2	Urban	2	NCR	No	2	2	1	2	4	2	4	2	2	1	3	2	4	2	1	3	Agree	3	2	3	2	3	4	2	3	2	3	2	4	3	2	3	2	3
18	1	Female	2	Single	1	College/University or Above	4	Student	4	PHP 10,000 or less	1	Urban	2	NCR	No	2	2	1	1	3	1	5	2	3	2	3	2	3	2	1	4	Agree	3	2	3	2	3	4	2	3	2	4	2	3	3	2	3	2	3
69	5	Male	1	Married	2	College/University or Above	4	Professional/White Collar Worker	2	PHP 20,000 to 100,000	3	Urban	2	Region VII	No	2	2	2	2	4	2	5	2	2	1	2	1	3	2	4	2	Agree	3	2	3	2	4	4	2	3	2	3	2	3	3	2	3	2	3
37	2	Male	1	Single	1	College/University or Above	4	Professional/White Collar Worker	2	PHP 10,000 to 20,000	2	Urban	2	Region VII	No	2	2	1	2	4	2	4	2	2	1	2	1	4	2	4	3	Strongly Disagree	1	1	3	2	3	3	2	3	2	3	2	3	3	2	3	2	4
39	2	Female	2	Single	1	College/University or Above	4	Professional/White Collar Worker	2	PHP 10,000 or less	1	Rural	1	Region VI	No	2	2	2	2	4	2	5	2	3	2	3	2	3	2	1	1	Strongly Disagree	1	1	3	2	2	4	2	4	2	3	2	3	4	2	4	2	4
41	3	Male	1	Married	2	College/University or Above	4	Professional/White Collar Worker	2	PHP 100,000 or more	4	Urban	2	Region VI	No	2	2	2	2	4	2	4	2	2	1	3	2	4	2	4	2	Agree	3	2	3	2	3	3	2	3	2	3	2	3	3	2	3	2	3
22	1	Male	1	Single	1	College/University or Above	4	Student	4	PHP 10,000 to 20,000	2	Urban	2	Region III	No	2	2	1	2	5	3	3	1	1	1	1	1	3	2	4	4	Disagree	2	1	3	2	4	3	2	3	2	3	2	4	4	2	4	2	3
45	3	Male	1	Single	1	College/University or Above	4	Professional/White Collar Worker	2	PHP 10,000 to 20,000	2	Rural	1	Region VI	No	2	2	1	2	5	3	4	2	2	1	2	1	3	2	1	2	Agree	3	2	3	2	3	4	2	3	2	3	2	3	2	1	3	2	3
49	3	Female	2	Single	1	College/University or Above	4	Professional/White Collar Worker	2	PHP 20,000 to 100,000	3	Urban	2	NCR	No	2	2	1	2	5	3	5	2	1	1	1	1	4	2	4	1	Agree	3	2	3	2	4	4	2	2	1	3	2	3	4	2	4	2	2
53	4	Male	1	Single	1	College/University or Above	4	Professional/White Collar Worker	2	PHP 20,000 to 100,000	3	Rural	1	Region IV-A	No	2	2	1	2	5	3	5	2	1	1	1	1	4	2	4	2	Strongly Disagree	1	1	4	2	4	4	2	2	1	4	2	4	4	2	4	2	3
23	1	Male	1	Single	1	College/University or Above	4	Student	4	PHP 10,000 or less	1	Rural	1	Region IX	No	2	2	1	2	5	3	5	2	1	1	2	1	4	2	1	5	Strongly Disagree	1	1	3	2	4	4	2	4	2	3	2	4	4	2	4	2	3
67	5	Male	1	Married	2	College/University or Above	4	Professional/White Collar Worker	2	PHP 20,000 to 100,000	3	Urban	2	NCR	No	2	2	1	2	4	2	4	2	2	1	2	1	3	2	4	5	Agree	3	2	4	2	4	4	2	3	2	3	2	4	4	2	4	2	3
20	1	Female	2	Single	1	College/University or Above	4	Student	4	PHP 10,000 to 20,000	2	Rural	1	Region III	No	2	2	1	2	3	1	5	2	1	1	1	1	4	2	4	3	Disagree	2	1	3	2	3	3	2	3	2	4	2	4	4	2	4	2	2
19	1	Male	1	Single	1	College/University or Above	4	Student	4	PHP 20,000 to 100,000	3	Urban	2	Region II	No	2	2	2	2	4	2	5	2	3	2	3	2	3	2	1	3	Disagree	2	1	3	2	4	3	2	3	2	3	2	4	3	2	2	1	3
20	1	Female	2	Single	1	College/University or Above	4	Student	4	PHP 10,000 or less	1	Urban	2	Region IV-A	No	2	2	1	2	3	1	5	2	1	1	1	1	4	2	4	4	Agree	3	2	3	2	4	2	1	3	2	2	1	4	3	2	3	2	3
19	1	Female	2	Single	1	College/University or Above	4	Student	4	PHP 10,000 or less	1	Urban	2	NCR	No	2	2	1	2	4	2	5	2	3	2	3	2	3	2	1	3	Disagree	2	1	3	2	4	2	1	2	1	3	2	4	3	2	3	2	4
19	1	Female	2	Single	1	College/University or Above	4	Student	4	PHP 10,000 or less	1	Urban	2	NCR	No	2	2	1	2	5	3	4	2	1	1	1	1	3	2	4	2	Strongly Disagree	1	1	1	1	2	4	2	4	2	4	2	4	3	2	3	2	3
45	3	Female	2	Single	1	College/University or Above	4	Housewife/Retired/Unemployed/Other	5	PHP 10,000 or less	1	Urban	2	Region X	No	2	2	1	1	2	1	1	1	1	1	2	1	3	2	4	3	Disagree	2	1	3	2	2	4	2	4	2	4	2	4	4	2	4	2	4
19	1	Female	2	Single	1	College/University or Above	4	Student	4	PHP 20,000 to 100,000	3	Rural	1	Region III	No	2	2	1	2	5	3	3	1	2	1	3	2	3	2	1	2	Strongly Disagree	1	1	3	2	3	3	2	3	2	3	2	4	3	2	3	2	3
45	3	Male	1	Married	2	College/University or Above	4	Housewife/Retired/Unemployed/Other	5	PHP 10,000 or less	1	Urban	2	NCR	Yes	1	2	1	2	3	1	4	2	2	1	2	1	3	2	4	3	Agree	3	2	4	2	4	4	2	3	2	3	2	4	3	2	3	2	3
22	1	Female	2	Single	1	College/University or Above	4	Professional/White Collar Worker	2	PHP 20,000 to 100,000	3	Urban	2	NCR	No	2	2	1	2	4	2	5	2	1	1	3	2	3	2	1	4	Strongly Agree	4	2	4	2	4	3	2	4	2	4	2	4	4	2	4	2	3
23	1	Female	2	Single	1	College/University or Above	4	Student	4	PHP 10,000 or less	1	Urban	2	NCR	Yes	1	2	2	2	4	2	4	2	1	1	1	1	3	2	1	3	Agree	3	2	3	2	4	4	2	3	2	4	2	4	3	2	3	2	4
30	1	Male	1	Single	1	College/University or Above	4	Housewife/Retired/Unemployed/Other	5	PHP 10,000 or less	1	Urban	2	NCR	No	2	2	1	2	4	2	4	2	2	1	2	1	4	2	4	2	Agree	3	2	3	2	4	3	2	3	2	3	2	4	3	2	3	2	3
58	4	Female	2	Married	2	College/University or Above	4	Housewife/Retired/Unemployed/Other	5	PHP 100,000 or more	4	Urban	2	NCR	Yes	1	2	1	1	4	2	4	2	3	2	2	1	3	2	2	1	Disagree	2	1	4	2	4	4	2	4	2	4	2	4	4	2	4	2	4
76	5	Female	2	Married	2	College/University or Above	4	Professional/White Collar Worker	2	PHP 100,000 or more	4	Urban	2	NCR	Yes	1	2	1	2	5	3	3	1	2	1	2	1	2	1	1	2	Disagree	2	1	2	1	3	3	2	3	2	2	1	3	2	1	2	1	4
73	5	Male	1	Married	2	College/University or Above	4	Housewife/Retired/Unemployed/Other	5	PHP 10,000 to 20,000	2	Urban	2	Region IV-A	No	2	2	2	1	4	2	5	2	3	2	3	2	3	2	1	4	Disagree	2	1	3	2	3	3	2	3	2	3	2	3	3	2	3	2	3
22	1	Male	1	Single	1	College/University or Above	4	Student	4	PHP 10,000 to 20,000	2	Urban	2	NCR	No	2	2	1	2	4	2	5	2	2	1	2	1	4	2	1	3	Agree	3	2	3	2	4	4	2	2	1	3	2	4	3	2	4	2	3
21	1	Male	1	Single	1	College/University or Above	4	Student	4	PHP 10,000 or less	1	Urban	2	Region III	No	2	2	1	2	3	1	5	2	2	1	2	1	3	2	1	2	Disagree	2	1	2	1	3	4	2	3	2	2	1	4	4	2	3	2	3
50	3	Male	1	Married	2	College/University or Above	4	Professional/White Collar Worker	2	PHP 20,000 to 100,000	3	Urban	2	Region VI	No	2	2	1	1	4	2	5	2	1	1	1	1	4	2	4	1	Agree	3	2	3	2	4	3	2	3	2	3	2	3	3	2	3	2	3
20	1	Female	2	Single	1	College/University or Above	4	Student	4	PHP 10,000 or less	1	Urban	2	Region I	No	2	2	2	2	5	3	3	1	1	1	3	2	3	2	3	3	Strongly Disagree	1	1	3	2	3	3	2	2	1	2	1	3	2	1	2	1	2
21	1	Female	2	Single	1	College/University or Above	4	Student	4	PHP 10,000 or less	1	Urban	2	Region IV-A	No	2	2	1	2	3	1	5	2	1	1	1	1	4	2	1	3	Agree	3	2	4	2	4	4	2	3	2	4	2	4	3	2	3	2	2
67	5	Female	2	Single	1	College/University or Above	4	Housewife/Retired/Unemployed/Other	5	PHP 100,000 or more	4	Rural	1	Region VI	No	2	2	1	2	4	2	2	1	1	1	2	1	4	2	4	1	Disagree	2	1	2	1	3	3	2	2	1	3	2	3	2	1	2	1	4
23	1	Female	2	Single	1	College/University or Above	4	Professional/White Collar Worker	2	PHP 10,000 to 20,000	2	Rural	1	Region VI	No	2	2	1	2	4	2	2	1	1	1	2	1	2	1	1	3	Disagree	2	1	4	2	4	3	2	2	1	3	2	4	2	1	2	1	4
66	5	Female	2	Married	2	College/University or Above	4	Self-employed	3	PHP 20,000 to 100,000	3	Urban	2	NCR	No	2	2	1	2	4	2	3	1	1	1	1	1	2	1	1	1	Strongly Disagree	1	1	3	2	3	3	2	2	1	3	2	3	2	1	2	1	3
60	4	Male	1	Married	2	College/University or Above	4	Professional/White Collar Worker	2	PHP 20,000 to 100,000	3	Urban	2	NCR	No	2	2	1	1	3	1	2	1	2	1	3	2	3	2	1	3	Disagree	2	1	2	1	2	3	2	3	2	3	2	3	2	1	2	1	3
39	2	Male	1	Single	1	College/University or Above	4	Professional/White Collar Worker	2	PHP 10,000 to 20,000	2	Rural	1	Region II	No	2	2	2	2	5	3	3	1	2	1	2	1	2	1	1	3	Strongly Disagree	1	1	2	1	2	4	2	3	2	3	2	3	2	1	2	1	4
21	1	Female	2	Single	1	College/University or Above	4	Student	4	PHP 10,000 or less	1	Urban	2	NCR	Yes	1	2	1	2	4	2	1	1	1	1	1	1	1	1	1	1	Strongly Disagree	1	1	3	2	4	4	2	4	2	3	2	4	2	1	2	1	4
22	1	Female	2	Single	1	College/University or Above	4	Professional/White Collar Worker	2	PHP 10,000 or less	1	Urban	2	Region VI	No	2	2	2	2	4	2	3	1	1	1	3	2	3	2	1	3	Strongly Disagree	1	1	3	2	4	4	2	4	2	4	2	4	2	1	2	1	4
37	2	Female	2	Married	2	College/University or Above	4	Professional/White Collar Worker	2	PHP 10,000 to 20,000	2	Urban	2	Region X	No	2	1	1	2	5	3	1	1	1	1	3	2	4	2	4	2	Strongly Disagree	1	1	4	2	4	4	2	3	2	4	2	4	2	1	2	1	4
59	4	Female	2	Married	2	College/University or Above	4	Professional/White Collar Worker	2	PHP 20,000 to 100,000	3	Urban	2	Region IV-A	No	2	2	1	2	5	3	1	1	1	1	1	1	1	1	1	1	Disagree	2	1	4	2	4	4	2	4	2	4	2	4	2	1	2	1	4
52	4	Male	1	Single	1	College/University or Above	4	Professional/White Collar Worker	2	PHP 100,000 or more	4	Urban	2	Region VII	No	2	2	1	2	5	3	1	1	1	1	1	1	2	1	1	1	Strongly Disagree	1	1	3	2	4	4	2	3	2	4	2	4	2	1	2	1	4
39	2	Female	2	Single	1	College/University or Above	4	Professional/White Collar Worker	2	PHP 20,000 to 100,000	3	Urban	2	NCR	Yes	1	2	1	2	4	2	2	1	2	1	2	1	3	2	1	1	Agree	3	2	3	2	4	3	2	3	2	3	2	4	2	1	2	1	4
60	4	Female	2	Married	2	College/University or Above	4	Professional/White Collar Worker	2	PHP 20,000 to 100,000	3	Urban	2	Region IV-A	No	2	2	1	2	5	3	3	1	1	1	1	1	2	1	1	1	Agree	3	2	3	2	3	3	2	3	2	4	2	4	2	1	2	1	4
20	1	Female	2	Single	1	College/University or Above	4	Student	4	PHP 10,000 or less	1	Urban	2	NCR	Yes	1	2	1	2	4	2	4	2	1	1	3	2	3	2	1	4	Strongly Agree	4	2	4	2	4	4	2	4	2	4	2	4	3	2	2	1	3
35	2	Male	1	Married	2	College/University or Above	4	Self-employed	3	PHP 20,000 to 100,000	3	Urban	2	NCR	No	2	2	1	2	5	3	5	2	1	1	1	1	3	2	1	1	Strongly Agree	4	2	4	2	4	4	2	4	2	4	2	4	2	1	3	2	3
44	3	Male	1	Married	2	College/University or Above	4	Blue Collar Worker	1	PHP 20,000 to 100,000	3	Rural	1	Region III	No	2	2	1	2	5	3	5	2	2	1	3	2	3	2	1	3	Disagree	2	1	3	2	3	3	2	2	1	2	1	2	3	2	3	2	3
60	4	Male	1	Married	2	College/University or Above	4	Professional/White Collar Worker	2	PHP 100,000 or more	4	Urban	2	NCR	Yes	1	2	1	2	4	2	3	1	2	1	2	1	3	2	4	3	Agree	3	2	3	2	3	3	2	2	1	2	1	3	3	2	3	2	4
49	3	Male	1	Married	2	College/University or Above	4	Professional/White Collar Worker	2	PHP 20,000 to 100,000	3	Urban	2	Region IV-A	No	2	2	1	2	3	1	3	1	1	1	2	1	3	2	1	2	Agree	3	2	2	1	2	4	2	2	1	3	2	3	3	2	3	2	3
20	1	Female	2	Single	1	College/University or Above	4	Student	4	PHP 10,000 or less	1	Rural	1	Region IV-B	No	2	2	1	2	4	2	4	2	1	1	2	1	3	2	4	2	Disagree	2	1	3	2	3	3	2	2	1	3	2	3	3	2	3	2	4
29	1	Female	2	Single	1	College/University or Above	4	Professional/White Collar Worker	2	PHP 10,000 to 20,000	2	Rural	1	Region III	No	2	2	1	2	4	2	5	2	3	2	3	2	4	2	1	1	Disagree	2	1	4	2	4	4	2	2	1	4	2	4	4	2	4	2	4
60	4	Female	2	Married	2	College/University or Above	4	Professional/White Collar Worker	2	PHP 10,000 to 20,000	2	Rural	1	NCR	No	2	2	1	2	4	2	4	2	3	2	3	2	4	2	4	3	Disagree	2	1	3	2	4	3	2	2	1	4	2	4	3	2	3	2	3
22	1	Male	1	Single	1	College/University or Above	4	Professional/White Collar Worker	2	PHP 10,000 to 20,000	2	Rural	1	Region III	No	2	2	1	2	5	3	4	2	2	1	3	2	3	2	1	1	Strongly Disagree	1	1	4	2	4	4	2	2	1	4	2	4	4	2	4	2	3
21	1	Female	2	Single	1	College/University or Above	4	Student	4	PHP 20,000 to 100,000	3	Urban	2	NCR	No	2	2	2	2	3	1	5	2	2	1	2	1	3	2	1	3	Agree	3	2	3	2	3	3	2	2	1	3	2	3	3	2	3	2	3
21	1	Female	2	Single	1	College/University or Above	4	Professional/White Collar Worker	2	PHP 10,000 or less	1	Rural	1	Region III	No	2	2	2	2	4	2	3	1	1	1	2	1	3	2	1	1	Strongly Disagree	1	1	2	1	2	4	2	3	2	3	2	3	3	2	3	2	4
18	1	Male	1	Single	1	College/University or Above	4	Student	4	PHP 10,000 or less	1	Urban	2	NCR	Yes	1	2	2	2	4	2	4	2	2	1	2	1	3	2	1	2	Disagree	2	1	2	1	2	3	2	3	2	3	2	3	3	2	3	2	4
19	1	Male	1	Single	1	College/University or Above	4	Student	4	PHP 10,000 or less	1	Urban	2	NCR	No	2	2	2	2	5	3	2	1	2	1	2	1	2	1	4	2	Strongly Disagree	1	1	2	1	1	4	2	3	2	3	2	1	3	2	3	2	4
23	1	Female	2	Single	1	College/University or Above	4	Professional/White Collar Worker	2	PHP 20,000 to 100,000	3	Urban	2	NCR	No	2	2	2	2	5	3	4	2	1	1	2	1	2	1	1	2	Strongly Disagree	1	1	1	1	3	4	2	4	2	4	2	4	4	2	4	2	4
75	5	Male	1	Married	2	College/University or Above	4	Self-employed	3	PHP 20,000 to 100,000	3	Rural	1	Region IV-B	No	2	2	1	1	3	1	4	2	3	2	2	1	3	2	4	1	Disagree	2	1	3	2	3	3	2	3	2	4	2	3	4	2	4	2	4
18	1	Female	2	Single	1	College/University or Above	4	Student	4	PHP 10,000 or less	1	Urban	2	NCR	No	2	2	1	2	2	1	4	2	1	1	2	1	3	2	1	1	Disagree	2	1	3	2	4	4	2	4	2	4	2	4	3	2	3	2	4
19	1	Female	2	Single	1	College/University or Above	4	Student	4	PHP 10,000 or less	1	Urban	2	NCR	No	2	2	1	2	3	1	2	1	1	1	1	1	3	2	4	3	Disagree	2	1	4	2	4	4	2	4	2	4	2	4	3	2	3	2	4
54	4	Female	2	Married	2	College/University or Above	4	Housewife/Retired/Unemployed/Other	5	PHP 10,000 or less	1	Urban	2	NCR	No	2	2	2	1	4	2	5	2	1	1	2	1	3	2	4	4	Disagree	2	1	3	2	3	3	2	4	2	4	2	4	3	2	3	2	3
73	5	Male	1	Married	2	College/University or Above	4	Self-employed	3	PHP 20,000 to 100,000	3	Urban	2	Region I	Yes	1	2	2	1	4	2	4	2	2	1	2	1	3	2	4	3	Disagree	2	1	3	2	3	3	2	3	2	3	2	3	3	2	3	2	3
55	4	Female	2	Married	2	College/University or Above	4	Professional/White Collar Worker	2	PHP 100,000 or more	4	Rural	1	Region IV-A	No	2	2	1	2	4	2	5	2	2	1	3	2	3	2	1	2	Disagree	2	1	4	2	4	4	2	3	2	4	2	4	4	2	4	2	3
39	2	Male	1	Married	2	College/University or Above	4	Blue Collar Worker	1	PHP 10,000 to 20,000	2	Urban	2	Region III	No	2	2	1	2	4	2	4	2	1	1	3	2	4	2	4	1	Strongly Disagree	1	1	4	2	4	4	2	4	2	4	2	4	3	2	3	2	4
27	1	Male	1	Single	1	College/University or Above	4	Professional/White Collar Worker	2	PHP 20,000 to 100,000	3	Urban	2	NCR	Yes	1	2	1	2	4	2	5	2	3	2	3	2	4	2	4	1	Disagree	2	1	4	2	4	4	2	4	2	3	2	4	4	2	4	2	3
32	2	Male	1	Single	1	College/University or Above	4	Professional/White Collar Worker	2	PHP 10,000 to 20,000	2	Rural	1	Region V	No	2	2	2	2	4	2	4	2	2	1	3	2	4	2	4	4	Disagree	2	1	3	2	3	3	2	3	2	3	2	3	3	2	4	2	3
19	1	Female	2	Single	1	College/University or Above	4	Student	4	PHP 10,000 or less	1	Urban	2	Region IV-A	No	2	2	2	2	4	2	5	2	1	1	3	2	3	2	1	1	Disagree	2	1	4	2	4	4	2	4	2	4	2	4	3	2	3	2	3
20	1	Male	1	Single	1	College/University or Above	4	Student	4	PHP 10,000 or less	1	Urban	2	NCR	No	2	2	2	2	4	2	2	1	2	1	2	1	3	2	4	1	Strongly Disagree	1	1	3	2	4	4	2	4	2	4	2	4	3	2	3	2	4
23	1	Female	2	Single	1	College/University or Above	4	Professional/White Collar Worker	2	PHP 10,000 to 20,000	2	Urban	2	Region IV-A	No	2	2	2	2	4	2	3	1	2	1	2	1	3	2	4	1	Disagree	2	1	3	2	3	4	2	4	2	4	2	4	3	2	3	2	3
55	4	Female	2	Married	2	College/University or Above	4	Professional/White Collar Worker	2	PHP 20,000 to 100,000	3	Urban	2	Region VII	No	2	2	2	2	4	2	4	2	2	1	2	1	2	1	4	3	Disagree	2	1	3	2	3	4	2	4	2	4	2	4	3	2	3	2	3
40	2	Male	1	Married	2	College/University or Above	4	Professional/White Collar Worker	2	PHP 20,000 to 100,000	3	Rural	1	Region IV-A	No	2	2	1	2	5	3	4	2	3	2	3	2	3	2	4	1	Disagree	2	1	4	2	4	4	2	3	2	4	2	4	3	2	3	2	3
20	1	Female	2	Single	1	College/University or Above	4	Student	4	PHP 20,000 to 100,000	3	Urban	2	NCR	Yes	1	2	2	2	5	3	3	1	2	1	2	1	2	1	1	3	Disagree	2	1	3	2	3	4	2	3	2	3	2	4	3	2	3	2	4
19	1	Male	1	Single	1	College/University or Above	4	Student	4	PHP 10,000 or less	1	Urban	2	Region III	No	2	2	1	2	3	1	5	2	1	1	1	1	3	2	4	3	Strongly Agree	4	2	4	2	4	3	2	4	2	3	2	4	3	2	3	2	3
56	4	Female	2	Single	1	College/University or Above	4	Self-employed	3	PHP 10,000 to 20,000	2	Urban	2	Region VII	No	2	2	1	2	3	1	5	2	1	1	1	1	3	2	4	2	Agree	3	2	4	2	4	3	2	3	2	3	2	3	4	2	3	2	3
19	1	Male	1	Single	1	College/University or Above	4	Student	4	PHP 10,000 or less	1	Rural	1	Region III	No	2	2	1	2	4	2	3	1	1	1	2	1	3	2	4	1	Agree	3	2	3	2	4	4	2	3	2	3	2	3	3	2	3	2	4
53	4	Male	1	Married	2	College/University or Above	4	Self-employed	3	PHP 20,000 to 100,000	3	Urban	2	NCR	No	2	2	1	2	4	2	5	2	3	2	1	1	3	2	4	1	Agree	3	2	4	2	4	4	2	4	2	4	2	4	4	2	4	2	4
57	4	Male	1	Single	1	College/University or Above	4	Professional/White Collar Worker	2	PHP 20,000 to 100,000	3	Urban	2	NCR	No	2	2	2	2	5	3	5	2	3	2	3	2	4	2	4	3	Strongly Disagree	1	1	2	1	1	3	2	1	1	3	2	3	4	2	4	2	2
43	3	Female	2	Single	1	College/University or Above	4	Professional/White Collar Worker	2	PHP 20,000 to 100,000	3	Urban	2	NCR	No	2	2	1	2	4	2	2	1	2	1	2	1	3	2	4	2	Disagree	2	1	3	2	3	3	2	2	1	3	2	3	3	2	3	2	3
24	1	Male	1	Single	1	College/University or Above	4	Student	4	PHP 10,000 or less	1	Urban	2	NCR	Yes	1	2	1	2	5	3	5	2	1	1	3	2	4	2	4	4	Agree	3	2	4	2	4	4	2	4	2	3	2	4	4	2	4	2	2
63	5	Male	1	Married	2	College/University or Above	4	Self-employed	3	PHP 100,000 or more	4	Urban	2	Region III	No	2	2	1	1	5	3	5	2	3	2	2	1	4	2	4	2	Agree	3	2	3	2	3	3	2	3	2	3	2	2	3	2	3	2	2
19	1	Male	1	Single	1	College/University or Above	4	Student	4	PHP 100,000 or more	4	Urban	2	NCR	Yes	1	2	2	2	4	2	3	1	3	2	3	2	3	2	1	2	Strongly Disagree	1	1	3	2	3	3	2	2	1	2	1	2	3	2	3	2	3
28	1	Female	2	Single	1	College/University or Above	4	Professional/White Collar Worker	2	PHP 20,000 to 100,000	3	Urban	2	NCR	Yes	1	2	1	1	4	2	5	2	3	2	3	2	4	2	4	4	Strongly Disagree	1	1	3	2	4	3	2	2	1	4	2	4	4	2	4	2	3
22	1	Male	1	Single	1	College/University or Above	4	Student	4	PHP 10,000 or less	1	Urban	2	Region III	No	2	2	1	2	5	3	5	2	1	1	1	1	4	2	4	2	Strongly Disagree	1	1	3	2	4	4	2	2	1	3	2	3	4	2	4	2	3
58	4	Male	1	Married	2	College/University or Above	4	Self-employed	3	PHP 20,000 to 100,000	3	Urban	2	NCR	Yes	1	2	1	2	5	3	3	1	1	1	1	1	3	2	4	1	Disagree	2	1	3	2	4	4	2	2	1	4	2	4	3	2	3	2	4
70	5	Female	2	Married	2	College/University or Above	4	Self-employed	3	PHP 20,000 to 100,000	3	Urban	2	NCR	Yes	1	2	1	2	4	2	3	1	1	1	3	2	3	2	4	3	Strongly Disagree	1	1	3	2	3	4	2	3	2	4	2	4	3	2	3	2	4
39	2	Female	2	Married	2	College/University or Above	4	Housewife/Retired/Unemployed/Other	5	PHP 10,000 or less	1	Rural	1	Region VII	No	2	2	2	2	4	2	4	2	3	2	3	2	3	2	1	3	Disagree	2	1	2	1	2	3	2	2	1	2	1	2	3	2	3	2	2
27	1	Male	1	Single	1	College/University or Above	4	Self-employed	3	PHP 10,000 or less	1	Urban	2	Region XII	No	2	2	1	2	5	3	4	2	2	1	3	2	3	2	4	1	Disagree	2	1	2	1	2	3	2	2	1	1	1	2	3	2	3	2	2
48	3	Female	2	Single	1	College/University or Above	4	Professional/White Collar Worker	2	PHP 20,000 to 100,000	3	Rural	1	Region IV-A	No	2	2	1	2	3	1	4	2	2	1	3	2	3	2	1	3	Disagree	2	1	3	2	3	3	2	2	1	2	1	2	3	2	3	2	2
56	4	Female	2	Married	2	College/University or Above	4	Housewife/Retired/Unemployed/Other	5	PHP 10,000 or less	1	Urban	2	Region III	No	2	2	1	2	4	2	4	2	1	1	1	1	3	2	4	2	Strongly Disagree	1	1	1	1	2	3	2	3	2	3	2	2	3	2	3	2	3
60	4	Female	2	Married	2	College/University or Above	4	Professional/White Collar Worker	2	PHP 100,000 or more	4	Urban	2	NCR	Yes	1	2	1	2	4	2	5	2	3	2	2	1	4	2	4	3	Strongly Disagree	1	1	2	1	2	4	2	3	2	4	2	4	3	2	3	2	3
53	4	Female	2	Married	2	College/University or Above	4	Professional/White Collar Worker	2	PHP 20,000 to 100,000	3	Urban	2	NCR	Yes	1	2	1	2	4	2	4	2	1	1	1	1	4	2	4	4	Disagree	2	1	4	2	3	4	2	3	2	4	2	4	4	2	4	2	3
37	2	Male	1	Married	2	College/University or Above	4	Professional/White Collar Worker	2	PHP 20,000 to 100,000	3	Urban	2	NCR	Yes	1	2	1	2	4	2	4	2	2	1	3	2	3	2	4	1	Disagree	2	1	4	2	4	4	2	3	2	3	2	4	3	2	3	2	3
52	4	Male	1	Single	1	College/University or Above	4	Professional/White Collar Worker	2	PHP 20,000 to 100,000	3	Urban	2	NCR	Yes	1	2	1	2	4	2	4	2	1	1	2	1	3	2	4	1	Agree	3	2	3	2	3	4	2	2	1	3	2	4	3	2	3	2	2
25	1	Female	2	Single	1	College/University or Above	4	Professional/White Collar Worker	2	PHP 20,000 to 100,000	3	Urban	2	NCR	Yes	1	2	1	2	4	2	5	2	3	2	3	2	4	2	1	4	Agree	3	2	3	2	3	4	2	2	1	4	2	4	3	2	3	2	4
44	3	Female	2	Married	2	College/University or Above	4	Professional/White Collar Worker	2	PHP 20,000 to 100,000	3	Urban	2	Region VI	No	2	2	1	2	4	2	3	1	2	1	1	1	3	2	4	1	Disagree	2	1	2	1	2	3	2	3	2	3	2	3	3	2	3	2	3
43	3	Female	2	Married	2	College/University or Above	4	Professional/White Collar Worker	2	PHP 20,000 to 100,000	3	Urban	2	NCR	Yes	1	2	1	2	4	2	3	1	1	1	2	1	4	2	4	1	Disagree	2	1	3	2	3	4	2	3	2	4	2	4	3	2	3	2	3
76	5	Male	1	Married	2	College/University or Above	4	Housewife/Retired/Unemployed/Other	5	PHP 20,000 to 100,000	3	Urban	2	Region X	No	2	2	1	2	5	3	4	2	3	2	2	1	3	2	4	5	Agree	3	2	3	2	4	4	2	3	2	3	2	3	3	2	3	2	3
46	3	Male	1	Single	1	College/University or Above	4	Self-employed	3	PHP 20,000 to 100,000	3	Urban	2	NCR	No	2	2	1	2	4	2	3	1	1	1	2	1	3	2	4	1	Disagree	2	1	2	1	2	3	2	2	1	3	2	3	3	2	3	2	2
19	1	Male	1	Single	1	College/University or Above	4	Student	4	PHP 10,000 or less	1	Urban	2	Region III	No	2	2	2	2	3	1	4	2	1	1	2	1	3	2	1	3	Agree	3	2	3	2	4	3	2	2	1	3	2	4	4	2	4	2	2
34	2	Male	1	Single	1	College/University or Above	4	Professional/White Collar Worker	2	PHP 20,000 to 100,000	3	Urban	2	NCR	No	2	2	1	2	4	2	4	2	3	2	2	1	3	2	1	1	Agree	3	2	3	2	3	3	2	2	1	3	2	3	4	2	4	2	2
51	4	Female	2	Single	1	College/University or Above	4	Professional/White Collar Worker	2	PHP 20,000 to 100,000	3	Urban	2	Region VI	No	2	2	1	2	5	3	4	2	2	1	2	1	3	2	1	1	Disagree	2	1	2	1	2	3	2	2	1	3	2	3	3	2	3	2	3
26	1	Male	1	Single	1	College/University or Above	4	Professional/White Collar Worker	2	PHP 20,000 to 100,000	3	Urban	2	Region III	No	2	1	1	2	4	2	4	2	1	1	1	1	3	2	4	4	Disagree	2	1	4	2	4	3	2	2	1	3	2	4	4	2	4	2	3
21	1	Female	2	Single	1	College/University or Above	4	Professional/White Collar Worker	2	PHP 10,000 to 20,000	2	Rural	1	Region VIII	No	2	2	1	2	4	2	3	1	3	2	3	2	3	2	1	3	Disagree	2	1	3	2	3	3	2	2	1	3	2	3	3	2	3	2	4
58	4	Female	2	Married	2	College/University or Above	4	Professional/White Collar Worker	2	PHP 20,000 to 100,000	3	Rural	1	Region IV-B	No	2	2	1	2	4	2	3	1	2	1	3	2	4	2	4	2	Disagree	2	1	3	2	3	3	2	2	1	3	2	3	3	2	3	2	3
19	1	Male	1	Single	1	College/University or Above	4	Student	4	PHP 10,000 or less	1	Urban	2	NCR	No	2	2	1	2	4	2	3	1	1	1	2	1	2	1	1	3	Disagree	2	1	3	2	3	3	2	2	1	3	2	3	3	2	3	2	4
43	3	Male	1	Married	2	College/University or Above	4	Self-employed	3	PHP 100,000 or more	4	Urban	2	Region XI	No	2	2	2	2	4	2	4	2	2	1	3	2	4	2	4	3	Strongly Disagree	1	1	3	2	3	3	2	2	1	3	2	3	4	2	4	2	4
55	4	Female	2	Married	2	College/University or Above	4	Professional/White Collar Worker	2	PHP 100,000 or more	4	Urban	2	NCR	No	2	2	1	1	4	2	4	2	2	1	2	1	3	2	1	1	Agree	3	2	3	2	4	4	2	2	1	3	2	4	3	2	3	2	3
30	1	Male	1	Single	1	College/University or Above	4	Professional/White Collar Worker	2	PHP 20,000 to 100,000	3	Urban	2	NCR	No	2	2	1	2	5	3	5	2	1	1	1	1	4	2	4	2	Agree	3	2	3	2	3	3	2	1	1	3	2	3	3	2	3	2	3
70	5	Female	2	Married	2	College/University or Above	4	Housewife/Retired/Unemployed/Other	5	PHP 10,000 or less	1	Urban	2	NCR	No	2	1	1	1	4	2	4	2	2	1	2	1	3	2	4	1	Disagree	2	1	2	1	2	4	2	3	2	4	2	3	3	2	3	2	3
55	4	Female	2	Married	2	College/University or Above	4	Professional/White Collar Worker	2	PHP 20,000 to 100,000	3	Urban	2	NCR	No	2	2	1	2	5	3	4	2	1	1	3	2	4	2	4	5	Disagree	2	1	2	1	3	3	2	3	2	3	2	3	3	2	3	2	3
59	4	Female	2	Married	2	College/University or Above	4	Professional/White Collar Worker	2	PHP 100,000 or more	4	Urban	2	NCR	Yes	1	2	1	1	3	1	4	2	1	1	3	2	4	2	4	4	Strongly Disagree	1	1	3	2	3	4	2	3	2	4	2	4	3	2	3	2	3
33	2	Female	2	Married	2	College/University or Above	4	Professional/White Collar Worker	2	PHP 10,000 to 20,000	2	Urban	2	NCR	No	2	2	1	2	3	1	5	2	2	1	3	2	3	2	1	2	Disagree	2	1	3	2	3	4	2	3	2	4	2	4	3	2	3	2	3
20	1	Female	2	Single	1	College/University or Above	4	Student	4	PHP 10,000 to 20,000	2	Rural	1	Region IV-A	No	2	2	1	2	4	2	5	2	2	1	3	2	3	2	4	3	Disagree	2	1	4	2	4	3	2	4	2	4	2	4	4	2	4	2	3
23	1	Male	1	Single	1	College/University or Above	4	Professional/White Collar Worker	2	PHP 10,000 or less	1	Urban	2	Region VI	No	2	2	1	2	4	2	4	2	3	2	3	2	3	2	1	3	Disagree	2	1	3	2	3	4	2	3	2	3	2	3	3	2	3	2	3
20	1	Female	2	Single	1	College/University or Above	4	Student	4	PHP 10,000 or less	1	Rural	1	Region I	No	2	2	2	2	4	2	4	2	2	1	2	1	3	2	4	3	Strongly Disagree	1	1	3	2	3	3	2	3	2	3	2	4	3	2	3	2	3
35	2	Female	2	Single	1	College/University or Above	4	Professional/White Collar Worker	2	PHP 20,000 to 100,000	3	Rural	1	Region XII	No	2	2	1	2	5	3	4	2	3	2	3	2	3	2	1	1	Disagree	2	1	3	2	4	3	2	3	2	3	2	4	3	2	3	2	3
24	1	Female	2	Single	1	College/University or Above	4	Professional/White Collar Worker	2	PHP 20,000 to 100,000	3	Urban	2	NCR	Yes	1	2	1	2	5	3	5	2	3	2	3	2	3	2	1	3	Disagree	2	1	3	2	4	4	2	3	2	3	2	4	3	2	3	2	3
46	3	Female	2	Single	1	College/University or Above	4	Professional/White Collar Worker	2	PHP 20,000 to 100,000	3	Urban	2	NCR	Yes	1	2	1	2	5	3	4	2	2	1	3	2	3	2	3	2	Disagree	2	1	4	2	4	4	2	3	2	4	2	4	4	2	4	2	3
32	2	Male	1	Single	1	College/University or Above	4	Professional/White Collar Worker	2	PHP 10,000 or less	1	Rural	1	Region VI	No	2	2	1	2	4	2	4	2	3	2	3	2	3	2	1	2	Agree	3	2	3	2	3	3	2	3	2	3	2	3	3	2	3	2	3
21	1	Male	1	Single	1	College/University or Above	4	Student	4	PHP 10,000 or less	1	Urban	2	NCR	Yes	1	2	1	2	4	2	4	2	2	1	2	1	4	2	4	3	Agree	3	2	4	2	4	4	2	3	2	4	2	3	4	2	3	2	3
24	1	Male	1	Single	1	College/University or Above	4	Professional/White Collar Worker	2	PHP 20,000 to 100,000	3	Urban	2	CAR	No	2	2	1	2	4	2	3	1	2	1	3	2	3	2	4	3	Agree	3	2	3	2	3	4	2	3	2	3	2	4	3	2	4	2	4
38	2	Female	2	Married	2	College/University or Above	4	Professional/White Collar Worker	2	PHP 20,000 to 100,000	3	Urban	2	Region III	No	2	2	1	2	4	2	4	2	2	1	2	1	2	1	1	3	Agree	3	2	4	2	4	4	2	3	2	4	2	4	3	2	3	2	3
74	5	Male	1	Married	2	College/University or Above	4	Self-employed	3	PHP 20,000 to 100,000	3	Urban	2	NCR	Yes	1	2	1	2	4	2	5	2	2	1	2	1	4	2	4	3	Strongly Agree	4	2	4	2	4	4	2	4	2	4	2	4	3	2	3	2	4
67	5	Female	2	Married	2	College/University or Above	4	Housewife/Retired/Unemployed/Other	5	PHP 20,000 to 100,000	3	Urban	2	NCR	No	2	2	1	2	4	2	4	2	2	1	2	1	3	2	4	3	Agree	3	2	4	2	4	4	2	4	2	4	2	4	3	2	4	2	3
54	4	Female	2	Single	1	College/University or Above	4	Professional/White Collar Worker	2	PHP 10,000 to 20,000	2	Urban	2	NCR	Yes	1	2	1	2	5	3	4	2	3	2	3	2	3	2	1	2	Agree	3	2	4	2	4	4	2	4	2	4	2	4	3	2	3	2	3
18	1	Male	1	Single	1	College/University or Above	4	Student	4	PHP 20,000 to 100,000	3	Urban	2	NCR	No	2	2	1	2	5	3	5	2	3	2	3	2	4	2	1	4	Strongly Agree	4	2	4	2	4	4	2	4	2	4	2	4	4	2	4	2	4
55	4	Male	1	Married	2	College/University or Above	4	Professional/White Collar Worker	2	PHP 100,000 or more	4	Urban	2	Region VI	No	2	2	1	1	5	3	1	1	4	2	4	2	1	1	2	1	Disagree	2	1	3	2	3	3	2	2	1	3	2	3	3	2	2	1	4
52	4	Female	2	Married	2	College/University or Above	4	Professional/White Collar Worker	2	PHP 20,000 to 100,000	3	Urban	2	Region X	No	2	2	1	1	4	2	4	2	1	1	1	1	3	2	4	4	Disagree	2	1	3	2	3	3	2	2	1	3	2	3	3	2	2	1	2
63	5	Female	2	Married	2	College/University or Above	4	Housewife/Retired/Unemployed/Other	5	PHP 10,000 to 20,000	2	Urban	2	Region VII	No	2	2	2	2	4	2	3	1	2	1	3	2	3	2	3	2	Disagree	2	1	4	2	4	4	2	3	2	4	2	4	3	2	3	2	4
63	5	Female	2	Married	2	College/University or Above	4	Professional/White Collar Worker	2	PHP 100,000 or more	4	Urban	2	NCR	Yes	1	2	1	1	3	1	4	2	2	1	1	1	3	2	1	4	Disagree	2	1	4	2	4	4	2	2	1	4	2	4	2	1	2	1	4
27	1	Male	1	Single	1	College/University or Above	4	Professional/White Collar Worker	2	PHP 20,000 to 100,000	3	Rural	1	Region IV-A	No	2	2	2	1	4	2	4	2	2	1	2	1	2	1	1	3	Disagree	2	1	3	2	4	4	2	3	2	1	1	4	2	1	3	2	4
22	1	Female	2	Single	1	College/University or Above	4	Student	4	PHP 10,000 or less	1	Urban	2	NCR	No	2	2	2	2	2	1	4	2	1	1	2	1	3	2	1	2	Agree	3	2	3	2	4	4	2	2	1	3	2	4	3	2	3	2	4
54	4	Female	2	Single	1	College/University or Above	4	Housewife/Retired/Unemployed/Other	5	PHP 100,000 or more	4	Urban	2	NCR	No	2	2	1	2	3	1	3	1	2	1	1	1	2	1	1	4	Disagree	2	1	3	2	3	3	2	3	2	4	2	4	3	2	3	2	3
64	5	Female	2	Single	1	College/University or Above	4	Housewife/Retired/Unemployed/Other	5	PHP 100,000 or more	4	Rural	1	Region VI	No	2	2	1	1	4	2	4	2	1	1	1	1	3	2	1	1	Disagree	2	1	3	2	3	4	2	4	2	4	2	4	4	2	4	2	4
50	3	Female	2	Single	1	College/University or Above	4	Professional/White Collar Worker	2	PHP 10,000 to 20,000	2	Urban	2	Region VII	No	2	2	1	2	4	2	4	2	2	1	2	1	2	1	1	2	Agree	3	2	3	2	3	3	2	2	1	4	2	4	4	2	4	2	4
58	4	Female	2	Married	2	College/University or Above	4	Housewife/Retired/Unemployed/Other	5	PHP 20,000 to 100,000	3	Urban	2	NCR	Yes	1	2	1	1	3	1	4	2	1	1	3	2	4	2	4	3	Strongly Disagree	1	1	2	1	2	4	2	1	1	4	2	4	3	2	3	2	4
18	1	Male	1	Single	1	College/University or Above	4	Student	4	PHP 10,000 or less	1	Urban	2	NCR	Yes	1	2	1	2	4	2	3	1	2	1	2	1	2	1	1	3	Strongly Disagree	1	1	3	2	3	3	2	3	2	3	2	3	3	2	3	2	3
23	1	Male	1	Single	1	College/University or Above	4	Student	4	PHP 10,000 or less	1	Urban	2	Region X	No	2	2	1	2	4	2	4	2	1	1	1	1	3	2	4	4	Disagree	2	1	4	2	4	4	2	3	2	4	2	4	3	2	4	2	4
21	1	Female	2	Single	1	College/University or Above	4	Student	4	PHP 10,000 or less	1	Rural	1	Region IV-A	No	2	2	1	2	4	2	3	1	2	1	3	2	3	2	4	3	Disagree	2	1	3	2	3	4	2	3	2	3	2	4	2	1	2	1	3
64	5	Male	1	Married	2	College/University or Above	4	Professional/White Collar Worker	2	PHP 20,000 to 100,000	3	Urban	2	Region IV-A	No	2	2	1	2	5	3	2	1	1	1	1	1	2	1	1	1	Disagree	2	1	3	2	3	4	2	3	2	3	2	3	2	1	2	1	3
21	1	Male	1	Single	1	College/University or Above	4	Professional/White Collar Worker	2	PHP 10,000 to 20,000	2	Rural	1	Region III	No	2	2	2	2	4	2	3	1	2	1	2	1	3	2	1	1	Disagree	2	1	3	2	3	4	2	4	2	4	2	4	2	1	3	2	4
22	1	Male	1	Single	1	College/University or Above	4	Housewife/Retired/Unemployed/Other	5	PHP 10,000 or less	1	Rural	1	Region I	No	2	2	1	2	5	3	3	1	1	1	3	2	3	2	4	1	Disagree	2	1	3	2	3	2	1	2	1	2	1	3	3	2	3	2	3
21	1	Female	2	Single	1	College/University or Above	4	Student	4	PHP 10,000 or less	1	Urban	2	NCR	No	2	1	1	2	4	2	4	2	1	1	2	1	4	2	4	1	Disagree	2	1	2	1	2	3	2	2	1	2	1	2	3	2	3	2	4
67	5	Male	1	Married	2	College/University or Above	4	Housewife/Retired/Unemployed/Other	5	PHP 20,000 to 100,000	3	Urban	2	Region IV-A	No	2	2	1	1	4	2	3	1	2	1	2	1	3	2	1	1	Strongly Disagree	1	1	1	1	1	3	2	3	2	1	1	1	3	2	3	2	4
26	1	Female	2	Single	1	College/University or Above	4	Professional/White Collar Worker	2	PHP 10,000 to 20,000	2	Rural	1	Region III	No	2	2	2	2	5	3	3	1	2	1	2	1	2	1	1	1	Strongly Disagree	1	1	1	1	1	3	2	3	2	2	1	2	3	2	3	2	4
39	2	Female	2	Married	2	College/University or Above	4	Professional/White Collar Worker	2	PHP 10,000 to 20,000	2	Rural	1	Region III	No	2	2	2	2	5	3	4	2	3	2	3	2	4	2	1	1	Strongly Disagree	1	1	1	1	1	3	2	2	1	3	2	3	3	2	3	2	3
51	4	Female	2	Married	2	College/University or Above	4	Professional/White Collar Worker	2	PHP 20,000 to 100,000	3	Urban	2	NCR	No	2	2	1	2	3	1	3	1	2	1	2	1	3	2	4	3	Disagree	2	1	3	2	3	3	2	2	1	3	2	3	3	2	3	2	4
19	1	Female	2	Single	1	College/University or Above	4	Student	4	PHP 10,000 to 20,000	2	Urban	2	Region VI	No	2	2	1	2	4	2	5	2	3	2	3	2	3	2	1	5	Strongly Disagree	1	1	4	2	4	4	2	2	1	4	2	4	4	2	4	2	4
21	1	Female	2	Single	1	College/University or Above	4	Professional/White Collar Worker	2	PHP 10,000 or less	1	Urban	2	Region VI	No	2	2	2	2	4	2	3	1	2	1	2	1	3	2	4	1	Strongly Disagree	1	1	3	2	3	3	2	2	1	3	2	2	3	2	3	2	4
51	4	Female	2	Married	2	College/University or Above	4	Professional/White Collar Worker	2	PHP 20,000 to 100,000	3	Rural	1	Region IV-A	No	2	2	1	2	5	3	4	2	2	1	2	1	3	2	4	1	Disagree	2	1	3	2	3	4	2	1	1	4	2	4	3	2	3	2	3
25	1	Female	2	Single	1	College/University or Above	4	Professional/White Collar Worker	2	PHP 20,000 to 100,000	3	Urban	2	NCR	No	2	2	1	2	4	2	4	2	2	1	2	1	2	1	1	3	Agree	3	2	4	2	4	4	2	2	1	4	2	4	3	2	3	2	3
28	1	Female	2	Married	2	College/University or Above	4	Professional/White Collar Worker	2	PHP 20,000 to 100,000	3	Urban	2	NCR	No	2	2	1	2	4	2	5	2	1	1	2	1	3	2	4	2	Agree	3	2	3	2	3	3	2	2	1	3	2	3	4	2	4	2	4
26	1	Male	1	Single	1	College/University or Above	4	Professional/White Collar Worker	2	PHP 10,000 to 20,000	2	Urban	2	Region VII	No	2	2	2	2	4	2	3	1	2	1	2	1	2	1	1	2	Disagree	2	1	2	1	2	3	2	3	2	4	2	4	3	2	3	2	3
22	1	Male	1	Single	1	College/University or Above	4	Student	4	PHP 10,000 or less	1	Rural	1	Region VII	No	2	1	1	2	5	3	4	2	3	2	3	2	3	2	1	3	Disagree	2	1	2	1	3	4	2	3	2	3	2	4	3	2	3	2	4
63	5	Female	2	Married	2	College/University or Above	4	Housewife/Retired/Unemployed/Other	5	PHP 10,000 or less	1	Urban	2	NCR	Yes	1	2	1	1	4	2	4	2	2	1	2	1	3	2	4	1	Disagree	2	1	4	2	4	4	2	3	2	4	2	4	3	2	3	2	3
64	5	Female	2	Married	2	College/University or Above	4	Professional/White Collar Worker	2	PHP 20,000 to 100,000	3	Urban	2	NCR	No	2	2	1	1	4	2	4	2	2	1	2	1	3	2	4	4	Disagree	2	1	3	2	4	4	2	4	2	4	2	3	3	2	3	2	3
65	5	Female	2	Married	2	College/University or Above	4	Housewife/Retired/Unemployed/Other	5	PHP 20,000 to 100,000	3	Urban	2	NCR	No	2	2	1	1	4	2	5	2	2	1	2	1	3	2	4	2	Disagree	2	1	4	2	4	4	2	3	2	4	2	4	3	2	3	2	4
21	1	Female	2	Single	1	College/University or Above	4	Student	4	PHP 10,000 or less	1	Urban	2	NCR	No	2	2	1	2	4	2	5	2	4	2	4	2	4	2	1	1	Disagree	2	1	4	2	4	4	2	4	2	4	2	4	4	2	4	2	3
34	2	Female	2	Single	1	College/University or Above	4	Professional/White Collar Worker	2	PHP 20,000 to 100,000	3	Urban	2	Region VI	No	2	2	1	2	4	2	4	2	1	1	3	2	3	2	4	1	Disagree	2	1	3	2	3	4	2	4	2	3	2	4	3	2	3	2	3
46	3	Female	2	Married	2	College/University or Above	4	Professional/White Collar Worker	2	PHP 20,000 to 100,000	3	Urban	2	NCR	No	2	2	2	2	4	2	3	1	1	1	2	1	3	2	4	3	Strongly Disagree	1	1	3	2	3	3	2	3	2	3	2	4	3	2	3	2	3
19	1	Female	2	Single	1	College/University or Above	4	Student	4	PHP 20,000 to 100,000	3	Urban	2	Region III	No	2	2	2	2	4	2	3	1	1	1	1	1	3	2	4	4	Disagree	2	1	3	2	4	4	2	4	2	4	2	4	4	2	3	2	3
54	4	Female	2	Married	2	College/University or Above	4	Professional/White Collar Worker	2	PHP 20,000 to 100,000	3	Rural	1	Region VII	No	2	2	1	2	5	3	4	2	2	1	3	2	4	2	4	2	Disagree	2	1	3	2	3	3	2	3	2	3	2	3	3	2	3	2	3
45	3	Female	2	Single	1	College/University or Above	4	Professional/White Collar Worker	2	PHP 20,000 to 100,000	3	Rural	1	Region X	No	2	2	2	2	5	3	2	1	1	1	2	1	2	1	1	1	Disagree	2	1	4	2	4	4	2	4	2	4	2	4	3	2	3	2	4
66	5	Female	2	Married	2	College/University or Above	4	Housewife/Retired/Unemployed/Other	5	PHP 20,000 to 100,000	3	Urban	2	Region III	No	2	2	1	1	3	1	3	1	2	1	2	1	2	1	1	1	Agree	3	2	4	2	4	4	2	3	2	4	2	4	3	2	3	2	4
20	1	Male	1	Single	1	College/University or Above	4	Student	4	PHP 10,000 or less	1	Urban	2	NCR	No	2	2	1	2	4	2	4	2	2	1	2	1	3	2	4	2	Agree	3	2	4	2	4	4	2	4	2	4	2	4	4	2	4	2	4
19	1	Female	2	Single	1	College/University or Above	4	Student	4	PHP 20,000 to 100,000	3	Rural	1	Region IV-A	No	2	2	2	2	4	2	4	2	1	1	1	1	4	2	4	3	Agree	3	2	4	2	4	4	2	3	2	4	2	4	3	2	3	2	3
30	1	Female	2	Single	1	College/University or Above	4	Professional/White Collar Worker	2	PHP 10,000 to 20,000	2	Urban	2	Region IV-A	No	2	2	1	2	5	3	5	2	2	1	3	2	3	2	1	5	Agree	3	2	3	2	4	4	2	3	2	4	2	4	4	2	4	2	4
36	2	Female	2	Married	2	College/University or Above	4	Professional/White Collar Worker	2	PHP 20,000 to 100,000	3	Urban	2	Region XI	No	2	2	1	2	5	3	4	2	3	2	3	2	3	2	1	3	Agree	3	2	4	2	4	3	2	3	2	3	2	4	3	2	3	2	4
56	4	Female	2	Married	2	College/University or Above	4	Professional/White Collar Worker	2	PHP 20,000 to 100,000	3	Urban	2	Region IV-A	No	2	2	1	2	5	3	4	2	2	1	3	2	3	2	4	1	Agree	3	2	3	2	4	4	2	3	2	3	2	3	3	2	3	2	4
22	1	Male	1	Single	1	College/University or Above	4	Professional/White Collar Worker	2	PHP 10,000 to 20,000	2	Rural	1	Region VIII	No	2	2	1	2	4	2	4	2	3	2	3	2	3	2	4	3	Disagree	2	1	1	1	3	2	1	2	1	2	1	4	3	2	3	2	3
71	5	Female	2	Married	2	College/University or Above	4	Housewife/Retired/Unemployed/Other	5	PHP 100,000 or more	4	Urban	2	NCR	No	2	2	1	2	4	2	3	1	1	1	1	1	3	2	4	1	Strongly Disagree	1	1	2	1	3	3	2	1	1	3	2	3	3	2	3	2	3
19	1	Female	2	Single	1	College/University or Above	4	Student	4	PHP 10,000 or less	1	Urban	2	NCR	Yes	1	2	2	2	4	2	3	1	3	2	3	2	2	1	1	4	Disagree	2	1	3	2	4	3	2	3	2	3	2	3	3	2	3	2	3
66	5	Male	1	Married	2	College/University or Above	4	Housewife/Retired/Unemployed/Other	5	PHP 10,000 to 20,000	2	Urban	2	NCR	No	2	2	1	1	4	2	5	2	2	1	2	1	3	2	4	3	Strongly Disagree	1	1	3	2	3	4	2	3	2	4	2	3	4	2	4	2	2
39	2	Male	1	Married	2	College/University or Above	4	Blue Collar Worker	1	PHP 20,000 to 100,000	3	Urban	2	Region VI	No	2	2	2	2	5	3	3	1	2	1	2	1	3	2	1	1	Disagree	2	1	2	1	2	3	2	2	1	3	2	3	3	2	3	2	3
53	4	Female	2	Married	2	College/University or Above	4	Professional/White Collar Worker	2	PHP 100,000 or more	4	Urban	2	Region I	No	2	2	1	1	4	2	5	2	1	1	2	1	4	2	4	1	Disagree	2	1	4	2	4	4	2	3	2	4	2	4	4	2	4	2	3
47	3	Male	1	Married	2	College/University or Above	4	Self-employed	3	PHP 100,000 or more	4	Urban	2	NCR	Yes	1	1	1	2	5	3	3	1	3	2	3	2	3	2	1	2	Disagree	2	1	3	2	3	3	2	3	2	3	2	3	3	2	3	2	3
37	2	Female	2	Married	2	College/University or Above	4	Housewife/Retired/Unemployed/Other	5	PHP 20,000 to 100,000	3	Urban	2	NCR	Yes	1	2	1	2	5	3	2	1	3	2	3	2	2	1	2	1	Disagree	2	1	2	1	2	3	2	2	1	3	2	4	2	1	2	1	4
56	4	Female	2	Married	2	College/University or Above	4	Housewife/Retired/Unemployed/Other	5	PHP 10,000 or less	1	Urban	2	NCR	Yes	1	2	1	2	4	2	4	2	2	1	2	1	2	1	1	3	Agree	3	2	3	2	3	4	2	2	1	3	2	3	2	1	2	1	4
21	1	Female	2	Single	1	College/University or Above	4	Student	4	PHP 10,000 or less	1	Urban	2	Region III	No	2	2	2	2	2	1	3	1	1	1	2	1	2	1	1	2	Disagree	2	1	2	1	3	3	2	2	1	2	1	3	3	2	3	2	4
71	5	Female	2	Married	2	College/University or Above	4	Professional/White Collar Worker	2	PHP 20,000 to 100,000	3	Urban	2	NCR	No	2	2	2	1	4	2	4	2	1	1	2	1	3	2	4	2	Agree	3	2	3	2	3	2	1	2	1	3	2	3	3	2	3	2	3
44	3	Male	1	Married	2	College/University or Above	4	Self-employed	3	PHP 20,000 to 100,000	3	Urban	2	NCR	No	2	2	1	2	4	2	3	1	1	1	2	1	3	2	4	1	Disagree	2	1	3	2	4	3	2	2	1	3	2	4	3	2	3	2	3
68	5	Female	2	Married	2	College/University or Above	4	Housewife/Retired/Unemployed/Other	5	PHP 100,000 or more	4	Urban	2	NCR	No	2	2	1	2	4	2	3	1	2	1	2	1	3	2	4	1	Agree	3	2	3	2	3	3	2	2	1	3	2	2	3	2	3	2	3
57	4	Female	2	Married	2	College/University or Above	4	Professional/White Collar Worker	2	PHP 100,000 or more	4	Urban	2	NCR	No	2	2	1	2	4	2	4	2	1	1	1	1	4	2	4	3	Strongly Disagree	1	1	3	2	3	4	2	3	2	4	2	4	4	2	4	2	3
19	1	Male	1	Single	1	College/University or Above	4	Student	4	PHP 10,000 or less	1	Rural	1	Region VI	No	2	2	2	2	4	2	4	2	3	2	3	2	4	2	4	2	Disagree	2	1	3	2	3	4	2	4	2	3	2	4	3	2	3	2	4
50	3	Female	2	Married	2	College/University or Above	4	Housewife/Retired/Unemployed/Other	5	PHP 10,000 or less	1	Urban	2	NCR	No	2	2	1	2	5	3	5	2	1	1	1	1	4	2	4	1	Disagree	2	1	4	2	4	4	2	4	2	4	2	4	4	2	4	2	4
46	3	Female	2	Married	2	College/University or Above	4	Professional/White Collar Worker	2	PHP 20,000 to 100,000	3	Urban	2	NCR	No	2	2	1	2	5	3	4	2	1	1	2	1	4	2	4	2	Disagree	2	1	3	2	3	4	2	3	2	4	2	4	3	2	3	2	3
67	5	Male	1	Married	2	College/University or Above	4	Housewife/Retired/Unemployed/Other	5	PHP 10,000 to 20,000	2	Urban	2	Region IV-A	No	2	2	2	1	4	2	3	1	1	1	2	1	3	2	4	3	Agree	3	2	3	2	3	3	2	3	2	3	2	3	3	2	3	2	3
31	2	Male	1	Single	1	College/University or Above	4	Professional/White Collar Worker	2	PHP 20,000 to 100,000	3	Urban	2	Region VI	No	2	2	1	2	4	2	5	2	1	1	4	2	4	2	4	1	Disagree	2	1	2	1	2	4	2	4	2	4	2	4	2	1	3	2	3
79	5	Female	2	Married	2	College/University or Above	4	Housewife/Retired/Unemployed/Other	5	PHP 100,000 or more	4	Urban	2	NCR	Yes	1	2	1	2	4	2	5	2	1	1	1	1	3	2	4	1	Disagree	2	1	2	1	2	3	2	2	1	3	2	3	3	2	3	2	3
18	1	Female	2	Single	1	College/University or Above	4	Student	4	PHP 10,000 or less	1	Urban	2	NCR	No	2	2	1	2	4	2	3	1	2	1	3	2	3	2	1	5	Disagree	2	1	3	2	4	3	2	2	1	3	2	4	4	2	4	2	3
19	1	Female	2	Single	1	College/University or Above	4	Student	4	PHP 10,000 to 20,000	2	Urban	2	Region IV-A	No	2	2	2	2	3	1	4	2	1	1	1	1	4	2	1	2	Strongly Disagree	1	1	3	2	4	4	2	3	2	4	2	4	4	2	4	2	3
28	1	Female	2	Single	1	College/University or Above	4	Professional/White Collar Worker	2	PHP 20,000 to 100,000	3	Urban	2	Region IX	No	2	2	1	2	5	3	4	2	3	2	3	2	3	2	4	3	Disagree	2	1	3	2	3	3	2	3	2	3	2	4	3	2	3	2	3
69	5	Female	2	Single	1	College/University or Above	4	Professional/White Collar Worker	2	PHP 10,000 to 20,000	2	Urban	2	NCR	No	2	2	1	1	4	2	2	1	1	1	1	1	3	2	4	1	Agree	3	2	3	2	3	4	2	4	2	4	2	4	3	2	3	2	3
35	2	Female	2	Single	1	College/University or Above	4	Professional/White Collar Worker	2	PHP 20,000 to 100,000	3	Rural	1	Region I	No	2	2	1	1	4	2	4	2	3	2	3	2	3	2	4	4	Disagree	2	1	3	2	2	3	2	2	1	3	2	3	3	2	3	2	2
72	5	Female	2	Married	2	College/University or Above	4	Housewife/Retired/Unemployed/Other	5	PHP 100,000 or more	4	Urban	2	NCR	No	2	2	2	2	4	2	4	2	1	1	1	1	3	2	4	1	Disagree	2	1	2	1	3	4	2	2	1	3	2	3	3	2	3	2	3
42	3	Male	1	Married	2	College/University or Above	4	Professional/White Collar Worker	2	PHP 100,000 or more	4	Urban	2	NCR	No	2	2	1	2	4	2	4	2	1	1	1	1	3	2	4	3	Strongly Disagree	1	1	3	2	3	4	2	3	2	4	2	4	3	2	3	2	3
26	1	Male	1	Single	1	College/University or Above	4	Professional/White Collar Worker	2	PHP 20,000 to 100,000	3	Rural	1	Region VIII	No	2	2	1	2	4	2	4	2	2	1	1	1	4	2	1	4	Agree	3	2	4	2	4	4	2	3	2	4	2	4	4	2	4	2	3
19	1	Male	1	Single	1	College/University or Above	4	Student	4	PHP 10,000 or less	1	Rural	1	Region I	No	2	2	1	2	4	2	3	1	2	1	2	1	3	2	4	3	Strongly Disagree	1	1	2	1	3	4	2	2	1	4	2	4	3	2	3	2	3
27	1	Male	1	Single	1	College/University or Above	4	Housewife/Retired/Unemployed/Other	5	PHP 10,000 or less	1	Rural	1	Region II	No	2	2	1	2	4	2	4	2	1	1	3	2	4	2	4	1	Disagree	2	1	4	2	4	4	2	3	2	4	2	4	4	2	4	2	3
40	2	Female	2	Single	1	College/University or Above	4	Professional/White Collar Worker	2	PHP 100,000 or more	4	Urban	2	NCR	No	2	2	1	2	4	2	3	1	2	1	3	2	3	2	4	1	Disagree	2	1	3	2	3	4	2	3	2	4	2	4	3	2	3	2	4
31	2	Female	2	Single	1	College/University or Above	4	Professional/White Collar Worker	2	PHP 20,000 to 100,000	3	Urban	2	NCR	Yes	1	2	2	2	4	2	4	2	2	1	2	1	3	2	1	3	Agree	3	2	4	2	4	4	2	3	2	4	2	4	3	2	3	2	4
26	1	Female	2	Single	1	College/University or Above	4	Professional/White Collar Worker	2	PHP 10,000 to 20,000	2	Rural	1	Region IV-A	No	2	2	1	2	2	1	3	1	2	1	2	1	3	2	4	1	Disagree	2	1	3	2	4	4	2	2	1	4	2	4	4	2	4	2	2
37	2	Female	2	Single	1	College/University or Above	4	Professional/White Collar Worker	2	PHP 20,000 to 100,000	3	Urban	2	Region III	No	2	2	1	2	4	2	5	2	1	1	1	1	4	2	4	1	Disagree	2	1	3	2	3	3	2	2	1	3	2	3	3	2	3	2	1
21	1	Female	2	Single	1	College/University or Above	4	Student	4	PHP 10,000 or less	1	Rural	1	Region VIII	No	2	2	1	2	5	3	5	2	1	1	2	1	4	2	1	3	Disagree	2	1	4	2	4	3	2	2	1	4	2	4	4	2	4	2	2
20	1	Female	2	Single	1	College/University or Above	4	Student	4	PHP 10,000 or less	1	Urban	2	NCR	Yes	1	2	1	2	4	2	4	2	1	1	2	1	3	2	4	3	Agree	3	2	3	2	3	4	2	3	2	3	2	3	4	2	3	2	2
21	1	Male	1	Single	1	College/University or Above	4	Student	4	PHP 10,000 or less	1	Urban	2	NCR	No	2	2	1	2	5	3	4	2	1	1	1	1	3	2	4	4	Agree	3	2	4	2	4	3	2	3	2	4	2	4	4	2	4	2	2
70	5	Female	2	Married	2	College/University or Above	4	Housewife/Retired/Unemployed/Other	5	PHP 20,000 to 100,000	3	Rural	1	Region IV-A	No	2	2	1	2	4	2	3	1	1	1	1	1	2	1	1	2	Disagree	2	1	2	1	3	3	2	2	1	3	2	3	2	1	2	1	3
67	5	Female	2	Married	2	College/University or Above	4	Housewife/Retired/Unemployed/Other	5	PHP 20,000 to 100,000	3	Urban	2	NCR	No	2	2	2	2	5	3	3	1	2	1	2	1	3	2	1	2	Disagree	2	1	3	2	2	4	2	2	1	4	2	2	2	1	2	1	3
61	5	Female	2	Married	2	College/University or Above	4	Housewife/Retired/Unemployed/Other	5	PHP 10,000 or less	1	Urban	2	Region XI	No	2	2	2	2	4	2	3	1	2	1	2	1	2	1	1	2	Disagree	2	1	2	1	2	2	1	3	2	3	2	3	2	1	2	1	3
46	3	Female	2	Married	2	College/University or Above	4	Professional/White Collar Worker	2	PHP 20,000 to 100,000	3	Urban	2	NCR	No	2	2	1	2	3	1	3	1	2	1	2	1	2	1	1	2	Disagree	2	1	2	1	2	4	2	3	2	4	2	4	2	1	2	1	3
53	4	Female	2	Married	2	College/University or Above	4	Professional/White Collar Worker	2	PHP 20,000 to 100,000	3	Urban	2	Region VII	No	2	2	1	2	4	2	4	2	3	2	3	2	3	2	1	2	Disagree	2	1	3	2	3	3	2	3	2	3	2	3	2	1	2	1	3
69	5	Female	2	Married	2	College/University or Above	4	Housewife/Retired/Unemployed/Other	5	PHP 20,000 to 100,000	3	Urban	2	NCR	Yes	1	2	2	1	4	2	3	1	2	1	2	1	2	1	4	4	Agree	3	2	3	2	3	3	2	3	2	3	2	3	2	1	2	1	3
18	1	Female	2	Single	1	College/University or Above	4	Student	4	PHP 20,000 to 100,000	3	Urban	2	NCR	No	2	2	1	2	4	2	3	1	2	1	3	2	3	2	4	3	Disagree	2	1	3	2	4	4	2	3	2	4	2	4	3	2	2	1	3
21	1	Female	2	Single	1	College/University or Above	4	Student	4	PHP 20,000 to 100,000	3	Urban	2	NCR	Yes	1	2	1	2	5	3	4	2	2	1	3	2	3	2	1	3	Disagree	2	1	3	2	4	3	2	3	2	3	2	4	3	2	2	1	3
23	1	Male	1	Single	1	College/University or Above	4	Professional/White Collar Worker	2	PHP 10,000 to 20,000	2	Urban	2	Region V	No	2	2	1	2	3	1	3	1	1	1	1	1	3	2	4	3	Strongly Agree	4	2	4	2	4	4	2	4	2	4	2	4	3	2	2	1	4
19	1	Female	2	Single	1	College/University or Above	4	Student	4	PHP 10,000 or less	1	Urban	2	NCR	No	2	2	1	2	4	2	2	1	2	1	2	1	2	1	1	3	Agree	3	2	3	2	3	4	2	4	2	3	2	3	3	2	2	1	4
61	5	Female	2	Single	1	College/University or Above	4	Self-employed	3	PHP 20,000 to 100,000	3	Urban	2	NCR	No	2	2	1	2	5	3	2	1	1	1	2	1	2	1	4	1	Disagree	2	1	2	1	4	2	1	2	1	4	2	4	3	2	3	2	4
74	5	Female	2	Married	2	College/University or Above	4	Housewife/Retired/Unemployed/Other	5	PHP 20,000 to 100,000	3	Urban	2	Region VI	No	2	2	2	1	4	2	5	2	2	1	3	2	4	2	4	3	Disagree	2	1	2	1	2	3	2	2	1	3	2	2	4	2	4	2	3
53	4	Male	1	Married	2	College/University or Above	4	Professional/White Collar Worker	2	PHP 20,000 to 100,000	3	Urban	2	NCR	Yes	1	1	1	2	4	2	3	1	1	1	2	1	3	2	1	1	Disagree	2	1	3	2	4	3	2	2	1	3	2	4	3	2	3	2	4
42	3	Male	1	Single	1	College/University or Above	4	Housewife/Retired/Unemployed/Other	5	PHP 10,000 or less	1	Urban	2	NCR	No	2	2	1	2	4	2	5	2	1	1	3	2	3	2	4	1	Disagree	2	1	3	2	3	4	2	2	1	4	2	4	3	2	3	2	4
20	1	Female	2	Single	1	College/University or Above	4	Student	4	PHP 20,000 to 100,000	3	Urban	2	NCR	Yes	1	2	1	2	4	2	4	2	2	1	2	1	4	2	4	2	Disagree	2	1	3	2	4	4	2	2	1	4	2	4	4	2	4	2	3
62	5	Male	1	Single	1	College/University or Above	4	Housewife/Retired/Unemployed/Other	5	PHP 20,000 to 100,000	3	Urban	2	NCR	Yes	1	2	1	2	4	2	4	2	2	1	2	1	2	1	1	1	Disagree	2	1	3	2	3	3	2	2	1	3	2	3	3	2	3	2	3
55	4	Female	2	Single	1	College/University or Above	4	Professional/White Collar Worker	2	PHP 10,000 to 20,000	2	Rural	1	Region VII	No	2	2	1	2	5	3	4	2	1	1	1	1	3	2	1	1	Strongly Disagree	1	1	3	2	3	4	2	2	1	3	2	3	3	2	3	2	4
27	1	Male	1	Single	1	College/University or Above	4	Professional/White Collar Worker	2	PHP 20,000 to 100,000	3	Urban	2	NCR	No	2	2	1	2	5	3	5	2	1	1	3	2	3	2	4	5	Disagree	2	1	4	2	4	3	2	2	1	3	2	4	4	2	4	2	3
30	1	Male	1	Single	1	College/University or Above	4	Professional/White Collar Worker	2	PHP 20,000 to 100,000	3	Rural	1	NCR	No	2	2	2	2	5	3	5	2	4	2	4	2	4	2	1	1	Strongly Disagree	1	1	3	2	3	4	2	1	1	4	2	4	4	2	4	2	3
20	1	Female	2	Single	1	College/University or Above	4	Student	4	PHP 10,000 or less	1	Urban	2	NCR	No	2	2	1	2	5	3	3	1	3	2	2	1	3	2	1	2	Agree	3	2	3	2	4	3	2	1	1	3	2	4	3	2	3	2	3
28	1	Male	1	Single	1	College/University or Above	4	Professional/White Collar Worker	2	PHP 20,000 to 100,000	3	Urban	2	Region III	No	2	2	2	2	5	3	3	1	2	1	3	2	3	2	1	3	Agree	3	2	3	2	3	3	2	2	1	3	2	1	3	2	3	2	3
19	1	Male	1	Single	1	College/University or Above	4	Student	4	PHP 10,000 or less	1	Urban	2	NCR	No	2	2	2	1	3	1	4	2	1	1	3	2	3	2	1	4	Disagree	2	1	2	1	4	4	2	3	2	3	2	3	4	2	3	2	3
57	4	Female	2	Married	2	College/University or Above	4	Housewife/Retired/Unemployed/Other	5	PHP 20,000 to 100,000	3	Urban	2	NCR	No	2	2	1	1	4	2	3	1	3	2	3	2	3	2	1	1	Strongly Disagree	1	1	2	1	2	3	2	3	2	4	2	4	4	2	4	2	4
62	5	Female	2	Married	2	College/University or Above	4	Self-employed	3	PHP 10,000 to 20,000	2	Urban	2	NCR	Yes	1	2	1	2	4	2	4	2	2	1	2	1	4	2	4	1	Strongly Disagree	1	1	1	1	1	4	2	4	2	4	2	1	3	2	3	2	3
44	3	Male	1	Single	1	College/University or Above	4	Self-employed	3	PHP 10,000 to 20,000	2	Urban	2	NCR	No	2	2	1	2	5	3	5	2	3	2	3	2	3	2	1	1	Disagree	2	1	2	1	2	3	2	3	2	3	2	3	3	2	3	2	3
51	4	Male	1	Married	2	College/University or Above	4	Professional/White Collar Worker	2	PHP 20,000 to 100,000	3	Urban	2	NCR	No	2	2	2	2	5	3	4	2	2	1	2	1	3	2	4	3	Agree	3	2	2	1	3	4	2	3	2	3	2	3	3	2	3	2	4
29	1	Male	1	Single	1	College/University or Above	4	Professional/White Collar Worker	2	PHP 10,000 or less	1	Urban	2	Region VII	No	2	2	1	2	3	1	4	2	1	1	1	1	3	2	4	3	Disagree	2	1	3	2	4	4	2	4	2	4	2	4	4	2	4	2	4
47	3	Female	2	Married	2	College/University or Above	4	Professional/White Collar Worker	2	PHP 20,000 to 100,000	3	Urban	2	NCR	No	2	1	1	1	4	2	5	2	1	1	1	1	4	2	4	2	Disagree	2	1	3	2	4	4	2	3	2	3	2	4	3	2	3	2	3
77	5	Male	1	Married	2	College/University or Above	4	Housewife/Retired/Unemployed/Other	5	PHP 20,000 to 100,000	3	Urban	2	NCR	No	2	2	1	1	4	2	5	2	1	1	2	1	3	2	4	2	Disagree	2	1	3	2	3	4	2	3	2	3	2	3	4	2	4	2	3
34	2	Male	1	Married	2	College/University or Above	4	Professional/White Collar Worker	2	PHP 10,000 to 20,000	2	Rural	1	Region VII	No	2	2	1	2	4	2	3	1	2	1	2	1	3	2	1	2	Disagree	2	1	3	2	3	3	2	3	2	3	2	3	3	2	3	2	3
47	3	Female	2	Single	1	College/University or Above	4	Professional/White Collar Worker	2	PHP 20,000 to 100,000	3	Rural	1	Region II	No	2	2	1	2	4	2	4	2	2	1	2	1	3	2	4	2	Disagree	2	1	4	2	3	4	2	3	2	4	2	4	4	2	4	2	4
20	1	Male	1	Single	1	College/University or Above	4	Student	4	PHP 10,000 or less	1	Urban	2	NCR	Yes	1	2	1	2	4	2	4	2	1	1	3	2	3	2	4	4	Disagree	2	1	3	2	4	4	2	3	2	3	2	4	4	2	4	2	3
21	1	Female	2	Single	1	College/University or Above	4	Student	4	PHP 10,000 or less	1	Urban	2	NCR	No	2	2	1	2	4	2	5	2	2	1	2	1	4	2	4	5	Disagree	2	1	4	2	4	4	2	4	2	4	2	4	4	2	4	2	4
40	2	Male	1	Single	1	College/University or Above	4	Professional/White Collar Worker	2	PHP 10,000 to 20,000	2	Urban	2	Region VI	No	2	2	1	2	4	2	5	2	2	1	2	1	4	2	4	1	Disagree	2	1	3	2	3	3	2	3	2	3	2	3	3	2	3	2	3
56	4	Male	1	Single	1	College/University or Above	4	Professional/White Collar Worker	2	PHP 20,000 to 100,000	3	Urban	2	Region III	No	2	2	1	2	4	2	5	2	3	2	3	2	3	2	1	3	Disagree	2	1	3	2	4	4	2	3	2	4	2	4	3	2	3	2	3
39	2	Female	2	Married	2	College/University or Above	4	Professional/White Collar Worker	2	PHP 20,000 to 100,000	3	Urban	2	Region IV-A	No	2	2	1	2	4	2	4	2	2	1	2	1	3	2	4	1	Disagree	2	1	3	2	3	4	2	3	2	4	2	4	3	2	3	2	3
50	3	Male	1	Married	2	College/University or Above	4	Professional/White Collar Worker	2	PHP 100,000 or more	4	Urban	2	Region VI	No	2	2	1	2	4	2	4	2	2	1	3	2	3	2	4	1	Disagree	2	1	3	2	3	4	2	3	2	4	2	4	3	2	3	2	3
19	1	Female	2	Single	1	College/University or Above	4	Student	4	PHP 20,000 to 100,000	3	Rural	1	Region IV-A	No	2	2	2	2	4	2	4	2	2	1	3	2	3	2	4	3	Disagree	2	1	4	2	4	4	2	3	2	4	2	4	3	2	3	2	4
19	1	Female	2	Single	1	College/University or Above	4	Student	4	PHP 20,000 to 100,000	3	Rural	1	NCR	No	2	2	2	2	4	2	4	2	1	1	3	2	3	2	1	3	Disagree	2	1	4	2	4	4	2	3	2	4	2	4	3	2	3	2	3
20	1	Male	1	Single	1	College/University or Above	4	Student	4	PHP 10,000 or less	1	Urban	2	NCR	No	2	2	2	2	4	2	4	2	1	1	3	2	3	2	4	2	Strongly Disagree	1	1	3	2	3	4	2	3	2	3	2	3	3	2	3	2	3
45	3	Female	2	Single	1	College/University or Above	4	Professional/White Collar Worker	2	PHP 10,000 to 20,000	2	Urban	2	NCR	No	2	2	2	2	4	2	4	2	2	1	2	1	3	2	4	3	Disagree	2	1	3	2	3	3	2	3	2	4	2	4	3	2	3	2	3
36	2	Female	2	Married	2	College/University or Above	4	Professional/White Collar Worker	2	PHP 20,000 to 100,000	3	Urban	2	NCR	No	2	2	2	2	4	2	3	1	2	1	2	1	2	1	1	3	Strongly Disagree	1	1	4	2	4	3	2	3	2	3	2	4	3	2	3	2	4
65	5	Male	1	Single	1	College/University or Above	4	Housewife/Retired/Unemployed/Other	5	PHP 10,000 to 20,000	2	Urban	2	NCR	Yes	1	2	1	1	5	3	4	2	3	2	3	2	3	2	1	2	Disagree	2	1	4	2	4	4	2	4	2	4	2	4	3	2	3	2	3
28	1	Female	2	Single	1	College/University or Above	4	Professional/White Collar Worker	2	PHP 20,000 to 100,000	3	Urban	2	Region IV-A	Yes	1	2	1	1	5	3	3	1	2	1	3	2	3	2	1	3	Disagree	2	1	4	2	3	4	2	3	2	3	2	4	3	2	3	2	4
20	1	Male	1	Single	1	College/University or Above	4	Student	4	PHP 10,000 or less	1	Rural	1	Region III	No	2	2	1	2	5	3	4	2	1	1	1	1	3	2	4	1	Disagree	2	1	3	2	3	3	2	3	2	3	2	3	3	2	3	2	3
20	1	Female	2	Single	1	College/University or Above	4	Student	4	PHP 10,000 or less	1	Urban	2	NCR	Yes	1	2	1	2	5	3	5	2	1	1	1	1	3	2	4	4	Disagree	2	1	4	2	4	4	2	3	2	4	2	4	4	2	4	2	3
73	5	Male	1	Married	2	College/University or Above	4	Housewife/Retired/Unemployed/Other	5	PHP 10,000 or less	1	Urban	2	NCR	No	2	2	1	2	5	3	4	2	1	1	2	1	4	2	4	1	Disagree	2	1	4	2	4	4	2	3	2	4	2	4	4	2	4	2	4
58	4	Female	2	Married	2	College/University or Above	4	Self-employed	3	PHP 20,000 to 100,000	3	Urban	2	NCR	No	2	2	1	2	5	3	4	2	1	1	1	1	3	2	4	1	Disagree	2	1	3	2	4	4	2	3	2	4	2	4	3	2	3	2	4
43	3	Female	2	Married	2	College/University or Above	4	Professional/White Collar Worker	2	PHP 20,000 to 100,000	3	Rural	1	Region II	No	2	2	2	2	5	3	5	2	2	1	3	2	4	2	4	1	Strongly Disagree	1	1	3	2	4	4	2	3	2	4	2	4	4	2	4	2	3
50	3	Male	1	Married	2	College/University or Above	4	Professional/White Collar Worker	2	PHP 20,000 to 100,000	3	Urban	2	NCR	Yes	1	2	2	2	5	3	4	2	2	1	3	2	3	2	4	3	Disagree	2	1	3	2	3	3	2	3	2	3	2	3	3	2	3	2	3
57	4	Female	2	Married	2	College/University or Above	4	Professional/White Collar Worker	2	PHP 20,000 to 100,000	3	Urban	2	NCR	Yes	1	2	1	1	3	1	4	2	2	1	2	1	3	2	1	3	Agree	3	2	3	2	4	4	2	3	2	3	2	4	3	2	3	2	3
47	3	Female	2	Single	1	College/University or Above	4	Professional/White Collar Worker	2	PHP 20,000 to 100,000	3	Rural	1	Region III	No	2	2	1	1	4	2	4	2	2	1	3	2	4	2	4	3	Agree	3	2	3	2	3	3	2	3	2	3	2	3	4	2	4	2	3
19	1	Female	2	Single	1	College/University or Above	4	Student	4	PHP 10,000 or less	1	Urban	2	Region III	No	2	2	1	1	4	2	4	2	1	1	3	2	3	2	4	2	Agree	3	2	4	2	4	4	2	3	2	4	2	4	3	2	3	2	3
52	4	Female	2	Single	1	College/University or Above	4	Professional/White Collar Worker	2	PHP 20,000 to 100,000	3	Urban	2	Region VIII	No	2	2	1	1	4	2	5	2	4	2	3	2	4	2	4	2	Strongly Agree	4	2	4	2	4	4	2	4	2	4	2	4	4	2	4	2	3
54	4	Female	2	Married	2	College/University or Above	4	Self-employed	3	PHP 20,000 to 100,000	3	Urban	2	Region XI	No	2	2	1	1	4	2	4	2	2	1	2	1	3	2	4	2	Agree	3	2	4	2	4	4	2	3	2	4	2	4	3	2	3	2	4
20	1	Female	2	Single	1	College/University or Above	4	Student	4	PHP 10,000 or less	1	Urban	2	Region III	No	2	2	1	2	4	2	4	2	1	1	2	1	3	2	1	3	Agree	3	2	3	2	3	3	2	3	2	3	2	3	3	2	3	2	3
21	1	Female	2	Single	1	College/University or Above	4	Student	4	PHP 10,000 or less	1	Urban	2	NCR	No	2	2	1	2	4	2	5	2	2	1	3	2	3	2	4	1	Agree	3	2	4	2	4	4	2	4	2	4	2	4	3	2	3	2	3
47	3	Female	2	Single	1	College/University or Above	4	Professional/White Collar Worker	2	PHP 10,000 to 20,000	2	Urban	2	Region IV-A	No	2	2	1	2	4	2	4	2	2	1	2	1	2	1	1	4	Agree	3	2	3	2	4	4	2	3	2	4	2	4	3	2	3	2	4
25	1	Female	2	Single	1	College/University or Above	4	Professional/White Collar Worker	2	PHP 20,000 to 100,000	3	Urban	2	Region IV-A	No	2	2	1	2	4	2	3	1	1	1	2	1	4	2	4	4	Agree	3	2	4	2	4	4	2	4	2	4	2	4	4	2	4	2	4
54	4	Male	1	Single	1	College/University or Above	4	Professional/White Collar Worker	2	PHP 20,000 to 100,000	3	Urban	2	NCR	Yes	1	2	1	2	4	2	3	1	1	1	2	1	3	2	1	1	Agree	3	2	3	2	4	3	2	3	2	4	2	4	3	2	3	2	4
48	3	Male	1	Married	2	College/University or Above	4	Professional/White Collar Worker	2	PHP 20,000 to 100,000	3	Urban	2	Region VI	No	2	2	1	2	4	2	4	2	2	1	3	2	3	2	1	3	Agree	3	2	3	2	3	4	2	3	2	3	2	3	3	2	3	2	3
48	3	Male	1	Married	2	College/University or Above	4	Professional/White Collar Worker	2	PHP 100,000 or more	4	Urban	2	NCR	No	2	2	1	1	5	3	5	2	3	2	3	2	4	2	4	3	Strongly Agree	4	2	4	2	4	4	2	4	2	4	2	4	4	2	4	2	3
21	1	Female	2	Single	1	College/University or Above	4	Student	4	PHP 10,000 or less	1	Rural	1	NCR	No	2	2	1	2	5	3	5	2	2	1	3	2	4	2	1	3	Agree	3	2	3	2	3	4	2	3	2	3	2	3	3	2	4	2	3
69	5	Female	2	Married	2	College/University or Above	4	Professional/White Collar Worker	2	PHP 100,000 or more	4	Urban	2	Region IV-A	No	2	2	1	2	4	2	4	2	1	1	2	1	4	2	4	3	Disagree	2	1	2	1	3	3	2	2	1	3	2	3	3	2	3	2	4
50	3	Female	2	Married	2	College/University or Above	4	Professional/White Collar Worker	2	PHP 20,000 to 100,000	3	Rural	1	Region II	No	2	2	1	2	4	2	4	2	2	1	2	1	3	2	1	3	Disagree	2	1	3	2	2	3	2	3	2	3	2	3	3	2	3	2	3
61	5	Female	2	Single	1	College/University or Above	4	Professional/White Collar Worker	2	PHP 20,000 to 100,000	3	Urban	2	NCR	No	2	2	1	1	3	1	4	2	2	1	3	2	3	2	4	4	Disagree	2	1	2	1	2	3	2	2	1	3	2	3	3	2	3	2	2
46	3	Female	2	Married	2	College/University or Above	4	Professional/White Collar Worker	2	PHP 20,000 to 100,000	3	Urban	2	NCR	Yes	1	2	1	2	4	2	4	2	2	1	2	1	3	2	4	3	Disagree	2	1	3	2	3	4	2	1	1	3	2	3	3	2	3	2	4
21	1	Female	2	Single	1	College/University or Above	4	Student	4	PHP 100,000 or more	4	Urban	2	Region IV-A	No	2	2	1	2	5	3	3	1	1	1	3	2	3	2	4	2	Disagree	2	1	4	2	4	4	2	2	1	4	2	4	4	2	4	2	4
51	4	Male	1	Single	1	College/University or Above	4	Professional/White Collar Worker	2	PHP 100,000 or more	4	Urban	2	NCR	No	2	2	1	2	3	1	4	2	1	1	1	1	4	2	4	5	Agree	3	2	3	2	3	4	2	2	1	3	2	3	3	2	3	2	3
20	1	Female	2	Single	1	College/University or Above	4	Student	4	PHP 10,000 or less	1	Rural	1	Region IV-B	No	2	2	2	2	4	2	4	2	3	2	3	2	3	2	1	4	Strongly Disagree	1	1	3	2	4	4	2	3	2	4	2	4	4	2	4	2	3
49	3	Male	1	Married	2	College/University or Above	4	Professional/White Collar Worker	2	PHP 100,000 or more	4	Urban	2	Region X	No	2	2	1	1	4	2	5	2	2	1	2	1	3	2	4	3	Agree	3	2	4	2	4	3	2	3	2	4	2	4	4	2	4	2	3
38	2	Female	2	Single	1	College/University or Above	4	Self-employed	3	PHP 10,000 or less	1	Rural	1	Region VII	No	2	2	2	2	5	3	3	1	2	1	2	1	2	1	1	3	Strongly Disagree	1	1	1	1	1	2	1	1	1	2	1	1	2	1	2	1	3
65	5	Female	2	Married	2	College/University or Above	4	Professional/White Collar Worker	2	PHP 100,000 or more	4	Urban	2	Region XII	No	2	2	1	2	5	3	1	1	1	1	1	1	1	1	4	1	Agree	3	2	2	1	3	2	1	2	1	2	1	3	2	1	2	1	4
43	3	Female	2	Married	2	College/University or Above	4	Self-employed	3	PHP 100,000 or more	4	Urban	2	Region VII	No	2	2	1	2	5	3	3	1	3	2	3	2	2	1	1	1	Disagree	2	1	2	1	2	3	2	2	1	3	2	3	2	1	2	1	4
67	5	Female	2	Married	2	College/University or Above	4	Self-employed	3	PHP 100,000 or more	4	Urban	2	NCR	No	2	2	1	2	5	3	3	1	2	1	3	2	3	2	1	2	Disagree	2	1	2	1	2	3	2	2	1	3	2	3	2	1	2	1	4
28	1	Female	2	Married	2	College/University or Above	4	Blue Collar Worker	1	PHP 20,000 to 100,000	3	Urban	2	NCR	No	2	2	1	2	4	2	3	1	2	1	2	1	2	1	1	2	Disagree	2	1	3	2	3	3	2	2	1	3	2	3	2	1	2	1	3
54	4	Female	2	Married	2	College/University or Above	4	Professional/White Collar Worker	2	PHP 20,000 to 100,000	3	Rural	1	Region VIII	No	2	2	1	2	4	2	2	1	1	1	2	1	3	2	4	1	Agree	3	2	3	2	3	3	2	2	1	3	2	3	2	1	2	1	3
57	4	Female	2	Married	2	College/University or Above	4	Professional/White Collar Worker	2	PHP 20,000 to 100,000	3	Urban	2	NCR	Yes	1	2	1	2	4	2	3	1	1	1	2	1	3	2	4	1	Agree	3	2	3	2	3	3	2	2	1	3	2	3	2	1	2	1	4
43	3	Female	2	Married	2	College/University or Above	4	Professional/White Collar Worker	2	PHP 20,000 to 100,000	3	Urban	2	NCR	No	2	2	1	2	4	2	2	1	2	1	2	1	2	1	1	1	Disagree	2	1	3	2	4	4	2	3	2	3	2	4	2	1	2	1	4
75	5	Female	2	Married	2	College/University or Above	4	Housewife/Retired/Unemployed/Other	5	PHP 20,000 to 100,000	3	Urban	2	NCR	No	2	2	1	2	5	3	3	1	3	2	3	2	3	2	1	1	Disagree	2	1	3	2	3	4	2	4	2	4	2	3	2	1	2	1	3
69	5	Female	2	Single	1	College/University or Above	4	Professional/White Collar Worker	2	PHP 20,000 to 100,000	3	Urban	2	NCR	No	2	2	1	1	4	2	4	2	1	1	2	1	4	2	4	2	Strongly Agree	4	2	4	2	4	4	2	4	2	4	2	4	2	1	2	1	4
39	2	Female	2	Married	2	College/University or Above	4	Professional/White Collar Worker	2	PHP 20,000 to 100,000	3	Rural	1	Region VI	No	2	2	1	2	4	2	2	1	2	1	2	1	2	1	1	1	Agree	3	2	3	2	3	4	2	3	2	3	2	3	2	1	2	1	4
56	4	Female	2	Married	2	College/University or Above	4	Self-employed	3	PHP 20,000 to 100,000	3	Urban	2	NCR	No	2	2	1	2	4	2	3	1	1	1	2	1	2	1	4	1	Agree	3	2	3	2	3	3	2	3	2	2	1	3	3	2	2	1	4
35	2	Female	2	Single	1	College/University or Above	4	Blue Collar Worker	1	PHP 10,000 to 20,000	2	Urban	2	Region VII	No	2	2	2	2	5	3	3	1	2	1	2	1	3	2	4	1	Disagree	2	1	2	1	2	3	2	2	1	3	2	3	3	2	2	1	3
34	2	Male	1	Married	2	College/University or Above	4	Professional/White Collar Worker	2	PHP 20,000 to 100,000	3	Urban	2	Region VII	No	2	2	1	2	4	2	4	2	2	1	3	2	3	2	1	4	Disagree	2	1	3	2	3	2	1	2	1	3	2	3	2	1	3	2	3
19	1	Female	2	Single	1	College/University or Above	4	Student	4	PHP 20,000 to 100,000	3	Urban	2	NCR	No	2	2	1	2	3	1	3	1	2	1	2	1	2	1	1	1	Disagree	2	1	3	2	3	3	2	3	2	3	2	3	2	1	3	2	4
51	4	Female	2	Married	2	College/University or Above	4	Housewife/Retired/Unemployed/Other	5	PHP 20,000 to 100,000	3	Rural	1	Region III	No	2	2	1	2	3	1	3	1	2	1	3	2	3	2	1	3	Strongly Disagree	1	1	1	1	1	3	2	2	1	4	2	4	3	2	3	2	4
46	3	Male	1	Single	1	College/University or Above	4	Professional/White Collar Worker	2	PHP 20,000 to 100,000	3	Rural	1	Region VI	No	2	2	1	1	4	2	4	2	1	1	2	1	4	2	4	1	Strongly Disagree	1	1	2	1	2	4	2	2	1	3	2	3	3	2	3	2	4
42	3	Female	2	Single	1	College/University or Above	4	Professional/White Collar Worker	2	PHP 100,000 or more	4	Rural	1	Region IV-A	No	2	2	1	2	3	1	3	1	1	1	1	1	3	2	4	3	Disagree	2	1	3	2	4	4	2	2	1	3	2	4	3	2	3	2	3
55	4	Female	2	Married	2	College/University or Above	4	Professional/White Collar Worker	2	PHP 20,000 to 100,000	3	Urban	2	NCR	No	2	2	1	2	4	2	3	1	1	1	3	2	4	2	4	1	Strongly Disagree	1	1	3	2	3	4	2	1	1	4	2	3	3	2	3	2	4
61	5	Female	2	Married	2	College/University or Above	4	Professional/White Collar Worker	2	PHP 20,000 to 100,000	3	Rural	1	Region IV-A	No	2	2	1	1	5	3	4	2	2	1	3	2	3	2	4	1	Disagree	2	1	3	2	3	4	2	2	1	4	2	4	3	2	3	2	4
47	3	Female	2	Single	1	College/University or Above	4	Professional/White Collar Worker	2	PHP 20,000 to 100,000	3	Urban	2	NCR	Yes	1	2	1	1	4	2	4	2	2	1	2	1	3	2	4	1	Disagree	2	1	4	2	4	4	2	3	2	4	2	4	3	2	3	2	3
21	1	Male	1	Single	1	College/University or Above	4	Student	4	PHP 10,000 or less	1	Urban	2	Region IV-A	No	2	2	1	2	4	2	2	1	1	1	2	1	2	1	4	1	Disagree	2	1	4	2	4	4	2	4	2	4	2	4	3	2	3	2	4
35	2	Female	2	Married	2	College/University or Above	4	Self-employed	3	PHP 20,000 to 100,000	3	Urban	2	NCR	No	2	2	1	2	4	2	2	1	1	1	1	1	2	1	1	1	Strongly Disagree	1	1	3	2	3	3	2	3	2	3	2	3	3	2	3	2	4
45	3	Female	2	Married	2	College/University or Above	4	Housewife/Retired/Unemployed/Other	5	PHP 20,000 to 100,000	3	Urban	2	NCR	No	2	2	1	2	4	2	2	1	1	1	1	1	3	2	4	1	Disagree	2	1	3	2	3	4	2	4	2	4	2	4	3	2	3	2	4
62	5	Female	2	Single	1	College/University or Above	4	Housewife/Retired/Unemployed/Other	5	PHP 100,000 or more	4	Urban	2	NCR	No	2	2	2	2	4	2	4	2	1	1	2	1	4	2	4	4	Disagree	2	1	4	2	4	4	2	4	2	4	2	4	3	2	3	2	3
73	5	Female	2	Married	2	College/University or Above	4	Housewife/Retired/Unemployed/Other	5	PHP 100,000 or more	4	Urban	2	NCR	Yes	1	2	1	1	5	3	5	2	3	2	2	1	3	2	1	4	Disagree	2	1	3	2	4	4	2	3	2	4	2	4	4	2	3	2	3
41	3	Female	2	Married	2	College/University or Above	4	Professional/White Collar Worker	2	PHP 20,000 to 100,000	3	Rural	1	Region X	No	2	2	1	2	5	3	4	2	3	2	2	1	3	2	4	3	Disagree	2	1	3	2	4	4	2	3	2	4	2	4	4	2	4	2	4
20	1	Female	2	Single	1	College/University or Above	4	Student	4	PHP 10,000 to 20,000	2	Urban	2	Region III	No	2	2	2	2	5	3	3	1	2	1	3	2	4	2	4	1	Strongly Disagree	1	1	4	2	4	4	2	3	2	4	2	4	3	2	3	2	3
55	4	Female	2	Single	1	College/University or Above	4	Housewife/Retired/Unemployed/Other	5	PHP 20,000 to 100,000	3	Urban	2	Region X	No	2	2	1	1	3	1	4	2	1	1	1	1	3	2	4	4	Agree	3	2	4	2	4	4	2	3	2	4	2	4	3	2	3	2	4
75	5	Male	1	Married	2	College/University or Above	4	Professional/White Collar Worker	2	PHP 20,000 to 100,000	3	Urban	2	Region VI	No	2	2	1	1	4	2	3	1	2	1	2	1	3	2	1	1	Agree	3	2	3	2	3	4	2	4	2	4	2	4	3	2	3	2	4
60	4	Female	2	Married	2	College/University or Above	4	Housewife/Retired/Unemployed/Other	5	PHP 20,000 to 100,000	3	Urban	2	NCR	Yes	1	2	1	1	4	2	5	2	2	1	2	1	3	2	4	1	Agree	3	2	3	2	3	4	2	4	2	4	2	4	3	2	3	2	3
67	5	Male	1	Married	2	College/University or Above	4	Housewife/Retired/Unemployed/Other	5	PHP 20,000 to 100,000	3	Urban	2	NCR	No	2	2	1	1	4	2	5	2	2	1	2	1	3	2	4	3	Agree	3	2	4	2	4	4	2	3	2	4	2	4	3	2	3	2	3
44	3	Male	1	Married	2	College/University or Above	4	Professional/White Collar Worker	2	PHP 100,000 or more	4	Urban	2	NCR	No	2	2	1	1	4	2	4	2	2	1	2	1	3	2	4	2	Agree	3	2	4	2	4	4	2	3	2	4	2	4	3	2	3	2	3
49	3	Female	2	Married	2	College/University or Above	4	Professional/White Collar Worker	2	PHP 20,000 to 100,000	3	Urban	2	NCR	No	2	2	1	2	4	2	3	1	1	1	3	2	4	2	1	1	Agree	3	2	3	2	3	4	2	4	2	4	2	4	4	2	4	2	4
52	4	Female	2	Married	2	College/University or Above	4	Housewife/Retired/Unemployed/Other	5	PHP 10,000 to 20,000	2	Urban	2	NCR	Yes	1	2	2	2	4	2	3	1	2	1	2	1	3	2	1	3	Agree	3	2	3	2	3	4	2	3	2	4	2	4	3	2	3	2	4
53	4	Female	2	Married	2	College/University or Above	4	Professional/White Collar Worker	2	PHP 20,000 to 100,000	3	Urban	2	NCR	Yes	1	2	1	2	5	3	5	2	2	1	3	2	3	2	1	3	Agree	3	2	4	2	4	4	2	3	2	4	2	4	3	2	3	2	4
43	3	Female	2	Married	2	College/University or Above	4	Professional/White Collar Worker	2	PHP 20,000 to 100,000	3	Urban	2	NCR	No	2	2	1	1	3	1	3	1	1	1	1	1	1	1	1	1	Strongly Disagree	1	1	1	1	2	1	1	2	1	4	2	3	2	1	2	1	2
55	4	Male	1	Single	1	College/University or Above	4	Professional/White Collar Worker	2	PHP 10,000 to 20,000	2	Urban	2	Region II	No	2	2	2	1	4	2	5	2	1	1	1	1	4	2	4	1	Strongly Agree	4	2	4	2	4	4	2	2	1	4	2	4	3	2	3	2	3
75	5	Male	1	Married	2	College/University or Above	4	Housewife/Retired/Unemployed/Other	5	PHP 20,000 to 100,000	3	Rural	1	Region III	No	2	2	1	2	4	2	3	1	2	1	2	1	3	2	4	3	Disagree	2	1	2	1	3	3	2	3	2	3	2	3	3	2	3	2	3
21	1	Male	1	Single	1	College/University or Above	4	Student	4	PHP 10,000 or less	1	Rural	1	NCR	No	2	2	1	2	4	2	4	2	1	1	1	1	3	2	4	1	Strongly Disagree	1	1	3	2	2	4	2	3	2	3	2	4	3	2	3	2	4
20	1	Female	2	Single	1	College/University or Above	4	Student	4	PHP 20,000 to 100,000	3	Rural	1	Region I	No	2	2	1	2	4	2	4	2	2	1	2	1	4	2	4	2	Disagree	2	1	4	2	4	4	2	3	2	4	2	3	4	2	4	2	4
57	4	Female	2	Married	2	College/University or Above	4	Self-employed	3	PHP 10,000 to 20,000	2	Urban	2	NCR	Yes	1	2	1	2	4	2	4	2	2	1	3	2	3	2	4	3	Disagree	2	1	3	2	3	3	2	3	2	4	2	4	3	2	3	2	3
56	4	Female	2	Married	2	College/University or Above	4	Professional/White Collar Worker	2	PHP 100,000 or more	4	Urban	2	Region III	No	2	2	2	1	3	1	3	1	2	1	2	1	2	1	1	3	Agree	3	2	4	2	4	3	2	3	2	4	2	4	3	2	3	2	4
57	4	Female	2	Married	2	College/University or Above	4	Housewife/Retired/Unemployed/Other	5	PHP 20,000 to 100,000	3	Urban	2	NCR	No	2	2	1	2	4	2	3	1	2	1	2	1	3	2	4	3	Agree	3	2	4	2	4	4	2	3	2	4	2	4	3	2	3	2	4
21	1	Female	2	Single	1	College/University or Above	4	Student	4	PHP 10,000 or less	1	Rural	1	Region III	No	2	2	2	2	5	3	3	1	2	1	3	2	3	2	4	1	Strongly Disagree	1	1	3	2	3	3	2	3	2	3	2	3	2	1	2	1	3
62	5	Male	1	Married	2	College/University or Above	4	Self-employed	3	PHP 20,000 to 100,000	3	Rural	1	Region VII	No	2	2	2	1	4	2	4	2	4	2	3	2	1	1	2	2	Disagree	2	1	4	2	4	4	2	2	1	3	2	2	3	2	3	2	3
34	2	Male	1	Married	2	College/University or Above	4	Housewife/Retired/Unemployed/Other	5	PHP 20,000 to 100,000	3	Urban	2	NCR	No	2	2	2	2	4	2	4	2	3	2	3	2	3	2	1	1	Disagree	2	1	3	2	4	3	2	4	2	3	2	4	4	2	4	2	3
21	1	Female	2	Single	1	College/University or Above	4	Professional/White Collar Worker	2	PHP 10,000 or less	1	Rural	1	Region VI	No	2	2	2	2	5	3	4	2	3	2	3	2	3	2	1	2	Strongly Disagree	1	1	4	2	4	4	2	3	2	4	2	4	3	2	3	2	3
20	1	Female	2	Single	1	College/University or Above	4	Student	4	PHP 100,000 or more	4	Urban	2	NCR	Yes	1	2	2	2	3	1	4	2	2	1	3	2	3	2	4	4	Disagree	2	1	2	1	2	3	2	3	2	3	2	2	3	2	3	2	2
60	4	Female	2	Single	1	College/University or Above	4	Professional/White Collar Worker	2	PHP 100,000 or more	4	Urban	2	NCR	No	2	2	1	2	5	3	1	1	2	1	2	1	3	2	4	1	Disagree	2	1	2	1	2	3	2	2	1	3	2	3	2	1	2	1	3
54	4	Female	2	Married	2	College/University or Above	4	Self-employed	3	PHP 100,000 or more	4	Rural	1	Region IV-A	No	2	2	1	2	4	2	3	1	1	1	3	2	3	2	4	1	Agree	3	2	3	2	3	3	2	3	2	3	2	3	2	1	2	1	3
55	4	Female	2	Married	2	College/University or Above	4	Professional/White Collar Worker	2	PHP 100,000 or more	4	Urban	2	Region IV-A	No	2	2	1	2	5	3	4	2	2	1	2	1	4	2	4	1	Strongly Disagree	1	1	1	1	1	3	2	3	2	1	1	3	3	2	2	1	3
56	4	Female	2	Married	2	College/University or Above	4	Housewife/Retired/Unemployed/Other	5	PHP 10,000 to 20,000	2	Urban	2	Region III	No	2	2	1	2	5	3	3	1	1	1	1	1	3	2	4	1	Strongly Agree	4	2	4	2	4	4	2	3	2	4	2	4	3	2	2	1	4
19	1	Female	2	Single	1	College/University or Above	4	Student	4	PHP 100,000 or more	4	Urban	2	Region IV-A	No	2	2	1	2	5	3	4	2	1	1	1	1	3	2	4	3	Strongly Disagree	1	1	4	2	4	4	2	3	2	2	1	4	3	2	3	2	4
19	1	Male	1	Single	1	College/University or Above	4	Student	4	PHP 10,000 or less	1	Rural	1	Region IV-A	No	2	1	1	2	4	2	3	1	1	1	3	2	3	2	4	1	Disagree	2	1	3	2	3	3	2	2	1	4	2	4	3	2	3	2	3
67	5	Male	1	Married	2	College/University or Above	4	Professional/White Collar Worker	2	PHP 100,000 or more	4	Urban	2	NCR	Yes	1	2	1	2	5	3	5	2	2	1	2	1	3	2	4	3	Disagree	2	1	3	2	3	3	2	2	1	3	2	3	3	2	3	2	3
56	4	Female	2	Married	2	College/University or Above	4	Self-employed	3	PHP 20,000 to 100,000	3	Rural	1	Region IV-A	No	2	2	1	2	4	2	4	2	2	1	2	1	3	2	4	3	Agree	3	2	3	2	4	3	2	2	1	4	2	4	3	2	3	2	3
30	1	Female	2	Single	1	College/University or Above	4	Professional/White Collar Worker	2	PHP 20,000 to 100,000	3	Urban	2	NCR	No	2	2	1	2	5	3	4	2	1	1	2	1	3	2	4	3	Disagree	2	1	4	2	4	4	2	4	2	4	2	4	3	2	3	2	3
37	2	Female	2	Married	2	College/University or Above	4	Professional/White Collar Worker	2	PHP 20,000 to 100,000	3	Rural	1	Region II	No	2	2	2	2	5	3	4	2	2	1	2	1	3	2	4	1	Strongly Disagree	1	1	3	2	4	4	2	4	2	3	2	4	3	2	4	2	3
55	4	Male	1	Married	2	College/University or Above	4	Professional/White Collar Worker	2	PHP 20,000 to 100,000	3	Urban	2	Region III	No	2	2	1	1	4	2	3	1	2	1	2	1	2	1	1	1	Disagree	2	1	2	1	3	2	1	2	1	2	1	3	2	1	2	1	2
23	1	Female	2	Single	1	College/University or Above	4	Professional/White Collar Worker	2	PHP 10,000 or less	1	Rural	1	Region VII	No	2	2	2	2	5	3	3	1	2	1	2	1	2	1	1	3	Strongly Disagree	1	1	1	1	1	2	1	2	1	3	2	4	3	2	2	1	2
70	5	Female	2	Married	2	College/University or Above	4	Housewife/Retired/Unemployed/Other	5	PHP 10,000 to 20,000	2	Urban	2	Region VII	No	2	2	2	2	5	3	5	2	2	1	1	1	3	2	1	1	Strongly Disagree	1	1	1	1	1	4	2	2	1	4	2	1	3	2	4	2	1
42	3	Male	1	Married	2	College/University or Above	4	Professional/White Collar Worker	2	PHP 20,000 to 100,000	3	Urban	2	NCR	Yes	1	2	1	2	5	3	5	2	1	1	1	1	3	2	4	2	Strongly Disagree	1	1	3	2	3	3	2	3	2	3	2	3	4	2	4	2	2
66	5	Female	2	Married	2	College/University or Above	4	Housewife/Retired/Unemployed/Other	5	PHP 20,000 to 100,000	3	Urban	2	NCR	Yes	1	2	1	2	4	2	1	1	1	1	2	1	2	1	1	1	Strongly Disagree	1	1	2	1	2	2	1	2	1	2	1	2	2	1	2	1	4
64	5	Male	1	Married	2	College/University or Above	4	Professional/White Collar Worker	2	PHP 100,000 or more	4	Urban	2	Region VI	No	2	2	1	2	4	2	4	2	1	1	1	1	3	2	4	1	Disagree	2	1	2	1	3	2	1	2	1	2	1	3	2	1	2	1	3
48	3	Female	2	Married	2	College/University or Above	4	Professional/White Collar Worker	2	PHP 20,000 to 100,000	3	Urban	2	Region VII	No	2	2	2	2	4	2	3	1	2	1	2	1	3	2	4	1	Strongly Disagree	1	1	2	1	2	2	1	2	1	2	1	2	2	1	2	1	3
68	5	Female	2	Married	2	College/University or Above	4	Professional/White Collar Worker	2	PHP 20,000 to 100,000	3	Urban	2	NCR	No	2	2	1	2	5	3	2	1	1	1	2	1	3	2	4	2	Disagree	2	1	2	1	3	2	1	2	1	2	1	3	2	1	2	1	3
33	2	Female	2	Single	1	College/University or Above	4	Student	4	PHP 10,000 or less	1	Rural	1	Region III	No	2	2	2	2	5	3	1	1	2	1	2	1	2	1	1	1	Strongly Disagree	1	1	1	1	1	2	1	2	1	1	1	1	2	1	2	1	3
41	3	Female	2	Married	2	College/University or Above	4	Professional/White Collar Worker	2	PHP 10,000 to 20,000	2	Urban	2	Region IV-A	No	2	2	1	2	5	3	2	1	2	1	2	1	2	1	1	1	Disagree	2	1	2	1	2	3	2	2	1	2	1	2	2	1	2	1	4
20	1	Female	2	Single	1	College/University or Above	4	Student	4	PHP 10,000 to 20,000	2	Urban	2	NCR	No	2	2	1	2	5	3	2	1	1	1	3	2	4	2	1	2	Disagree	2	1	2	1	3	3	2	2	1	1	1	4	2	1	2	1	4
49	3	Female	2	Single	1	College/University or Above	4	Professional/White Collar Worker	2	PHP 10,000 to 20,000	2	Urban	2	Region XI	No	2	2	1	2	4	2	3	1	2	1	2	1	3	2	1	6	Agree	3	2	3	2	4	3	2	2	1	2	1	2	2	1	2	1	3
59	4	Female	2	Married	2	College/University or Above	4	Professional/White Collar Worker	2	PHP 20,000 to 100,000	3	Urban	2	NCR	No	2	2	1	1	4	2	3	1	1	1	2	1	3	2	4	2	Disagree	2	1	1	1	1	4	2	2	1	4	2	4	2	1	2	1	4
71	5	Female	2	Single	1	College/University or Above	4	Professional/White Collar Worker	2	PHP 10,000 or less	1	Urban	2	NCR	No	2	2	2	1	4	2	1	1	1	1	2	1	2	1	1	1	Strongly Disagree	1	1	1	1	2	3	2	2	1	3	2	3	2	1	2	1	4
61	5	Female	2	Single	1	College/University or Above	4	Professional/White Collar Worker	2	PHP 10,000 or less	1	Rural	1	Region VII	No	2	2	1	2	4	2	1	1	1	1	1	1	1	1	1	1	Disagree	2	1	2	1	3	3	2	2	1	3	2	3	2	1	2	1	4
29	1	Male	1	Married	2	College/University or Above	4	Self-employed	3	PHP 10,000 to 20,000	2	Urban	2	NCR	Yes	1	2	1	2	4	2	2	1	2	1	2	1	3	2	4	3	Disagree	2	1	2	1	2	3	2	2	1	3	2	3	2	1	2	1	3
39	2	Female	2	Single	1	College/University or Above	4	Professional/White Collar Worker	2	PHP 20,000 to 100,000	3	Urban	2	Region IV-A	No	2	2	1	2	4	2	3	1	2	1	2	1	2	1	1	2	Strongly Disagree	1	1	1	1	2	3	2	2	1	3	2	3	2	1	2	1	4
20	1	Female	2	Single	1	College/University or Above	4	Student	4	PHP 10,000 or less	1	Rural	1	Region III	No	2	2	2	2	4	2	4	2	3	2	4	2	4	2	4	1	Strongly Disagree	1	1	2	1	3	3	2	2	1	3	2	4	2	1	2	1	3
46	3	Female	2	Single	1	College/University or Above	4	Professional/White Collar Worker	2	PHP 20,000 to 100,000	3	Urban	2	Region VI	No	2	2	1	2	5	3	4	2	1	1	3	2	3	2	4	1	Strongly Disagree	1	1	2	1	3	3	2	2	1	3	2	3	2	1	2	1	3
60	4	Female	2	Married	2	College/University or Above	4	Professional/White Collar Worker	2	PHP 100,000 or more	4	Urban	2	NCR	No	2	2	1	2	5	3	1	1	2	1	2	1	2	1	1	1	Strongly Disagree	1	1	1	1	2	4	2	2	1	4	2	4	2	1	2	1	4
42	3	Male	1	Married	2	College/University or Above	4	Professional/White Collar Worker	2	PHP 20,000 to 100,000	3	Urban	2	NCR	Yes	1	2	1	1	4	2	1	1	2	1	1	1	3	2	1	1	Strongly Disagree	1	1	4	2	4	4	2	2	1	4	2	4	2	1	2	1	4
41	3	Female	2	Single	1	College/University or Above	4	Housewife/Retired/Unemployed/Other	5	PHP 20,000 to 100,000	3	Rural	1	Region IV-A	No	2	2	1	2	4	2	3	1	2	1	2	1	2	1	1	2	Strongly Disagree	1	1	3	2	3	4	2	2	1	4	2	4	2	1	2	1	3
23	1	Female	2	Single	1	College/University or Above	4	Student	4	PHP 10,000 or less	1	Urban	2	Region VII	No	2	2	1	2	4	2	3	1	2	1	2	1	2	1	1	3	Disagree	2	1	3	2	3	3	2	2	1	3	2	3	2	1	2	1	4
41	3	Female	2	Married	2	College/University or Above	4	Professional/White Collar Worker	2	PHP 10,000 to 20,000	2	Urban	2	NCR	Yes	1	2	1	2	4	2	3	1	2	1	2	1	2	1	1	1	Disagree	2	1	3	2	3	3	2	2	1	3	2	3	2	1	2	1	4
53	4	Female	2	Single	1	College/University or Above	4	Professional/White Collar Worker	2	PHP 20,000 to 100,000	3	Urban	2	Region IV-A	No	2	2	1	2	4	2	3	1	1	1	2	1	2	1	4	1	Disagree	2	1	3	2	3	3	2	2	1	3	2	3	2	1	2	1	3
70	5	Female	2	Single	1	College/University or Above	4	Housewife/Retired/Unemployed/Other	5	PHP 20,000 to 100,000	3	Urban	2	Region I	Yes	1	2	1	2	4	2	1	1	1	1	2	1	2	1	1	1	Disagree	2	1	3	2	3	3	2	2	1	3	2	3	2	1	2	1	4
63	5	Male	1	Single	1	College/University or Above	4	Professional/White Collar Worker	2	PHP 100,000 or more	4	Urban	2	Region I	No	2	2	1	2	4	2	3	1	1	1	1	1	2	1	1	2	Strongly Disagree	1	1	3	2	4	3	2	2	1	3	2	4	2	1	2	1	4
70	5	Female	2	Married	2	College/University or Above	4	Housewife/Retired/Unemployed/Other	5	PHP 100,000 or more	4	Urban	2	NCR	No	2	2	1	2	4	2	3	1	2	1	2	1	2	1	1	1	Strongly Disagree	1	1	3	2	3	3	2	2	1	3	2	3	2	1	2	1	3
22	1	Female	2	Single	1	College/University or Above	4	Professional/White Collar Worker	2	PHP 10,000 to 20,000	2	Urban	2	Region VII	No	2	2	2	2	4	2	3	1	2	1	2	1	2	1	1	3	Disagree	2	1	3	2	3	3	2	2	1	3	2	3	2	1	2	1	3
23	1	Female	2	Single	1	College/University or Above	4	Professional/White Collar Worker	2	PHP 10,000 to 20,000	2	Urban	2	Region VII	No	2	2	2	2	4	2	3	1	2	1	2	1	2	1	1	3	Disagree	2	1	3	2	3	3	2	2	1	3	2	3	2	1	2	1	3
47	3	Female	2	Single	1	College/University or Above	4	Professional/White Collar Worker	2	PHP 10,000 to 20,000	2	Rural	1	Region VI	No	2	2	1	2	5	3	2	1	1	1	2	1	2	1	4	1	Disagree	2	1	3	2	3	3	2	2	1	3	2	3	2	1	2	1	4
55	4	Female	2	Married	2	College/University or Above	4	Professional/White Collar Worker	2	PHP 10,000 to 20,000	2	Urban	2	Region VI	No	2	2	1	2	5	3	3	1	2	1	2	1	2	1	1	1	Strongly Disagree	1	1	3	2	3	4	2	2	1	3	2	3	2	1	2	1	4
48	3	Female	2	Married	2	College/University or Above	4	Professional/White Collar Worker	2	PHP 20,000 to 100,000	3	Urban	2	Region VI	No	2	2	1	2	5	3	3	1	2	1	3	2	3	2	4	1	Disagree	2	1	3	2	3	3	2	2	1	3	2	3	2	1	2	1	3
34	2	Female	2	Married	2	College/University or Above	4	Professional/White Collar Worker	2	PHP 10,000 to 20,000	2	Urban	2	Region VII	No	2	2	2	2	5	3	3	1	2	1	2	1	2	1	1	1	Disagree	2	1	3	2	3	4	2	2	1	4	2	4	2	1	2	1	3
38	2	Female	2	Married	2	College/University or Above	4	Self-employed	3	PHP 20,000 to 100,000	3	Urban	2	NCR	Yes	1	2	2	2	5	3	2	1	1	1	2	1	3	2	1	1	Disagree	2	1	3	2	3	3	2	2	1	3	2	3	2	1	2	1	4
39	2	Female	2	Married	2	College/University or Above	4	Professional/White Collar Worker	2	PHP 20,000 to 100,000	3	Urban	2	NCR	No	2	2	2	2	3	1	2	1	2	1	2	1	2	1	1	3	Agree	3	2	3	2	4	3	2	2	1	3	2	3	2	1	2	1	4
67	5	Male	1	Married	2	College/University or Above	4	Housewife/Retired/Unemployed/Other	5	PHP 10,000 or less	1	Urban	2	NCR	No	2	2	1	1	2	1	3	1	1	1	2	1	2	1	1	2	Strongly Disagree	1	1	2	1	3	3	2	3	2	3	2	3	2	1	2	1	4
65	5	Female	2	Single	1	College/University or Above	4	Housewife/Retired/Unemployed/Other	5	PHP 100,000 or more	4	Urban	2	NCR	No	2	2	2	2	3	1	3	1	1	1	1	1	3	2	1	1	Strongly Disagree	1	1	1	1	1	4	2	4	2	4	2	1	2	1	2	1	4
54	4	Male	1	Married	2	College/University or Above	4	Self-employed	3	PHP 10,000 to 20,000	2	Urban	2	NCR	Yes	1	2	2	1	4	2	3	1	1	1	2	1	3	2	1	2	Disagree	2	1	2	1	2	3	2	3	2	3	2	3	2	1	2	1	3
55	4	Female	2	Married	2	College/University or Above	4	Professional/White Collar Worker	2	PHP 100,000 or more	4	Urban	2	Region VI	No	2	2	1	2	4	2	3	1	1	1	2	1	2	1	1	3	Disagree	2	1	2	1	3	4	2	3	2	4	2	4	2	1	2	1	4
34	2	Female	2	Married	2	College/University or Above	4	Professional/White Collar Worker	2	PHP 10,000 to 20,000	2	Urban	2	Region VI	No	2	2	1	2	5	3	3	1	2	1	2	1	2	1	1	3	Strongly Disagree	1	1	2	1	2	3	2	3	2	4	2	3	2	1	2	1	4
66	5	Female	2	Married	2	College/University or Above	4	Self-employed	3	PHP 100,000 or more	4	Urban	2	NCR	No	2	2	1	2	5	3	3	1	1	1	2	1	3	2	4	1	Disagree	2	1	2	1	3	4	2	3	2	3	2	4	2	1	2	1	4
68	5	Female	2	Married	2	College/University or Above	4	Housewife/Retired/Unemployed/Other	5	PHP 10,000 or less	1	Urban	2	NCR	No	2	2	1	1	2	1	2	1	1	1	1	1	3	2	1	2	Disagree	2	1	3	2	4	4	2	4	2	4	2	4	2	1	2	1	4
70	5	Female	2	Married	2	College/University or Above	4	Housewife/Retired/Unemployed/Other	5	PHP 10,000 or less	1	Urban	2	NCR	No	2	2	1	1	3	1	3	1	2	1	2	1	2	1	1	1	Disagree	2	1	3	2	3	3	2	3	2	4	2	4	2	1	2	1	3
41	3	Female	2	Married	2	College/University or Above	4	Professional/White Collar Worker	2	PHP 20,000 to 100,000	3	Urban	2	Region IV-A	No	2	2	1	1	3	1	2	1	2	1	2	1	2	1	1	1	Disagree	2	1	4	2	4	4	2	3	2	4	2	4	2	1	2	1	4
55	4	Female	2	Married	2	College/University or Above	4	Professional/White Collar Worker	2	PHP 20,000 to 100,000	3	Urban	2	Region IV-A	No	2	2	1	1	3	1	2	1	1	1	1	1	3	2	4	2	Disagree	2	1	3	2	4	4	2	4	2	4	2	4	2	1	2	1	4
64	5	Female	2	Single	1	College/University or Above	4	Housewife/Retired/Unemployed/Other	5	PHP 10,000 to 20,000	2	Rural	1	Region X	No	2	2	1	2	3	1	2	1	2	1	2	1	3	2	4	2	Disagree	2	1	3	2	3	3	2	3	2	3	2	3	2	1	2	1	3
25	1	Female	2	Single	1	College/University or Above	4	Professional/White Collar Worker	2	PHP 10,000 to 20,000	2	Urban	2	NCR	No	2	2	1	2	3	1	2	1	2	1	2	1	2	1	1	1	Strongly Disagree	1	1	4	2	4	4	2	3	2	4	2	4	2	1	2	1	4
20	1	Female	2	Single	1	College/University or Above	4	Student	4	PHP 20,000 to 100,000	3	Urban	2	NCR	No	2	2	1	2	3	1	3	1	2	1	1	1	2	1	1	2	Disagree	2	1	4	2	4	4	2	3	2	4	2	4	2	1	2	1	4
50	3	Female	2	Married	2	College/University or Above	4	Professional/White Collar Worker	2	PHP 10,000 or less	1	Rural	1	Region VI	No	2	2	2	2	3	1	3	1	2	1	2	1	2	1	1	2	Disagree	2	1	3	2	4	3	2	3	2	4	2	4	2	1	2	1	4
57	4	Female	2	Single	1	College/University or Above	4	Self-employed	3	PHP 10,000 to 20,000	2	Urban	2	Region VIII	No	2	2	1	1	4	2	3	1	1	1	1	1	2	1	1	1	Strongly Disagree	1	1	3	2	3	4	2	4	2	4	2	4	2	1	2	1	4
29	1	Male	1	Single	1	College/University or Above	4	Professional/White Collar Worker	2	PHP 20,000 to 100,000	3	Urban	2	Region VI	No	2	2	1	1	4	2	2	1	2	1	3	2	3	2	4	1	Disagree	2	1	3	2	3	4	2	3	2	4	2	3	2	1	2	1	4
30	1	Female	2	Single	1	College/University or Above	4	Professional/White Collar Worker	2	PHP 20,000 to 100,000	3	Urban	2	NCR	No	2	2	1	1	4	2	3	1	2	1	2	1	2	1	1	3	Disagree	2	1	3	2	4	4	2	3	2	3	2	4	2	1	2	1	4
38	2	Female	2	Married	2	College/University or Above	4	Professional/White Collar Worker	2	PHP 20,000 to 100,000	3	Urban	2	NCR	Yes	1	2	1	1	4	2	3	1	2	1	2	1	3	2	4	1	Disagree	2	1	3	2	4	4	2	4	2	4	2	4	2	1	2	1	4
68	5	Female	2	Married	2	College/University or Above	4	Professional/White Collar Worker	2	PHP 100,000 or more	4	Urban	2	NCR	Yes	1	2	1	1	4	2	3	1	2	1	2	1	3	2	1	1	Strongly Disagree	1	1	4	2	4	4	2	4	2	4	2	4	2	1	2	1	4
62	5	Female	2	Married	2	College/University or Above	4	Housewife/Retired/Unemployed/Other	5	PHP 20,000 to 100,000	3	Urban	2	NCR	No	2	2	2	1	4	2	1	1	1	1	2	1	2	1	1	3	Disagree	2	1	3	2	3	3	2	3	2	4	2	4	2	1	2	1	4
19	1	Female	2	Single	1	College/University or Above	4	Student	4	PHP 10,000 or less	1	Rural	1	Region I	No	2	2	1	2	4	2	3	1	2	1	2	1	2	1	4	3	Strongly Disagree	1	1	4	2	4	4	2	3	2	4	2	4	2	1	2	1	4
36	2	Female	2	Married	2	College/University or Above	4	Professional/White Collar Worker	2	PHP 10,000 to 20,000	2	Rural	1	Region X	No	2	2	1	2	4	2	3	1	2	1	2	1	2	1	1	1	Disagree	2	1	4	2	4	4	2	3	2	4	2	4	2	1	2	1	4
28	1	Female	2	Single	1	College/University or Above	4	Professional/White Collar Worker	2	PHP 20,000 to 100,000	3	Rural	1	Region VI	No	2	2	1	2	4	2	2	1	1	1	1	1	1	1	1	1	Strongly Disagree	1	1	3	2	4	4	2	3	2	4	2	4	2	1	2	1	4
69	5	Female	2	Married	2	College/University or Above	4	Housewife/Retired/Unemployed/Other	5	PHP 10,000 to 20,000	2	Urban	2	NCR	No	2	2	1	2	4	2	3	1	2	1	2	1	3	2	1	1	Strongly Disagree	1	1	4	2	4	4	2	4	2	4	2	4	2	1	2	1	4
33	2	Male	1	Married	2	College/University or Above	4	Professional/White Collar Worker	2	PHP 20,000 to 100,000	3	Urban	2	NCR	No	2	2	1	2	4	2	2	1	1	1	1	1	1	1	1	1	Strongly Disagree	1	1	4	2	4	4	2	3	2	4	2	4	1	1	1	1	4
41	3	Female	2	Married	2	College/University or Above	4	Professional/White Collar Worker	2	PHP 20,000 to 100,000	3	Urban	2	Region VII	No	2	2	1	2	4	2	3	1	2	1	2	1	2	1	1	3	Disagree	2	1	3	2	3	3	2	3	2	3	2	3	2	1	2	1	4
67	5	Female	2	Single	1	College/University or Above	4	Housewife/Retired/Unemployed/Other	5	PHP 20,000 to 100,000	3	Urban	2	NCR	No	2	2	1	2	4	2	3	1	1	1	2	1	3	2	1	2	Disagree	2	1	3	2	3	4	2	3	2	4	2	4	2	1	2	1	4
56	4	Female	2	Married	2	College/University or Above	4	Professional/White Collar Worker	2	PHP 100,000 or more	4	Urban	2	NCR	No	2	2	1	2	4	2	4	2	1	1	1	1	4	2	4	1	Disagree	2	1	3	2	3	3	2	3	2	4	2	4	2	1	2	1	3
67	5	Female	2	Married	2	College/University or Above	4	Professional/White Collar Worker	2	PHP 100,000 or more	4	Urban	2	NCR	Yes	1	2	1	2	4	2	3	1	2	1	2	1	2	1	1	1	Disagree	2	1	3	2	3	4	2	3	2	4	2	4	2	1	2	1	3
53	4	Male	1	Married	2	College/University or Above	4	Self-employed	3	PHP 10,000 or less	1	Urban	2	Region IV-A	No	2	2	2	2	4	2	3	1	1	1	3	2	3	2	1	1	Disagree	2	1	3	2	3	3	2	3	2	3	2	3	2	1	2	1	4
71	5	Male	1	Married	2	College/University or Above	4	Housewife/Retired/Unemployed/Other	5	PHP 10,000 to 20,000	2	Urban	2	NCR	Yes	1	2	1	2	5	3	3	1	1	1	2	1	4	2	1	1	Disagree	2	1	3	2	4	4	2	4	2	4	2	4	2	1	2	1	4
26	1	Male	1	Single	1	College/University or Above	4	Professional/White Collar Worker	2	PHP 10,000 or less	1	Rural	1	Region III	No	2	2	2	2	5	3	4	2	2	1	3	2	3	2	1	1	Strongly Disagree	1	1	3	2	3	3	2	3	2	3	2	3	2	1	2	1	3
24	1	Female	2	Single	1	College/University or Above	4	Self-employed	3	PHP 10,000 or less	1	Rural	1	Region III	No	2	2	2	2	5	3	3	1	1	1	1	1	3	2	4	1	Disagree	2	1	3	2	3	3	2	3	2	4	2	4	1	1	1	1	4
20	1	Female	2	Single	1	College/University or Above	4	Student	4	PHP 10,000 or less	1	Urban	2	NCR	No	2	2	2	2	5	3	3	1	2	1	2	1	2	1	1	1	Strongly Disagree	1	1	4	2	4	4	2	4	2	4	2	4	2	1	2	1	4
50	3	Female	2	Married	2	College/University or Above	4	Professional/White Collar Worker	2	PHP 20,000 to 100,000	3	Urban	2	NCR	No	2	2	1	1	3	1	3	1	2	1	3	2	3	2	4	1	Agree	3	2	3	2	3	3	2	3	2	4	2	4	2	1	2	1	4
52	4	Female	2	Single	1	College/University or Above	4	Professional/White Collar Worker	2	PHP 100,000 or more	4	Rural	1	Region I	No	2	2	1	1	4	2	2	1	2	1	2	1	2	1	1	1	Agree	3	2	4	2	4	4	2	3	2	4	2	4	2	1	2	1	4
56	4	Male	1	Married	2	College/University or Above	4	Professional/White Collar Worker	2	PHP 10,000 to 20,000	2	Urban	2	NCR	Yes	1	2	2	1	4	2	3	1	2	1	2	1	3	2	1	2	Agree	3	2	4	2	4	4	2	3	2	4	2	4	2	1	2	1	3
27	1	Female	2	Single	1	College/University or Above	4	Professional/White Collar Worker	2	PHP 20,000 to 100,000	3	Urban	2	NCR	Yes	1	2	1	2	4	2	2	1	2	1	2	1	2	1	1	3	Agree	3	2	4	2	4	4	2	3	2	4	2	4	2	1	2	1	4
44	3	Male	1	Married	2	College/University or Above	4	Professional/White Collar Worker	2	PHP 20,000 to 100,000	3	Urban	2	NCR	No	2	2	1	2	4	2	3	1	1	1	2	1	2	1	1	2	Agree	3	2	3	2	3	3	2	3	2	3	2	3	2	1	2	1	3
51	4	Female	2	Married	2	College/University or Above	4	Professional/White Collar Worker	2	PHP 20,000 to 100,000	3	Urban	2	NCR	No	2	2	1	2	4	2	1	1	1	1	2	1	2	1	1	1	Agree	3	2	3	2	3	3	2	3	2	3	2	3	1	1	1	1	4
44	3	Female	2	Married	2	College/University or Above	4	Professional/White Collar Worker	2	PHP 100,000 or more	4	Urban	2	Region VI	No	2	2	1	2	4	2	4	2	1	1	3	2	4	2	4	1	Agree	3	2	3	2	3	4	2	3	2	4	2	4	2	1	2	1	4
44	3	Female	2	Married	2	College/University or Above	4	Professional/White Collar Worker	2	PHP 20,000 to 100,000	3	Urban	2	NCR	No	2	2	2	2	4	2	4	2	2	1	3	2	3	2	4	2	Strongly Agree	4	2	4	2	4	4	2	4	2	4	2	4	2	1	2	1	3
28	1	Female	2	Single	1	College/University or Above	4	Professional/White Collar Worker	2	PHP 10,000 to 20,000	2	Urban	2	NCR	Yes	1	2	1	2	5	3	2	1	1	1	2	1	3	2	4	1	Strongly Agree	4	2	4	2	4	4	2	3	2	4	2	4	2	1	2	1	4
38	2	Female	2	Single	1	College/University or Above	4	Professional/White Collar Worker	2	PHP 20,000 to 100,000	3	Rural	1	Region VI	No	2	2	2	2	5	3	3	1	2	1	2	1	2	1	4	1	Disagree	2	1	3	2	3	3	2	2	1	2	1	3	3	2	2	1	4
75	5	Female	2	Married	2	College/University or Above	4	Housewife/Retired/Unemployed/Other	5	PHP 10,000 or less	1	Urban	2	NCR	No	2	1	1	1	4	2	1	1	2	1	2	1	2	1	1	1	Disagree	2	1	2	1	3	3	2	2	1	3	2	3	3	2	2	1	3
25	1	Male	1	Single	1	College/University or Above	4	Professional/White Collar Worker	2	PHP 10,000 to 20,000	2	Rural	1	Region IV-A	No	2	2	1	2	4	2	3	1	2	1	2	1	2	1	1	1	Strongly Disagree	1	1	2	1	3	4	2	2	1	3	2	3	3	2	2	1	4
52	4	Female	2	Single	1	College/University or Above	4	Professional/White Collar Worker	2	PHP 20,000 to 100,000	3	Urban	2	Region I	No	2	2	1	2	5	3	3	1	2	1	3	2	3	2	4	1	Disagree	2	1	2	1	2	3	2	2	1	3	2	3	3	2	2	1	4
21	1	Female	2	Single	1	College/University or Above	4	Student	4	PHP 10,000 or less	1	Rural	1	Region IV-A	No	2	2	2	2	3	1	4	2	2	1	3	2	3	2	1	2	Disagree	2	1	3	2	4	3	2	2	1	3	2	4	3	2	2	1	3
70	5	Female	2	Single	1	College/University or Above	4	Self-employed	3	PHP 20,000 to 100,000	3	Urban	2	NCR	Yes	1	2	1	1	4	2	2	1	2	1	2	1	2	1	1	4	Strongly Disagree	1	1	4	2	4	4	2	2	1	4	2	4	3	2	2	1	4
46	3	Female	2	Single	1	College/University or Above	4	Professional/White Collar Worker	2	PHP 10,000 to 20,000	2	Rural	1	Region XI	No	2	2	1	2	5	3	3	1	2	1	2	1	4	2	1	1	Disagree	2	1	3	2	3	3	2	2	1	3	2	3	3	2	2	1	4
66	5	Female	2	Single	1	College/University or Above	4	Professional/White Collar Worker	2	PHP 20,000 to 100,000	3	Urban	2	NCR	No	2	2	1	2	5	3	3	1	2	1	2	1	2	1	4	2	Disagree	2	1	3	2	3	3	2	2	1	4	2	4	3	2	2	1	3
46	3	Male	1	Married	2	College/University or Above	4	Professional/White Collar Worker	2	PHP 20,000 to 100,000	3	Urban	2	NCR	Yes	1	2	1	2	5	3	3	1	1	1	1	1	3	2	4	1	Disagree	2	1	4	2	4	4	2	2	1	3	2	4	3	2	2	1	4
21	1	Female	2	Single	1	College/University or Above	4	Student	4	PHP 10,000 or less	1	Rural	1	Region III	No	2	1	1	2	3	1	4	2	2	1	4	2	3	2	3	1	Agree	3	2	4	2	4	4	2	2	1	3	2	3	3	2	2	1	4
26	1	Female	2	Single	1	College/University or Above	4	Professional/White Collar Worker	2	PHP 10,000 to 20,000	2	Rural	1	Region VII	No	2	2	1	2	4	2	5	2	1	1	2	1	3	2	4	1	Agree	3	2	4	2	4	3	2	2	1	4	2	4	3	2	2	1	4
37	2	Male	1	Married	2	College/University or Above	4	Self-employed	3	PHP 20,000 to 100,000	3	Urban	2	Region IV-A	Yes	1	2	1	2	4	2	4	2	2	1	3	2	3	2	1	3	Agree	3	2	3	2	3	3	2	2	1	3	2	3	3	2	2	1	3
34	2	Female	2	Married	2	College/University or Above	4	Professional/White Collar Worker	2	PHP 20,000 to 100,000	3	Rural	1	Region VII	No	2	2	1	2	5	3	3	1	2	1	2	1	3	2	4	1	Agree	3	2	3	2	3	3	2	2	1	3	2	3	3	2	2	1	4
61	5	Female	2	Married	2	College/University or Above	4	Professional/White Collar Worker	2	PHP 20,000 to 100,000	3	Urban	2	Region XI	No	2	2	1	2	5	3	3	1	2	1	2	1	3	2	4	1	Strongly Agree	4	2	4	2	4	4	2	2	1	4	2	4	3	2	2	1	4
19	1	Female	2	Single	1	College/University or Above	4	Student	4	PHP 10,000 or less	1	Urban	2	Region IV-A	No	2	2	2	2	5	3	2	1	1	1	3	2	3	2	1	3	Strongly Agree	4	2	4	2	3	3	2	2	1	4	2	4	3	2	2	1	4
55	4	Male	1	Single	1	College/University or Above	4	Professional/White Collar Worker	2	PHP 20,000 to 100,000	3	Urban	2	NCR	No	2	2	1	1	3	1	3	1	1	1	3	2	4	2	4	1	Disagree	2	1	2	1	3	4	2	3	2	3	2	4	3	2	2	1	3
55	4	Male	1	Married	2	College/University or Above	4	Professional/White Collar Worker	2	PHP 100,000 or more	4	Urban	2	NCR	Yes	1	2	2	2	4	2	3	1	1	1	1	1	3	2	4	1	Disagree	2	1	2	1	3	3	2	3	2	3	2	3	3	2	2	1	4
62	5	Female	2	Married	2	College/University or Above	4	Housewife/Retired/Unemployed/Other	5	PHP 20,000 to 100,000	3	Urban	2	NCR	No	2	2	1	1	3	1	3	1	2	1	2	1	3	2	4	1	Disagree	2	1	3	2	4	4	2	3	2	4	2	4	3	2	2	1	3
30	1	Female	2	Single	1	College/University or Above	4	Professional/White Collar Worker	2	PHP 10,000 to 20,000	2	Urban	2	Region VII	No	2	2	1	2	3	1	3	1	2	1	2	1	2	1	1	1	Disagree	2	1	3	2	3	3	2	3	2	3	2	3	3	2	2	1	3
20	1	Male	1	Single	1	College/University or Above	4	Student	4	PHP 10,000 to 20,000	2	Urban	2	NCR	No	2	2	2	2	3	1	4	2	1	1	1	1	1	1	1	1	Disagree	2	1	4	2	4	4	2	4	2	4	2	4	3	2	2	1	4
23	1	Female	2	Single	1	College/University or Above	4	Professional/White Collar Worker	2	PHP 10,000 to 20,000	2	Urban	2	NCR	Yes	1	2	1	1	4	2	4	2	1	1	3	2	3	2	1	1	Strongly Disagree	1	1	3	2	4	4	2	4	2	4	2	4	3	2	2	1	4
19	1	Male	1	Single	1	College/University or Above	4	Student	4	PHP 10,000 or less	1	Urban	2	Region IV-A	No	2	2	1	2	4	2	3	1	1	1	1	1	3	2	4	3	Disagree	2	1	3	2	3	3	2	3	2	3	2	3	3	2	2	1	4
19	1	Male	1	Single	1	College/University or Above	4	Student	4	PHP 10,000 or less	1	Urban	2	NCR	No	2	2	1	2	4	2	2	1	2	1	2	1	2	1	1	2	Disagree	2	1	4	2	4	3	2	3	2	4	2	4	3	2	2	1	4
20	1	Female	2	Single	1	College/University or Above	4	Student	4	PHP 10,000 or less	1	Urban	2	NCR	Yes	1	2	1	2	4	2	4	2	1	1	3	2	3	2	4	1	Strongly Disagree	1	1	3	2	3	4	2	4	2	4	2	4	3	2	2	1	4
20	1	Female	2	Single	1	College/University or Above	4	Student	4	PHP 20,000 to 100,000	3	Urban	2	NCR	Yes	1	2	1	2	4	2	1	1	1	1	2	1	2	1	3	3	Strongly Disagree	1	1	4	2	4	4	2	4	2	4	2	4	3	2	2	1	4
21	1	Male	1	Single	1	College/University or Above	4	Student	4	PHP 20,000 to 100,000	3	Urban	2	NCR	No	2	2	1	2	4	2	3	1	2	1	2	1	2	1	1	3	Disagree	2	1	3	2	4	3	2	3	2	3	2	4	3	2	2	1	3
78	5	Female	2	Married	2	College/University or Above	4	Housewife/Retired/Unemployed/Other	5	PHP 20,000 to 100,000	3	Urban	2	NCR	No	2	2	1	2	4	2	2	1	2	1	2	1	2	1	4	1	Disagree	2	1	3	2	3	4	2	3	2	3	2	3	3	2	2	1	3
19	1	Female	2	Single	1	College/University or Above	4	Student	4	PHP 20,000 to 100,000	3	Rural	1	Region IV-A	No	2	2	1	2	5	3	3	1	1	1	2	1	2	1	1	2	Disagree	2	1	3	2	4	4	2	3	2	3	2	3	3	2	2	1	3
20	1	Male	1	Single	1	College/University or Above	4	Student	4	PHP 10,000 or less	1	Urban	2	NCR	No	2	2	1	2	5	3	4	2	1	1	1	1	3	2	1	1	Disagree	2	1	4	2	4	4	2	3	2	4	2	4	3	2	2	1	4
20	1	Female	2	Single	1	College/University or Above	4	Student	4	PHP 10,000 to 20,000	2	Urban	2	NCR	No	2	2	2	2	5	3	3	1	1	1	1	1	3	2	4	2	Disagree	2	1	4	2	4	4	2	4	2	4	2	4	3	2	2	1	4
59	4	Male	1	Married	2	College/University or Above	4	Professional/White Collar Worker	2	PHP 20,000 to 100,000	3	Urban	2	Region IV-A	No	2	2	2	2	5	3	3	1	2	1	2	1	3	2	4	2	Disagree	2	1	3	2	4	4	2	3	2	3	2	4	3	2	2	1	4
56	4	Male	1	Married	2	College/University or Above	4	Self-employed	3	PHP 10,000 or less	1	Urban	2	NCR	No	2	2	1	1	2	1	3	1	1	1	2	1	3	2	4	3	Agree	3	2	3	2	3	4	2	4	2	4	2	3	3	2	2	1	3
34	2	Male	1	Single	1	College/University or Above	4	Professional/White Collar Worker	2	PHP 10,000 to 20,000	2	Urban	2	NCR	No	2	2	1	2	3	1	4	2	3	2	3	2	3	2	1	4	Agree	3	2	3	2	4	3	2	3	2	3	2	4	3	2	2	1	4
38	2	Female	2	Single	1	College/University or Above	4	Professional/White Collar Worker	2	PHP 10,000 to 20,000	2	Urban	2	NCR	No	2	2	1	2	3	1	3	1	2	1	2	1	3	2	4	6	Strongly Agree	4	2	4	2	4	4	2	4	2	4	2	4	3	2	2	1	4
51	4	Male	1	Single	1	College/University or Above	4	Professional/White Collar Worker	2	PHP 20,000 to 100,000	3	Urban	2	NCR	No	2	2	1	1	4	2	3	1	1	1	2	1	3	2	1	3	Strongly Agree	4	2	4	2	4	4	2	4	2	4	2	4	3	2	2	1	4
55	4	Female	2	Married	2	College/University or Above	4	Professional/White Collar Worker	2	PHP 100,000 or more	4	Rural	1	Region IV-A	No	2	2	1	2	4	2	3	1	2	1	2	1	3	2	4	1	Agree	3	2	4	2	4	4	2	4	2	4	2	4	3	2	2	1	4
45	3	Female	2	Married	2	College/University or Above	4	Professional/White Collar Worker	2	PHP 20,000 to 100,000	3	Urban	2	NCR	Yes	1	2	1	2	4	2	3	1	1	1	2	1	4	2	4	3	Agree	3	2	3	2	3	4	2	3	2	4	2	4	3	2	2	1	4
55	4	Female	2	Married	2	College/University or Above	4	Self-employed	3	PHP 20,000 to 100,000	3	Urban	2	NCR	Yes	1	2	1	2	4	2	4	2	2	1	2	1	3	2	4	3	Agree	3	2	3	2	3	4	2	3	2	4	2	4	3	2	2	1	4
40	2	Female	2	Married	2	College/University or Above	4	Professional/White Collar Worker	2	PHP 100,000 or more	4	Urban	2	Region VII	No	2	2	1	2	4	2	1	1	1	1	2	1	2	1	1	1	Agree	3	2	4	2	4	4	2	3	2	4	2	4	3	2	2	1	4
23	1	Female	2	Single	1	College/University or Above	4	Professional/White Collar Worker	2	PHP 10,000 to 20,000	2	Urban	2	NCR	No	2	2	1	2	5	3	4	2	1	1	3	2	4	2	4	1	Agree	3	2	4	2	4	4	2	3	2	4	2	4	3	2	2	1	4
40	2	Female	2	Married	2	College/University or Above	4	Professional/White Collar Worker	2	PHP 100,000 or more	4	Urban	2	Region VI	No	2	2	1	2	5	3	3	1	2	1	2	1	2	1	1	3	Strongly Agree	4	2	4	2	4	4	2	4	2	4	2	4	3	2	2	1	4
49	3	Male	1	Married	2	College/University or Above	4	Housewife/Retired/Unemployed/Other	5	PHP 10,000 or less	1	Rural	1	Region IV-A	No	2	2	2	2	3	1	3	1	2	1	2	1	3	2	4	4	Disagree	2	1	3	2	3	4	2	2	1	4	2	3	2	1	3	2	4
50	3	Female	2	Married	2	College/University or Above	4	Professional/White Collar Worker	2	PHP 20,000 to 100,000	3	Urban	2	NCR	Yes	1	2	1	2	5	3	1	1	1	1	1	1	1	1	1	1	Disagree	2	1	4	2	4	3	2	2	1	4	2	4	2	1	3	2	4
50	3	Female	2	Single	1	College/University or Above	4	Professional/White Collar Worker	2	PHP 20,000 to 100,000	3	Rural	1	Region II	No	2	2	1	2	4	2	3	1	1	1	1	1	4	2	4	3	Agree	3	2	3	2	3	3	2	1	1	3	2	3	2	1	3	2	4
54	4	Female	2	Married	2	College/University or Above	4	Housewife/Retired/Unemployed/Other	5	PHP 20,000 to 100,000	3	Urban	2	Region VII	No	2	2	1	1	3	1	3	1	1	1	1	1	3	2	4	2	Disagree	2	1	3	2	4	2	1	3	2	4	2	4	2	1	3	2	4
52	4	Female	2	Single	1	College/University or Above	4	Professional/White Collar Worker	2	PHP 20,000 to 100,000	3	Urban	2	NCR	No	2	2	1	1	4	2	2	1	1	1	1	1	3	2	4	2	Strongly Disagree	1	1	1	1	1	3	2	3	2	4	2	1	2	1	3	2	3
60	4	Male	1	Married	2	College/University or Above	4	Self-employed	3	PHP 10,000 to 20,000	2	Urban	2	Region I	No	2	2	1	2	4	2	2	1	1	1	2	1	4	2	4	1	Strongly Disagree	1	1	2	1	2	3	2	3	2	3	2	3	2	1	3	2	4
27	1	Male	1	Single	1	College/University or Above	4	Housewife/Retired/Unemployed/Other	5	PHP 20,000 to 100,000	3	Rural	1	Region IV-A	No	2	2	2	2	5	3	1	1	1	1	4	2	3	2	1	1	Strongly Disagree	1	1	1	1	1	4	2	4	2	4	2	4	2	1	3	2	4
19	1	Female	2	Single	1	College/University or Above	4	Student	4	PHP 10,000 or less	1	Urban	2	NCR	No	2	2	2	2	4	2	3	1	2	1	2	1	3	2	1	4	Disagree	2	1	4	2	4	4	2	4	2	4	2	4	2	1	3	2	4
20	1	Female	2	Single	1	College/University or Above	4	Professional/White Collar Worker	2	PHP 10,000 to 20,000	2	Rural	1	Region III	No	2	2	2	2	5	3	3	1	2	1	2	1	3	2	4	1	Disagree	2	1	3	2	3	3	2	3	2	4	2	4	2	1	3	2	3
30	1	Female	2	Single	1	College/University or Above	4	Professional/White Collar Worker	2	PHP 20,000 to 100,000	3	Rural	1	Region VIII	No	2	2	1	2	4	2	4	2	1	1	2	1	3	2	1	2	Agree	3	2	4	2	4	4	2	3	2	4	2	4	2	1	4	2	4
42	3	Male	1	Single	1	College/University or Above	4	Housewife/Retired/Unemployed/Other	5	PHP 20,000 to 100,000	3	Urban	2	Region VIII	No	2	2	1	1	4	2	4	2	1	1	4	2	4	2	4	3	Strongly Disagree	1	1	2	1	2	2	1	2	1	2	1	3	3	2	3	2	4
69	5	Female	2	Married	2	College/University or Above	4	Housewife/Retired/Unemployed/Other	5	PHP 100,000 or more	4	Rural	1	NCR	No	2	2	1	2	4	2	4	2	2	1	2	1	2	1	1	4	Disagree	2	1	2	1	2	2	1	2	1	2	1	2	3	2	3	2	4
27	1	Male	1	Single	1	College/University or Above	4	Professional/White Collar Worker	2	PHP 20,000 to 100,000	3	Urban	2	Region III	No	2	2	2	2	4	2	3	1	2	1	2	1	2	1	1	3	Disagree	2	1	2	1	2	2	1	2	1	2	1	2	3	2	3	2	3
63	5	Female	2	Married	2	College/University or Above	4	Self-employed	3	PHP 100,000 or more	4	Urban	2	Region X	No	2	2	1	2	5	3	3	1	1	1	1	1	3	2	4	1	Disagree	2	1	2	1	3	2	1	2	1	2	1	3	3	2	3	2	4
68	5	Female	2	Married	2	College/University or Above	4	Housewife/Retired/Unemployed/Other	5	PHP 20,000 to 100,000	3	Urban	2	Region VII	No	2	1	2	2	5	3	3	1	2	1	2	1	3	2	4	1	Disagree	2	1	2	1	2	2	1	2	1	2	1	2	3	2	3	2	3
19	1	Male	1	Single	1	College/University or Above	4	Student	4	PHP 10,000 or less	1	Urban	2	NCR	No	2	2	1	2	4	2	3	1	2	1	3	2	3	2	1	1	Disagree	2	1	3	2	3	2	1	2	1	2	1	3	3	2	3	2	4
66	5	Female	2	Single	1	College/University or Above	4	Housewife/Retired/Unemployed/Other	5	PHP 10,000 to 20,000	2	Urban	2	NCR	Yes	1	2	1	1	4	2	4	2	2	1	2	1	3	2	4	1	Disagree	2	1	2	1	2	3	2	2	1	2	1	2	3	2	3	2	3
25	1	Female	2	Single	1	College/University or Above	4	Professional/White Collar Worker	2	PHP 20,000 to 100,000	3	Urban	2	NCR	No	2	2	1	2	4	2	3	1	2	1	3	2	3	2	1	3	Disagree	2	1	2	1	2	3	2	2	1	2	1	3	3	2	3	2	3
65	5	Female	2	Married	2	College/University or Above	4	Housewife/Retired/Unemployed/Other	5	PHP 20,000 to 100,000	3	Rural	1	Region VI	No	2	1	1	2	5	3	2	1	2	1	2	1	3	2	1	1	Strongly Disagree	1	1	2	1	2	3	2	2	1	2	1	3	3	2	3	2	3
39	2	Female	2	Single	1	College/University or Above	4	Professional/White Collar Worker	2	PHP 20,000 to 100,000	3	Rural	1	Region VII	No	2	2	1	2	5	3	1	1	1	1	2	1	2	1	1	1	Strongly Disagree	1	1	2	1	2	4	2	1	1	2	1	2	3	2	3	2	4
45	3	Male	1	Single	1	College/University or Above	4	Professional/White Collar Worker	2	PHP 20,000 to 100,000	3	Urban	2	Region V	No	2	2	1	2	5	3	3	1	1	1	1	1	3	2	1	1	Disagree	2	1	2	1	2	3	2	2	1	2	1	3	3	2	3	2	4
54	4	Male	1	Single	1	College/University or Above	4	Professional/White Collar Worker	2	PHP 20,000 to 100,000	3	Urban	2	NCR	Yes	1	2	1	2	5	3	4	2	2	1	3	2	4	2	4	3	Disagree	2	1	2	1	4	4	2	1	1	2	1	4	3	2	3	2	3
20	1	Male	1	Single	1	College/University or Above	4	Student	4	PHP 10,000 or less	1	Urban	2	NCR	No	2	2	1	2	5	3	3	1	1	1	2	1	3	2	4	2	Agree	3	2	1	1	3	4	2	2	1	1	1	3	3	2	3	2	3
54	4	Female	2	Married	2	College/University or Above	4	Housewife/Retired/Unemployed/Other	5	PHP 20,000 to 100,000	3	Urban	2	Region IV-A	No	2	1	1	1	4	2	4	2	1	1	1	1	3	2	1	2	Disagree	2	1	3	2	3	3	2	2	1	2	1	3	3	2	3	2	4
25	1	Female	2	Single	1	College/University or Above	4	Professional/White Collar Worker	2	PHP 10,000 to 20,000	2	Rural	1	NCR	No	2	2	1	2	4	2	3	1	2	1	2	1	3	2	4	1	Disagree	2	1	3	2	3	3	2	1	1	1	1	2	3	2	3	2	3
42	3	Male	1	Married	2	College/University or Above	4	Professional/White Collar Worker	2	PHP 20,000 to 100,000	3	Urban	2	NCR	No	2	2	2	2	4	2	4	2	2	1	1	1	4	2	4	3	Disagree	2	1	3	2	3	4	2	2	1	2	1	3	4	2	4	2	3
47	3	Female	2	Single	1	College/University or Above	4	Housewife/Retired/Unemployed/Other	5	PHP 10,000 or less	1	Rural	1	Region I	No	2	2	1	2	5	3	2	1	2	1	2	1	3	2	1	1	Disagree	2	1	3	2	3	3	2	2	1	2	1	3	3	2	3	2	4
19	1	Male	1	Single	1	College/University or Above	4	Student	4	PHP 100,000 or more	4	Urban	2	NCR	Yes	1	2	1	2	5	3	4	2	2	1	2	1	3	2	1	2	Disagree	2	1	4	2	4	4	2	2	1	2	1	4	3	2	3	2	4
19	1	Female	2	Single	1	College/University or Above	4	Student	4	PHP 10,000 to 20,000	2	Rural	1	Region IV-A	No	2	2	1	2	5	3	2	1	2	1	3	2	2	1	3	3	Agree	3	2	3	2	4	4	2	2	1	2	1	4	4	2	4	2	4
22	1	Male	1	Single	1	College/University or Above	4	Student	4	PHP 10,000 or less	1	Urban	2	Region X	No	2	2	2	2	5	3	5	2	1	1	2	1	3	2	4	4	Agree	3	2	3	2	4	4	2	2	1	2	1	4	4	2	3	2	3
19	1	Female	2	Single	1	College/University or Above	4	Student	4	PHP 10,000 or less	1	Urban	2	NCR	No	2	2	1	2	4	2	4	2	1	1	3	2	3	2	3	3	Strongly Disagree	1	1	2	1	3	4	2	3	2	2	1	3	3	2	3	2	4
21	1	Female	2	Single	1	College/University or Above	4	Student	4	PHP 20,000 to 100,000	3	Rural	1	NCR	Yes	1	2	1	2	2	1	3	1	2	1	2	1	2	1	1	2	Agree	3	2	3	2	3	3	2	3	2	2	1	3	3	2	3	2	4
69	5	Male	1	Single	1	College/University or Above	4	Housewife/Retired/Unemployed/Other	5	PHP 10,000 to 20,000	2	Urban	2	NCR	No	2	2	2	2	4	2	3	1	2	1	2	1	3	2	4	1	Disagree	2	1	2	1	2	2	1	2	1	3	2	3	3	2	3	2	3
19	1	Female	2	Single	1	College/University or Above	4	Student	4	PHP 10,000 or less	1	Rural	1	Region III	No	2	2	1	2	4	2	2	1	1	1	3	2	3	2	3	2	Strongly Disagree	1	1	3	2	4	2	1	2	1	3	2	4	3	2	3	2	4
42	3	Female	2	Single	1	College/University or Above	4	Professional/White Collar Worker	2	PHP 20,000 to 100,000	3	Rural	1	Region III	No	2	2	1	2	4	2	4	2	2	1	2	1	3	2	4	3	Disagree	2	1	3	2	3	2	1	2	1	3	2	4	3	2	3	2	4
21	1	Female	2	Single	1	College/University or Above	4	Student	4	PHP 10,000 or less	1	Urban	2	NCR	No	2	2	1	2	5	3	4	2	1	1	2	1	3	2	4	2	Disagree	2	1	3	2	3	2	1	2	1	3	2	3	3	2	3	2	3
22	1	Male	1	Single	1	College/University or Above	4	Professional/White Collar Worker	2	PHP 20,000 to 100,000	3	Urban	2	Region IV-A	No	2	2	1	2	5	3	5	2	1	1	4	2	4	2	1	1	Strongly Disagree	1	1	4	2	4	2	1	2	1	4	2	4	3	2	3	2	4
60	4	Female	2	Married	2	College/University or Above	4	Professional/White Collar Worker	2	PHP 20,000 to 100,000	3	Urban	2	Region X	No	2	2	1	2	5	3	4	2	2	1	2	1	3	2	4	1	Strongly Disagree	1	1	3	2	3	2	1	2	1	4	2	4	3	2	3	2	3
31	2	Female	2	Married	2	College/University or Above	4	Professional/White Collar Worker	2	PHP 10,000 to 20,000	2	Urban	2	Region VII	No	2	2	2	2	5	3	3	1	1	1	2	1	3	2	4	3	Disagree	2	1	4	2	4	2	1	1	1	4	2	4	3	2	3	2	4
50	3	Male	1	Married	2	College/University or Above	4	Self-employed	3	PHP 100,000 or more	4	Urban	2	NCR	No	2	2	1	2	3	1	3	1	2	1	2	1	3	2	4	1	Disagree	2	1	2	1	2	3	2	2	1	3	2	3	3	2	3	2	4
53	4	Female	2	Married	2	College/University or Above	4	Professional/White Collar Worker	2	PHP 20,000 to 100,000	3	Urban	2	NCR	Yes	1	2	1	1	4	2	3	1	1	1	2	1	3	2	4	1	Disagree	2	1	2	1	2	3	2	2	1	3	2	3	3	2	3	2	4
67	5	Female	2	Married	2	College/University or Above	4	Housewife/Retired/Unemployed/Other	5	PHP 20,000 to 100,000	3	Urban	2	Region X	No	2	2	1	1	4	2	2	1	2	1	2	1	2	1	1	1	Disagree	2	1	2	1	2	3	2	2	1	3	2	2	3	2	3	2	3
44	3	Female	2	Married	2	College/University or Above	4	Professional/White Collar Worker	2	PHP 20,000 to 100,000	3	Rural	1	Region VII	No	2	2	1	2	4	2	3	1	1	1	3	2	3	2	1	3	Strongly Disagree	1	1	1	1	2	3	2	2	1	3	2	3	3	2	3	2	3
21	1	Female	2	Single	1	College/University or Above	4	Student	4	PHP 10,000 or less	1	Urban	2	NCR	Yes	1	2	1	2	4	2	4	2	2	1	3	2	4	2	1	3	Strongly Disagree	1	1	2	1	4	3	2	2	1	3	2	4	4	2	4	2	3
23	1	Male	1	Single	1	College/University or Above	4	Student	4	PHP 10,000 or less	1	Urban	2	NCR	No	2	2	1	2	4	2	3	1	3	2	3	2	3	2	1	2	Disagree	2	1	2	1	2	3	2	2	1	4	2	4	3	2	3	2	3
62	5	Male	1	Married	2	College/University or Above	4	Professional/White Collar Worker	2	PHP 20,000 to 100,000	3	Urban	2	NCR	No	2	2	1	2	4	2	5	2	2	1	2	1	3	2	4	1	Disagree	2	1	2	1	3	3	2	2	1	3	2	3	3	2	3	2	3
51	4	Female	2	Married	2	College/University or Above	4	Self-employed	3	PHP 20,000 to 100,000	3	Urban	2	NCR	No	2	2	1	2	4	2	3	1	1	1	1	1	3	2	4	3	Disagree	2	1	2	1	3	3	2	2	1	3	2	3	3	2	3	2	4
19	1	Male	1	Single	1	College/University or Above	4	Student	4	PHP 10,000 or less	1	Urban	2	Region IV-A	No	2	2	2	2	4	2	3	1	2	1	3	2	3	2	1	1	Strongly Disagree	1	1	2	1	2	3	2	2	1	3	2	3	3	2	3	2	4
20	1	Female	2	Single	1	College/University or Above	4	Student	4	PHP 10,000 or less	1	Urban	2	Region VII	No	2	2	1	2	5	3	5	2	2	1	3	2	3	2	1	2	Disagree	2	1	2	1	3	4	2	2	1	3	2	3	3	2	3	2	4
53	4	Female	2	Married	2	College/University or Above	4	Self-employed	3	PHP 10,000 to 20,000	2	Urban	2	Region IV-A	Yes	1	2	1	2	5	3	3	1	2	1	2	1	3	2	4	3	Disagree	2	1	2	1	3	3	2	2	1	3	2	3	3	2	3	2	3
26	1	Female	2	Single	1	College/University or Above	4	Professional/White Collar Worker	2	PHP 20,000 to 100,000	3	Urban	2	Region IV-A	No	2	2	1	2	5	3	4	2	2	1	2	1	3	2	4	1	Disagree	2	1	2	1	4	3	2	2	1	3	2	4	3	2	3	2	4
20	1	Female	2	Single	1	College/University or Above	4	Student	4	PHP 10,000 or less	1	Urban	2	NCR	No	2	2	2	2	5	3	4	2	1	1	2	1	2	1	1	1	Strongly Disagree	1	1	1	1	1	3	2	2	1	4	2	4	3	2	3	2	4
25	1	Female	2	Single	1	College/University or Above	4	Professional/White Collar Worker	2	PHP 20,000 to 100,000	3	Urban	2	NCR	No	2	2	1	2	4	2	4	2	1	1	3	2	4	2	1	4	Agree	3	2	2	1	3	3	2	2	1	3	2	3	3	2	3	2	4
51	4	Female	2	Married	2	College/University or Above	4	Professional/White Collar Worker	2	PHP 20,000 to 100,000	3	Rural	1	Region XI	No	2	2	1	1	3	1	3	1	2	1	2	1	2	1	1	2	Strongly Disagree	1	1	3	2	3	3	2	2	1	3	2	3	3	2	3	2	4
20	1	Female	2	Single	1	College/University or Above	4	Student	4	PHP 10,000 or less	1	Rural	1	Region I	No	2	2	2	1	3	1	3	1	1	1	2	1	3	2	4	3	Disagree	2	1	3	2	4	3	2	2	1	3	2	4	3	2	3	2	4
57	4	Female	2	Married	2	College/University or Above	4	Housewife/Retired/Unemployed/Other	5	PHP 10,000 or less	1	Urban	2	NCR	No	2	2	1	2	3	1	3	1	2	1	2	1	3	2	1	1	Disagree	2	1	3	2	3	4	2	2	1	3	2	3	3	2	3	2	4
35	2	Male	1	Single	1	College/University or Above	4	Professional/White Collar Worker	2	PHP 100,000 or more	4	Urban	2	NCR	No	2	2	1	2	3	1	5	2	1	1	1	1	3	2	1	1	Disagree	2	1	3	2	3	3	2	2	1	3	2	3	3	2	3	2	3
55	4	Female	2	Married	2	College/University or Above	4	Professional/White Collar Worker	2	PHP 100,000 or more	4	Urban	2	NCR	No	2	2	1	2	3	1	3	1	2	1	2	1	3	2	4	3	Disagree	2	1	3	2	3	3	2	2	1	3	2	3	3	2	3	2	3
41	3	Male	1	Single	1	College/University or Above	4	Professional/White Collar Worker	2	PHP 10,000 or less	1	Urban	2	Region VI	No	2	2	2	2	3	1	3	1	1	1	1	1	3	2	4	1	Disagree	2	1	3	2	3	4	2	2	1	4	2	4	3	2	3	2	3
53	4	Female	2	Married	2	College/University or Above	4	Professional/White Collar Worker	2	PHP 100,000 or more	4	Rural	1	Region VI	No	2	1	1	1	4	2	4	2	2	1	2	1	3	2	1	1	Disagree	2	1	3	2	3	3	2	2	1	3	2	3	3	2	3	2	3
57	4	Female	2	Married	2	College/University or Above	4	Professional/White Collar Worker	2	PHP 20,000 to 100,000	3	Urban	2	Region III	No	2	2	1	1	4	2	3	1	2	1	2	1	2	1	1	1	Disagree	2	1	3	2	3	3	2	2	1	4	2	4	3	2	3	2	4
60	4	Male	1	Single	1	College/University or Above	4	Self-employed	3	PHP 10,000 or less	1	Rural	1	Region II	No	2	2	1	2	4	2	4	2	2	1	2	1	3	2	4	1	Strongly Disagree	1	1	3	2	3	3	2	2	1	3	2	3	3	2	3	2	4
20	1	Male	1	Single	1	College/University or Above	4	Student	4	PHP 10,000 or less	1	Rural	1	Region II	No	2	2	1	2	4	2	4	2	3	2	3	2	4	2	4	3	Disagree	2	1	3	2	2	3	2	2	1	4	2	3	4	2	4	2	4
21	1	Female	2	Single	1	College/University or Above	4	Student	4	PHP 10,000 or less	1	Rural	1	CAR	No	2	2	1	2	4	2	2	1	2	1	2	1	3	2	4	2	Disagree	2	1	4	2	4	4	2	2	1	4	2	4	3	2	3	2	4
24	1	Female	2	Single	1	College/University or Above	4	Professional/White Collar Worker	2	PHP 10,000 to 20,000	2	Rural	1	Region VI	No	2	2	1	2	4	2	3	1	2	1	3	2	3	2	4	2	Strongly Disagree	1	1	3	2	3	3	2	2	1	3	2	3	3	2	3	2	4
44	3	Male	1	Married	2	College/University or Above	4	Blue Collar Worker	1	PHP 20,000 to 100,000	3	Rural	1	Region IV-A	No	2	2	1	2	4	2	4	2	2	1	2	1	2	1	1	1	Disagree	2	1	3	2	3	3	2	2	1	3	2	3	3	2	3	2	3
55	4	Female	2	Married	2	College/University or Above	4	Self-employed	3	PHP 20,000 to 100,000	3	Rural	1	Region VIII	No	2	2	1	2	4	2	4	2	3	2	4	2	4	2	4	3	Disagree	2	1	3	2	3	3	2	2	1	3	2	3	3	2	3	2	4
19	1	Male	1	Single	1	College/University or Above	4	Student	4	PHP 10,000 or less	1	Urban	2	NCR	No	2	2	1	2	4	2	4	2	1	1	4	2	4	2	4	4	Strongly Disagree	1	1	3	2	4	3	2	2	1	3	2	4	4	2	4	2	3
20	1	Female	2	Single	1	College/University or Above	4	Student	4	PHP 10,000 or less	1	Urban	2	Region IV-A	No	2	2	1	2	4	2	3	1	1	1	3	2	3	2	4	3	Strongly Disagree	1	1	3	2	3	3	2	2	1	4	2	4	3	2	3	2	3
20	1	Male	1	Single	1	College/University or Above	4	Student	4	PHP 10,000 or less	1	Urban	2	Region IV-A	No	2	2	1	2	4	2	5	2	1	1	2	1	3	2	4	3	Disagree	2	1	3	2	4	4	2	2	1	4	2	4	4	2	4	2	3
21	1	Female	2	Single	1	College/University or Above	4	Student	4	PHP 10,000 or less	1	Urban	2	NCR	Yes	1	2	1	2	4	2	5	2	1	1	2	1	3	2	4	3	Disagree	2	1	4	2	4	4	2	2	1	4	2	4	4	2	4	2	4
22	1	Female	2	Single	1	College/University or Above	4	Student	4	PHP 10,000 or less	1	Urban	2	NCR	Yes	1	2	1	2	4	2	3	1	2	1	2	1	2	1	1	1	Disagree	2	1	3	2	3	4	2	2	1	4	2	4	3	2	3	2	3
70	5	Female	2	Married	2	College/University or Above	4	Housewife/Retired/Unemployed/Other	5	PHP 10,000 or less	1	Urban	2	NCR	No	2	2	1	2	4	2	3	1	1	1	2	1	3	2	1	1	Disagree	2	1	3	2	3	4	2	2	1	3	2	4	3	2	3	2	4
24	1	Female	2	Single	1	College/University or Above	4	Professional/White Collar Worker	2	PHP 10,000 to 20,000	2	Urban	2	NCR	No	2	2	1	2	4	2	2	1	2	1	2	1	2	1	1	3	Disagree	2	1	3	2	4	3	2	2	1	3	2	4	3	2	3	2	4
28	1	Female	2	Single	1	College/University or Above	4	Professional/White Collar Worker	2	PHP 10,000 to 20,000	2	Urban	2	Region III	No	2	2	1	2	4	2	3	1	2	1	2	1	2	1	1	1	Disagree	2	1	3	2	4	3	2	2	1	4	2	3	3	2	3	2	3
26	1	Female	2	Single	1	College/University or Above	4	Professional/White Collar Worker	2	PHP 20,000 to 100,000	3	Urban	2	NCR	No	2	2	1	2	4	2	4	2	2	1	3	2	3	2	4	3	Disagree	2	1	3	2	4	4	2	2	1	3	2	4	3	2	3	2	4
27	1	Female	2	Single	1	College/University or Above	4	Professional/White Collar Worker	2	PHP 20,000 to 100,000	3	Urban	2	NCR	No	2	2	1	2	4	2	4	2	2	1	2	1	3	2	4	1	Disagree	2	1	3	2	4	3	2	2	1	3	2	3	3	2	3	2	4
48	3	Female	2	Married	2	College/University or Above	4	Professional/White Collar Worker	2	PHP 20,000 to 100,000	3	Urban	2	NCR	No	2	2	1	2	4	2	3	1	2	1	2	1	2	1	1	3	Disagree	2	1	3	2	3	3	2	2	1	3	2	3	3	2	3	2	3
60	4	Female	2	Married	2	College/University or Above	4	Professional/White Collar Worker	2	PHP 20,000 to 100,000	3	Urban	2	NCR	Yes	1	2	1	2	4	2	3	1	2	1	2	1	3	2	1	2	Disagree	2	1	3	2	3	3	2	2	1	3	2	3	3	2	3	2	4
20	1	Female	2	Single	1	College/University or Above	4	Student	4	PHP 20,000 to 100,000	3	Urban	2	Region VII	No	2	2	1	2	4	2	4	2	2	1	2	1	2	1	1	4	Disagree	2	1	3	2	4	4	2	2	1	4	2	4	4	2	4	2	4
29	1	Female	2	Single	1	College/University or Above	4	Professional/White Collar Worker	2	PHP 10,000 to 20,000	2	Rural	1	Region VII	No	2	2	2	2	4	2	4	2	2	1	3	2	4	2	4	3	Disagree	2	1	3	2	3	3	2	2	1	3	2	3	3	2	3	2	3
23	1	Female	2	Single	1	College/University or Above	4	Professional/White Collar Worker	2	PHP 10,000 or less	1	Urban	2	NCR	No	2	2	2	2	4	2	3	1	2	1	3	2	3	2	4	1	Disagree	2	1	3	2	3	4	2	2	1	3	2	3	3	2	3	2	3
63	5	Male	1	Married	2	College/University or Above	4	Housewife/Retired/Unemployed/Other	5	PHP 10,000 to 20,000	2	Urban	2	Region IV-A	No	2	2	2	2	4	2	3	1	2	1	3	2	3	2	1	3	Disagree	2	1	3	2	3	3	2	2	1	3	2	3	3	2	3	2	3
26	1	Female	2	Married	2	College/University or Above	4	Professional/White Collar Worker	2	PHP 10,000 to 20,000	2	Rural	1	Region VI	No	2	2	1	2	5	3	3	1	2	1	2	1	2	1	1	2	Disagree	2	1	4	2	4	4	2	2	1	3	2	4	3	2	3	2	3
20	1	Male	1	Single	1	College/University or Above	4	Student	4	PHP 10,000 or less	1	Urban	2	Region IV-A	No	2	2	1	2	5	3	3	1	2	1	2	1	3	2	1	2	Disagree	2	1	3	2	3	3	2	2	1	3	2	3	3	2	3	2	3
23	1	Male	1	Single	1	College/University or Above	4	Professional/White Collar Worker	2	PHP 20,000 to 100,000	3	Urban	2	Region IV-A	No	2	2	1	2	5	3	3	1	3	2	3	2	3	2	1	3	Strongly Disagree	1	1	4	2	4	4	2	2	1	4	2	4	4	2	3	2	4
28	1	Female	2	Single	1	College/University or Above	4	Professional/White Collar Worker	2	PHP 20,000 to 100,000	3	Urban	2	Region IX	No	2	2	1	2	5	3	4	2	2	1	2	1	2	1	1	3	Disagree	2	1	4	2	4	3	2	2	1	4	2	4	3	2	3	2	4
33	2	Male	1	Single	1	College/University or Above	4	Professional/White Collar Worker	2	PHP 20,000 to 100,000	3	Urban	2	NCR	No	2	2	1	2	5	3	5	2	3	2	2	1	3	2	1	1	Disagree	2	1	3	2	3	4	2	2	1	3	2	3	3	2	3	2	3
43	3	Female	2	Married	2	College/University or Above	4	Professional/White Collar Worker	2	PHP 20,000 to 100,000	3	Urban	2	Region VII	No	2	2	1	2	5	3	2	1	1	1	1	1	1	1	1	1	Disagree	2	1	3	2	3	3	2	2	1	3	2	3	3	2	3	2	3
45	3	Female	2	Married	2	College/University or Above	4	Professional/White Collar Worker	2	PHP 20,000 to 100,000	3	Urban	2	Region IV-A	No	2	2	1	2	5	3	4	2	3	2	3	2	3	2	4	3	Disagree	2	1	3	2	3	3	2	2	1	3	2	3	3	2	3	2	3
45	3	Female	2	Married	2	College/University or Above	4	Self-employed	3	PHP 20,000 to 100,000	3	Urban	2	NCR	No	2	2	1	2	5	3	4	2	1	1	2	1	3	2	4	3	Disagree	2	1	3	2	3	3	2	2	1	3	2	4	3	2	3	2	3
18	1	Female	2	Single	1	College/University or Above	4	Student	4	PHP 20,000 to 100,000	3	Urban	2	Region II	No	2	2	1	2	5	3	3	1	1	1	2	1	3	2	4	1	Strongly Disagree	1	1	3	2	3	4	2	2	1	3	2	4	3	2	3	2	4
20	1	Female	2	Single	1	College/University or Above	4	Student	4	PHP 20,000 to 100,000	3	Urban	2	NCR	Yes	1	2	1	2	5	3	4	2	2	1	2	1	3	2	4	3	Strongly Disagree	1	1	3	2	3	3	2	2	1	3	2	3	3	2	3	2	4
21	1	Female	2	Single	1	College/University or Above	4	Student	4	PHP 20,000 to 100,000	3	Urban	2	NCR	No	2	2	1	2	5	3	4	2	2	1	2	1	3	2	4	3	Disagree	2	1	3	2	3	3	2	2	1	3	2	3	3	2	3	2	4
36	2	Male	1	Single	1	College/University or Above	4	Professional/White Collar Worker	2	PHP 100,000 or more	4	Urban	2	Region IV-A	No	2	2	1	2	5	3	4	2	2	1	2	1	3	2	4	3	Disagree	2	1	3	2	3	3	2	2	1	3	2	3	3	2	3	2	3
57	4	Male	1	Married	2	College/University or Above	4	Professional/White Collar Worker	2	PHP 100,000 or more	4	Urban	2	Region XI	No	2	2	1	2	5	3	4	2	2	1	2	1	2	1	1	1	Disagree	2	1	3	2	3	3	2	2	1	3	2	3	3	2	3	2	3
42	3	Female	2	Married	2	College/University or Above	4	Professional/White Collar Worker	2	PHP 10,000 to 20,000	2	Rural	1	Region VII	No	2	2	2	2	5	3	4	2	2	1	3	2	3	2	4	1	Disagree	2	1	3	2	3	3	2	2	1	3	2	3	3	2	3	2	3
19	1	Female	2	Single	1	College/University or Above	4	Student	4	PHP 10,000 or less	1	Urban	2	Region VII	No	2	2	2	2	5	3	2	1	1	1	2	1	2	1	4	1	Disagree	2	1	4	2	4	4	2	2	1	4	2	4	3	2	3	2	4
28	1	Female	2	Married	2	College/University or Above	4	Professional/White Collar Worker	2	PHP 20,000 to 100,000	3	Urban	2	NCR	No	2	2	2	2	5	3	5	2	3	2	3	2	3	2	4	3	Disagree	2	1	3	2	3	3	2	2	1	3	2	3	3	2	3	2	3
30	1	Male	1	Single	1	College/University or Above	4	Blue Collar Worker	1	PHP 10,000 to 20,000	2	Urban	2	NCR	No	2	2	1	2	3	1	3	1	2	1	2	1	3	2	4	2	Strongly Agree	4	2	4	2	2	3	2	2	1	4	2	4	3	2	3	2	4
20	1	Male	1	Single	1	College/University or Above	4	Student	4	PHP 10,000 or less	1	Urban	2	NCR	No	2	2	1	2	4	2	4	2	2	1	3	2	4	2	4	6	Agree	3	2	3	2	4	4	2	2	1	3	2	4	4	2	4	2	3
60	4	Female	2	Single	1	College/University or Above	4	Housewife/Retired/Unemployed/Other	5	PHP 10,000 to 20,000	2	Urban	2	Region XI	No	2	2	1	2	4	2	4	2	3	2	3	2	4	2	4	3	Agree	3	2	3	2	4	4	2	2	1	4	2	4	3	2	4	2	4
32	2	Female	2	Single	1	College/University or Above	4	Professional/White Collar Worker	2	PHP 20,000 to 100,000	3	Urban	2	NCR	No	2	2	1	2	4	2	3	1	2	1	2	1	2	1	1	3	Agree	3	2	3	2	4	4	2	2	1	3	2	4	3	2	3	2	4
58	4	Female	2	Single	1	College/University or Above	4	Professional/White Collar Worker	2	PHP 20,000 to 100,000	3	Urban	2	Region IV-A	No	2	2	1	2	4	2	3	1	1	1	3	2	3	2	4	1	Agree	3	2	3	2	3	3	2	2	1	4	2	3	3	2	3	2	4
57	4	Female	2	Married	2	College/University or Above	4	Housewife/Retired/Unemployed/Other	5	PHP 20,000 to 100,000	3	Urban	2	NCR	No	2	2	1	2	4	2	4	2	1	1	1	1	4	2	4	1	Agree	3	2	4	2	4	4	2	2	1	4	2	4	4	2	4	2	4
20	1	Female	2	Single	1	College/University or Above	4	Student	4	PHP 10,000 or less	1	Urban	2	NCR	Yes	1	2	2	2	4	2	4	2	1	1	3	2	3	2	4	3	Agree	3	2	4	2	4	4	2	2	1	4	2	4	3	2	3	2	3
50	3	Male	1	Married	2	College/University or Above	4	Professional/White Collar Worker	2	PHP 20,000 to 100,000	3	Rural	1	Region VI	No	2	2	1	2	5	3	4	2	2	1	2	1	3	2	4	1	Agree	3	2	3	2	3	4	2	2	1	4	2	4	3	2	3	2	3
40	2	Female	2	Single	1	College/University or Above	4	Professional/White Collar Worker	2	PHP 20,000 to 100,000	3	Urban	2	NCR	No	2	2	1	2	5	3	4	2	1	1	1	1	3	2	4	1	Agree	3	2	3	2	3	3	2	1	1	4	2	4	3	2	3	2	4
50	3	Male	1	Married	2	College/University or Above	4	Professional/White Collar Worker	2	PHP 100,000 or more	4	Urban	2	NCR	No	2	2	1	2	5	3	4	2	2	1	2	1	3	2	4	3	Agree	3	2	3	2	3	3	2	2	1	3	2	3	3	2	3	2	3
20	1	Male	1	Single	1	College/University or Above	4	Student	4	PHP 10,000 or less	1	Urban	2	Region IV-A	No	2	2	2	2	5	3	3	1	3	2	3	2	3	2	1	3	Agree	3	2	3	2	4	4	2	2	1	4	2	4	4	2	4	2	4
58	4	Female	2	Married	2	College/University or Above	4	Professional/White Collar Worker	2	PHP 20,000 to 100,000	3	Urban	2	Region X	No	2	2	2	2	5	3	2	1	2	1	2	1	3	2	4	1	Agree	3	2	3	2	3	3	2	2	1	3	2	3	3	2	3	2	4
21	1	Female	2	Single	1	College/University or Above	4	Student	4	PHP 10,000 or less	1	Urban	2	NCR	Yes	1	2	2	2	3	1	3	1	2	1	2	1	2	1	1	3	Disagree	2	1	3	2	3	2	1	3	2	3	2	3	3	2	3	2	3
73	5	Female	2	Married	2	College/University or Above	4	Professional/White Collar Worker	2	PHP 10,000 to 20,000	2	Urban	2	NCR	No	2	1	1	1	3	1	5	2	3	2	2	1	3	2	4	1	Disagree	2	1	2	1	2	3	2	3	2	3	2	3	3	2	3	2	3
72	5	Female	2	Married	2	College/University or Above	4	Professional/White Collar Worker	2	PHP 20,000 to 100,000	3	Urban	2	NCR	Yes	1	2	1	1	3	1	3	1	1	1	1	1	3	2	4	1	Strongly Disagree	1	1	2	1	2	4	2	3	2	4	2	3	3	2	3	2	3
65	5	Female	2	Single	1	College/University or Above	4	Self-employed	3	PHP 10,000 to 20,000	2	Urban	2	Region X	No	2	2	2	1	3	1	3	1	2	1	2	1	2	1	1	3	Disagree	2	1	2	1	3	3	2	3	2	3	2	3	3	2	3	2	3
69	5	Male	1	Single	1	College/University or Above	4	Professional/White Collar Worker	2	PHP 100,000 or more	4	Urban	2	NCR	Yes	1	2	1	2	3	1	2	1	2	1	3	2	3	2	4	1	Disagree	2	1	2	1	4	4	2	4	2	4	2	4	3	2	3	2	4
21	1	Male	1	Single	1	College/University or Above	4	Student	4	PHP 10,000 or less	1	Urban	2	NCR	Yes	1	2	2	2	3	1	2	1	2	1	2	1	2	1	1	3	Strongly Disagree	1	1	2	1	2	3	2	3	2	4	2	3	4	2	4	2	4
70	5	Female	2	Married	2	College/University or Above	4	Housewife/Retired/Unemployed/Other	5	PHP 20,000 to 100,000	3	Rural	1	Region IV-A	No	2	2	1	1	4	2	4	2	1	1	1	1	3	2	4	4	Disagree	2	1	2	1	3	4	2	3	2	4	2	4	4	2	4	2	4
53	4	Female	2	Married	2	College/University or Above	4	Professional/White Collar Worker	2	PHP 20,000 to 100,000	3	Urban	2	Region V	No	2	2	1	1	4	2	3	1	3	2	3	2	3	2	4	3	Disagree	2	1	1	1	3	4	2	3	2	3	2	3	3	2	3	2	3
72	5	Female	2	Single	1	College/University or Above	4	Housewife/Retired/Unemployed/Other	5	PHP 20,000 to 100,000	3	Urban	2	NCR	No	2	2	1	1	4	2	3	1	2	1	2	1	3	2	1	3	Disagree	2	1	2	1	2	3	2	3	2	4	2	3	3	2	3	2	4
68	5	Male	1	Married	2	College/University or Above	4	Housewife/Retired/Unemployed/Other	5	PHP 100,000 or more	4	Urban	2	NCR	Yes	1	2	1	1	4	2	3	1	2	1	2	1	3	2	4	4	Disagree	2	1	2	1	3	4	2	4	2	4	2	3	3	2	3	2	3
54	4	Female	2	Married	2	College/University or Above	4	Professional/White Collar Worker	2	PHP 20,000 to 100,000	3	Rural	1	Region XII	No	2	2	2	1	4	2	4	2	3	2	2	1	2	1	1	1	Disagree	2	1	2	1	2	3	2	3	2	3	2	3	3	2	3	2	4
77	5	Female	2	Married	2	College/University or Above	4	Housewife/Retired/Unemployed/Other	5	PHP 10,000 to 20,000	2	Urban	2	NCR	Yes	1	2	2	1	4	2	4	2	1	1	2	1	3	2	4	3	Disagree	2	1	2	1	2	4	2	3	2	4	2	2	3	2	3	2	4
48	3	Male	1	Single	1	College/University or Above	4	Professional/White Collar Worker	2	PHP 10,000 to 20,000	2	Rural	1	Region VI	No	2	2	1	2	4	2	3	1	3	2	3	2	3	2	1	2	Disagree	2	1	2	1	3	4	2	3	2	3	2	3	3	2	3	2	3
53	4	Female	2	Married	2	College/University or Above	4	Professional/White Collar Worker	2	PHP 10,000 to 20,000	2	Rural	1	Region VI	No	2	2	1	2	4	2	4	2	1	1	1	1	3	2	4	2	Disagree	2	1	2	1	2	4	2	4	2	4	2	4	3	2	4	2	4
20	1	Female	2	Single	1	College/University or Above	4	Student	4	PHP 10,000 or less	1	Urban	2	NCR	No	2	2	1	2	4	2	4	2	3	2	2	1	3	2	4	3	Disagree	2	1	2	1	3	4	2	3	2	4	2	4	3	2	3	2	4
64	5	Female	2	Married	2	College/University or Above	4	Professional/White Collar Worker	2	PHP 20,000 to 100,000	3	Urban	2	NCR	Yes	1	2	1	2	4	2	4	2	2	1	3	2	3	2	1	1	Disagree	2	1	2	1	3	4	2	3	2	4	2	4	3	2	3	2	3
72	5	Male	1	Married	2	College/University or Above	4	Professional/White Collar Worker	2	PHP 20,000 to 100,000	3	Urban	2	NCR	Yes	1	2	1	2	4	2	3	1	1	1	1	1	4	2	4	3	Disagree	2	1	2	1	4	4	2	4	2	4	2	4	3	2	3	2	4
63	5	Female	2	Married	2	College/University or Above	4	Self-employed	3	PHP 20,000 to 100,000	3	Urban	2	NCR	Yes	1	2	1	2	4	2	3	1	2	1	3	2	3	2	4	3	Disagree	2	1	2	1	3	3	2	3	2	3	2	3	3	2	3	2	3
70	5	Male	1	Married	2	College/University or Above	4	Self-employed	3	PHP 100,000 or more	4	Urban	2	NCR	Yes	1	2	1	2	4	2	4	2	3	2	3	2	3	2	1	3	Strongly Disagree	1	1	1	1	1	3	2	3	2	4	2	4	3	2	4	2	3
23	1	Female	2	Single	1	College/University or Above	4	Professional/White Collar Worker	2	PHP 10,000 or less	1	Rural	1	Region VI	No	2	2	2	2	4	2	4	2	3	2	3	2	3	2	1	1	Strongly Disagree	1	1	1	1	1	4	2	4	2	4	2	4	3	2	4	2	4
20	1	Female	2	Single	1	College/University or Above	4	Blue Collar Worker	1	PHP 10,000 or less	1	Urban	2	NCR	No	2	2	2	2	4	2	4	2	1	1	3	2	3	2	4	3	Strongly Disagree	1	1	2	1	2	4	2	3	2	4	2	4	3	2	3	2	4
26	1	Female	2	Single	1	College/University or Above	4	Student	4	PHP 10,000 or less	1	Urban	2	NCR	No	2	2	2	2	4	2	3	1	2	1	2	1	3	2	4	3	Disagree	2	1	2	1	2	4	2	4	2	4	2	4	3	2	3	2	4
21	1	Male	1	Single	1	College/University or Above	4	Self-employed	3	PHP 10,000 or less	1	Urban	2	Region IV-A	No	2	1	1	2	5	3	3	1	2	1	2	1	3	2	4	3	Disagree	2	1	2	1	2	3	2	3	2	3	2	4	3	2	3	2	4
43	3	Male	1	Single	1	College/University or Above	4	Professional/White Collar Worker	2	PHP 20,000 to 100,000	3	Urban	2	Region III	No	2	2	1	2	5	3	4	2	2	1	3	2	3	2	4	1	Strongly Disagree	1	1	1	1	2	4	2	3	2	4	2	4	4	2	3	2	4
69	5	Female	2	Married	2	College/University or Above	4	Self-employed	3	PHP 20,000 to 100,000	3	Urban	2	NCR	No	2	2	1	2	5	3	2	1	1	1	1	1	3	2	1	1	Disagree	2	1	2	1	3	4	2	3	2	3	2	3	3	2	3	2	3
69	5	Female	2	Married	2	College/University or Above	4	Self-employed	3	PHP 100,000 or more	4	Urban	2	Region III	No	2	2	1	2	5	3	3	1	1	1	2	1	4	2	1	1	Strongly Disagree	1	1	1	1	1	4	2	4	2	4	2	4	3	2	4	2	4
21	1	Female	2	Single	1	College/University or Above	4	Student	4	PHP 10,000 or less	1	Rural	1	Region VII	No	2	2	2	2	5	3	3	1	2	1	3	2	3	2	3	3	Disagree	2	1	1	1	1	4	2	3	2	4	2	4	3	2	3	2	4
29	1	Female	2	Single	1	College/University or Above	4	Professional/White Collar Worker	2	PHP 20,000 to 100,000	3	Rural	1	Region IX	No	2	2	2	2	5	3	3	1	2	1	3	2	3	2	1	1	Disagree	2	1	2	1	2	4	2	3	2	4	2	4	3	2	3	2	4
69	5	Female	2	Single	1	College/University or Above	4	Housewife/Retired/Unemployed/Other	5	PHP 10,000 to 20,000	2	Urban	2	NCR	No	2	2	2	2	5	3	2	1	2	1	1	1	3	2	4	1	Disagree	2	1	2	1	3	3	2	3	2	3	2	3	3	2	3	2	4
34	2	Male	1	Single	1	College/University or Above	4	Professional/White Collar Worker	2	PHP 20,000 to 100,000	3	Urban	2	NCR	No	2	2	2	2	5	3	5	2	3	2	3	2	3	2	1	4	Disagree	2	1	2	1	2	4	2	3	2	4	2	2	4	2	4	2	4
58	4	Female	2	Single	1	College/University or Above	4	Self-employed	3	PHP 20,000 to 100,000	3	Urban	2	NCR	No	2	2	2	2	5	3	2	1	2	1	2	1	3	2	4	2	Disagree	2	1	2	1	4	4	2	3	2	3	2	4	3	2	3	2	3
22	1	Female	2	Single	1	College/University or Above	4	Student	4	PHP 20,000 to 100,000	3	Urban	2	NCR	Yes	1	2	2	2	5	3	4	2	2	1	2	1	3	2	4	1	Disagree	2	1	2	1	2	4	2	4	2	4	2	4	3	2	4	2	4
22	1	Male	1	Single	1	College/University or Above	4	Student	4	PHP 20,000 to 100,000	3	Urban	2	Region IV-A	No	2	2	2	2	5	3	5	2	2	1	3	2	3	2	1	2	Disagree	2	1	2	1	2	4	2	3	2	4	2	4	3	2	3	2	3
52	4	Female	2	Married	2	College/University or Above	4	Self-employed	3	PHP 10,000 or less	1	Rural	1	Region VI	No	2	2	1	1	3	1	4	2	1	1	3	2	4	2	4	1	Disagree	2	1	4	2	4	4	2	3	2	4	2	4	3	2	4	2	3
60	4	Male	1	Married	2	College/University or Above	4	Housewife/Retired/Unemployed/Other	5	PHP 10,000 or less	1	Rural	1	Region III	No	2	2	1	1	3	1	3	1	2	1	2	1	2	1	1	3	Disagree	2	1	3	2	4	4	2	3	2	4	2	3	3	2	3	2	4
48	3	Male	1	Single	1	College/University or Above	4	Professional/White Collar Worker	2	PHP 20,000 to 100,000	3	Rural	1	Region IV-A	No	2	2	1	1	3	1	3	1	2	1	2	1	3	2	4	1	Disagree	2	1	4	2	4	4	2	3	2	4	2	4	3	2	3	2	4
55	4	Male	1	Married	2	College/University or Above	4	Housewife/Retired/Unemployed/Other	5	PHP 10,000 or less	1	Urban	2	NCR	Yes	1	2	1	1	3	1	4	2	1	1	1	1	3	2	4	1	Disagree	2	1	3	2	4	4	2	4	2	4	2	4	3	2	3	2	4
64	5	Female	2	Married	2	College/University or Above	4	Housewife/Retired/Unemployed/Other	5	PHP 10,000 to 20,000	2	Urban	2	Region III	No	2	2	1	1	3	1	3	1	2	1	2	1	2	1	1	3	Disagree	2	1	3	2	3	3	2	3	2	4	2	3	3	2	3	2	3
43	3	Female	2	Single	1	College/University or Above	4	Professional/White Collar Worker	2	PHP 20,000 to 100,000	3	Urban	2	NCR	Yes	1	2	1	1	3	1	3	1	2	1	2	1	3	2	1	3	Disagree	2	1	3	2	3	4	2	4	2	4	2	4	3	2	3	2	4
45	3	Female	2	Married	2	College/University or Above	4	Professional/White Collar Worker	2	PHP 20,000 to 100,000	3	Urban	2	Region III	No	2	2	1	1	3	1	3	1	2	1	2	1	2	1	1	3	Disagree	2	1	3	2	3	3	2	3	2	4	2	4	3	2	3	2	4
57	4	Female	2	Married	2	College/University or Above	4	Professional/White Collar Worker	2	PHP 20,000 to 100,000	3	Urban	2	NCR	No	2	2	1	1	3	1	2	1	1	1	1	1	3	2	4	1	Strongly Disagree	1	1	3	2	3	4	2	3	2	4	2	4	3	2	3	2	3
59	4	Female	2	Married	2	College/University or Above	4	Professional/White Collar Worker	2	PHP 20,000 to 100,000	3	Urban	2	NCR	Yes	1	2	1	1	3	1	4	2	2	1	2	1	3	2	4	1	Disagree	2	1	3	2	3	3	2	3	2	4	2	4	3	2	3	2	4
60	4	Male	1	Married	2	College/University or Above	4	Professional/White Collar Worker	2	PHP 20,000 to 100,000	3	Urban	2	NCR	No	2	2	1	1	3	1	4	2	1	1	1	1	3	2	4	3	Disagree	2	1	3	2	3	4	2	3	2	4	2	4	3	2	3	2	4
69	5	Female	2	Single	1	College/University or Above	4	Housewife/Retired/Unemployed/Other	5	PHP 20,000 to 100,000	3	Urban	2	NCR	Yes	1	2	1	1	3	1	3	1	1	1	1	1	3	2	4	1	Strongly Disagree	1	1	3	2	3	4	2	3	2	4	2	4	3	2	3	2	4
49	3	Female	2	Married	2	College/University or Above	4	Housewife/Retired/Unemployed/Other	5	PHP 20,000 to 100,000	3	Urban	2	Region IV-A	No	2	2	1	1	3	1	3	1	2	1	2	1	2	1	1	1	Disagree	2	1	4	2	4	4	2	4	2	4	2	4	3	2	3	2	4
76	5	Female	2	Married	2	College/University or Above	4	Housewife/Retired/Unemployed/Other	5	PHP 20,000 to 100,000	3	Urban	2	NCR	Yes	1	2	1	1	3	1	3	1	1	1	2	1	3	2	1	1	Disagree	2	1	3	2	4	3	2	3	2	3	2	4	3	2	3	2	4
56	4	Female	2	Single	1	College/University or Above	4	Professional/White Collar Worker	2	PHP 20,000 to 100,000	3	Urban	2	NCR	No	2	2	2	1	3	1	3	1	2	1	2	1	3	2	4	2	Disagree	2	1	3	2	3	3	2	3	2	4	2	4	3	2	3	2	3
75	5	Female	2	Single	1	College/University or Above	4	Housewife/Retired/Unemployed/Other	5	PHP 100,000 or more	4	Urban	2	NCR	No	2	2	2	1	3	1	4	2	2	1	2	1	3	2	4	3	Disagree	2	1	4	2	4	4	2	3	2	4	2	3	3	2	3	2	3
19	1	Female	2	Single	1	College/University or Above	4	Student	4	PHP 10,000 or less	1	Rural	1	Region III	No	2	2	1	2	3	1	4	2	1	1	3	2	4	2	4	1	Strongly Disagree	1	1	3	2	4	4	2	4	2	4	2	4	4	2	4	2	4
19	1	Male	1	Single	1	College/University or Above	4	Student	4	PHP 10,000 or less	1	Urban	2	NCR	No	2	2	1	2	3	1	3	1	1	1	2	1	3	2	4	3	Disagree	2	1	4	2	4	4	2	4	2	4	2	4	3	2	3	2	4
20	1	Male	1	Single	1	College/University or Above	4	Student	4	PHP 10,000 or less	1	Urban	2	Region IV-A	No	2	2	1	2	1	1	3	1	2	1	2	1	2	1	1	3	Disagree	2	1	3	2	3	4	2	3	2	4	2	4	4	2	4	2	4
21	1	Female	2	Single	1	College/University or Above	4	Student	4	PHP 10,000 or less	1	Urban	2	NCR	No	2	2	1	2	3	1	4	2	1	1	2	1	3	2	4	2	Disagree	2	1	4	2	4	3	2	3	2	4	2	4	4	2	3	2	3
25	1	Female	2	Single	1	College/University or Above	4	Student	4	PHP 10,000 or less	1	Urban	2	Region II	No	2	2	1	2	3	1	2	1	2	1	2	1	2	1	1	1	Strongly Disagree	1	1	3	2	3	4	2	3	2	3	2	3	3	2	3	2	4
34	2	Female	2	Married	2	College/University or Above	4	Professional/White Collar Worker	2	PHP 10,000 to 20,000	2	Urban	2	Region VII	No	2	2	1	2	3	1	4	2	1	1	2	1	3	2	4	1	Strongly Disagree	1	1	3	2	4	4	2	3	2	4	2	4	3	2	3	2	4
20	1	Female	2	Single	1	College/University or Above	4	Student	4	PHP 10,000 to 20,000	2	Urban	2	NCR	No	2	2	1	2	3	1	4	2	2	1	2	1	2	1	1	3	Strongly Disagree	1	1	4	2	4	4	2	4	2	4	2	4	3	2	3	2	4
65	5	Female	2	Single	1	College/University or Above	4	Housewife/Retired/Unemployed/Other	5	PHP 10,000 to 20,000	2	Urban	2	NCR	No	2	2	1	2	3	1	4	2	1	1	1	1	3	2	4	2	Strongly Disagree	1	1	3	2	4	4	2	4	2	4	2	4	3	2	3	2	4
63	5	Male	1	Married	2	College/University or Above	4	Housewife/Retired/Unemployed/Other	5	PHP 10,000 to 20,000	2	Urban	2	NCR	Yes	1	2	1	2	3	1	5	2	2	1	3	2	4	2	1	2	Disagree	2	1	4	2	4	4	2	3	2	4	2	4	4	2	4	2	4
24	1	Male	1	Single	1	College/University or Above	4	Professional/White Collar Worker	2	PHP 20,000 to 100,000	3	Urban	2	Region IV-A	No	2	2	1	2	3	1	3	1	1	1	2	1	3	2	1	1	Strongly Disagree	1	1	3	2	4	4	2	4	2	4	2	4	3	2	3	2	3
28	1	Male	1	Single	1	College/University or Above	4	Professional/White Collar Worker	2	PHP 20,000 to 100,000	3	Urban	2	Region III	No	2	2	1	2	3	1	4	2	1	1	2	1	3	2	4	1	Disagree	2	1	4	2	4	4	2	4	2	4	2	4	4	2	4	2	4
42	3	Female	2	Single	1	College/University or Above	4	Professional/White Collar Worker	2	PHP 20,000 to 100,000	3	Urban	2	NCR	No	2	2	1	2	3	1	4	2	3	2	2	1	3	2	1	2	Disagree	2	1	3	2	3	4	2	3	2	4	2	3	3	2	3	2	4
45	3	Female	2	Single	1	College/University or Above	4	Professional/White Collar Worker	2	PHP 20,000 to 100,000	3	Urban	2	Region IV-B	No	2	2	1	2	3	1	4	2	2	1	2	1	2	1	1	2	Disagree	2	1	3	2	3	3	2	3	2	4	2	4	3	2	3	2	3
31	2	Female	2	Married	2	College/University or Above	4	Professional/White Collar Worker	2	PHP 20,000 to 100,000	3	Urban	2	Region IV-A	No	2	2	1	2	3	1	4	2	3	2	4	2	3	2	1	4	Disagree	2	1	3	2	4	4	2	3	2	4	2	4	3	2	3	2	4
56	4	Male	1	Married	2	College/University or Above	4	Professional/White Collar Worker	2	PHP 20,000 to 100,000	3	Urban	2	NCR	No	2	2	1	2	3	1	4	2	2	1	2	1	3	2	4	2	Disagree	2	1	3	2	3	4	2	4	2	4	2	4	3	2	4	2	4
50	3	Female	2	Married	2	College/University or Above	4	Self-employed	3	PHP 20,000 to 100,000	3	Urban	2	NCR	No	2	2	1	2	3	1	3	1	1	1	1	1	3	2	4	1	Disagree	2	1	3	2	3	4	2	4	2	4	2	4	3	2	3	2	4
20	1	Female	2	Single	1	College/University or Above	4	Student	4	PHP 20,000 to 100,000	3	Urban	2	NCR	Yes	1	2	1	2	3	1	3	1	2	1	2	1	2	1	1	3	Disagree	2	1	3	2	3	3	2	4	2	4	2	4	3	2	3	2	4
71	5	Female	2	Married	2	College/University or Above	4	Housewife/Retired/Unemployed/Other	5	PHP 20,000 to 100,000	3	Urban	2	NCR	Yes	1	2	1	2	3	1	4	2	2	1	1	1	3	2	4	3	Disagree	2	1	3	2	3	4	2	3	2	4	2	4	3	2	3	2	3
30	1	Male	1	Married	2	College/University or Above	4	Self-employed	3	PHP 10,000 or less	1	Rural	1	Region X	No	2	2	2	2	3	1	3	1	1	1	1	1	1	1	1	1	Strongly Disagree	1	1	3	2	3	3	2	3	2	3	2	4	3	2	3	2	4
31	2	Female	2	Single	1	College/University or Above	4	Professional/White Collar Worker	2	PHP 20,000 to 100,000	3	Rural	1	NCR	Yes	1	2	2	2	3	1	3	1	1	1	1	1	3	2	4	1	Disagree	2	1	4	2	3	3	2	3	2	4	2	4	3	2	3	2	4
20	1	Female	2	Single	1	College/University or Above	4	Student	4	PHP 10,000 or less	1	Urban	2	NCR	Yes	1	2	2	2	3	1	4	2	2	1	3	2	3	2	1	1	Strongly Disagree	1	1	3	2	3	3	2	3	2	4	2	4	4	2	4	2	4
26	1	Female	2	Single	1	College/University or Above	4	Professional/White Collar Worker	2	PHP 10,000 to 20,000	2	Urban	2	NCR	Yes	1	2	2	2	3	1	4	2	1	1	3	2	3	2	4	1	Disagree	2	1	4	2	4	4	2	4	2	4	2	4	3	2	3	2	4
72	5	Female	2	Married	2	College/University or Above	4	Housewife/Retired/Unemployed/Other	5	PHP 20,000 to 100,000	3	Urban	2	Region IV-A	No	2	1	1	1	4	2	3	1	1	1	2	1	3	2	4	1	Disagree	2	1	3	2	4	4	2	4	2	4	2	4	3	2	3	2	4
59	4	Male	1	Married	2	College/University or Above	4	Professional/White Collar Worker	2	PHP 100,000 or more	4	Urban	2	Region IV-A	No	2	1	1	1	4	2	5	2	2	1	2	1	4	2	4	2	Disagree	2	1	3	2	4	4	2	3	2	3	2	4	4	2	4	2	3
59	4	Female	2	Single	1	College/University or Above	4	Professional/White Collar Worker	2	PHP 20,000 to 100,000	3	Rural	1	Region IV-B	No	2	2	1	1	4	2	3	1	1	1	1	1	3	2	1	3	Disagree	2	1	3	2	4	4	2	4	2	4	2	4	3	2	3	2	4
47	3	Male	1	Single	1	College/University or Above	4	Professional/White Collar Worker	2	PHP 100,000 or more	4	Rural	1	Region IV-A	No	2	2	1	1	4	2	3	1	2	1	2	1	3	2	1	1	Strongly Disagree	1	1	4	2	4	4	2	3	2	4	2	4	3	2	3	2	4
63	5	Male	1	Married	2	College/University or Above	4	Self-employed	3	PHP 10,000 to 20,000	2	Urban	2	Region IV-A	No	2	2	1	1	4	2	3	1	1	1	2	1	3	2	4	4	Disagree	2	1	3	2	3	4	2	4	2	4	2	4	3	2	3	2	4
70	5	Male	1	Married	2	College/University or Above	4	Self-employed	3	PHP 10,000 to 20,000	2	Urban	2	NCR	No	2	2	1	1	4	2	5	2	2	1	2	1	3	2	4	2	Disagree	2	1	4	2	4	4	2	3	2	4	2	4	3	2	3	2	3
71	5	Female	2	Single	1	College/University or Above	4	Professional/White Collar Worker	2	PHP 20,000 to 100,000	3	Urban	2	Region X	No	2	2	1	1	4	2	5	2	2	1	3	2	4	2	4	3	Disagree	2	1	3	2	3	3	2	3	2	3	2	3	3	2	3	2	3
49	3	Female	2	Married	2	College/University or Above	4	Professional/White Collar Worker	2	PHP 20,000 to 100,000	3	Urban	2	Region VII	No	2	2	1	1	4	2	2	1	1	1	2	1	2	1	1	1	Disagree	2	1	3	2	3	4	2	3	2	4	2	4	3	2	3	2	4
54	4	Female	2	Married	2	College/University or Above	4	Professional/White Collar Worker	2	PHP 20,000 to 100,000	3	Urban	2	Region XII	No	2	2	1	1	4	2	4	2	2	1	3	2	3	2	1	1	Disagree	2	1	3	2	3	4	2	3	2	4	2	4	3	2	3	2	4
65	5	Female	2	Single	1	College/University or Above	4	Self-employed	3	PHP 20,000 to 100,000	3	Urban	2	NCR	Yes	1	2	1	1	4	2	3	1	1	1	2	1	3	2	4	1	Disagree	2	1	4	2	4	4	2	3	2	4	2	4	3	2	3	2	4
86	5	Female	2	Single	1	College/University or Above	4	Housewife/Retired/Unemployed/Other	5	PHP 20,000 to 100,000	3	Urban	2	NCR	No	2	2	1	1	4	2	4	2	2	1	2	1	3	2	4	3	Disagree	2	1	3	2	3	4	2	3	2	3	2	3	3	2	3	2	3
66	5	Female	2	Married	2	College/University or Above	4	Housewife/Retired/Unemployed/Other	5	PHP 20,000 to 100,000	3	Urban	2	Region VIII	No	2	2	1	1	4	2	4	2	2	1	2	1	3	2	4	1	Disagree	2	1	3	2	3	3	2	3	2	3	2	3	3	2	3	2	4
60	4	Female	2	Married	2	College/University or Above	4	Professional/White Collar Worker	2	PHP 100,000 or more	4	Urban	2	CAR	No	2	2	1	1	4	2	4	2	2	1	2	1	3	2	4	1	Disagree	2	1	3	2	3	4	2	4	2	4	2	4	3	2	3	2	3
81	5	Male	1	Married	2	College/University or Above	4	Professional/White Collar Worker	2	PHP 100,000 or more	4	Urban	2	NCR	Yes	1	2	1	1	4	2	4	2	3	2	3	2	3	2	1	3	Disagree	2	1	3	2	3	4	2	3	2	4	2	3	3	2	3	2	4
53	4	Female	2	Married	2	College/University or Above	4	Professional/White Collar Worker	2	PHP 20,000 to 100,000	3	Rural	1	Region I	No	2	2	2	1	4	2	3	1	1	1	3	2	4	2	4	1	Disagree	2	1	4	2	4	4	2	4	2	4	2	4	4	2	4	2	3
67	5	Male	1	Married	2	College/University or Above	4	Self-employed	3	PHP 10,000 or less	1	Urban	2	Region IV-A	No	2	2	2	1	4	2	4	2	2	1	2	1	4	2	1	4	Disagree	2	1	4	2	4	4	2	4	2	4	2	4	4	2	4	2	3
62	5	Male	1	Married	2	College/University or Above	4	Professional/White Collar Worker	2	PHP 20,000 to 100,000	3	Urban	2	Region IV-B	No	2	2	2	1	4	2	3	1	2	1	3	2	4	2	1	2	Disagree	2	1	3	2	3	4	2	4	2	4	2	4	3	2	3	2	4
25	1	Male	1	Single	1	College/University or Above	4	Housewife/Retired/Unemployed/Other	5	PHP 10,000 or less	1	Urban	2	NCR	No	2	1	1	2	4	2	4	2	1	1	3	2	3	2	1	2	Disagree	2	1	4	2	4	4	2	4	2	4	2	4	4	2	4	2	4
23	1	Female	2	Single	1	College/University or Above	4	Professional/White Collar Worker	2	PHP 10,000 or less	1	Rural	1	Region VI	No	2	2	1	2	4	2	3	1	2	1	3	2	3	2	1	3	Disagree	2	1	4	2	4	3	2	3	2	4	2	4	3	2	3	2	4
18	1	Female	2	Single	1	College/University or Above	4	Student	4	PHP 10,000 or less	1	Rural	1	Region III	No	2	2	1	2	4	2	3	1	2	1	2	1	2	1	1	2	Strongly Disagree	1	1	3	2	3	4	2	3	2	3	2	4	3	2	3	2	4
20	1	Female	2	Single	1	College/University or Above	4	Student	4	PHP 10,000 or less	1	Rural	1	Region I	No	2	2	1	2	4	2	3	1	2	1	2	1	2	1	1	2	Disagree	2	1	3	2	4	4	2	3	2	4	2	4	3	2	3	2	4
20	1	Female	2	Single	1	College/University or Above	4	Student	4	PHP 10,000 or less	1	Rural	1	Region IV-A	No	2	2	1	2	4	2	4	2	2	1	3	2	4	2	4	3	Disagree	2	1	3	2	3	4	2	3	2	4	2	4	3	2	3	2	4
20	1	Female	2	Single	1	College/University or Above	4	Student	4	PHP 10,000 or less	1	Rural	1	Region III	No	2	2	1	2	4	2	4	2	2	1	3	2	3	2	1	4	Disagree	2	1	3	2	3	4	2	3	2	4	2	4	3	2	3	2	3
27	1	Female	2	Single	1	College/University or Above	4	Professional/White Collar Worker	2	PHP 10,000 to 20,000	2	Rural	1	Region VI	No	2	2	1	2	4	2	4	2	2	1	2	1	3	2	4	1	Disagree	2	1	3	2	4	4	2	3	2	3	2	4	3	2	3	2	3
28	1	Male	1	Single	1	College/University or Above	4	Professional/White Collar Worker	2	PHP 10,000 to 20,000	2	Rural	1	Region VI	No	2	2	1	2	4	2	4	2	3	2	3	2	3	2	1	3	Disagree	2	1	3	2	3	4	2	4	2	4	2	4	3	2	3	2	3
50	3	Female	2	Single	1	College/University or Above	4	Professional/White Collar Worker	2	PHP 10,000 to 20,000	2	Rural	1	Region VI	No	2	2	1	2	4	2	4	2	2	1	2	1	3	2	4	1	Disagree	2	1	3	2	3	4	2	3	2	4	2	4	3	2	3	2	4
24	1	Female	2	Single	1	College/University or Above	4	Blue Collar Worker	1	PHP 20,000 to 100,000	3	Rural	1	Region VI	No	2	2	1	2	4	2	4	2	2	1	2	1	3	2	1	1	Strongly Disagree	1	1	4	2	4	4	2	3	2	4	2	4	3	2	3	2	4
54	4	Male	1	Married	2	College/University or Above	4	Professional/White Collar Worker	2	PHP 20,000 to 100,000	3	Rural	1	Region X	No	2	2	1	2	4	2	5	2	1	1	2	1	3	2	4	1	Disagree	2	1	3	2	3	4	2	3	2	3	2	3	3	2	3	2	3
61	5	Male	1	Single	1	College/University or Above	4	Self-employed	3	PHP 20,000 to 100,000	3	Rural	1	Region IV-A	No	2	2	1	2	4	2	3	1	2	1	2	1	2	1	4	1	Disagree	2	1	3	2	3	4	2	4	2	4	2	4	3	2	3	2	4
68	5	Female	2	Single	1	College/University or Above	4	Self-employed	3	PHP 100,000 or more	4	Rural	1	Region IV-A	No	2	2	1	2	4	2	3	1	2	1	2	1	2	1	1	3	Disagree	2	1	3	2	3	4	2	3	2	3	2	3	3	2	3	2	4
20	1	Female	2	Single	1	College/University or Above	4	Student	4	PHP 100,000 or more	4	Rural	1	Region V	No	2	2	1	2	4	2	4	2	1	1	1	1	4	2	4	2	Disagree	2	1	4	2	4	4	2	3	2	4	2	4	3	2	3	2	4
18	1	Female	2	Single	1	College/University or Above	4	Student	4	PHP 10,000 or less	1	Urban	2	NCR	Yes	1	2	1	2	4	2	3	1	1	1	2	1	3	2	4	2	Disagree	2	1	3	2	3	4	2	3	2	3	2	4	3	2	3	2	4
19	1	Female	2	Single	1	College/University or Above	4	Student	4	PHP 10,000 or less	1	Urban	2	NCR	No	2	2	1	2	4	2	3	1	2	1	3	2	3	2	1	1	Disagree	2	1	3	2	3	4	2	3	2	4	2	4	3	2	3	2	4
19	1	Female	2	Single	1	College/University or Above	4	Student	4	PHP 10,000 or less	1	Urban	2	Region IV-A	No	2	2	1	2	4	2	4	2	2	1	3	2	3	2	4	2	Disagree	2	1	3	2	4	4	2	3	2	4	2	4	3	2	3	2	3
20	1	Male	1	Single	1	College/University or Above	4	Student	4	PHP 10,000 or less	1	Urban	2	Region IV-A	No	2	2	1	2	4	2	4	2	2	1	2	1	3	2	1	2	Disagree	2	1	4	2	4	4	2	3	2	4	2	4	3	2	3	2	4
20	1	Female	2	Single	1	College/University or Above	4	Student	4	PHP 10,000 or less	1	Urban	2	Region III	No	2	2	1	2	4	2	4	2	1	1	3	2	3	2	1	1	Disagree	2	1	4	2	4	4	2	3	2	4	2	4	3	2	3	2	4
21	1	Male	1	Single	1	College/University or Above	4	Student	4	PHP 10,000 or less	1	Urban	2	Region III	No	2	2	1	2	4	2	3	1	1	1	1	1	3	2	1	4	Disagree	2	1	4	2	4	4	2	4	2	4	2	4	4	2	4	2	4
21	1	Female	2	Single	1	College/University or Above	4	Student	4	PHP 10,000 or less	1	Urban	2	Region IV-A	No	2	2	1	2	4	2	4	2	1	1	3	2	4	2	4	2	Disagree	2	1	3	2	4	4	2	3	2	4	2	4	4	2	4	2	3
21	1	Female	2	Single	1	College/University or Above	4	Student	4	PHP 10,000 or less	1	Urban	2	NCR	No	2	2	1	2	4	2	3	1	1	1	2	1	4	2	4	1	Disagree	2	1	4	2	4	4	2	4	2	4	2	4	3	2	3	2	3
22	1	Female	2	Single	1	College/University or Above	4	Student	4	PHP 10,000 or less	1	Urban	2	Region V	No	2	2	1	2	4	2	4	2	2	1	2	1	4	2	4	3	Disagree	2	1	3	2	4	4	2	3	2	4	2	4	4	2	4	2	3
23	1	Male	1	Single	1	College/University or Above	4	Blue Collar Worker	1	PHP 10,000 to 20,000	2	Urban	2	NCR	No	2	2	1	2	4	2	3	1	2	1	3	2	3	2	4	3	Disagree	2	1	3	2	3	4	2	3	2	4	2	4	3	2	3	2	4
34	2	Female	2	Single	1	College/University or Above	4	Professional/White Collar Worker	2	PHP 10,000 to 20,000	2	Urban	2	Region VI	No	2	2	1	2	4	2	4	2	1	1	2	1	4	2	1	3	Disagree	2	1	3	2	4	4	2	3	2	3	2	4	3	2	3	2	4
29	1	Female	2	Married	2	College/University or Above	4	Professional/White Collar Worker	2	PHP 10,000 to 20,000	2	Urban	2	Region VII	No	2	2	1	2	4	2	3	1	2	1	2	1	2	1	1	3	Strongly Disagree	1	1	4	2	4	4	2	4	2	4	2	4	3	2	3	2	4
37	2	Female	2	Married	2	College/University or Above	4	Professional/White Collar Worker	2	PHP 10,000 to 20,000	2	Urban	2	Region VII	No	2	2	1	2	4	2	3	1	2	1	3	2	3	2	3	1	Strongly Disagree	1	1	4	2	4	4	2	3	2	4	2	4	3	2	3	2	4
49	3	Female	2	Married	2	College/University or Above	4	Housewife/Retired/Unemployed/Other	5	PHP 10,000 to 20,000	2	Urban	2	NCR	Yes	1	2	1	2	4	2	4	2	1	1	2	1	3	2	1	1	Disagree	2	1	3	2	4	4	2	3	2	3	2	4	3	2	3	2	4
55	4	Female	2	Married	2	College/University or Above	4	Housewife/Retired/Unemployed/Other	5	PHP 10,000 to 20,000	2	Urban	2	Region IV-A	No	2	2	1	2	4	2	3	1	2	1	2	1	2	1	1	3	Disagree	2	1	3	2	3	3	2	3	2	4	2	4	3	2	3	2	4
23	1	Female	2	Single	1	College/University or Above	4	Professional/White Collar Worker	2	PHP 20,000 to 100,000	3	Urban	2	Region IV-A	No	2	2	1	2	4	2	4	2	1	1	3	2	3	2	1	2	Disagree	2	1	4	2	4	3	2	3	2	4	2	4	3	2	3	2	4
24	1	Male	1	Single	1	College/University or Above	4	Professional/White Collar Worker	2	PHP 20,000 to 100,000	3	Urban	2	NCR	No	2	2	1	2	4	2	4	2	2	1	2	1	3	2	1	2	Disagree	2	1	4	2	4	4	2	3	2	4	2	4	3	2	3	2	4
25	1	Female	2	Single	1	College/University or Above	4	Professional/White Collar Worker	2	PHP 20,000 to 100,000	3	Urban	2	NCR	Yes	1	2	1	2	4	2	4	2	2	1	3	2	3	2	1	3	Strongly Disagree	1	1	3	2	3	4	2	4	2	4	2	4	3	2	3	2	4
25	1	Female	2	Single	1	College/University or Above	4	Professional/White Collar Worker	2	PHP 20,000 to 100,000	3	Urban	2	Region IV-A	No	2	2	1	2	4	2	3	1	1	1	1	1	3	2	4	1	Disagree	2	1	3	2	4	4	2	3	2	4	2	4	3	2	3	2	4
27	1	Female	2	Single	1	College/University or Above	4	Professional/White Collar Worker	2	PHP 20,000 to 100,000	3	Urban	2	Region VII	No	2	2	1	2	4	2	3	1	2	1	2	1	3	2	1	2	Disagree	2	1	3	2	4	4	2	3	2	4	2	4	3	2	3	2	4
31	2	Female	2	Single	1	College/University or Above	4	Professional/White Collar Worker	2	PHP 20,000 to 100,000	3	Urban	2	NCR	Yes	1	2	1	2	4	2	4	2	2	1	3	2	3	2	1	3	Disagree	2	1	4	2	4	4	2	4	2	4	2	4	3	2	3	2	4
33	2	Female	2	Single	1	College/University or Above	4	Professional/White Collar Worker	2	PHP 20,000 to 100,000	3	Urban	2	NCR	No	2	2	1	2	4	2	4	2	3	2	3	2	3	2	4	3	Disagree	2	1	3	2	3	4	2	3	2	4	2	4	3	2	3	2	4
38	2	Male	1	Single	1	College/University or Above	4	Professional/White Collar Worker	2	PHP 20,000 to 100,000	3	Urban	2	Region IX	No	2	2	1	2	4	2	3	1	2	1	3	2	3	2	1	1	Strongly Disagree	1	1	3	2	3	3	2	3	2	3	2	4	3	2	3	2	4
40	2	Female	2	Single	1	College/University or Above	4	Professional/White Collar Worker	2	PHP 20,000 to 100,000	3	Urban	2	Region XII	No	2	2	1	2	4	2	3	1	3	2	3	2	3	2	1	3	Strongly Disagree	1	1	4	2	4	4	2	3	2	4	2	4	3	2	3	2	4
56	4	Female	2	Single	1	College/University or Above	4	Professional/White Collar Worker	2	PHP 20,000 to 100,000	3	Urban	2	NCR	No	2	2	1	2	4	2	3	1	1	1	2	1	3	2	4	1	Disagree	2	1	3	2	4	4	2	3	2	4	2	4	3	2	3	2	3
64	5	Female	2	Single	1	College/University or Above	4	Professional/White Collar Worker	2	PHP 20,000 to 100,000	3	Urban	2	NCR	No	2	2	1	2	4	2	3	1	1	1	2	1	3	2	4	1	Strongly Disagree	1	1	3	2	3	4	2	3	2	3	2	3	3	2	3	2	4
29	1	Female	2	Married	2	College/University or Above	4	Professional/White Collar Worker	2	PHP 20,000 to 100,000	3	Urban	2	NCR	Yes	1	2	1	2	4	2	4	2	3	2	3	2	3	2	1	1	Strongly Disagree	1	1	3	2	3	3	2	3	2	3	2	3	3	2	3	2	3
38	2	Female	2	Married	2	College/University or Above	4	Professional/White Collar Worker	2	PHP 20,000 to 100,000	3	Urban	2		No	2	2	1	2	4	2	4	2	1	1	2	1	3	2	4	1	Strongly Disagree	1	1	3	2	3	4	2	3	2	4	2	4	3	2	3	2	3
41	3	Female	2	Married	2	College/University or Above	4	Professional/White Collar Worker	2	PHP 20,000 to 100,000	3	Urban	2	Region VII	No	2	2	1	2	4	2	4	2	2	1	2	1	3	2	4	2	Disagree	2	1	3	2	3	3	2	3	2	4	2	4	3	2	3	2	3
45	3	Male	1	Married	2	College/University or Above	4	Professional/White Collar Worker	2	PHP 20,000 to 100,000	3	Urban	2	Region X	No	2	2	1	2	4	2	5	2	3	2	3	2	3	2	1	1	Disagree	2	1	3	2	3	3	2	3	2	3	2	3	3	2	3	2	4
47	3	Male	1	Married	2	College/University or Above	4	Professional/White Collar Worker	2	PHP 20,000 to 100,000	3	Urban	2	Region VI	No	2	2	1	2	4	2	4	2	1	1	2	1	3	2	1	1	Disagree	2	1	4	2	4	4	2	3	2	4	2	4	3	2	3	2	4
47	3	Male	1	Married	2	College/University or Above	4	Professional/White Collar Worker	2	PHP 20,000 to 100,000	3	Urban	2	NCR	No	2	2	1	2	4	2	4	2	2	1	2	1	2	1	1	1	Disagree	2	1	4	2	4	4	2	4	2	4	2	4	3	2	3	2	4
53	4	Female	2	Married	2	College/University or Above	4	Professional/White Collar Worker	2	PHP 20,000 to 100,000	3	Urban	2	NCR	Yes	1	2	1	2	4	2	4	2	2	1	3	2	3	2	1	3	Disagree	2	1	4	2	4	4	2	4	2	4	2	4	4	2	4	2	4
56	4	Female	2	Married	2	College/University or Above	4	Professional/White Collar Worker	2	PHP 20,000 to 100,000	3	Urban	2	NCR	No	2	2	1	2	4	2	5	2	1	1	2	1	4	2	4	2	Disagree	2	1	3	2	2	4	2	4	2	4	2	4	4	2	4	2	4
56	4	Female	2	Married	2	College/University or Above	4	Professional/White Collar Worker	2	PHP 20,000 to 100,000	3	Urban	2	NCR	Yes	1	2	1	2	4	2	4	2	2	1	2	1	3	2	4	1	Strongly Disagree	1	1	3	2	3	4	2	4	2	4	2	4	3	2	3	2	4
62	5	Female	2	Married	2	College/University or Above	4	Professional/White Collar Worker	2	PHP 20,000 to 100,000	3	Urban	2	NCR	No	2	2	1	2	4	2	4	2	1	1	2	1	3	2	4	1	Strongly Disagree	1	1	4	2	4	4	2	3	2	4	2	4	3	2	3	2	4
53	4	Female	2	Married	2	College/University or Above	4	Self-employed	3	PHP 20,000 to 100,000	3	Urban	2	NCR	No	2	2	1	2	4	2	4	2	2	1	2	1	3	2	4	1	Strongly Disagree	1	1	4	2	4	4	2	3	2	4	2	4	3	2	3	2	3
19	1	Female	2	Single	1	College/University or Above	4	Student	4	PHP 20,000 to 100,000	3	Urban	2	NCR	No	2	2	1	2	4	2	3	1	1	1	2	1	3	2	1	3	Disagree	2	1	4	2	4	4	2	4	2	4	2	4	3	2	3	2	4
21	1	Male	1	Single	1	College/University or Above	4	Student	4	PHP 20,000 to 100,000	3	Urban	2	NCR	Yes	1	2	1	2	4	2	4	2	2	1	2	1	3	2	1	3	Disagree	2	1	4	2	4	4	2	4	2	4	2	4	3	2	3	2	3
65	5	Male	1	Married	2	College/University or Above	4	Housewife/Retired/Unemployed/Other	5	PHP 20,000 to 100,000	3	Urban	2	NCR	Yes	1	2	1	2	4	2	4	2	2	1	1	1	3	2	4	1	Disagree	2	1	4	2	4	4	2	4	2	4	2	4	3	2	3	2	4
78	5	Male	1	Married	2	College/University or Above	4	Housewife/Retired/Unemployed/Other	5	PHP 20,000 to 100,000	3	Urban	2	NCR	No	2	2	1	2	4	2	2	1	2	1	2	1	3	2	4	1	Disagree	2	1	3	2	3	4	2	4	2	4	2	3	3	2	3	2	4
67	5	Female	2	Single	1	College/University or Above	4	Professional/White Collar Worker	2	PHP 100,000 or more	4	Urban	2	NCR	No	2	2	1	2	4	2	3	1	1	1	1	1	4	2	4	1	Disagree	2	1	4	2	4	4	2	4	2	4	2	4	3	2	3	2	4
41	3	Female	2	Married	2	College/University or Above	4	Professional/White Collar Worker	2	PHP 100,000 or more	4	Urban	2	NCR	Yes	1	2	1	2	4	2	3	1	1	1	2	1	2	1	4	2	Disagree	2	1	3	2	4	4	2	3	2	4	2	4	3	2	3	2	4
56	4	Male	1	Married	2	College/University or Above	4	Professional/White Collar Worker	2	PHP 100,000 or more	4	Urban	2	NCR	Yes	1	2	1	2	4	2	4	2	2	1	2	1	4	2	4	1	Disagree	2	1	4	2	4	4	2	3	2	4	2	4	3	2	3	2	3
64	5	Male	1	Married	2	College/University or Above	4	Professional/White Collar Worker	2	PHP 100,000 or more	4	Urban	2	NCR	Yes	1	2	1	2	4	2	3	1	2	1	2	1	2	1	1	2	Disagree	2	1	3	2	3	3	2	3	2	3	2	3	3	2	3	2	4
57	4	Male	1	Married	2	College/University or Above	4	Self-employed	3	PHP 100,000 or more	4	Urban	2	Region XI	No	2	2	1	2	4	2	4	2	3	2	3	2	3	2	1	2	Disagree	2	1	3	2	3	3	2	3	2	3	2	3	3	2	3	2	3
46	3	Female	2	Married	2	College/University or Above	4	Housewife/Retired/Unemployed/Other	5	PHP 100,000 or more	4	Urban	2	NCR	Yes	1	2	1	2	4	2	3	1	2	1	3	2	3	2	4	3	Disagree	2	1	4	2	4	4	2	3	2	4	2	4	3	2	3	2	4
19	1	Male	1	Single	1	College/University or Above	4	Student	4	PHP 10,000 or less	1	Rural	1	Region III	No	2	2	2	2	4	2	3	1	2	1	2	1	2	1	1	3	Disagree	2	1	4	2	4	4	2	4	2	4	2	4	4	2	4	2	4
20	1	Male	1	Single	1	College/University or Above	4	Student	4	PHP 10,000 or less	1	Rural	1	Region I	No	2	2	2	2	4	2	3	1	2	1	2	1	3	2	4	2	Disagree	2	1	4	2	3	4	2	3	2	4	2	4	4	2	4	2	4
21	1	Male	1	Single	1	College/University or Above	4	Student	4	PHP 10,000 or less	1	Rural	1	Region II	No	2	2	2	2	4	2	4	2	2	1	3	2	3	2	1	2	Disagree	2	1	3	2	3	4	2	3	2	4	2	4	3	2	3	2	3
21	1	Male	1	Single	1	College/University or Above	4	Student	4	PHP 10,000 or less	1	Rural	1	Region IV-A	No	2	2	2	2	4	2	4	2	1	1	3	2	4	2	1	3	Disagree	2	1	3	2	3	4	2	4	2	4	2	4	4	2	4	2	4
30	1	Male	1	Single	1	College/University or Above	4	Professional/White Collar Worker	2	PHP 10,000 to 20,000	2	Rural	1	Region VI	No	2	2	2	2	4	2	3	1	3	2	3	2	4	2	4	4	Strongly Disagree	1	1	3	2	4	4	2	4	2	4	2	4	3	2	3	2	4
35	2	Female	2	Married	2	College/University or Above	4	Housewife/Retired/Unemployed/Other	5	PHP 10,000 to 20,000	2	Rural	1	Region IV-A	No	2	2	2	2	4	2	4	2	3	2	2	1	3	2	4	1	Disagree	2	1	3	2	3	3	2	3	2	4	2	4	3	2	3	2	3
29	1	Male	1	Single	1	College/University or Above	4	Professional/White Collar Worker	2	PHP 20,000 to 100,000	3	Rural	1	Region IV-A	No	2	2	2	2	4	2	2	1	2	1	3	2	2	1	3	1	Disagree	2	1	4	2	4	4	2	3	2	4	2	4	3	2	3	2	4
32	2	Female	2	Single	1	College/University or Above	4	Professional/White Collar Worker	2	PHP 20,000 to 100,000	3	Rural	1	NCR	No	2	2	2	2	4	2	4	2	2	1	2	1	3	2	4	1	Strongly Disagree	1	1	3	2	3	4	2	3	2	3	2	3	3	2	3	2	4
41	3	Female	2	Married	2	College/University or Above	4	Professional/White Collar Worker	2	PHP 20,000 to 100,000	3	Rural	1	Region IV-A	No	2	2	2	2	4	2	3	1	2	1	2	1	3	2	4	3	Disagree	2	1	3	2	3	3	2	3	2	3	2	3	3	2	3	2	3
43	3	Male	1	Married	2	College/University or Above	4	Professional/White Collar Worker	2	PHP 20,000 to 100,000	3	Rural	1	Region VII	No	2	2	2	2	4	2	4	2	1	1	3	2	3	2	3	4	Disagree	2	1	3	2	3	4	2	3	2	3	2	3	3	2	3	2	3
21	1	Female	2	Single	1	College/University or Above	4	Blue Collar Worker	1	PHP 10,000 or less	1	Urban	2	Region IV-A	No	2	2	2	2	4	2	3	1	2	1	2	1	4	2	4	1	Disagree	2	1	3	2	3	4	2	4	2	4	2	4	4	2	4	2	4
24	1	Male	1	Single	1	College/University or Above	4	Professional/White Collar Worker	2	PHP 10,000 or less	1	Urban	2	Region III	No	2	2	2	2	4	2	4	2	1	1	3	2	4	2	4	2	Disagree	2	1	4	2	3	4	2	4	2	4	2	4	3	2	3	2	4
20	1	Female	2	Single	1	College/University or Above	4	Student	4	PHP 10,000 or less	1	Urban	2	Region IV-A	No	2	2	2	2	4	2	4	2	2	1	2	1	3	2	4	2	Disagree	2	1	4	2	4	4	2	3	2	4	2	4	3	2	3	2	4
21	1	Female	2	Single	1	College/University or Above	4	Student	4	PHP 10,000 or less	1	Urban	2	NCR	Yes	1	2	2	2	4	2	5	2	1	1	2	1	2	1	1	1	Disagree	2	1	3	2	3	4	2	3	2	4	2	4	4	2	4	2	4
27	1	Male	1	Single	1	College/University or Above	4	Blue Collar Worker	1	PHP 10,000 to 20,000	2	Urban	2	NCR	No	2	2	2	2	4	2	4	2	2	1	2	1	3	2	4	3	Disagree	2	1	3	2	3	4	2	3	2	4	2	4	3	2	3	2	4
23	1	Male	1	Single	1	College/University or Above	4	Professional/White Collar Worker	2	PHP 10,000 to 20,000	2	Urban	2	Region IV-A	No	2	2	2	2	4	2	5	2	3	2	3	2	3	2	2	1	Disagree	2	1	3	2	3	4	2	3	2	4	2	4	3	2	3	2	4
23	1	Female	2	Single	1	College/University or Above	4	Professional/White Collar Worker	2	PHP 10,000 to 20,000	2	Urban	2	NCR	No	2	2	2	2	4	2	4	2	3	2	3	2	3	2	1	3	Disagree	2	1	4	2	4	4	2	4	2	4	2	4	4	2	4	2	4
38	2	Male	1	Single	1	College/University or Above	4	Professional/White Collar Worker	2	PHP 10,000 to 20,000	2	Urban	2	Region III	No	2	2	2	2	4	2	5	2	2	1	2	1	3	2	4	4	Strongly Disagree	1	1	3	2	3	4	2	3	2	4	2	4	4	2	4	2	4
71	5	Female	2	Single	1	College/University or Above	4	Housewife/Retired/Unemployed/Other	5	PHP 10,000 to 20,000	2	Urban	2	Region VI	No	2	2	2	2	4	2	3	1	2	1	2	1	2	1	1	1	Disagree	2	1	3	2	3	3	2	3	2	3	2	3	3	2	3	2	4
32	2	Male	1	Married	2	College/University or Above	4	Professional/White Collar Worker	2	PHP 20,000 to 100,000	3	Urban	2	Region III	No	2	2	2	2	4	2	3	1	3	2	3	2	3	2	1	1	Disagree	2	1	4	2	4	4	2	3	2	4	2	4	3	2	3	2	3
34	2	Female	2	Married	2	College/University or Above	4	Professional/White Collar Worker	2	PHP 20,000 to 100,000	3	Urban	2	NCR	No	2	2	2	2	4	2	4	2	1	1	2	1	3	2	4	3	Disagree	2	1	3	2	4	4	2	4	2	4	2	4	3	2	3	2	3
66	5	Male	1	Married	2	College/University or Above	4	Self-employed	3	PHP 20,000 to 100,000	3	Urban	2	NCR	Yes	1	2	2	2	4	2	4	2	2	1	1	1	3	2	1	1	Disagree	2	1	4	2	4	4	2	3	2	4	2	4	3	2	3	2	4
20	1	Female	2	Single	1	College/University or Above	4	Student	4	PHP 20,000 to 100,000	3	Urban	2	NCR	No	2	2	2	2	4	2	3	1	2	1	2	1	2	1	1	2	Disagree	2	1	4	2	4	4	2	3	2	4	2	4	3	2	3	2	4
59	4	Female	2	Married	2	College/University or Above	4	Housewife/Retired/Unemployed/Other	5	PHP 20,000 to 100,000	3	Urban	2	Region IV-A	No	2	2	2	2	4	2	4	2	1	1	2	1	3	2	4	3	Disagree	2	1	3	2	3	4	2	3	2	4	2	3	3	2	3	2	3
56	4	Female	2	Single	1	College/University or Above	4	Professional/White Collar Worker	2	PHP 100,000 or more	4	Urban	2	NCR	No	2	2	2	2	4	2	3	1	2	1	3	2	3	2	4	3	Disagree	2	1	4	2	4	4	2	3	2	4	2	4	3	2	3	2	4
29	1	Male	1	Single	1	College/University or Above	4	Professional/White Collar Worker	2	PHP 10,000 or less	1	Urban	2	Region III	No	2	2	2	1	5	3	4	2	3	2	3	2	4	2	1	2	Disagree	2	1	3	2	3	4	2	3	2	4	2	4	4	2	4	2	3
56	4	Female	2	Married	2	College/University or Above	4	Self-employed	3	PHP 10,000 or less	1	Urban	2	Region VII	No	2	2	2	1	5	3	3	1	3	2	2	1	3	2	1	3	Disagree	2	1	3	2	2	3	2	3	2	4	2	4	3	2	3	2	3
24	1	Female	2	Single	1	College/University or Above	4	Professional/White Collar Worker	2	PHP 10,000 or less	1	Rural	1	Region VI	No	2	2	1	2	5	3	3	1	3	2	3	2	3	2	1	1	Disagree	2	1	3	2	3	4	2	3	2	4	2	4	4	2	4	2	4
19	1	Male	1	Single	1	College/University or Above	4	Student	4	PHP 10,000 or less	1	Rural	1	Region III	No	2	2	1	2	5	3	4	2	2	1	3	2	3	2	1	2	Disagree	2	1	3	2	4	4	2	3	2	4	2	4	3	2	3	2	3
19	1	Male	1	Single	1	College/University or Above	4	Student	4	PHP 10,000 or less	1	Rural	1	Region III	No	2	2	1	2	5	3	5	2	1	1	4	2	4	2	4	1	Disagree	2	1	3	2	3	4	2	3	2	4	2	4	4	2	4	2	3
21	1	Female	2	Single	1	College/University or Above	4	Student	4	PHP 10,000 or less	1	Rural	1	Region IV-A	No	2	2	1	2	5	3	3	1	1	1	2	1	2	1	1	1	Strongly Disagree	1	1	3	2	3	4	2	4	2	4	2	4	3	2	3	2	4
52	4	Female	2	Married	2	College/University or Above	4	Professional/White Collar Worker	2	PHP 10,000 to 20,000	2	Rural	1	Region X	No	2	2	1	2	5	3	4	2	2	1	2	1	3	2	4	1	Strongly Disagree	1	1	4	2	4	4	2	3	2	4	2	4	3	2	4	2	4
51	4	Female	2	Married	2	College/University or Above	4	Self-employed	3	PHP 10,000 to 20,000	2	Rural	1	NCR	Yes	1	2	1	2	5	3	3	1	2	1	2	1	3	2	4	1	Disagree	2	1	3	2	3	4	2	4	2	4	2	4	3	2	3	2	4
38	2	Female	2	Married	2	College/University or Above	4	Housewife/Retired/Unemployed/Other	5	PHP 10,000 to 20,000	2	Rural	1	Region IX	No	2	2	1	2	5	3	3	1	2	1	3	2	3	2	1	1	Strongly Disagree	1	1	3	2	3	4	2	3	2	4	2	4	3	2	3	2	3
53	4	Female	2	Single	1	College/University or Above	4	Professional/White Collar Worker	2	PHP 20,000 to 100,000	3	Rural	1	Region V	No	2	2	1	2	5	3	4	2	2	1	2	1	3	2	1	2	Disagree	2	1	3	2	3	4	2	3	2	3	2	3	3	2	3	2	4
20	1	Female	2	Single	1	College/University or Above	4	Student	4	PHP 20,000 to 100,000	3	Rural	1	Region III	No	2	2	1	2	5	3	4	2	1	1	2	1	3	2	4	1	Disagree	2	1	3	2	3	4	2	4	2	4	2	4	3	2	3	2	4
33	2	Female	2	Married	2	College/University or Above	4	Professional/White Collar Worker	2	PHP 100,000 or more	4	Rural	1	Region VII	No	2	2	1	2	5	3	3	1	2	1	2	1	2	1	1	1	Disagree	2	1	3	2	3	3	2	3	2	3	2	4	3	2	3	2	4
53	4	Female	2	Married	2	College/University or Above	4	Professional/White Collar Worker	2	PHP 100,000 or more	4	Rural	1	Region III	No	2	2	1	2	5	3	5	2	2	1	3	2	4	2	4	1	Strongly Disagree	1	1	4	2	2	4	2	3	2	4	2	4	3	2	4	2	3
29	1	Female	2	Single	1	College/University or Above	4	Blue Collar Worker	1	PHP 10,000 or less	1	Urban	2	Region IX	No	2	2	1	2	5	3	3	1	3	2	3	2	3	2	1	3	Disagree	2	1	3	2	3	4	2	4	2	4	2	4	4	2	4	2	4
21	1	Male	1	Single	1	College/University or Above	4	Student	4	PHP 10,000 or less	1	Urban	2	Region IV-A	No	2	2	1	2	5	3	3	1	2	1	3	2	3	2	1	3	Strongly Disagree	1	1	4	2	4	4	2	3	2	3	2	4	3	2	3	2	4
21	1	Female	2	Single	1	College/University or Above	4	Student	4	PHP 10,000 or less	1	Urban	2	Region IV-A	No	2	2	1	2	5	3	4	2	2	1	3	2	3	2	1	2	Disagree	2	1	4	2	4	3	2	3	2	4	2	4	3	2	3	2	4
21	1	Female	2	Single	1	College/University or Above	4	Student	4	PHP 10,000 or less	1	Urban	2	Region IX	No	2	2	1	2	5	3	4	2	2	1	2	1	2	1	1	1	Disagree	2	1	3	2	4	4	2	3	2	3	2	4	4	2	4	2	4
26	1	Male	1	Single	1	College/University or Above	4	Student	4	PHP 10,000 or less	1	Urban	2	NCR	Yes	1	2	1	2	5	3	5	2	3	2	3	2	3	2	1	4	Disagree	2	1	3	2	4	4	2	3	2	3	2	4	3	2	3	2	3
27	1	Female	2	Single	1	College/University or Above	4	Professional/White Collar Worker	2	PHP 10,000 to 20,000	2	Urban	2	NCR	No	2	2	1	2	5	3	3	1	2	1	3	2	3	2	1	1	Strongly Disagree	1	1	4	2	4	4	2	3	2	4	2	4	3	2	3	2	3
53	4	Female	2	Married	2	College/University or Above	4	Blue Collar Worker	1	PHP 20,000 to 100,000	3	Urban	2	NCR	Yes	1	2	1	2	5	3	4	2	2	1	3	2	3	2	4	1	Disagree	2	1	3	2	3	4	2	3	2	4	2	4	4	2	3	2	4
24	1	Female	2	Single	1	College/University or Above	4	Professional/White Collar Worker	2	PHP 20,000 to 100,000	3	Urban	2	NCR	No	2	2	1	2	5	3	5	2	2	1	3	2	3	2	4	1	Disagree	2	1	4	2	4	4	2	4	2	4	2	4	4	2	3	2	3
53	4	Female	2	Single	1	College/University or Above	4	Professional/White Collar Worker	2	PHP 20,000 to 100,000	3	Urban	2	NCR	No	2	2	1	2	5	3	4	2	1	1	3	2	3	2	1	1	Disagree	2	1	3	2	4	4	2	4	2	4	2	4	3	2	3	2	4
37	2	Female	2	Married	2	College/University or Above	4	Professional/White Collar Worker	2	PHP 20,000 to 100,000	3	Urban	2	Region VII	No	2	2	1	2	5	3	4	2	2	1	3	2	3	2	1	2	Disagree	2	1	3	2	3	4	2	3	2	4	2	4	3	2	3	2	3
39	2	Female	2	Married	2	College/University or Above	4	Professional/White Collar Worker	2	PHP 20,000 to 100,000	3	Urban	2	Region VIII	No	2	2	1	2	5	3	4	2	2	1	2	1	2	1	1	1	Disagree	2	1	3	2	3	4	2	3	2	3	2	4	3	2	3	2	3
48	3	Female	2	Married	2	College/University or Above	4	Professional/White Collar Worker	2	PHP 20,000 to 100,000	3	Urban	2	Region VII	No	2	2	1	2	5	3	4	2	1	1	1	1	3	2	1	1	Disagree	2	1	3	2	3	4	2	3	2	4	2	4	3	2	3	2	4
50	3	Female	2	Married	2	College/University or Above	4	Professional/White Collar Worker	2	PHP 20,000 to 100,000	3	Urban	2	Region X	No	2	2	1	2	5	3	3	1	2	1	2	1	2	1	1	3	Disagree	2	1	3	2	3	3	2	3	2	3	2	3	3	2	3	2	4
29	1	Male	1	Single	1	College/University or Above	4	Self-employed	3	PHP 20,000 to 100,000	3	Urban	2	Region XI	No	2	2	1	2	5	3	4	2	3	2	3	2	3	2	1	3	Disagree	2	1	3	2	3	3	2	3	2	3	2	3	3	2	3	2	3
20	1	Female	2	Single	1	College/University or Above	4	Student	4	PHP 20,000 to 100,000	3	Urban	2	Region III	No	2	2	1	2	5	3	3	1	2	1	2	1	2	1	1	1	Disagree	2	1	3	2	4	4	2	3	2	3	2	4	3	2	3	2	4
34	2	Female	2	Single	1	College/University or Above	4	Housewife/Retired/Unemployed/Other	5	PHP 20,000 to 100,000	3	Urban	2	Region IV-A	No	2	2	1	2	5	3	2	1	2	1	2	1	2	1	1	3	Disagree	2	1	4	2	4	3	2	4	2	4	2	4	3	2	3	2	4
62	5	Female	2	Married	2	College/University or Above	4	Housewife/Retired/Unemployed/Other	5	PHP 20,000 to 100,000	3	Urban	2	NCR	No	2	2	1	2	5	3	4	2	2	1	2	1	3	2	4	1	Disagree	2	1	4	2	4	4	2	3	2	4	2	4	3	2	3	2	4
55	4	Female	2	Married	2	College/University or Above	4	Professional/White Collar Worker	2	PHP 100,000 or more	4	Urban	2	NCR	Yes	1	2	1	2	5	3	2	1	2	1	2	1	3	2	1	2	Strongly Disagree	1	1	3	2	3	4	2	4	2	4	2	4	3	2	3	2	3
82	5	Male	1	Married	2	College/University or Above	4	Self-employed	3	PHP 100,000 or more	4	Urban	2	NCR	No	2	2	1	2	5	3	3	1	2	1	2	1	2	1	1	3	Disagree	2	1	3	2	3	4	2	3	2	3	2	3	3	2	3	2	3
19	1	Female	2	Single	1	College/University or Above	4	Student	4	PHP 10,000 or less	1	Rural	1	Region III	No	2	2	2	2	5	3	4	2	1	1	4	2	4	2	4	1	Strongly Disagree	1	1	4	2	4	4	2	4	2	4	2	4	4	2	3	2	4
20	1	Male	1	Single	1	College/University or Above	4	Student	4	PHP 10,000 or less	1	Rural	1	Region III	No	2	2	2	2	5	3	5	2	2	1	3	2	3	2	4	3	Strongly Disagree	1	1	3	2	4	4	2	4	2	4	2	4	4	2	4	2	3
20	1	Female	2	Single	1	College/University or Above	4	Student	4	PHP 10,000 or less	1	Rural	1	Region IV-A	No	2	2	2	2	5	3	3	1	2	1	2	1	2	1	1	3	Disagree	2	1	3	2	3	4	2	3	2	4	2	4	3	2	3	2	3
20	1	Male	1	Single	1	College/University or Above	4	Student	4	PHP 10,000 or less	1	Rural	1	Region VI	No	2	2	2	2	5	3	3	1	2	1	2	1	3	2	1	3	Strongly Disagree	1	1	3	2	3	3	2	3	2	3	2	3	3	2	3	2	3
22	1	Male	1	Single	1	College/University or Above	4	Housewife/Retired/Unemployed/Other	5	PHP 10,000 or less	1	Rural	1	Region VII	No	2	2	2	2	5	3	3	1	2	1	2	1	2	1	1	3	Strongly Disagree	1	1	4	2	4	4	2	4	2	4	2	4	4	2	4	2	4
19	1	Female	2	Single	1	College/University or Above	4	Student	4	PHP 10,000 to 20,000	2	Rural	1	Region III	No	2	2	2	2	5	3	5	2	2	1	2	1	3	2	1	5	Strongly Disagree	1	1	4	2	4	4	2	4	2	4	2	4	3	2	3	2	4
22	1	Female	2	Single	1	College/University or Above	4	Professional/White Collar Worker	2	PHP 20,000 to 100,000	3	Rural	1	Region III	No	2	2	2	2	5	3	3	1	2	1	2	1	2	1	1	1	Strongly Disagree	1	1	3	2	4	4	2	4	2	3	2	4	3	2	4	2	4
45	3	Male	1	Single	1	College/University or Above	4	Professional/White Collar Worker	2	PHP 10,000 or less	1	Urban	2	Region IV-A	No	2	2	2	2	5	3	3	1	2	1	2	1	3	2	4	1	Disagree	2	1	3	2	3	4	2	4	2	4	2	4	3	2	3	2	4
18	1	Female	2	Single	1	College/University or Above	4	Student	4	PHP 10,000 or less	1	Urban	2	NCR	No	2	2	2	2	5	3	3	1	2	1	3	2	3	2	4	3	Disagree	2	1	4	2	4	4	2	4	2	4	2	4	3	2	3	2	4
19	1	Female	2	Single	1	College/University or Above	4	Student	4	PHP 10,000 or less	1	Urban	2	Region VII	No	2	2	2	2	5	3	3	1	2	1	3	2	3	2	1	1	Strongly Disagree	1	1	3	2	3	3	2	3	2	3	2	4	3	2	3	2	3
21	1	Female	2	Single	1	College/University or Above	4	Student	4	PHP 10,000 or less	1	Urban	2	Region IV-A	No	2	2	2	2	5	3	4	2	1	1	2	1	4	2	4	3	Disagree	2	1	4	2	4	4	2	4	2	4	2	4	4	2	4	2	4
21	1	Female	2	Single	1	College/University or Above	4	Student	4	PHP 10,000 or less	1	Urban	2	NCR	No	2	2	2	2	5	3	3	1	1	1	2	1	2	1	1	3	Strongly Disagree	1	1	4	2	4	4	2	3	2	4	2	4	3	2	4	2	4
21	1	Male	1	Single	1	College/University or Above	4	Student	4	PHP 10,000 or less	1	Urban	2	NCR	No	2	2	2	2	5	3	3	1	1	1	2	1	2	1	1	3	Disagree	2	1	4	2	4	4	2	3	2	4	2	4	3	2	4	2	4
25	1	Female	2	Single	1	College/University or Above	4	Professional/White Collar Worker	2	PHP 10,000 to 20,000	2	Urban	2	NCR	Yes	1	2	2	2	5	3	3	1	2	1	3	2	3	2	4	1	Disagree	2	1	4	2	4	3	2	3	2	4	2	4	3	2	3	2	4
31	2	Male	1	Single	1	College/University or Above	4	Professional/White Collar Worker	2	PHP 10,000 to 20,000	2	Urban	2	Region VII	No	2	2	2	2	5	3	3	1	2	1	2	1	2	1	1	3	Disagree	2	1	3	2	3	3	2	3	2	3	2	3	3	2	3	2	4
32	2	Male	1	Single	1	College/University or Above	4	Blue Collar Worker	1	PHP 20,000 to 100,000	3	Urban	2	CAR	No	2	2	2	2	5	3	3	1	2	1	2	1	2	1	1	1	Strongly Disagree	1	1	3	2	3	4	2	3	2	3	2	3	4	2	4	2	4
26	1	Male	1	Single	1	College/University or Above	4	Professional/White Collar Worker	2	PHP 20,000 to 100,000	3	Urban	2	BARMM	No	2	2	2	2	5	3	4	2	3	2	3	2	3	2	4	1	Disagree	2	1	3	2	3	3	2	3	2	3	2	3	3	2	3	2	3
28	1	Male	1	Single	1	College/University or Above	4	Professional/White Collar Worker	2	PHP 20,000 to 100,000	3	Urban	2	Region XII	No	2	2	2	2	5	3	4	2	3	2	3	2	3	2	4	3	Disagree	2	1	3	2	3	4	2	4	2	4	2	4	3	2	3	2	4
57	4	Female	2	Married	2	College/University or Above	4	Housewife/Retired/Unemployed/Other	5	PHP 10,000 or less	1	Rural	1	Region VII	No	2	2	1	1	2	1	5	2	3	2	2	1	4	2	4	4	Agree	3	2	3	2	3	4	2	4	2	4	2	4	3	2	3	2	3
45	3	Female	2	Married	2	College/University or Above	4	Professional/White Collar Worker	2	PHP 20,000 to 100,000	3	Urban	2	Region IX	No	2	2	1	1	3	1	3	1	2	1	2	1	3	2	4	1	Agree	3	2	3	2	3	4	2	3	2	4	2	4	3	2	3	2	3
61	5	Male	1	Married	2	College/University or Above	4	Professional/White Collar Worker	2	PHP 20,000 to 100,000	3	Urban	2	NCR	No	2	2	1	1	3	1	5	2	1	1	1	1	3	2	4	1	Agree	3	2	4	2	4	4	2	3	2	4	2	4	3	2	3	2	3
63	5	Female	2	Married	2	College/University or Above	4	Professional/White Collar Worker	2	PHP 10,000 or less	1	Rural	1	Region III	No	2	2	2	1	3	1	3	1	2	1	3	2	3	2	4	3	Agree	3	2	3	2	3	3	2	3	2	3	2	4	3	2	3	2	3
21	1	Female	2	Single	1	College/University or Above	4	Student	4	PHP 10,000 or less	1	Rural	1	Region IV-A	No	2	1	1	2	3	1	3	1	2	1	2	1	3	2	1	3	Strongly Agree	4	2	4	2	4	4	2	3	2	4	2	4	4	2	3	2	4
22	1	Male	1	Single	1	College/University or Above	4	Professional/White Collar Worker	2	PHP 10,000 or less	1	Rural	1	Region VI	No	2	2	1	2	3	1	3	1	2	1	2	1	2	1	1	1	Agree	3	2	3	2	3	4	2	4	2	4	2	4	3	2	3	2	4
30	1	Female	2	Single	1	College/University or Above	4	Professional/White Collar Worker	2	PHP 20,000 to 100,000	3	Rural	1	Region VIII	No	2	2	1	2	3	1	3	1	3	2	2	1	3	2	1	3	Agree	3	2	4	2	4	3	2	3	2	4	2	4	3	2	4	2	4
66	5	Male	1	Married	2	College/University or Above	4	Housewife/Retired/Unemployed/Other	5	PHP 20,000 to 100,000	3	Rural	1	Region XIII	No	2	2	1	2	3	1	4	2	2	1	3	2	3	2	4	3	Agree	3	2	3	2	4	4	2	3	2	4	2	4	3	2	3	2	4
18	1	Female	2	Single	1	College/University or Above	4	Student	4	PHP 10,000 or less	1	Urban	2	Region IV-A	No	2	2	1	2	3	1	2	1	1	1	1	1	3	2	4	2	Agree	3	2	3	2	4	3	2	3	2	3	2	3	4	2	4	2	3
19	1	Female	2	Single	1	College/University or Above	4	Student	4	PHP 10,000 or less	1	Urban	2	NCR	Yes	1	2	1	2	3	1	3	1	1	1	3	2	4	2	4	1	Agree	3	2	4	2	3	3	2	4	2	3	2	3	3	2	3	2	3
25	1	Female	2	Single	1	College/University or Above	4	Student	4	PHP 10,000 or less	1	Urban	2	NCR	Yes	1	2	1	2	3	1	3	1	1	1	1	1	3	2	4	4	Agree	3	2	4	2	4	4	2	4	2	4	2	4	4	2	3	2	4
22	1	Female	2	Single	1	College/University or Above	4	Professional/White Collar Worker	2	PHP 20,000 to 100,000	3	Urban	2	NCR	Yes	1	2	1	2	3	1	4	2	2	1	2	1	3	2	1	3	Agree	3	2	4	2	3	4	2	3	2	4	2	3	4	2	4	2	4
36	2	Male	1	Single	1	College/University or Above	4	Professional/White Collar Worker	2	PHP 20,000 to 100,000	3	Urban	2	NCR	No	2	2	1	2	3	1	3	1	2	1	2	1	3	2	1	2	Agree	3	2	4	2	4	4	2	4	2	4	2	4	3	2	3	2	4
42	3	Female	2	Married	2	College/University or Above	4	Professional/White Collar Worker	2	PHP 20,000 to 100,000	3	Urban	2	NCR	Yes	1	2	1	2	3	1	3	1	2	1	2	1	3	2	4	1	Strongly Agree	4	2	4	2	4	4	2	4	2	4	2	4	3	2	3	2	4
47	3	Female	2	Married	2	College/University or Above	4	Professional/White Collar Worker	2	PHP 20,000 to 100,000	3	Urban	2	NCR	Yes	1	2	1	2	3	1	3	1	2	1	2	1	3	2	4	1	Agree	3	2	4	2	4	4	2	4	2	4	2	4	3	2	3	2	4
60	4	Male	1	Married	2	College/University or Above	4	Professional/White Collar Worker	2	PHP 20,000 to 100,000	3	Urban	2	NCR	Yes	1	2	1	2	3	1	5	2	2	1	2	1	3	2	4	1	Agree	3	2	4	2	4	4	2	3	2	3	2	4	4	2	3	2	3
45	3	Female	2	Single	1	College/University or Above	4	Self-employed	3	PHP 20,000 to 100,000	3	Urban	2	Region IV-B	No	2	2	1	2	3	1	3	1	1	1	2	1	3	2	4	3	Agree	3	2	3	2	3	4	2	4	2	4	2	4	3	2	3	2	3
18	1	Male	1	Single	1	College/University or Above	4	Student	4	PHP 10,000 or less	1	Rural	1	Region III	No	2	2	2	2	3	1	3	1	1	1	1	1	3	2	1	3	Agree	3	2	3	2	4	4	2	4	2	4	2	4	4	2	4	2	4
19	1	Female	2	Single	1	College/University or Above	4	Student	4	PHP 10,000 or less	1	Rural	1	Region XII	No	2	2	2	2	3	1	4	2	2	1	2	1	4	2	4	1	Agree	3	2	4	2	4	3	2	3	2	3	2	4	4	2	4	2	4
58	4	Male	1	Married	2	College/University or Above	4	Professional/White Collar Worker	2	PHP 20,000 to 100,000	3	Rural	1	Region III	No	2	2	2	2	3	1	3	1	3	2	3	2	3	2	1	2	Agree	3	2	3	2	3	3	2	3	2	3	2	3	3	2	3	2	3
19	1	Female	2	Single	1	College/University or Above	4	Student	4	PHP 10,000 or less	1	Urban	2	NCR	No	2	2	2	2	3	1	2	1	1	1	2	1	2	1	1	1	Agree	3	2	4	2	4	4	2	4	2	4	2	4	3	2	3	2	4
21	1	Male	1	Single	1	College/University or Above	4	Student	4	PHP 10,000 or less	1	Urban	2	NCR	Yes	1	2	2	2	3	1	3	1	2	1	2	1	2	1	4	3	Agree	3	2	3	2	3	3	2	3	2	3	2	3	3	2	3	2	3
40	2	Female	2	Married	2	College/University or Above	4	Professional/White Collar Worker	2	PHP 20,000 to 100,000	3	Urban	2	Region X	No	2	2	2	2	3	1	5	2	2	1	3	2	4	2	4	1	Strongly Agree	4	2	4	2	4	4	2	4	2	4	2	4	4	2	4	2	3
42	3	Female	2	Married	2	College/University or Above	4	Professional/White Collar Worker	2	PHP 20,000 to 100,000	3	Urban	2	Region IX	No	2	2	2	2	3	1	3	1	2	1	2	1	3	2	1	6	Agree	3	2	3	2	3	4	2	4	2	3	2	3	4	2	4	2	4
37	2	Female	2	Married	2	College/University or Above	4	Professional/White Collar Worker	2	PHP 20,000 to 100,000	3	Rural	1	Region III	No	2	1	1	1	4	2	2	1	2	1	2	1	2	1	1	2	Agree	3	2	4	2	4	4	2	3	2	4	2	4	3	2	3	2	4
51	4	Female	2	Married	2	College/University or Above	4	Housewife/Retired/Unemployed/Other	5	PHP 10,000 or less	1	Rural	1	Region IV-A	No	2	2	1	1	4	2	3	1	2	1	2	1	3	2	1	2	Agree	3	2	3	2	4	4	2	3	2	4	2	4	3	2	3	2	4
44	3	Male	1	Single	1	College/University or Above	4	Professional/White Collar Worker	2	PHP 20,000 to 100,000	3	Rural	1	Region IV-A	No	2	2	1	1	4	2	3	1	2	1	2	1	3	2	4	2	Agree	3	2	3	2	3	3	2	3	2	3	2	3	3	2	3	2	3
55	4	Male	1	Single	1	College/University or Above	4	Professional/White Collar Worker	2	PHP 20,000 to 100,000	3	Rural	1	Region VII	No	2	2	1	1	4	2	5	2	3	2	3	2	4	2	4	1	Strongly Agree	4	2	3	2	4	4	2	3	2	4	2	4	3	2	3	2	4
59	4	Male	1	Married	2	College/University or Above	4	Housewife/Retired/Unemployed/Other	5	PHP 10,000 or less	1	Urban	2	Region II	No	2	2	1	1	4	2	4	2	2	1	2	1	3	2	1	3	Agree	3	2	3	2	4	4	2	3	2	4	2	4	3	2	4	2	3
55	4	Female	2	Married	2	College/University or Above	4	Professional/White Collar Worker	2	PHP 10,000 to 20,000	2	Urban	2	Region X	No	2	2	1	1	4	2	5	2	2	1	2	1	3	2	4	1	Agree	3	2	4	2	4	4	2	3	2	4	2	4	3	2	3	2	4
61	5	Female	2	Single	1	College/University or Above	4	Professional/White Collar Worker	2	PHP 20,000 to 100,000	3	Urban	2	NCR	No	2	2	1	1	4	2	5	2	2	1	3	2	3	2	4	1	Agree	3	2	3	2	3	4	2	4	2	4	2	4	3	2	3	2	3
43	3	Female	2	Married	2	College/University or Above	4	Professional/White Collar Worker	2	PHP 20,000 to 100,000	3	Urban	2	NCR	No	2	2	1	1	4	2	4	2	2	1	3	2	3	2	1	2	Agree	3	2	4	2	4	4	2	3	2	4	2	4	3	2	3	2	4
43	3	Male	1	Married	2	College/University or Above	4	Professional/White Collar Worker	2	PHP 20,000 to 100,000	3	Urban	2	NCR	No	2	2	1	1	4	2	3	1	1	1	1	1	3	2	4	1	Agree	3	2	3	2	3	4	2	3	2	4	2	4	3	2	3	2	4
67	5	Male	1	Married	2	College/University or Above	4	Housewife/Retired/Unemployed/Other	5	PHP 20,000 to 100,000	3	Urban	2	Region VI	No	2	2	1	1	4	2	4	2	2	1	2	1	3	2	4	2	Agree	3	2	3	2	3	3	2	3	2	3	2	3	3	2	3	2	3
71	5	Female	2	Married	2	College/University or Above	4	Housewife/Retired/Unemployed/Other	5	PHP 20,000 to 100,000	3	Urban	2	NCR	No	2	2	1	1	4	2	3	1	2	1	2	1	3	2	4	3	Agree	3	2	4	2	4	4	2	4	2	4	2	4	3	2	3	2	4
72	5	Female	2	Married	2	College/University or Above	4	Housewife/Retired/Unemployed/Other	5	PHP 20,000 to 100,000	3	Urban	2	Region IV-A	Yes	1	2	1	1	4	2	5	2	3	2	3	2	3	2	4	2	Agree	3	2	3	2	3	3	2	3	2	3	2	3	3	2	3	2	3
57	4	Female	2	Married	2	College/University or Above	4	Housewife/Retired/Unemployed/Other	5	PHP 100,000 or more	4	Urban	2	Region VII	No	2	2	1	1	4	2	4	2	2	1	2	1	3	2	4	1	Agree	3	2	4	2	4	4	2	3	2	4	2	4	3	2	3	2	3
58	4	Female	2	Married	2	College/University or Above	4	Housewife/Retired/Unemployed/Other	5	PHP 100,000 or more	4	Urban	2	Region VII	No	2	2	1	1	4	2	5	2	1	1	1	1	4	2	4	1	Agree	3	2	4	2	4	3	2	3	2	4	2	4	3	2	3	2	4
27	1	Female	2	Married	2	College/University or Above	4	Professional/White Collar Worker	2	PHP 10,000 to 20,000	2	Rural	1	Region III	No	2	2	2	1	4	2	4	2	2	1	2	1	3	2	4	3	Agree	3	2	4	2	4	4	2	3	2	4	2	4	3	2	3	2	4
62	5	Male	1	Married	2	College/University or Above	4	Self-employed	3	PHP 10,000 to 20,000	2	Urban	2	NCR	Yes	1	1	1	2	4	2	3	1	2	1	2	1	3	2	1	3	Agree	3	2	4	2	4	4	2	3	2	4	2	4	3	2	4	2	4
33	2	Female	2	Married	2	College/University or Above	4	Professional/White Collar Worker	2	PHP 20,000 to 100,000	3	Urban	2	NCR	No	2	1	1	2	4	2	3	1	1	1	2	1	3	2	1	1	Agree	3	2	3	2	4	4	2	3	2	4	2	4	3	2	3	2	4
23	1	Female	2	Single	1	College/University or Above	4	Professional/White Collar Worker	2	PHP 10,000 or less	1	Rural	1	Region III	No	2	2	1	2	4	2	3	1	2	1	3	2	2	1	1	3	Agree	3	2	4	2	4	4	2	3	2	4	2	4	3	2	3	2	4
19	1	Female	2	Single	1	College/University or Above	4	Student	4	PHP 10,000 or less	1	Rural	1	Region XIII	No	2	2	1	2	4	2	3	1	2	1	3	2	3	2	4	3	Agree	3	2	3	2	4	3	2	3	2	4	2	4	3	2	3	2	3
20	1	Female	2	Single	1	College/University or Above	4	Student	4	PHP 10,000 or less	1	Rural	1	Region IV-B	No	2	2	1	2	4	2	3	1	2	1	3	2	3	2	1	2	Agree	3	2	4	2	4	4	2	4	2	4	2	4	3	2	3	2	4
20	1	Male	1	Single	1	College/University or Above	4	Student	4	PHP 10,000 or less	1	Rural	1	Region III	No	2	2	1	2	4	2	3	1	2	1	3	2	3	2	1	1	Agree	3	2	4	2	4	3	2	3	2	4	2	4	3	2	3	2	3
21	1	Female	2	Single	1	College/University or Above	4	Professional/White Collar Worker	2	PHP 10,000 to 20,000	2	Rural	1	Region V	No	2	2	1	2	4	2	4	2	2	1	3	2	4	2	1	1	Agree	3	2	3	2	3	4	2	4	2	4	2	4	4	2	4	2	3
24	1	Male	1	Single	1	College/University or Above	4	Professional/White Collar Worker	2	PHP 10,000 to 20,000	2	Rural	1	Region VII	No	2	2	1	2	4	2	4	2	3	2	3	2	3	2	1	1	Agree	3	2	3	2	3	3	2	3	2	4	2	4	3	2	3	2	4
27	1	Male	1	Single	1	College/University or Above	4	Professional/White Collar Worker	2	PHP 10,000 to 20,000	2	Rural	1	Region IV-A	No	2	2	1	2	4	2	3	1	3	2	3	2	3	2	4	3	Agree	3	2	3	2	3	3	2	3	2	4	2	4	3	2	3	2	3
37	2	Female	2	Married	2	College/University or Above	4	Professional/White Collar Worker	2	PHP 10,000 to 20,000	2	Rural	1	Region VI	No	2	2	1	2	4	2	4	2	2	1	3	2	3	2	4	3	Agree	3	2	3	2	3	4	2	3	2	4	2	4	3	2	3	2	4
33	2	Male	1	Single	1	College/University or Above	4	Professional/White Collar Worker	2	PHP 20,000 to 100,000	3	Rural	1	Region VI	No	2	2	1	2	4	2	4	2	2	1	3	2	4	2	4	1	Agree	3	2	4	2	4	4	2	4	2	4	2	4	4	2	4	2	3
34	2	Female	2	Single	1	College/University or Above	4	Professional/White Collar Worker	2	PHP 20,000 to 100,000	3	Rural	1	Region VII	No	2	2	1	2	4	2	4	2	2	1	3	2	3	2	4	3	Agree	3	2	4	2	4	4	2	3	2	3	2	4	3	2	3	2	4
52	4	Female	2	Single	1	College/University or Above	4	Professional/White Collar Worker	2	PHP 20,000 to 100,000	3	Rural	1	Region IV-B	No	2	2	1	2	4	2	5	2	1	1	1	1	3	2	4	1	Agree	3	2	4	2	4	4	2	3	2	4	2	4	4	2	3	2	4
37	2	Female	2	Married	2	College/University or Above	4	Professional/White Collar Worker	2	PHP 20,000 to 100,000	3	Rural	1	Region IV-B	No	2	2	1	2	4	2	4	2	2	1	3	2	3	2	1	3	Agree	3	2	4	2	4	4	2	3	2	4	2	4	4	2	3	2	4
38	2	Female	2	Married	2	College/University or Above	4	Professional/White Collar Worker	2	PHP 20,000 to 100,000	3	Rural	1	Region IV-B	No	2	2	1	2	4	2	3	1	2	1	2	1	3	2	1	1	Agree	3	2	4	2	4	4	2	3	2	4	2	4	3	2	3	2	4
51	4	Female	2	Married	2	College/University or Above	4	Professional/White Collar Worker	2	PHP 20,000 to 100,000	3	Rural	1	Region VII	No	2	2	1	2	4	2	3	1	2	1	2	1	3	2	4	1	Agree	3	2	4	2	4	4	2	3	2	4	2	4	3	2	3	2	4
61	5	Female	2	Married	2	College/University or Above	4	Professional/White Collar Worker	2	PHP 20,000 to 100,000	3	Rural	1	Region II	No	2	2	1	2	4	2	4	2	2	1	3	2	3	2	4	1	Agree	3	2	3	2	3	4	2	4	2	4	2	4	4	2	4	2	4
40	2	Male	1	Single	1	College/University or Above	4	Student	4	PHP 20,000 to 100,000	3	Rural	1	Region VIII	No	2	2	1	2	4	2	3	1	2	1	2	1	3	2	4	1	Agree	3	2	4	2	3	4	2	4	2	4	2	4	3	2	3	2	4
53	4	Male	1	Single	1	College/University or Above	4	Professional/White Collar Worker	2	PHP 100,000 or more	4	Rural	1	Region XII	No	2	2	1	2	4	2	5	2	3	2	3	2	3	2	4	2	Agree	3	2	4	2	4	4	2	3	2	4	2	4	4	2	3	2	3
60	4	Male	1	Married	2	College/University or Above	4	Professional/White Collar Worker	2	PHP 100,000 or more	4	Rural	1	Region IV-A	No	2	2	1	2	4	2	3	1	1	1	2	1	3	2	4	1	Agree	3	2	4	2	4	3	2	3	2	4	2	4	3	2	3	2	4
32	2	Female	2	Single	1	College/University or Above	4	Blue Collar Worker	1	PHP 10,000 or less	1	Urban	2	Region VIII	No	2	2	1	2	4	2	3	1	3	2	3	2	3	2	1	1	Agree	3	2	4	2	4	3	2	3	2	4	2	4	3	2	3	2	4
22	1	Female	2	Single	1	College/University or Above	4	Professional/White Collar Worker	2	PHP 10,000 or less	1	Urban	2	Region VI	No	2	2	1	2	4	2	3	1	2	1	3	2	3	2	4	3	Agree	3	2	4	2	4	4	2	3	2	4	2	4	3	2	3	2	4
20	1	Male	1	Single	1	College/University or Above	4	Student	4	PHP 10,000 or less	1	Urban	2	Region IV-A	No	2	2	1	2	4	2	4	2	1	1	2	1	3	2	4	1	Agree	3	2	4	2	4	4	2	3	2	4	2	4	4	2	4	2	4
20	1	Male	1	Single	1	College/University or Above	4	Student	4	PHP 10,000 or less	1	Urban	2	Region III	No	2	2	1	2	4	2	4	2	1	1	2	1	3	2	4	1	Agree	3	2	4	2	4	3	2	3	2	3	2	4	3	2	3	2	3
21	1	Male	1	Single	1	College/University or Above	4	Student	4	PHP 10,000 or less	1	Urban	2	NCR	No	2	2	1	2	4	2	4	2	2	1	3	2	3	2	1	3	Agree	3	2	3	2	3	4	2	3	2	4	2	4	3	2	3	2	4
30	1	Male	1	Single	1	College/University or Above	4	Student	4	PHP 10,000 or less	1	Urban	2	NCR	Yes	1	2	1	2	4	2	4	2	3	2	3	2	3	2	1	3	Agree	3	2	4	2	4	3	2	3	2	4	2	4	3	2	3	2	4
41	3	Female	2	Married	2	College/University or Above	4	Housewife/Retired/Unemployed/Other	5	PHP 10,000 or less	1	Urban	2	Region VII	No	2	2	1	2	4	2	5	2	2	1	2	1	3	2	4	2	Agree	3	2	3	2	3	4	2	3	2	4	2	3	3	2	3	2	3
24	1	Male	1	Single	1	College/University or Above	4	Professional/White Collar Worker	2	PHP 10,000 to 20,000	2	Urban	2	NCR	No	2	2	1	2	4	2	4	2	3	2	2	1	4	2	4	2	Agree	3	2	3	2	4	4	2	3	2	4	2	4	4	2	4	2	4
38	2	Male	1	Single	1	College/University or Above	4	Professional/White Collar Worker	2	PHP 10,000 to 20,000	2	Urban	2	NCR	No	2	2	1	2	4	2	4	2	2	1	2	1	3	2	1	1	Agree	3	2	3	2	4	4	2	3	2	3	2	4	4	2	4	2	4
30	1	Male	1	Married	2	College/University or Above	4	Professional/White Collar Worker	2	PHP 10,000 to 20,000	2	Urban	2	NCR	No	2	2	1	2	4	2	3	1	2	1	3	2	3	2	4	3	Agree	3	2	3	2	4	3	2	3	2	3	2	4	3	2	3	2	4
44	3	Female	2	Married	2	College/University or Above	4	Professional/White Collar Worker	2	PHP 10,000 to 20,000	2	Urban	2	Region VII	No	2	2	1	2	4	2	4	2	3	2	3	2	3	2	4	1	Agree	3	2	4	2	4	4	2	3	2	4	2	4	4	2	4	2	3
27	1	Female	2	Single	1	College/University or Above	4	Professional/White Collar Worker	2	PHP 20,000 to 100,000	3	Urban	2	NCR	Yes	1	2	1	2	4	2	3	1	3	2	3	2	3	2	1	3	Agree	3	2	3	2	3	3	2	3	2	3	2	3	3	2	3	2	3
27	1	Female	2	Single	1	College/University or Above	4	Professional/White Collar Worker	2	PHP 20,000 to 100,000	3	Urban	2	NCR	No	2	2	1	2	4	2	5	2	1	1	3	2	3	2	4	1	Agree	3	2	3	2	4	4	2	3	2	3	2	4	3	2	3	2	3
28	1	Female	2	Single	1	College/University or Above	4	Professional/White Collar Worker	2	PHP 20,000 to 100,000	3	Urban	2	NCR	No	2	2	1	2	4	2	4	2	2	1	2	1	2	1	1	4	Agree	3	2	4	2	4	3	2	3	2	4	2	4	4	2	4	2	4
30	1	Male	1	Single	1	College/University or Above	4	Professional/White Collar Worker	2	PHP 20,000 to 100,000	3	Urban	2	NCR	Yes	1	2	1	2	4	2	4	2	3	2	2	1	3	2	1	3	Agree	3	2	4	2	4	4	2	4	2	4	2	4	4	2	3	2	4
31	2	Female	2	Single	1	College/University or Above	4	Professional/White Collar Worker	2	PHP 20,000 to 100,000	3	Urban	2	Region VII	No	2	2	1	2	4	2	4	2	2	1	3	2	4	2	4	3	Agree	3	2	3	2	3	4	2	3	2	4	2	4	3	2	3	2	4
56	4	Female	2	Single	1	College/University or Above	4	Professional/White Collar Worker	2	PHP 20,000 to 100,000	3	Urban	2	NCR	Yes	1	2	1	2	4	2	4	2	1	1	2	1	3	2	1	1	Agree	3	2	4	2	4	4	2	3	2	4	2	4	3	2	3	2	4
58	4	Female	2	Single	1	College/University or Above	4	Professional/White Collar Worker	2	PHP 20,000 to 100,000	3	Urban	2	NCR	No	2	2	1	2	4	2	4	2	1	1	1	1	3	2	4	2	Agree	3	2	3	2	3	4	2	3	2	4	2	4	3	2	3	2	4
31	2	Male	1	Married	2	College/University or Above	4	Professional/White Collar Worker	2	PHP 20,000 to 100,000	3	Urban	2	Region IX	No	2	2	1	2	4	2	4	2	3	2	3	2	3	2	1	4	Agree	3	2	3	2	3	4	2	4	2	4	2	4	3	2	3	2	3
39	2	Male	1	Married	2	College/University or Above	4	Professional/White Collar Worker	2	PHP 20,000 to 100,000	3	Urban	2	NCR	No	2	2	1	2	4	2	2	1	1	1	2	1	2	1	4	3	Agree	3	2	3	2	4	4	2	3	2	4	2	4	3	2	3	2	4
39	2	Female	2	Married	2	College/University or Above	4	Professional/White Collar Worker	2	PHP 20,000 to 100,000	3	Urban	2	NCR	No	2	2	1	2	4	2	4	2	1	1	1	1	4	2	4	2	Agree	3	2	3	2	4	3	2	3	2	4	2	4	4	2	4	2	3
40	2	Female	2	Married	2	College/University or Above	4	Professional/White Collar Worker	2	PHP 20,000 to 100,000	3	Urban	2	Region VI	No	2	2	1	2	4	2	3	1	2	1	2	1	2	1	1	1	Agree	3	2	4	2	4	4	2	3	2	4	2	4	3	2	3	2	4
45	3	Female	2	Married	2	College/University or Above	4	Professional/White Collar Worker	2	PHP 20,000 to 100,000	3	Urban	2	Region VII	No	2	2	1	2	4	2	4	2	1	1	2	1	3	2	4	2	Agree	3	2	4	2	4	4	2	4	2	4	2	4	4	2	4	2	4
46	3	Female	2	Married	2	College/University or Above	4	Professional/White Collar Worker	2	PHP 20,000 to 100,000	3	Urban	2	Region IV-B	No	2	2	1	2	4	2	4	2	1	1	2	1	3	2	4	1	Agree	3	2	4	2	4	4	2	3	2	4	2	4	4	2	3	2	3
42	3	Male	1	Single	1	College/University or Above	4	Self-employed	3	PHP 20,000 to 100,000	3	Urban	2	NCR	Yes	1	2	1	2	4	2	3	1	2	1	2	1	3	2	4	1	Agree	3	2	3	2	4	4	2	3	2	4	2	4	3	2	3	2	3
60	4	Female	2	Married	2	College/University or Above	4	Self-employed	3	PHP 20,000 to 100,000	3	Urban	2	NCR	No	2	2	1	2	4	2	4	2	1	1	2	1	3	2	4	1	Agree	3	2	3	2	4	4	2	3	2	3	2	4	3	2	4	2	3
62	5	Female	2	Married	2	College/University or Above	4	Self-employed	3	PHP 20,000 to 100,000	3	Urban	2	NCR	Yes	1	2	1	2	4	2	3	1	2	1	1	1	2	1	4	1	Agree	3	2	3	2	4	4	2	3	2	3	2	4	3	2	3	2	4
21	1	Female	2	Single	1	College/University or Above	4	Student	4	PHP 20,000 to 100,000	3	Urban	2	NCR	Yes	1	2	1	2	4	2	3	1	1	1	2	1	2	1	3	1	Strongly Agree	4	2	4	2	4	4	2	4	2	4	2	4	3	2	3	2	4
21	1	Male	1	Single	1	College/University or Above	4	Student	4	PHP 20,000 to 100,000	3	Urban	2	Region IV-A	No	2	2	1	2	4	2	4	2	1	1	1	1	3	2	4	3	Agree	3	2	3	2	4	3	2	4	2	4	2	3	4	2	4	2	3
62	5	Female	2	Single	1	College/University or Above	4	Housewife/Retired/Unemployed/Other	5	PHP 20,000 to 100,000	3	Urban	2	Region IX	No	2	2	1	2	4	2	3	1	1	1	1	1	3	2	4	2	Agree	3	2	3	2	3	3	2	3	2	3	2	3	3	2	4	2	4
61	5	Male	1	Married	2	College/University or Above	4	Housewife/Retired/Unemployed/Other	5	PHP 20,000 to 100,000	3	Urban	2	NCR	No	2	2	1	2	4	2	4	2	2	1	2	1	3	2	4	2	Agree	3	2	3	2	3	3	2	3	2	3	2	3	3	2	3	2	3
42	3	Female	2	Married	2	College/University or Above	4	Professional/White Collar Worker	2	PHP 100,000 or more	4	Urban	2	NCR	Yes	1	2	1	2	4	2	4	2	2	1	2	1	3	2	4	3	Agree	3	2	3	2	3	3	2	3	2	3	2	3	3	2	3	2	3
54	4	Male	1	Married	2	College/University or Above	4	Professional/White Collar Worker	2	PHP 100,000 or more	4	Urban	2	NCR	No	2	2	1	2	4	2	4	2	2	1	2	1	3	2	4	1	Agree	3	2	4	2	4	4	2	3	2	4	2	4	3	2	3	2	3
21	1	Female	2	Single	1	College/University or Above	4	Student	4	PHP 100,000 or more	4	Urban	2	Region IV-A	No	2	2	1	2	4	2	5	2	2	1	2	1	3	2	1	3	Agree	3	2	4	2	4	4	2	3	2	4	2	4	3	2	3	2	4
31	2	Female	2	Married	2	College/University or Above	4	Professional/White Collar Worker	2	PHP 10,000 to 20,000	2	Rural	1	Region VII	No	2	2	2	2	4	2	3	1	2	1	2	1	2	1	1	1	Agree	3	2	3	2	3	4	2	3	2	3	2	3	3	2	3	2	4
53	4	Female	2	Single	1	College/University or Above	4	Professional/White Collar Worker	2	PHP 20,000 to 100,000	3	Rural	1	Region VII	No	2	2	2	2	4	2	2	1	1	1	1	1	1	1	1	1	Agree	3	2	3	2	1	4	2	3	2	3	2	3	3	2	3	2	4
21	1	Male	1	Single	1	College/University or Above	4	Student	4	PHP 20,000 to 100,000	3	Rural	1	Region III	No	2	2	2	2	4	2	3	1	1	1	1	1	3	2	4	3	Agree	3	2	4	2	4	4	2	3	2	4	2	4	3	2	3	2	4
19	1	Male	1	Single	1	College/University or Above	4	Student	4	PHP 10,000 or less	1	Urban	2	NCR	No	2	2	2	2	4	2	5	2	2	1	3	2	3	2	1	5	Strongly Agree	4	2	4	2	4	4	2	4	2	4	2	4	4	2	4	2	3
19	1	Male	1	Single	1	College/University or Above	4	Student	4	PHP 10,000 or less	1	Urban	2	NCR	No	2	2	2	2	4	2	4	2	2	1	2	1	3	2	1	3	Agree	3	2	3	2	3	4	2	3	2	4	2	4	3	2	3	2	3
20	1	Female	2	Single	1	College/University or Above	4	Student	4	PHP 10,000 or less	1	Urban	2	NCR	No	2	2	2	2	4	2	4	2	1	1	2	1	4	2	4	3	Agree	3	2	4	2	4	3	2	3	2	4	2	4	3	2	3	2	4
20	1	Male	1	Single	1	College/University or Above	4	Student	4	PHP 10,000 or less	1	Urban	2	NCR	Yes	1	2	2	2	4	2	3	1	1	1	3	2	4	2	4	1	Strongly Agree	4	2	4	2	4	4	2	4	2	4	2	4	3	2	3	2	4
21	1	Female	2	Single	1	College/University or Above	4	Student	4	PHP 10,000 or less	1	Urban	2	Region III	No	2	2	2	2	4	2	4	2	2	1	2	1	4	2	1	4	Strongly Agree	4	2	4	2	4	4	2	3	2	4	2	4	4	2	4	2	4
40	2	Female	2	Single	1	College/University or Above	4	Student	4	PHP 10,000 or less	1	Urban	2	NCR	No	2	2	2	2	4	2	3	1	2	1	3	2	3	2	4	1	Agree	3	2	3	2	3	3	2	3	2	3	2	3	3	2	3	2	3
51	4	Female	2	Married	2	College/University or Above	4	Professional/White Collar Worker	2	PHP 10,000 to 20,000	2	Urban	2	Region IV-A	No	2	2	2	2	4	2	3	1	2	1	2	1	3	2	1	2	Agree	3	2	3	2	3	4	2	4	2	4	2	4	3	2	3	2	3
22	1	Female	2	Single	1	College/University or Above	4	Self-employed	3	PHP 10,000 to 20,000	2	Urban	2	Region III	No	2	2	2	2	4	2	3	1	2	1	2	1	3	2	4	3	Agree	3	2	3	2	3	3	2	3	2	3	2	3	3	2	3	2	3
34	2	Female	2	Married	2	College/University or Above	4	Professional/White Collar Worker	2	PHP 20,000 to 100,000	3	Urban	2	Region VII	No	2	2	2	2	4	2	3	1	2	1	2	1	2	1	1	2	Agree	3	2	3	2	3	3	2	3	2	4	2	4	3	2	3	2	4
39	2	Female	2	Married	2	College/University or Above	4	Professional/White Collar Worker	2	PHP 20,000 to 100,000	3	Urban	2	NCR	No	2	2	2	2	4	2	3	1	2	1	2	1	2	1	1	3	Agree	3	2	4	2	4	4	2	3	2	4	2	4	3	2	3	2	4
60	4	Female	2	Married	2	College/University or Above	4	Housewife/Retired/Unemployed/Other	5	PHP 20,000 to 100,000	3	Urban	2	NCR	Yes	1	2	1	1	5	3	4	2	1	1	2	1	4	2	4	3	Agree	3	2	4	2	4	4	2	3	2	4	2	4	3	2	3	2	3
68	5	Female	2	Married	2	College/University or Above	4	Housewife/Retired/Unemployed/Other	5	PHP 20,000 to 100,000	3	Urban	2	NCR	Yes	1	2	1	1	5	3	4	2	3	2	3	2	3	2	4	2	Agree	3	2	3	2	3	4	2	3	2	3	2	3	3	2	3	2	3
57	4	Female	2	Single	1	College/University or Above	4	Professional/White Collar Worker	2	PHP 20,000 to 100,000	3	Urban	2	NCR	Yes	1	2	2	1	5	3	4	2	1	1	2	1	3	2	1	3	Agree	3	2	4	2	4	4	2	3	2	3	2	3	3	2	3	2	4
27	1	Female	2	Single	1	College/University or Above	4	Professional/White Collar Worker	2	PHP 10,000 to 20,000	2	Rural	1	Region VII	No	2	2	1	2	5	3	3	1	2	1	2	1	3	2	4	2	Agree	3	2	3	2	4	4	2	3	2	4	2	4	3	2	3	2	4
24	1	Male	1	Single	1	College/University or Above	4	Professional/White Collar Worker	2	PHP 20,000 to 100,000	3	Rural	1	Region III	No	2	2	1	2	5	3	5	2	1	1	1	1	4	2	1	4	Strongly Agree	4	2	4	2	4	4	2	3	2	4	2	4	3	2	3	2	4
43	3	Male	1	Single	1	College/University or Above	4	Professional/White Collar Worker	2	PHP 20,000 to 100,000	3	Rural	1	Region VI	No	2	2	1	2	5	3	5	2	2	1	2	1	4	2	1	1	Agree	3	2	4	2	4	4	2	3	2	4	2	4	4	2	4	2	3
56	4	Female	2	Married	2	College/University or Above	4	Professional/White Collar Worker	2	PHP 20,000 to 100,000	3	Rural	1	Region VII	No	2	2	1	2	5	3	3	1	2	1	2	1	3	2	4	1	Agree	3	2	3	2	3	4	2	3	2	3	2	3	3	2	3	2	4
19	1	Male	1	Single	1	College/University or Above	4	Student	4	PHP 10,000 or less	1	Urban	2	NCR	Yes	1	2	1	2	5	3	5	2	1	1	4	2	4	2	1	4	Agree	3	2	4	2	4	4	2	4	2	4	2	4	4	2	4	2	4
19	1	Female	2	Single	1	College/University or Above	4	Student	4	PHP 10,000 or less	1	Urban	2	Region IV-A	No	2	2	1	2	5	3	4	2	1	1	4	2	3	2	3	3	Agree	3	2	4	2	4	4	2	4	2	3	2	4	4	2	4	2	4
20	1	Female	2	Single	1	College/University or Above	4	Student	4	PHP 10,000 or less	1	Urban	2	Region VII	No	2	2	1	2	5	3	3	1	2	1	3	2	4	2	1	2	Agree	3	2	4	2	4	4	2	3	2	4	2	4	3	2	3	2	4
64	5	Female	2	Married	2	College/University or Above	4	Housewife/Retired/Unemployed/Other	5	PHP 10,000 or less	1	Urban	2	NCR	No	2	2	1	2	5	3	3	1	1	1	1	1	3	2	4	1	Agree	3	2	4	2	4	4	2	3	2	4	2	4	3	2	3	2	4
34	2	Female	2	Single	1	College/University or Above	4	Blue Collar Worker	1	PHP 10,000 to 20,000	2	Urban	2	Region X	No	2	2	1	2	5	3	3	1	2	1	2	1	2	1	1	3	Agree	3	2	3	2	4	4	2	3	2	4	2	4	3	2	3	2	3
41	3	Male	1	Married	2	College/University or Above	4	Blue Collar Worker	1	PHP 10,000 to 20,000	2	Urban	2	NCR	No	2	2	1	2	5	3	5	2	2	1	2	1	4	2	4	3	Strongly Agree	4	2	4	2	4	4	2	3	2	4	2	4	4	2	4	2	3
35	2	Male	1	Single	1	College/University or Above	4	Professional/White Collar Worker	2	PHP 10,000 to 20,000	2	Urban	2	Region VI	No	2	2	1	2	5	3	4	2	1	1	3	2	4	2	4	2	Agree	3	2	4	2	4	4	2	4	2	4	2	4	3	2	3	2	4
23	1	Female	2	Single	1	College/University or Above	4	Self-employed	3	PHP 10,000 to 20,000	2	Urban	2	Region IV-A	No	2	2	1	2	5	3	4	2	1	1	2	1	3	2	1	3	Agree	3	2	4	2	4	4	2	4	2	4	2	4	3	2	3	2	4
39	2	Female	2	Married	2	College/University or Above	4	Self-employed	3	PHP 10,000 to 20,000	2	Urban	2	Region VII	No	2	2	1	2	5	3	4	2	3	2	3	2	3	2	1	2	Agree	3	2	3	2	3	3	2	3	2	3	2	3	3	2	3	2	3
26	1	Female	2	Single	1	College/University or Above	4	Professional/White Collar Worker	2	PHP 20,000 to 100,000	3	Urban	2	NCR	Yes	1	2	1	2	5	3	2	1	2	1	2	1	3	2	4	1	Agree	3	2	3	2	4	4	2	4	2	3	2	4	3	2	3	2	4
39	2	Male	1	Single	1	College/University or Above	4	Professional/White Collar Worker	2	PHP 20,000 to 100,000	3	Urban	2	NCR	No	2	2	1	2	5	3	2	1	1	1	1	1	3	2	4	1	Agree	3	2	4	2	4	4	2	4	2	4	2	4	3	2	3	2	4
35	2	Female	2	Single	1	College/University or Above	4	Self-employed	3	PHP 20,000 to 100,000	3	Urban	2	Region IV-A	No	2	2	1	2	5	3	3	1	1	1	1	1	3	2	4	3	Agree	3	2	4	2	4	4	2	3	2	4	2	4	3	2	4	2	4
49	3	Female	2	Married	2	College/University or Above	4	Self-employed	3	PHP 20,000 to 100,000	3	Urban	2	Region VII	No	2	2	1	2	5	3	3	1	1	1	1	1	3	2	4	1	Agree	3	2	3	2	3	4	2	3	2	4	2	4	3	2	3	2	4
54	4	Female	2	Married	2	College/University or Above	4	Housewife/Retired/Unemployed/Other	5	PHP 20,000 to 100,000	3	Urban	2	NCR	No	2	2	1	2	5	3	4	2	2	1	2	1	3	2	1	1	Agree	3	2	3	2	3	3	2	3	2	3	2	3	3	2	3	2	3
87	5	Female	2	Single	1	College/University or Above	4	Housewife/Retired/Unemployed/Other	5	PHP 100,000 or more	4	Urban	2	NCR	No	2	2	1	2	5	3	2	1	1	1	1	1	2	1	4	2	Agree	3	2	3	2	3	3	2	3	2	3	2	3	3	2	3	2	3
32	2	Female	2	Single	1	College/University or Above	4	Professional/White Collar Worker	2	PHP 20,000 to 100,000	3	Urban	2	NCR	Yes	1	1	2	2	5	3	3	1	2	1	3	2	3	2	1	2	Agree	3	2	4	2	4	4	2	3	2	4	2	4	3	2	3	2	4
35	2	Female	2	Married	2	College/University or Above	4	Housewife/Retired/Unemployed/Other	5	PHP 10,000 or less	1	Rural	1	Region VII	No	2	2	2	2	5	3	3	1	2	1	2	1	2	1	3	4	Agree	3	2	3	2	3	4	2	3	2	4	2	4	3	2	3	2	4
28	1	Female	2	Single	1	College/University or Above	4	Professional/White Collar Worker	2	PHP 10,000 to 20,000	2	Rural	1	Region III	No	2	2	2	2	5	3	1	1	1	1	2	1	4	2	4	1	Strongly Agree	4	2	4	2	4	4	2	3	2	4	2	4	3	2	3	2	4
40	2	Female	2	Married	2	College/University or Above	4	Professional/White Collar Worker	2	PHP 10,000 to 20,000	2	Rural	1	Region III	No	2	2	2	2	5	3	3	1	2	1	2	1	4	2	4	1	Strongly Agree	4	2	4	2	4	4	2	3	2	4	2	4	3	2	3	2	4
36	2	Female	2	Married	2	College/University or Above	4	Self-employed	3	PHP 100,000 or more	4	Rural	1	Region III	Yes	1	2	2	2	5	3	3	1	1	1	1	1	1	1	1	1	Agree	3	2	3	2	3	4	2	4	2	4	2	4	3	2	3	2	4
31	2	Male	1	Single	1	College/University or Above	4	Professional/White Collar Worker	2	PHP 20,000 to 100,000	3	Urban	2	Region III	No	2	2	2	2	5	3	5	2	3	2	3	2	4	2	4	3	Strongly Agree	4	2	3	2	3	4	2	4	2	4	2	4	3	2	3	2	4
37	2	Male	1	Married	2	College/University or Above	4	Professional/White Collar Worker	2	PHP 20,000 to 100,000	3	Urban	2	Region III	No	2	2	2	2	5	3	3	1	1	1	3	2	3	2	4	1	Agree	3	2	4	2	4	4	2	3	2	4	2	4	3	2	3	2	4
33	2	Female	2	Married	2	College/University or Above	4	Self-employed	3	PHP 20,000 to 100,000	3	Urban	2	NCR	No	2	2	2	2	5	3	3	1	2	1	2	1	2	1	1	3	Agree	3	2	3	2	4	4	2	4	2	4	2	4	3	2	3	2	4
19	1	Female	2	Single	1	College/University or Above	4	Student	4	PHP 100,000 or more	4	Urban	2	NCR	No	2	2	2	2	5	3	3	1	2	1	2	1	2	1	1	1	Agree	3	2	4	2	4	4	2	4	2	4	2	4	3	2	3	2	4
18	1	Male	1	Single	1	Junior High School	2	Student	4	PHP 10,000 or less	1	Urban	2	NCR	Yes	1	2	2	2	4	2	5	2	2	1	2	1	4	2	1	3	Agree	3	2	3	2	3	3	2	2	1	2	1	3	4	2	4	2	1
24	1	Female	2	Single	1	Junior High School	2	Student	4	PHP 10,000 or less	1	Rural	1	Region III	No	2	2	1	1	2	1	5	2	2	1	2	1	3	2	1	4	Strongly Agree	4	2	4	2	4	4	2	3	2	4	2	4	2	1	2	1	3
19	1	Male	1	Single	1	Junior High School	2	Student	4	PHP 10,000 or less	1	Urban	2	Region III	No	2	2	2	2	5	3	5	2	3	2	3	2	4	2	1	4	Agree	3	2	4	2	4	4	2	2	1	3	2	3	4	2	3	2	3
21	1	Female	2	Single	1	Junior High School	2	Professional/White Collar Worker	2	PHP 20,000 to 100,000	3	Urban	2	Region III	No	2	2	1	2	5	3	3	1	2	1	2	1	2	1	1	1	Disagree	2	1	3	2	2	3	2	2	1	3	2	3	2	1	3	2	3
18	1	Female	2	Single	1	Junior High School	2	Student	4	PHP 10,000 or less	1	Urban	2	NCR	No	2	2	1	2	3	1	3	1	2	1	2	1	2	1	1	2	Strongly Disagree	1	1	4	2	4	4	2	3	2	4	2	4	3	2	3	2	4
21	1	Male	1	Single	1	Senior High School	3	Student	4	PHP 20,000 to 100,000	3	Urban	2	NCR	No	2	2	1	2	5	3	5	2	4	2	4	2	4	2	1	6	Disagree	2	1	3	2	4	4	2	3	2	4	2	3	4	2	4	2	2
20	1	Female	2	Single	1	Senior High School	3	Student	4	PHP 100,000 or more	4	Urban	2	NCR	No	2	2	1	2	4	2	4	2	1	1	2	1	4	2	4	3	Strongly Agree	4	2	3	2	4	4	2	3	2	4	2	4	4	2	3	2	2
35	2	Female	2	Single	1	Senior High School	3	Blue Collar Worker	1	PHP 10,000 to 20,000	2	Rural	1	Region IV-A	No	2	2	1	2	3	1	4	2	3	2	3	2	3	2	1	1	Disagree	2	1	2	1	3	3	2	2	1	1	1	3	3	2	3	2	2
18	1	Female	2	Single	1	Senior High School	3	Student	4	PHP 10,000 or less	1	Urban	2	Region IV-A	No	2	2	1	2	4	2	4	2	2	1	3	2	4	2	4	3	Disagree	2	1	4	2	4	4	2	3	2	4	2	4	4	2	4	2	3
20	1	Female	2	Single	1	Senior High School	3	Student	4	PHP 10,000 or less	1	Urban	2	Region XIII	No	2	2	1	2	5	3	5	2	3	2	2	1	4	2	4	4	Agree	3	2	2	1	3	4	2	2	1	3	2	3	4	2	4	2	3
20	1	Female	2	Single	1	Senior High School	3	Student	4	PHP 10,000 or less	1	Urban	2	Region III	No	2	2	2	2	5	3	5	2	2	1	3	2	3	2	1	3	Disagree	2	1	3	2	3	3	2	2	1	3	2	3	4	2	4	2	3
19	1	Female	2	Single	1	Senior High School	3	Student	4	PHP 10,000 or less	1	Urban	2	NCR	No	2	2	1	2	5	3	5	2	2	1	3	2	3	2	1	3	Strongly Disagree	1	1	2	1	3	4	2	3	2	3	2	3	4	2	4	2	4
20	1	Female	2	Single	1	Senior High School	3	Student	4	PHP 10,000 or less	1	Urban	2	NCR	Yes	1	2	1	2	5	3	5	2	2	1	3	2	3	2	4	3	Agree	3	2	3	2	4	4	2	3	2	3	2	4	4	2	4	2	3
22	1	Female	2	Single	1	Senior High School	3	Student	4	PHP 10,000 or less	1	Urban	2	NCR	Yes	1	2	1	2	5	3	5	2	2	1	2	1	3	2	4	4	Agree	3	2	3	2	3	3	2	3	2	3	2	3	3	2	3	2	2
19	1	Male	1	Single	1	Senior High School	3	Student	4	PHP 10,000 or less	1	Urban	2	NCR	Yes	1	2	1	2	4	2	5	2	3	2	3	2	3	2	1	2	Disagree	2	1	3	2	3	4	2	2	1	2	1	3	3	2	3	2	2
19	1	Female	2	Single	1	Senior High School	3	Student	4	PHP 10,000 or less	1	Urban	2	NCR	Yes	1	2	1	2	5	3	3	1	2	1	2	1	2	1	1	3	Strongly Disagree	1	1	4	2	4	4	2	2	1	4	2	4	3	2	3	2	4
20	1	Male	1	Single	1	Senior High School	3	Student	4	PHP 10,000 or less	1	Urban	2	NCR	Yes	1	1	2	2	4	2	5	2	3	2	4	2	4	2	1	4	Disagree	2	1	1	1	3	3	2	3	2	2	1	3	4	2	4	2	2
20	1	Female	2	Single	1	Senior High School	3	Student	4	PHP 10,000 or less	1	Rural	1	Region II	No	2	2	1	2	4	2	4	2	2	1	3	2	3	2	1	2	Disagree	2	1	4	2	4	4	2	3	2	3	2	4	3	2	3	2	2
18	1	Female	2	Single	1	Senior High School	3	Student	4	PHP 10,000 or less	1	Urban	2	NCR	Yes	1	2	1	2	4	2	2	1	2	1	2	1	2	1	1	3	Strongly Disagree	1	1	3	2	4	4	2	2	1	3	2	4	2	1	2	1	4
20	1	Female	2	Single	1	Senior High School	3	Student	4	PHP 10,000 or less	1	Urban	2	NCR	No	2	2	1	2	4	2	5	2	1	1	2	1	3	2	4	3	Disagree	2	1	4	2	3	3	2	3	2	3	2	4	3	2	3	2	3
19	1	Female	2	Single	1	Senior High School	3	Student	4	PHP 10,000 or less	1	Rural	1	Region I	No	2	2	1	1	2	1	1	1	1	1	1	1	1	1	1	1	Disagree	2	1	4	2	4	3	2	4	2	4	2	4	2	1	2	1	4
18	1	Female	2	Single	1	Senior High School	3	Student	4	PHP 10,000 to 20,000	2	Urban	2	NCR	No	2	2	1	2	3	1	2	1	2	1	2	1	2	1	1	1	Strongly Disagree	1	1	3	2	3	4	2	4	2	4	2	4	3	2	2	1	4
18	1	Female	2	Single	1	Senior High School	3	Student	4	PHP 10,000 or less	1	Urban	2	NCR	Yes	1	2	2	2	4	2	5	2	2	1	3	2	3	2	1	2	Strongly Disagree	1	1	2	1	3	4	2	4	2	3	2	4	4	2	3	2	3
21	1	Female	2	Single	1	Senior High School	3	Student	4	PHP 10,000 or less	1	Urban	2	NCR	No	2	2	1	2	3	1	3	1	2	1	2	1	2	1	1	3	Disagree	2	1	3	2	4	4	2	4	2	3	2	4	3	2	3	2	3
20	1	Female	2	Single	1	Senior High School	3	Student	4	PHP 10,000 to 20,000	2	Urban	2	Region III	No	2	2	1	2	4	2	3	1	3	2	3	2	3	2	1	2	Strongly Agree	4	2	4	2	4	4	2	3	2	4	2	4	3	2	3	2	4
20	1	Male	1	Single	1	Senior High School	3	Student	4	PHP 20,000 to 100,000	3	Urban	2	Region III	No	2	2	1	2	4	2	5	2	2	1	3	2	3	2	4	3	Agree	3	2	3	2	4	4	2	3	2	4	2	4	3	2	3	2	3
18	1	Female	2	Single	1	Senior High School	3	Student	4	PHP 10,000 or less	1	Urban	2	NCR	No	2	2	1	2	5	3	4	2	3	2	3	2	3	2	1	3	Agree	3	2	4	2	4	4	2	3	2	3	2	4	3	2	3	2	4
25	1	Male	1	Single	1	Senior High School	3	Student	4	PHP 10,000 or less	1	Rural	1	Region III	No	2	2	1	2	5	3	4	2	1	1	2	1	3	2	1	4	Disagree	2	1	3	2	4	4	2	3	2	3	2	4	3	2	3	2	2
21	1	Male	1	Single	1	Senior High School	3	Student	4	PHP 10,000 or less	1	Urban	2	NCR	Yes	1	2	2	2	5	3	5	2	1	1	1	1	4	2	4	1	Agree	3	2	3	2	3	4	2	3	2	4	2	4	4	2	4	2	3
21	1	Female	2	Single	1	Senior High School	3	Student	4	PHP 10,000 or less	1	Urban	2	NCR	No	2	2	1	2	4	2	4	2	2	1	3	2	3	2	1	4	Strongly Disagree	1	1	3	2	4	4	2	2	1	3	2	4	4	2	4	2	3
22	1	Male	1	Single	1	Senior High School	3	Student	4	PHP 10,000 or less	1	Urban	2	NCR	Yes	1	2	1	2	5	3	5	2	1	1	3	2	3	2	4	3	Disagree	2	1	4	2	4	4	2	3	2	4	2	4	3	2	3	2	3
20	1	Female	2	Single	1	Senior High School	3	Student	4	PHP 10,000 or less	1	Urban	2	NCR	No	2	2	2	2	4	2	4	2	1	1	2	1	4	2	4	5	Disagree	2	1	3	2	4	4	2	2	1	3	2	4	4	2	4	2	4
18	1	Male	1	Single	1	Senior High School	3	Student	4	PHP 10,000 or less	1	Urban	2	NCR	Yes	1	2	2	2	5	3	5	2	4	2	4	2	4	2	1	4	Strongly Disagree	1	1	1	1	1	4	2	4	2	3	2	3	4	2	4	2	3
21	1	Male	1	Single	1	Senior High School	3	Student	4	PHP 10,000 to 20,000	2	Rural	1	Region IV-A	No	2	2	1	2	3	1	5	2	1	1	3	2	3	2	4	3	Disagree	2	1	4	2	4	4	2	3	2	4	2	4	4	2	4	2	4
20	1	Male	1	Single	1	Senior High School	3	Student	4	PHP 20,000 to 100,000	3	Urban	2	Region IV-A	No	2	2	1	2	3	1	3	1	1	1	2	1	4	2	1	3	Disagree	2	1	4	2	4	4	2	3	2	4	2	4	3	2	3	2	3
21	1	Female	2	Single	1	Senior High School	3	Student	4	PHP 10,000 or less	1	Urban	2	Region IV-A	No	2	2	2	2	4	2	5	2	2	1	2	1	3	2	4	3	Disagree	2	1	4	2	4	4	2	3	2	4	2	4	3	2	3	2	3
19	1	Female	2	Single	1	Senior High School	3	Student	4	PHP 10,000 or less	1	Urban	2	NCR	No	2	2	2	2	5	3	4	2	2	1	3	2	4	2	4	3	Disagree	2	1	4	2	4	4	2	4	2	4	2	4	3	2	3	2	3
19	1	Female	2	Single	1	Senior High School	3	Student	4	PHP 10,000 or less	1	Urban	2	Region IV-A	No	2	2	1	2	4	2	4	2	3	2	3	2	4	2	1	2	Disagree	2	1	3	2	4	4	2	3	2	3	2	4	4	2	3	2	2
21	1	Female	2	Single	1	Senior High School	3	Student	4	PHP 10,000 or less	1	Urban	2	Region III	No	2	2	1	2	4	2	4	2	2	1	3	2	3	2	1	2	Disagree	2	1	3	2	3	3	2	2	1	3	2	3	3	2	3	2	2
20	1	Female	2	Single	1	Senior High School	3	Student	4	PHP 100,000 or more	4	Urban	2	Region I	No	2	2	2	2	4	2	3	1	1	1	2	1	3	2	4	2	Disagree	2	1	4	2	4	4	2	3	2	4	2	4	3	2	2	1	2
21	1	Female	2	Single	1	Senior High School	3	Student	4	PHP 10,000 or less	1	Urban	2	NCR	No	2	2	1	2	4	2	5	2	2	1	2	1	3	2	4	3	Disagree	2	1	3	2	4	4	2	4	2	4	2	4	4	2	4	2	2
18	1	Female	2	Single	1	Senior High School	3	Student	4	PHP 10,000 or less	1	Urban	2	NCR	No	2	2	1	2	4	2	5	2	1	1	1	1	4	2	4	4	Agree	3	2	4	2	4	4	2	2	1	3	2	4	3	2	3	2	3
18	1	Male	1	Single	1	Senior High School	3	Student	4	PHP 10,000 or less	1	Rural	1	Region III	No	2	2	1	2	4	2	3	1	2	1	2	1	2	1	1	1	Disagree	2	1	4	2	4	4	2	3	2	4	2	4	4	2	3	2	3
19	1	Male	1	Single	1	Senior High School	3	Student	4	PHP 20,000 to 100,000	3	Urban	2	NCR	Yes	1	2	1	2	5	3	4	2	1	1	3	2	4	2	1	4	Disagree	2	1	4	2	4	4	2	3	2	4	2	4	4	2	3	2	4
21	1	Female	2	Single	1	Senior High School	3	Student	4	PHP 10,000 or less	1	Urban	2	NCR	No	2	2	1	2	4	2	3	1	1	1	3	2	3	2	4	3	Agree	3	2	4	2	4	4	2	3	2	4	2	4	4	2	4	2	3
19	1	Female	2	Single	1	Senior High School	3	Student	4	PHP 10,000 or less	1	Urban	2	Region IV-A	No	2	2	1	2	4	2	4	2	1	1	4	2	4	2	4	5	Disagree	2	1	3	2	3	4	2	4	2	1	1	4	4	2	4	2	1
20	1	Female	2	Single	1	Senior High School	3	Student	4	PHP 10,000 or less	1	Urban	2	NCR	Yes	1	2	1	2	4	2	3	1	1	1	1	1	3	2	4	3	Agree	3	2	4	2	4	4	2	4	2	4	2	4	3	2	2	1	4
21	1	Female	2	Single	1	Senior High School	3	Student	4	PHP 10,000 or less	1	Urban	2	NCR	No	2	2	2	2	4	2	3	1	2	1	2	1	2	1	1	2	Strongly Disagree	1	1	3	2	3	3	2	2	1	3	2	3	3	2	4	2	4
18	1	Female	2	Single	1	Senior High School	3	Student	4	PHP 10,000 or less	1	Urban	2	Region VII	No	2	2	1	2	5	3	4	2	3	2	2	1	2	1	1	3	Strongly Disagree	1	1	4	2	4	4	2	2	1	3	2	4	4	2	4	2	4
20	1	Female	2	Single	1	Senior High School	3	Student	4	PHP 20,000 to 100,000	3	Urban	2	Region III	No	2	2	2	2	4	2	3	1	2	1	2	1	3	2	4	1	Strongly Disagree	1	1	2	1	3	4	2	4	2	4	2	4	3	2	3	2	4
20	1	Female	2	Single	1	Senior High School	3	Student	4	PHP 10,000 or less	1	Rural	1	Region IV-A	No	2	2	1	2	3	1	3	1	2	1	3	2	3	2	4	3	Disagree	2	1	3	2	4	4	2	4	2	3	2	4	3	2	3	2	4
19	1	Female	2	Single	1	Senior High School	3	Student	4	PHP 10,000 or less	1	Urban	2	Region IV-A	No	2	2	1	2	4	2	4	2	3	2	3	2	3	2	1	2	Disagree	2	1	3	2	4	4	2	4	2	4	2	4	3	2	3	2	4
22	1	Female	2	Single	1	Senior High School	3	Student	4	PHP 10,000 or less	1	Urban	2	Region IV-A	No	2	2	1	2	4	2	4	2	1	1	2	1	3	2	1	3	Disagree	2	1	3	2	4	4	2	3	2	4	2	4	3	2	3	2	4
19	1	Male	1	Single	1	Senior High School	3	Student	4	PHP 10,000 or less	1	Urban	2	Region III	No	2	2	2	2	4	2	3	1	2	1	3	2	3	2	4	2	Disagree	2	1	3	2	4	4	2	3	2	3	2	4	3	2	3	2	3
22	1	Female	2	Single	1	Senior High School	3	Student	4	PHP 10,000 or less	1	Urban	2	NCR	No	2	2	2	2	4	2	5	2	1	1	2	1	4	2	4	3	Disagree	2	1	3	2	3	3	2	3	2	3	2	4	3	2	3	2	3
21	1	Female	2	Single	1	Senior High School	3	Student	4	PHP 100,000 or more	4	Urban	2	NCR	No	2	2	1	2	5	3	1	1	1	1	1	1	3	2	4	1	Disagree	2	1	4	2	4	4	2	4	2	4	2	4	3	2	3	2	4
18	1	Female	2	Single	1	Senior High School	3	Student	4	PHP 10,000 or less	1	Rural	1	Region IV-A	No	2	2	2	2	3	1	4	2	1	1	2	1	4	2	1	3	Strongly Agree	4	2	4	2	4	4	2	3	2	4	2	4	4	2	4	2	4
19	1	Female	2	Single	1	Senior High School	3	Student	4	PHP 10,000 or less	1	Urban	2	Region IV-A	No	2	2	2	2	4	2	5	2	2	1	3	2	3	2	1	3	Agree	3	2	4	2	4	4	2	3	2	4	2	4	3	2	3	2	3
19	1	Female	2	Single	1	Senior High School	3	Student	4	PHP 10,000 or less	1	Urban	2	NCR	No	2	2	1	2	4	2	5	2	2	1	3	2	4	2	4	4	Disagree	2	1	3	2	4	3	2	3	2	3	2	4	4	2	4	2	2
18	1	Female	2	Single	1	Senior High School	3	Student	4	PHP 10,000 or less	1	Urban	2	NCR	No	2	2	2	2	3	1	4	2	1	1	2	1	4	2	4	4	Disagree	2	1	3	2	4	4	2	3	2	3	2	4	4	2	4	2	2
20	1	Female	2	Single	1	Senior High School	3	Student	4	PHP 20,000 to 100,000	3	Rural	1	Region IV-A	No	2	2	1	2	5	3	4	2	2	1	4	2	4	2	4	3	Disagree	2	1	3	2	4	4	2	2	1	3	2	4	4	2	4	2	3
19	1	Male	1	Single	1	Senior High School	3	Student	4	PHP 20,000 to 100,000	3	Rural	1	Region IV-A	No	2	2	1	1	4	2	5	2	1	1	1	1	4	2	4	3	Strongly Agree	4	2	4	2	4	4	2	4	2	4	2	4	4	2	4	2	4
19	1	Female	2	Single	1	Senior High School	3	Student	4	PHP 10,000 or less	1	Urban	2	Region V	No	2	2	2	2	4	2	5	2	1	1	2	1	4	2	4	1	Agree	3	2	4	2	4	4	2	3	2	4	2	4	4	2	4	2	3
19	1	Female	2	Single	1	Senior High School	3	Student	4	PHP 10,000 or less	1	Urban	2	NCR	No	2	1	2	2	3	1	5	2	1	1	3	2	3	2	1	4	Disagree	2	1	3	2	3	4	2	3	2	3	2	4	4	2	4	2	3
21	1	Female	2	Single	1	Senior High School	3	Student	4	PHP 10,000 or less	1	Urban	2	NCR	No	2	2	1	2	4	2	5	2	2	1	2	1	3	2	1	4	Disagree	2	1	3	2	4	4	2	3	2	3	2	4	4	2	3	2	3
18	1	Female	2	Single	1	Senior High School	3	Student	4	PHP 100,000 or more	4	Urban	2	Region IV-A	No	2	2	1	2	5	3	5	2	3	2	3	2	3	2	1	3	Strongly Disagree	1	1	4	2	4	4	2	4	2	4	2	4	4	2	4	2	3
20	1	Female	2	Single	1	Senior High School	3	Student	4	PHP 10,000 or less	1	Urban	2	NCR	No	2	2	1	2	4	2	4	2	2	1	3	2	3	2	1	3	Agree	3	2	3	2	3	3	2	3	2	2	1	3	4	2	4	2	4
19	1	Female	2	Single	1	Senior High School	3	Student	4	PHP 10,000 or less	1	Urban	2	NCR	No	2	2	2	2	3	1	4	2	3	2	4	2	3	2	1	1	Disagree	2	1	3	2	3	3	2	2	1	4	2	4	3	2	4	2	4
21	1	Female	2	Single	1	Senior High School	3	Student	4	PHP 10,000 or less	1	Urban	2	NCR	No	2	2	1	2	3	1	5	2	1	1	2	1	3	2	4	2	Disagree	2	1	3	2	4	4	2	4	2	3	2	4	4	2	4	2	4
19	1	Female	2	Single	1	Senior High School	3	Student	4	PHP 10,000 or less	1	Rural	1	Region III	No	2	2	2	2	4	2	3	1	2	1	2	1	2	1	1	2	Disagree	2	1	3	2	3	3	2	3	2	3	2	3	3	2	3	2	3
20	1	Female	2	Single	1	Senior High School	3	Student	4	PHP 10,000 or less	1	Urban	2	NCR	No	2	2	1	1	2	1	3	1	2	1	2	1	3	2	1	4	Agree	3	2	4	2	4	4	2	4	2	4	2	4	3	2	3	2	3
19	1	Female	2	Single	1	Senior High School	3	Student	4	PHP 10,000 or less	1	Urban	2	NCR	Yes	1	2	1	2	4	2	5	2	1	1	3	2	4	2	4	1	Strongly Disagree	1	1	4	2	3	4	2	4	2	4	2	4	4	2	3	2	3
19	1	Male	1	Single	1	Senior High School	3	Student	4	PHP 10,000 or less	1	Rural	1	Region III	No	2	2	2	2	3	1	5	2	2	1	2	1	4	2	4	1	Strongly Disagree	1	1	3	2	4	4	2	2	1	3	2	4	4	2	4	2	2
20	1	Female	2	Single	1	Senior High School	3	Student	4	PHP 10,000 or less	1	Urban	2	Region III	No	2	2	1	2	4	2	4	2	2	1	3	2	3	2	4	2	Strongly Disagree	1	1	3	2	3	3	2	3	2	3	2	3	3	2	3	2	2
20	1	Female	2	Single	1	Senior High School	3	Student	4	PHP 20,000 to 100,000	3	Urban	2	NCR	No	2	2	1	2	5	3	5	2	1	1	2	1	4	2	4	3	Strongly Disagree	1	1	4	2	4	4	2	3	2	4	2	4	3	2	3	2	2
20	1	Male	1	Single	1	Senior High School	3	Student	4	PHP 10,000 or less	1	Rural	1	Region IV-A	No	2	1	1	2	5	3	5	2	1	1	3	2	4	2	1	1	Strongly Agree	4	2	4	2	4	4	2	4	2	4	2	4	4	2	1	1	3
18	1	Female	2	Single	1	Senior High School	3	Student	4	PHP 10,000 or less	1	Rural	1	Region I	No	2	2	1	2	4	2	4	2	3	2	3	2	3	2	1	1	Strongly Disagree	1	1	4	2	4	3	2	2	1	4	2	4	2	1	3	2	3
18	1	Male	1	Single	1	Senior High School	3	Student	4	PHP 20,000 to 100,000	3	Rural	1	Region IV-A	No	2	2	1	2	5	3	4	2	1	1	1	1	3	2	1	2	Strongly Disagree	1	1	3	2	4	4	2	4	2	4	2	4	3	2	3	2	3
19	1	Female	2	Single	1	Senior High School	3	Student	4	PHP 10,000 or less	1	Urban	2	NCR	No	2	2	1	2	4	2	4	2	1	1	3	2	4	2	4	2	Agree	3	2	4	2	4	4	2	4	2	4	2	4	4	2	4	2	4
20	1	Female	2	Single	1	Senior High School	3	Student	4	PHP 20,000 to 100,000	3	Urban	2	NCR	No	2	2	1	2	4	2	4	2	2	1	1	1	4	2	4	3	Strongly Disagree	1	1	4	2	4	4	2	2	1	4	2	4	4	2	4	2	2
21	1	Female	2	Single	1	Senior High School	3	Student	4	PHP 100,000 or more	4	Urban	2	NCR	No	2	2	1	2	4	2	5	2	2	1	2	1	4	2	4	2	Disagree	2	1	4	2	4	4	2	2	1	4	2	4	4	2	4	2	4
20	1	Female	2	Single	1	Senior High School	3	Student	4	PHP 20,000 to 100,000	3	Rural	1	Region IV-A	No	2	2	1	2	3	1	5	2	1	1	1	1	3	2	4	3	Agree	3	2	4	2	4	4	2	3	2	3	2	4	4	2	4	2	3
20	1	Female	2	Single	1	Senior High School	3	Student	4	PHP 10,000 or less	1	Urban	2	NCR	No	2	2	2	2	3	1	4	2	3	2	2	1	4	2	1	3	Disagree	2	1	4	2	4	3	2	3	2	4	2	4	4	2	3	2	2
19	1	Female	2	Single	1	Senior High School	3	Student	4	PHP 20,000 to 100,000	3	Urban	2	Region IV-A	No	2	2	1	2	4	2	4	2	2	1	2	1	3	2	4	3	Disagree	2	1	3	2	4	3	2	3	2	3	2	4	3	2	3	2	3
19	1	Female	2	Single	1	Senior High School	3	Student	4	PHP 10,000 or less	1	Urban	2	NCR	Yes	1	2	2	1	3	1	4	2	1	1	1	1	4	2	4	3	Strongly Disagree	1	1	2	1	4	4	2	3	2	4	2	4	3	2	3	2	3
18	1	Female	2	Single	1	Senior High School	3	Student	4	PHP 10,000 or less	1	Urban	2	Region III	No	2	2	1	2	5	3	4	2	3	2	2	1	2	1	1	3	Disagree	2	1	3	2	3	3	2	4	2	3	2	4	3	2	3	2	2
19	1	Female	2	Single	1	Senior High School	3	Student	4	PHP 10,000 or less	1	Urban	2	NCR	No	2	2	1	2	5	3	5	2	2	1	3	2	3	2	4	4	Disagree	2	1	4	2	4	4	2	3	2	4	2	4	2	1	2	1	2
22	1	Male	1	Single	1	Senior High School	3	Student	4	PHP 10,000 or less	1	Urban	2	NCR	Yes	1	2	1	2	5	3	3	1	1	1	4	2	4	2	1	3	Strongly Disagree	1	1	1	1	1	3	2	3	2	1	1	3	4	2	4	2	1
20	1	Female	2	Single	1	Senior High School	3	Student	4	PHP 10,000 or less	1	Urban	2	Region IV-A	No	2	2	1	2	3	1	4	2	1	1	1	1	3	2	4	3	Disagree	2	1	2	1	4	2	1	2	1	3	2	4	3	2	3	2	1
18	1	Female	2	Single	1	Senior High School	3	Student	4	PHP 20,000 to 100,000	3	Urban	2	Region III	No	2	2	1	2	4	2	2	1	1	1	1	1	3	2	4	1	Disagree	2	1	3	2	4	4	2	2	1	3	2	4	3	2	2	1	3
21	1	Female	2	Single	1	Senior High School	3	Student	4	PHP 10,000 or less	1	Urban	2	NCR	No	2	1	1	2	5	3	5	2	2	1	2	1	3	2	1	3	Disagree	2	1	2	1	4	4	2	3	2	2	1	4	3	2	3	2	3
20	1	Female	2	Single	1	Senior High School	3	Student	4	PHP 10,000 or less	1	Urban	2	NCR	No	2	2	1	2	4	2	5	2	2	1	2	1	3	2	4	2	Disagree	2	1	4	2	4	4	2	2	1	3	2	4	3	2	3	2	3
20	1	Female	2	Single	1	Senior High School	3	Student	4	PHP 10,000 or less	1	Urban	2	NCR	No	2	2	1	2	5	3	3	1	1	1	2	1	3	2	4	2	Strongly Disagree	1	1	4	2	4	4	2	2	1	4	2	4	3	2	3	2	3
20	1	Female	2	Single	1	Senior High School	3	Student	4	PHP 10,000 or less	1	Urban	2	NCR	Yes	1	2	1	2	3	1	5	2	2	1	3	2	4	2	1	3	Disagree	2	1	4	2	4	4	2	4	2	4	2	4	3	2	4	2	4
20	1	Female	2	Single	1	Senior High School	3	Student	4	PHP 10,000 or less	1	Rural	1	Region IV-A	No	2	2	1	2	4	2	4	2	1	1	2	1	3	2	4	1	Disagree	2	1	4	2	4	4	2	3	2	4	2	4	3	2	3	2	3
18	1	Female	2	Single	1	Senior High School	3	Student	4	PHP 20,000 to 100,000	3	Urban	2	Region IV-A	No	2	2	1	2	4	2	5	2	1	1	2	1	3	2	1	3	Disagree	2	1	4	2	4	4	2	3	2	4	2	4	3	2	3	2	3
20	1	Female	2	Single	1	Senior High School	3	Student	4	PHP 10,000 or less	1	Urban	2	NCR	No	2	2	2	2	4	2	4	2	2	1	3	2	3	2	1	2	Disagree	2	1	3	2	3	3	2	3	2	3	2	3	3	2	3	2	4
21	1	Male	1	Single	1	Senior High School	3	Student	4	PHP 10,000 or less	1	Urban	2	NCR	No	2	2	2	2	4	2	3	1	1	1	1	1	3	2	1	2	Disagree	2	1	4	2	3	4	2	4	2	4	2	4	3	2	3	2	3
18	1	Female	2	Single	1	Senior High School	3	Student	4	PHP 10,000 or less	1	Urban	2	NCR	No	2	2	2	2	5	3	3	1	2	1	2	1	3	2	4	2	Disagree	2	1	3	2	3	3	2	3	2	3	2	3	3	2	3	2	4
21	1	Female	2	Single	1	Senior High School	3	Student	4	PHP 10,000 or less	1	Urban	2	NCR	Yes	1	2	2	2	5	3	4	2	2	1	3	2	3	2	1	2	Disagree	2	1	3	2	3	4	2	3	2	4	2	4	4	2	4	2	3
21	1	Female	2	Single	1	Senior High School	3	Student	4	PHP 10,000 or less	1	Urban	2	NCR	No	2	2	2	2	4	2	4	2	1	1	2	1	3	2	1	3	Agree	3	2	4	2	4	4	2	3	2	4	2	4	3	2	3	2	3
19	1	Female	2	Single	1	Senior High School	3	Student	4	PHP 10,000 or less	1	Rural	1	Region IV-A	No	2	2	2	2	5	3	4	2	1	1	4	2	4	2	4	1	Strongly Disagree	1	1	3	2	3	3	2	2	1	3	2	3	3	2	3	2	2
18	1	Female	2	Single	1	Senior High School	3	Student	4	PHP 10,000 or less	1	Urban	2	Region VII	No	2	2	1	2	4	2	3	1	2	1	2	1	3	2	4	3	Strongly Disagree	1	1	4	2	4	4	2	3	2	4	2	4	3	2	2	1	4
21	1	Male	1	Single	1	Senior High School	3	Student	4	PHP 10,000 or less	1	Urban	2	NCR	No	2	2	1	2	4	2	4	2	2	1	3	2	3	2	1	3	Disagree	2	1	2	1	3	3	2	2	1	3	2	3	3	2	3	2	3
20	1	Male	1	Single	1	Senior High School	3	Student	4	PHP 10,000 or less	1	Urban	2	NCR	No	2	2	2	2	4	2	3	1	1	1	2	1	3	2	1	4	Disagree	2	1	4	2	4	4	2	3	2	4	2	4	3	2	4	2	4
18	1	Female	2	Single	1	Senior High School	3	Student	4	PHP 10,000 or less	1	Rural	1	Region III	No	2	2	1	2	5	3	2	1	2	1	2	1	2	1	1	2	Strongly Disagree	1	1	3	2	4	4	2	3	2	3	2	4	3	2	3	2	4
18	1	Female	2	Single	1	Senior High School	3	Student	4	PHP 10,000 or less	1	Urban	2	NCR	No	2	2	1	2	5	3	3	1	2	1	3	2	3	2	4	3	Disagree	2	1	4	2	4	4	2	3	2	4	2	4	3	2	3	2	4
19	1	Female	2	Single	1	Senior High School	3	Student	4	PHP 10,000 or less	1	Rural	1	Region IV-A	No	2	1	1	2	4	2	5	2	2	1	3	2	3	2	3	4	Disagree	2	1	3	2	3	4	2	3	2	3	2	3	4	2	3	2	4
20	1	Female	2	Single	1	Senior High School	3	Student	4	PHP 20,000 to 100,000	3	Urban	2	NCR	Yes	1	2	1	2	4	2	5	2	3	2	4	2	3	2	1	1	Strongly Disagree	1	1	4	2	4	4	2	4	2	4	2	4	3	2	4	2	3
20	1	Female	2	Single	1	Senior High School	3	Student	4	PHP 10,000 or less	1	Urban	2	Region III	No	2	2	2	2	4	2	2	1	1	1	1	1	1	1	1	3	Disagree	2	1	1	1	3	4	2	4	2	4	2	4	2	1	2	1	4
21	1	Female	2	Single	1	Senior High School	3	Student	4	PHP 10,000 or less	1	Urban	2	NCR	No	2	2	2	2	3	1	3	1	2	1	2	1	3	2	1	3	Disagree	2	1	4	2	4	4	2	3	2	4	2	4	2	1	2	1	3
20	1	Female	2	Single	1	Senior High School	3	Student	4	PHP 10,000 or less	1	Urban	2	NCR	No	2	2	1	2	3	1	4	2	1	1	2	1	4	2	4	2	Disagree	2	1	4	2	4	3	2	3	2	2	1	4	3	2	2	1	3
20	1	Female	2	Single	1	Senior High School	3	Student	4	PHP 10,000 or less	1	Urban	2	NCR	Yes	1	2	1	2	5	3	4	2	2	1	2	1	3	2	1	3	Disagree	2	1	4	2	4	2	1	2	1	3	2	4	3	2	2	1	3
21	1	Female	2	Single	1	Senior High School	3	Student	4	PHP 10,000 or less	1	Urban	2	NCR	Yes	1	2	2	2	5	3	3	1	2	1	2	1	2	1	4	3	Strongly Disagree	1	1	2	1	3	4	2	2	1	3	2	3	3	2	2	1	4
21	1	Female	2	Single	1	Senior High School	3	Student	4	PHP 10,000 or less	1	Rural	1	Region III	No	2	1	1	2	4	2	4	2	1	1	1	1	3	2	4	2	Strongly Disagree	1	1	3	2	3	3	2	2	1	3	2	4	3	2	2	1	4
18	1	Female	2	Single	1	Senior High School	3	Student	4	PHP 10,000 or less	1	Urban	2	NCR	No	2	2	1	2	4	2	3	1	1	1	3	2	4	2	4	2	Disagree	2	1	4	2	4	4	2	3	2	4	2	4	3	2	2	1	4
21	1	Female	2	Single	1	Senior High School	3	Student	4	PHP 10,000 or less	1	Urban	2	NCR	No	2	2	1	2	4	2	3	1	1	1	1	1	1	1	4	1	Disagree	2	1	4	2	4	4	2	3	2	4	2	4	3	2	2	1	4
20	1	Female	2	Single	1	Senior High School	3	Student	4	PHP 10,000 or less	1	Urban	2	NCR	No	2	2	1	2	4	2	4	2	1	1	2	1	3	2	4	3	Strongly Disagree	1	1	3	2	3	3	2	2	1	3	2	3	2	1	3	2	3
20	1	Male	1	Single	1	Senior High School	3	Student	4	PHP 10,000 or less	1	Urban	2	NCR	No	2	2	2	2	4	2	4	2	2	1	3	2	3	2	1	2	Disagree	2	1	2	1	3	3	2	3	2	3	2	4	2	1	3	2	3
18	1	Male	1	Single	1	Senior High School	3	Student	4	PHP 10,000 or less	1	Urban	2	NCR	No	2	1	1	2	4	2	4	2	1	1	2	1	3	2	1	3	Disagree	2	1	2	1	4	4	2	2	1	2	1	4	4	2	4	2	3
19	1	Female	2	Single	1	Senior High School	3	Student	4	PHP 10,000 or less	1	Rural	1	Region IV-B	No	2	2	2	2	5	3	4	2	1	1	3	2	3	2	4	4	Disagree	2	1	2	1	2	3	2	2	1	3	2	4	3	2	3	2	4
20	1	Female	2	Single	1	Senior High School	3	Student	4	PHP 10,000 or less	1	Rural	1	Region IV-A	No	2	2	1	2	4	2	5	2	1	1	2	1	3	2	4	3	Strongly Disagree	1	1	3	2	4	4	2	2	1	4	2	4	4	2	4	2	4
18	1	Female	2	Single	1	Senior High School	3	Student	4	PHP 10,000 or less	1	Urban	2	NCR	No	2	2	1	2	4	2	3	1	1	1	3	2	3	2	4	1	Strongly Disagree	1	1	4	2	4	4	2	1	1	4	2	4	3	2	3	2	4
21	1	Female	2	Single	1	Senior High School	3	Student	4	PHP 10,000 or less	1	Urban	2	Region I	No	2	2	1	2	4	2	3	1	1	1	3	2	4	2	4	3	Disagree	2	1	3	2	3	3	2	2	1	3	2	3	3	2	3	2	3
21	1	Female	2	Single	1	Senior High School	3	Student	4	PHP 10,000 or less	1	Urban	2	Region III	No	2	2	1	2	4	2	4	2	1	1	1	1	3	2	1	3	Disagree	2	1	3	2	3	4	2	2	1	3	2	3	4	2	3	2	3
25	1	Female	2	Single	1	Senior High School	3	Professional/White Collar Worker	2	PHP 20,000 to 100,000	3	Urban	2	Region III	No	2	2	1	2	4	2	4	2	1	1	2	1	3	2	1	1	Strongly Disagree	1	1	4	2	4	4	2	2	1	4	2	4	3	2	4	2	3
19	1	Male	1	Single	1	Senior High School	3	Student	4	PHP 10,000 or less	1	Rural	1	Region III	No	2	2	2	2	4	2	5	2	2	1	2	1	3	2	4	2	Strongly Disagree	1	1	3	2	4	4	2	2	1	4	2	4	4	2	4	2	4
20	1	Female	2	Single	1	Senior High School	3	Student	4	PHP 10,000 or less	1	Urban	2	Region IV-A	Yes	1	2	1	2	5	3	3	1	1	1	2	1	3	2	1	2	Strongly Disagree	1	1	4	2	4	4	2	1	1	4	2	4	3	2	3	2	4
18	1	Female	2	Single	1	Senior High School	3	Student	4	PHP 20,000 to 100,000	3	Urban	2	NCR	No	2	2	1	2	5	3	3	1	2	1	2	1	2	1	1	2	Strongly Disagree	1	1	4	2	4	4	2	2	1	3	2	3	3	2	3	2	4
20	1	Female	2	Single	1	Senior High School	3	Student	4	PHP 10,000 or less	1	Urban	2	NCR	Yes	1	2	2	2	5	3	4	2	1	1	3	2	3	2	4	2	Strongly Disagree	1	1	3	2	3	4	2	2	1	4	2	4	4	2	4	2	4
21	1	Male	1	Single	1	Senior High School	3	Student	4	PHP 10,000 or less	1	Urban	2	Region III	No	2	2	1	2	4	2	5	2	1	1	2	1	4	2	1	1	Agree	3	2	3	2	3	3	2	2	1	4	2	4	3	2	4	2	3
18	1	Female	2	Single	1	Senior High School	3	Student	4	PHP 10,000 to 20,000	2	Rural	1	Region IV-A	No	2	2	1	2	5	3	1	1	2	1	2	1	2	1	1	2	Strongly Agree	4	2	3	2	3	4	2	2	1	4	2	4	4	2	3	2	4
21	1	Female	2	Single	1	Senior High School	3	Student	4	PHP 10,000 or less	1	Urban	2	NCR	Yes	1	2	1	2	4	2	4	2	2	1	2	1	3	2	1	1	Strongly Disagree	1	1	2	1	3	3	2	3	2	3	2	3	3	2	3	2	3
19	1	Female	2	Single	1	Senior High School	3	Student	4	PHP 10,000 or less	1	Rural	1	Region III	No	2	2	1	2	3	1	5	2	1	1	2	1	3	2	4	3	Disagree	2	1	3	2	4	4	2	4	2	4	2	4	4	2	4	2	4
20	1	Female	2	Single	1	Senior High School	3	Student	4	PHP 10,000 or less	1	Rural	1	Region III	No	2	2	1	2	3	1	4	2	2	1	2	1	3	2	4	2	Disagree	2	1	4	2	4	4	2	4	2	4	2	4	4	2	4	2	3
21	1	Female	2	Single	1	Senior High School	3	Student	4	PHP 10,000 or less	1	Rural	1	Region VI	No	2	2	1	2	3	1	4	2	2	1	2	1	3	2	4	1	Strongly Disagree	1	1	3	2	4	4	2	3	2	4	2	4	3	2	3	2	4
21	1	Male	1	Single	1	Senior High School	3	Student	4	PHP 10,000 or less	1	Urban	2	Region III	No	2	2	1	2	3	1	3	1	1	1	1	1	1	1	1	4	Disagree	2	1	3	2	4	4	2	4	2	4	2	4	4	2	4	2	3
21	1	Female	2	Single	1	Senior High School	3	Student	4	PHP 10,000 or less	1	Urban	2	NCR	No	2	2	1	2	3	1	4	2	1	1	1	1	3	2	4	3	Disagree	2	1	4	2	4	4	2	4	2	4	2	4	3	2	3	2	4
21	1	Male	1	Single	1	Senior High School	3	Student	4	PHP 10,000 or less	1	Urban	2	Region IX	No	2	2	2	2	3	1	5	2	2	1	2	1	3	2	4	3	Strongly Disagree	1	1	3	2	3	3	2	3	2	3	2	3	4	2	4	2	4
20	1	Male	1	Single	1	Senior High School	3	Student	4	PHP 10,000 or less	1	Rural	1	Region IV-A	No	2	2	1	2	4	2	3	1	1	1	2	1	4	2	4	3	Disagree	2	1	4	2	4	4	2	3	2	4	2	4	4	2	4	2	4
21	1	Female	2	Single	1	Senior High School	3	Student	4	PHP 10,000 or less	1	Rural	1	Region I	No	2	2	1	2	4	2	3	1	2	1	2	1	2	1	1	1	Disagree	2	1	4	2	4	4	2	4	2	4	2	4	3	2	3	2	4
18	1	Female	2	Single	1	Senior High School	3	Student	4	PHP 10,000 or less	1	Urban	2	NCR	No	2	2	1	2	4	2	4	2	2	1	3	2	3	2	1	3	Disagree	2	1	4	2	4	4	2	4	2	4	2	4	3	2	3	2	3
20	1	Female	2	Single	1	Senior High School	3	Student	4	PHP 10,000 or less	1	Urban	2	Region IV-A	No	2	2	1	2	4	2	4	2	2	1	2	1	2	1	1	3	Disagree	2	1	3	2	3	4	2	4	2	3	2	3	3	2	3	2	4
21	1	Female	2	Single	1	Senior High School	3	Student	4	PHP 10,000 or less	1	Urban	2	NCR	No	2	2	1	2	4	2	3	1	2	1	3	2	3	2	1	2	Disagree	2	1	4	2	4	4	2	4	2	4	2	4	3	2	3	2	4
19	1	Female	2	Single	1	Senior High School	3	Student	4	PHP 20,000 to 100,000	3	Urban	2	NCR	No	2	2	1	2	4	2	3	1	1	1	3	2	3	2	1	3	Disagree	2	1	4	2	4	4	2	3	2	4	2	4	3	2	3	2	4
18	1	Female	2	Single	1	Senior High School	3	Student	4	PHP 10,000 or less	1	Urban	2	NCR	Yes	1	2	2	2	4	2	3	1	2	1	3	2	3	2	1	3	Strongly Disagree	1	1	4	2	4	4	2	3	2	4	2	4	3	2	3	2	4
18	1	Male	1	Single	1	Senior High School	3	Student	4	PHP 20,000 to 100,000	3	Rural	1	Region III	No	2	2	1	2	5	3	5	2	3	2	3	2	3	2	1	3	Strongly Disagree	1	1	3	2	4	4	2	3	2	4	2	4	3	2	3	2	3
18	1	Female	2	Single	1	Senior High School	3	Student	4	PHP 10,000 or less	1	Urban	2	Region III	No	2	2	1	2	5	3	3	1	1	1	1	1	4	2	4	1	Disagree	2	1	3	2	4	4	2	4	2	4	2	4	3	2	3	2	4
21	1	Female	2	Single	1	Senior High School	3	Student	4	PHP 10,000 or less	1	Urban	2	NCR	No	2	2	1	2	5	3	3	1	1	1	2	1	3	2	1	1	Disagree	2	1	4	2	4	4	2	4	2	4	2	4	3	2	4	2	4
19	1	Male	1	Single	1	Senior High School	3	Student	4	PHP 100,000 or more	4	Urban	2	Region III	No	2	2	1	2	5	3	4	2	2	1	2	1	3	2	4	3	Disagree	2	1	4	2	4	4	2	3	2	4	2	4	4	2	4	2	4
18	1	Female	2	Single	1	Senior High School	3	Student	4	PHP 10,000 or less	1	Urban	2	Region IV-A	Yes	1	2	2	2	5	3	3	1	3	2	2	1	3	2	1	3	Disagree	2	1	4	2	4	4	2	4	2	4	2	4	4	2	4	2	4
19	1	Female	2	Single	1	Senior High School	3	Student	4	PHP 10,000 to 20,000	2	Urban	2	Region VI	No	2	2	2	2	5	3	3	1	1	1	3	2	3	2	1	3	Disagree	2	1	3	2	3	4	2	4	2	3	2	4	3	2	3	2	4
21	1	Male	1	Single	1	Senior High School	3	Student	4	PHP 10,000 or less	1	Rural	1	Region III	Yes	1	2	1	1	3	1	4	2	2	1	3	2	3	2	1	4	Agree	3	2	3	2	3	3	2	3	2	3	2	4	3	2	3	2	3
25	1	Female	2	Single	1	Senior High School	3	Student	4	PHP 20,000 to 100,000	3	Urban	2	Region IV-A	No	2	2	2	1	2	1	5	2	2	1	2	1	3	2	1	3	Agree	3	2	4	2	4	4	2	4	2	4	2	4	4	2	4	2	3
18	1	Female	2	Single	1	Senior High School	3	Student	4	PHP 10,000 or less	1	Urban	2	NCR	No	2	2	1	2	3	1	5	2	1	1	3	2	4	2	1	4	Agree	3	2	4	2	4	4	2	3	2	4	2	4	4	2	4	2	4
20	1	Female	2	Single	1	Senior High School	3	Student	4	PHP 10,000 or less	1	Urban	2	Region III	No	2	2	1	2	3	1	5	2	3	2	4	2	4	2	4	3	Agree	3	2	4	2	4	4	2	3	2	4	2	4	3	2	3	2	3
20	1	Male	1	Single	1	Senior High School	3	Student	4	PHP 10,000 or less	1	Urban	2	Region IV-A	No	2	2	1	2	3	1	4	2	2	1	2	1	3	2	1	2	Agree	3	2	4	2	4	4	2	3	2	4	2	4	3	2	3	2	3
20	1	Female	2	Single	1	Senior High School	3	Student	4	PHP 10,000 or less	1	Urban	2	NCR	No	2	2	1	2	4	2	4	2	2	1	2	1	3	2	4	3	Agree	3	2	4	2	4	4	2	4	2	4	2	4	4	2	4	2	4
19	1	Male	1	Single	1	Senior High School	3	Professional/White Collar Worker	2	PHP 10,000 to 20,000	2	Urban	2	NCR	No	2	2	1	2	4	2	5	2	1	1	1	1	4	2	1	1	Agree	3	2	4	2	4	4	2	4	2	4	2	4	4	2	4	2	3
18	1	Male	1	Single	1	Senior High School	3	Student	4	PHP 10,000 or less	1	Rural	1	Region II	No	2	2	2	2	4	2	4	2	1	1	2	1	3	2	4	1	Agree	3	2	3	2	3	4	2	4	2	4	2	4	3	2	3	2	3
19	1	Male	1	Single	1	Senior High School	3	Student	4	PHP 10,000 or less	1	Rural	1	Region I	No	2	2	2	2	4	2	4	2	2	1	3	2	3	2	4	3	Agree	3	2	3	2	4	3	2	3	2	3	2	4	3	2	3	2	4
19	1	Female	2	Single	1	Senior High School	3	Student	4	PHP 10,000 or less	1	Urban	2	NCR	No	2	2	2	2	4	2	3	1	2	1	3	2	4	2	1	3	Agree	3	2	3	2	4	4	2	4	2	4	2	4	3	2	4	2	4
19	1	Female	2	Single	1	Senior High School	3	Student	4	PHP 10,000 or less	1	Urban	2	NCR	Yes	1	2	2	2	4	2	3	1	2	1	2	1	3	2	4	5	Agree	3	2	4	2	4	4	2	4	2	4	2	4	3	2	3	2	4
21	1	Female	2	Single	1	Senior High School	3	Student	4	PHP 10,000 or less	1	Urban	2	Region IV-A	No	2	2	2	2	4	2	4	2	2	1	3	2	4	2	4	3	Agree	3	2	4	2	4	3	2	3	2	3	2	4	3	2	3	2	4
42	3	Female	2	Married	2	College/University or Above	4	Professional/White Collar Worker	2	PHP 20,000 to 100,000	3	Rural	1	Region VIII	No	2	2	2	2	5	3	4	2	3	2	3	2	3	2	1	3	Strongly Disagree	1	1	3	2	3	4	2	3	2	4	2	3	4	2	4	2	2
56	4	Female	2	Married	2	College/University or Above	4	Self-employed	3	PHP 20,000 to 100,000	3	Urban	2	NCR	No	2	2	1	2	4	2	5	2	1	1	1	1	4	2	4	1	Agree	3	2	3	2	4	4	2	4	2	4	2	4	4	2	4	2	2
54	4	Male	1	Married	2	College/University or Above	4	Self-employed	3	PHP 100,000 or more	4	Urban	2	Region III	No	2	2	2	1	5	3	5	2	3	2	3	2	3	2	1	2	Disagree	2	1	2	1	3	3	2	2	1	3	2	2	3	2	3	2	2
74	5	Female	2	Single	1	College/University or Above	4	Professional/White Collar Worker	2	PHP 100,000 or more	4	Urban	2	NCR	No	2	2	1	1	4	2	5	2	3	2	3	2	4	2	4	3	Strongly Disagree	1	1	1	1	1	3	2	1	1	2	1	1	4	2	4	2	2
66	5	Male	1	Single	1	College/University or Above	4	Self-employed	3	PHP 20,000 to 100,000	3	Urban	2	NCR	Yes	1	2	1	2	5	3	5	2	1	1	1	1	4	2	4	1	Strongly Disagree	1	1	2	1	2	4	2	1	1	3	2	3	4	2	4	2	1
45	3	Male	1	Single	1	College/University or Above	4	Housewife/Retired/Unemployed/Other	5	PHP 10,000 to 20,000	2	Urban	2	NCR	No	2	2	1	1	3	1	5	2	4	2	4	2	3	2	1	3	Disagree	2	1	3	2	3	4	2	2	1	3	2	3	3	2	3	2	2
72	5	Female	2	Married	2	College/University or Above	4	Housewife/Retired/Unemployed/Other	5	PHP 20,000 to 100,000	3	Urban	2	NCR	No	2	2	1	2	4	2	5	2	3	2	3	2	4	2	4	5	Strongly Agree	4	2	3	2	3	4	2	2	1	4	2	4	4	2	4	2	2
44	3	Female	2	Single	1	College/University or Above	4	Professional/White Collar Worker	2	PHP 10,000 to 20,000	2	Urban	2	Region VII	No	2	2	1	1	5	3	5	2	4	2	4	2	3	2	2	2	Agree	3	2	4	2	4	4	2	3	2	4	2	4	4	2	4	2	2
48	3	Male	1	Single	1	College/University or Above	4	Professional/White Collar Worker	2	PHP 10,000 to 20,000	2	Urban	2	NCR	Yes	1	2	1	2	3	1	5	2	2	1	2	1	3	2	4	1	Disagree	2	1	3	2	4	4	2	2	1	4	2	4	4	2	4	2	3
58	4	Female	2	Single	1	College/University or Above	4	Professional/White Collar Worker	2	PHP 100,000 or more	4	Urban	2	Region VI	No	2	1	1	2	4	2	5	2	1	1	1	1	4	2	4	2	Disagree	2	1	4	2	4	4	2	3	2	4	2	4	4	2	4	2	3
19	1	Female	2	Single	1	College/University or Above	4	Student	4	PHP 10,000 or less	1	Urban	2	NCR	No	2	2	1	2	4	2	4	2	2	1	3	2	3	2	4	3	Disagree	2	1	3	2	4	4	2	3	2	3	2	4	3	2	2	1	3
24	1	Female	2	Single	1	College/University or Above	4	Housewife/Retired/Unemployed/Other	5	PHP 10,000 or less	1	Rural	1	Region III	No	2	2	1	2	4	2	4	2	2	1	2	1	3	2	4	3	Agree	3	2	4	2	4	4	2	2	1	3	2	4	4	2	4	2	2
58	4	Female	2	Married	2	College/University or Above	4	Professional/White Collar Worker	2	PHP 20,000 to 100,000	3	Urban	2	NCR	Yes	1	2	1	2	4	2	5	2	2	1	2	1	3	2	4	1	Strongly Disagree	1	1	2	1	3	4	2	3	2	4	2	2	3	2	3	2	3
59	4	Female	2	Married	2	College/University or Above	4	Self-employed	3	PHP 100,000 or more	4	Urban	2	Region IV-A	No	2	2	1	2	4	2	5	2	2	1	3	2	3	2	4	1	Agree	3	2	3	2	3	4	2	3	2	3	2	3	4	2	4	2	3
44	3	Male	1	Single	1	College/University or Above	4	Self-employed	3	PHP 10,000 or less	1	Urban	2	NCR	No	2	2	1	1	3	1	4	2	1	1	1	1	3	2	4	3	Disagree	2	1	3	2	3	4	2	3	2	3	2	4	3	2	3	2	2
56	4	Male	1	Married	2	College/University or Above	4	Housewife/Retired/Unemployed/Other	5	PHP 10,000 or less	1	Urban	2	Region III	No	2	2	2	1	4	2	5	2	1	1	2	1	4	2	4	3	Disagree	2	1	3	2	3	3	2	3	2	3	2	3	3	2	3	2	2
49	3	Female	2	Married	2	College/University or Above	4	Professional/White Collar Worker	2	PHP 20,000 to 100,000	3	Rural	1	Region IV-A	No	2	2	1	2	5	3	5	2	3	2	3	2	4	2	4	1	Strongly Disagree	1	1	3	2	3	3	2	3	2	3	2	3	3	2	3	2	2
42	3	Male	1	Married	2	College/University or Above	4	Professional/White Collar Worker	2	PHP 20,000 to 100,000	3	Urban	2	Region VI	No	2	2	1	1	4	2	5	2	3	2	3	2	3	2	1	1	Agree	3	2	3	2	3	3	2	3	2	3	2	3	3	2	3	2	2
64	5	Female	2	Married	2	College/University or Above	4	Professional/White Collar Worker	2	PHP 100,000 or more	4	Urban	2	Region IV-A	No	2	2	1	1	4	2	4	2	1	1	2	1	3	2	4	1	Strongly Disagree	1	1	3	2	3	4	2	1	1	3	2	3	3	2	3	2	3
62	5	Male	1	Married	2	College/University or Above	4	Self-employed	3	PHP 20,000 to 100,000	3	Urban	2	NCR	Yes	1	2	1	2	5	3	3	1	2	1	3	2	3	2	4	1	Disagree	2	1	3	2	3	4	2	2	1	3	2	3	3	2	3	2	3
67	5	Female	2	Married	2	College/University or Above	4	Self-employed	3	PHP 100,000 or more	4	Urban	2	Region III	No	2	2	1	1	4	2	4	2	2	1	2	1	3	2	4	4	Disagree	2	1	2	1	3	3	2	3	2	4	2	3	3	2	3	2	3
26	1	Male	1	Single	1	College/University or Above	4	Professional/White Collar Worker	2	PHP 10,000 to 20,000	2	Rural	1	Region VII	No	2	2	1	2	5	3	5	2	2	1	4	2	4	2	4	3	Strongly Disagree	1	1	3	2	3	4	2	4	2	3	2	3	4	2	4	2	3
62	5	Female	2	Single	1	College/University or Above	4	Self-employed	3	PHP 20,000 to 100,000	3	Urban	2	NCR	No	2	2	1	1	4	2	5	2	2	1	2	1	4	2	4	3	Agree	3	2	3	2	3	4	2	4	2	3	2	3	3	2	3	2	3
75	5	Male	1	Married	2	College/University or Above	4	Housewife/Retired/Unemployed/Other	5	PHP 100,000 or more	4	Urban	2		No	2	2	1	2	4	2	5	2	2	1	2	1	4	2	4	4	Agree	3	2	4	2	4	4	2	4	2	4	2	4	4	2	4	2	3
35	2	Female	2	Married	2	College/University or Above	4	Professional/White Collar Worker	2	PHP 20,000 to 100,000	3	Urban	2	Region X	No	2	2	1	2	4	2	4	2	2	1	3	2	3	2	4	3	Disagree	2	1	3	2	4	4	2	3	2	3	2	4	3	2	3	2	2
61	5	Female	2	Married	2	College/University or Above	4	Self-employed	3	PHP 100,000 or more	4	Urban	2	NCR	No	2	1	1	2	5	3	5	2	2	1	2	1	3	2	4	1	Disagree	2	1	2	1	3	4	2	2	1	3	2	3	3	2	3	2	3
26	1	Female	2	Single	1	College/University or Above	4	Professional/White Collar Worker	2	PHP 20,000 to 100,000	3	Urban	2	NCR	No	2	1	1	2	4	2	5	2	2	1	3	2	3	2	1	4	Strongly Agree	4	2	2	1	4	3	2	2	1	1	1	4	4	2	4	2	2
19	1	Female	2	Single	1	College/University or Above	4	Student	4	PHP 10,000 or less	1	Urban	2	Region VIII	No	2	2	1	2	4	2	5	2	2	1	2	1	4	2	1	3	Agree	3	2	3	2	4	3	2	2	1	3	2	4	3	2	3	2	2
65	5	Male	1	Married	2	College/University or Above	4	Self-employed	3	PHP 20,000 to 100,000	3	Urban	2	Region X	No	2	2	1	2	4	2	5	2	2	1	2	1	4	2	4	2	Disagree	2	1	3	2	3	4	2	3	2	4	2	4	3	2	3	2	2
25	1	Male	1	Single	1	College/University or Above	4	Student	4	PHP 10,000 or less	1	Urban	2	NCR	Yes	1	2	2	2	3	1	5	2	2	1	2	1	4	2	4	1	Strongly Agree	4	2	4	2	4	4	2	4	2	4	2	4	3	2	3	2	2
26	1	Female	2	Single	1	College/University or Above	4	Professional/White Collar Worker	2	PHP 20,000 to 100,000	3	Urban	2	NCR	Yes	1	2	2	2	3	1	5	2	1	1	1	1	3	2	4	1	Disagree	2	1	4	2	4	3	2	2	1	4	2	4	4	2	4	2	4
21	1	Female	2	Single	1	College/University or Above	4	Professional/White Collar Worker	2	PHP 10,000 to 20,000	2	Urban	2	Region IV-A	No	2	2	2	2	4	2	5	2	1	1	2	1	3	2	1	2	Disagree	2	1	4	2	4	4	2	3	2	4	2	4	3	2	3	2	3
20	1	Female	2	Single	1	College/University or Above	4	Student	4	PHP 10,000 or less	1	Urban	2	Region IV-A	No	2	2	1	2	5	3	5	2	2	1	2	1	4	2	4	1	Strongly Disagree	1	1	3	2	3	4	2	4	2	4	2	4	4	2	4	2	3
18	1	Male	1	Single	1	College/University or Above	4	Student	4	PHP 10,000 or less	1	Urban	2	Region IV-A	No	2	2	1	2	3	1	5	2	1	1	3	2	4	2	4	4	Agree	3	2	4	2	4	4	2	4	2	4	2	4	4	2	4	2	4
71	5	Female	2	Married	2	College/University or Above	4	Housewife/Retired/Unemployed/Other	5	PHP 10,000 to 20,000	2	Urban	2	NCR	No	2	2	1	1	3	1	4	2	1	1	2	1	3	2	4	1	Disagree	2	1	2	1	2	4	2	4	2	4	2	3	3	2	3	2	3
20	1	Male	1	Single	1	College/University or Above	4	Student	4	PHP 10,000 or less	1	Urban	2	NCR	No	2	2	1	2	4	2	5	2	2	1	3	2	4	2	4	4	Disagree	2	1	3	2	4	3	2	2	1	3	2	4	4	2	4	2	3
71	5	Male	1	Single	1	College/University or Above	4	Professional/White Collar Worker	2	PHP 20,000 to 100,000	3	Urban	2	NCR	No	2	2	2	1	4	2	5	2	1	1	1	1	3	2	1	3	Strongly Disagree	1	1	3	2	3	4	2	4	2	4	2	4	4	2	4	2	3
65	5	Male	1	Married	2	College/University or Above	4	Professional/White Collar Worker	2	PHP 100,000 or more	4	Urban	2	NCR	Yes	1	2	1	2	5	3	5	2	2	1	2	1	3	2	4	2	Disagree	2	1	4	2	4	3	2	3	2	4	2	4	3	2	3	2	3
23	1	Female	2	Single	1	College/University or Above	4	Professional/White Collar Worker	2	PHP 20,000 to 100,000	3	Rural	1	Region III	No	2	2	1	2	4	2	5	2	1	1	2	1	4	2	1	1	Agree	3	2	4	2	4	4	2	4	2	4	2	4	4	2	4	2	3
68	5	Male	1	Married	2	College/University or Above	4	Housewife/Retired/Unemployed/Other	5	PHP 20,000 to 100,000	3	Urban	2	Region V	No	2	2	1	1	3	1	5	2	1	1	3	2	4	2	4	3	Agree	3	2	3	2	3	4	2	2	1	2	1	3	3	2	3	2	3
59	4	Male	1	Married	2	College/University or Above	4	Self-employed	3	PHP 100,000 or more	4	Urban	2	Region VII	No	2	2	1	1	5	3	5	2	1	1	1	1	3	2	4	3	Disagree	2	1	3	2	4	4	2	4	2	4	2	4	4	2	4	2	3
43	3	Male	1	Married	2	College/University or Above	4	Professional/White Collar Worker	2	PHP 20,000 to 100,000	3	Urban	2	Region VII	No	2	2	1	2	4	2	5	2	3	2	3	2	3	2	1	4	Disagree	2	1	3	2	4	4	2	2	1	2	1	4	4	2	4	2	3
57	4	Female	2	Married	2	College/University or Above	4	Professional/White Collar Worker	2	PHP 100,000 or more	4	Urban	2	Region VII	No	2	2	1	1	4	2	5	2	1	1	2	1	4	2	4	1	Agree	3	2	4	2	4	4	2	4	2	4	2	4	4	2	4	2	3
22	1	Male	1	Single	1	College/University or Above	4	Student	4	PHP 20,000 to 100,000	3	Urban	2	NCR	No	2	2	1	2	5	3	5	2	2	1	3	2	4	2	4	5	Agree	3	2	4	2	4	4	2	4	2	4	2	4	4	2	4	2	4
59	4	Female	2	Married	2	College/University or Above	4	Professional/White Collar Worker	2	PHP 100,000 or more	4	Urban	2	NCR	No	2	2	1	2	5	3	5	2	3	2	2	1	4	2	1	1	Agree	3	2	2	1	2	3	2	2	1	3	2	3	4	2	4	2	3
40	2	Female	2	Single	1	College/University or Above	4	Self-employed	3	PHP 20,000 to 100,000	3	Urban	2	NCR	Yes	1	2	1	2	4	2	4	2	3	2	3	2	3	2	2	4	Disagree	2	1	3	2	4	4	2	3	2	4	2	4	3	2	2	1	3
42	3	Female	2	Married	2	College/University or Above	4	Professional/White Collar Worker	2	PHP 20,000 to 100,000	3	Urban	2	NCR	No	2	2	1	2	4	2	5	2	3	2	3	2	3	2	1	3	Strongly Agree	4	2	4	2	4	3	2	3	2	4	2	4	3	2	2	1	3
25	1	Female	2	Single	1	College/University or Above	4	Professional/White Collar Worker	2	PHP 100,000 or more	4	Urban	2	NCR	No	2	2	2	2	4	2	3	1	1	1	2	1	3	2	4	1	Disagree	2	1	2	1	4	2	1	2	1	2	1	4	2	1	3	2	3
31	2	Male	1	Single	1	College/University or Above	4	Professional/White Collar Worker	2	PHP 10,000 to 20,000	2	Urban	2	Region VII	No	2	2	1	2	3	1	5	2	4	2	4	2	4	2	1	1	Disagree	2	1	4	2	4	4	2	2	1	4	2	4	4	2	3	2	3
65	5	Male	1	Married	2	College/University or Above	4	Housewife/Retired/Unemployed/Other	5	PHP 100,000 or more	4	Urban	2	NCR	No	2	2	1	1	5	3	4	2	1	1	1	1	3	2	4	4	Disagree	2	1	2	1	3	4	2	4	2	4	2	4	4	2	4	2	3
18	1	Male	1	Single	1	College/University or Above	4	Student	4	PHP 10,000 or less	1	Urban	2	Region IV-A	No	2	2	2	2	4	2	5	2	1	1	3	2	4	2	4	3	Strongly Disagree	1	1	4	2	4	4	2	3	2	3	2	4	4	2	2	1	2
43	3	Female	2	Married	2	College/University or Above	4	Professional/White Collar Worker	2	PHP 20,000 to 100,000	3	Urban	2	NCR	Yes	1	2	1	2	5	3	5	2	2	1	2	1	4	2	4	2	Agree	3	2	4	2	4	4	2	3	2	4	2	4	4	2	4	2	2
20	1	Female	2	Single	1	College/University or Above	4	Student	4	PHP 100,000 or more	4	Urban	2	NCR	No	2	2	1	2	4	2	5	2	4	2	4	2	4	2	1	3	Agree	3	2	4	2	4	4	2	3	2	4	2	4	4	2	2	1	3
60	4	Male	1	Single	1	College/University or Above	4	Housewife/Retired/Unemployed/Other	5	PHP 100,000 or more	4	Urban	2	Region IV-A	No	2	2	1	2	5	3	5	2	3	2	3	2	4	2	1	1	Disagree	2	1	3	2	3	4	2	3	2	4	2	4	4	2	4	2	3
53	4	Male	1	Married	2	College/University or Above	4	Professional/White Collar Worker	2	PHP 20,000 to 100,000	3	Urban	2	Region VII	No	2	2	2	2	3	1	5	2	2	1	2	1	4	2	4	3	Agree	3	2	3	2	3	3	2	3	2	3	2	3	3	2	3	2	3
59	4	Female	2	Married	2	College/University or Above	4	Professional/White Collar Worker	2	PHP 100,000 or more	4	Urban	2	Region IV-A	No	2	2	1	1	4	2	5	2	2	1	2	1	3	2	4	3	Agree	3	2	3	2	3	4	2	2	1	4	2	4	4	2	4	2	2
20	1	Male	1	Single	1	College/University or Above	4	Student	4	PHP 10,000 or less	1	Urban	2	NCR	No	2	2	1	1	4	2	5	2	2	1	3	2	3	2	1	3	Disagree	2	1	3	2	3	3	2	3	2	4	2	4	4	2	3	2	2
54	4	Female	2	Married	2	College/University or Above	4	Housewife/Retired/Unemployed/Other	5	PHP 100,000 or more	4	Urban	2	NCR	No	2	2	1	2	4	2	4	2	3	2	1	1	3	2	4	2	Agree	3	2	4	2	4	4	2	3	2	3	2	4	3	2	3	2	3
60	4	Female	2	Single	1	College/University or Above	4	Professional/White Collar Worker	2	PHP 20,000 to 100,000	3	Urban	2	NCR	No	2	2	2	2	4	2	5	2	3	2	3	2	3	2	1	2	Agree	3	2	2	1	2	3	2	3	2	4	2	4	3	2	3	2	2
21	1	Female	2	Single	1	College/University or Above	4	Student	4	PHP 20,000 to 100,000	3	Urban	2	NCR	No	2	2	2	2	4	2	4	2	3	2	3	2	3	2	1	2	Agree	3	2	3	2	3	4	2	4	2	4	2	4	3	2	3	2	2
20	1	Male	1	Single	1	College/University or Above	4	Student	4	PHP 10,000 or less	1	Urban	2	Region III	No	2	2	1	1	5	3	4	2	2	1	3	2	3	2	1	3	Agree	3	2	3	2	3	4	2	3	2	4	2	4	3	2	3	2	2
53	4	Male	1	Single	1	College/University or Above	4	Professional/White Collar Worker	2	PHP 10,000 to 20,000	2	Urban	2	Region XI	No	2	2	2	1	4	2	4	2	2	1	2	1	3	2	1	1	Agree	3	2	3	2	3	3	2	3	2	3	2	3	3	2	2	1	3
44	3	Female	2	Single	1	College/University or Above	4	Professional/White Collar Worker	2	PHP 20,000 to 100,000	3	Urban	2	Region VII	No	2	1	1	2	4	2	4	2	2	1	3	2	3	2	1	2	Disagree	2	1	3	2	3	3	2	2	1	3	2	4	3	2	3	2	3
31	2	Female	2	Single	1	College/University or Above	4	Professional/White Collar Worker	2	PHP 20,000 to 100,000	3	Urban	2	NCR	Yes	1	2	1	2	5	3	5	2	4	2	4	2	4	2	1	3	Strongly Disagree	1	1	3	2	4	4	2	1	1	4	2	4	4	2	4	2	3
19	1	Female	2	Single	1	College/University or Above	4	Student	4	PHP 10,000 or less	1	Rural	1	Region IV-A	No	2	2	1	1	2	1	5	2	2	1	3	2	3	2	1	4	Strongly Disagree	1	1	3	2	4	4	2	3	2	4	2	4	4	2	4	2	3
24	1	Male	1	Single	1	College/University or Above	4	Professional/White Collar Worker	2	PHP 20,000 to 100,000	3	Urban	2	NCR	Yes	1	2	1	2	3	1	4	2	2	1	2	1	3	2	4	2	Disagree	2	1	4	2	4	4	2	3	2	4	2	4	3	2	3	2	3
21	1	Male	1	Single	1	College/University or Above	4	Student	4	PHP 10,000 or less	1	Urban	2	Region IV-A	No	2	2	1	2	4	2	5	2	2	1	2	1	3	2	4	4	Disagree	2	1	4	2	4	4	2	3	2	4	2	4	4	2	4	2	3
18	1	Female	2	Single	1	College/University or Above	4	Student	4	PHP 10,000 or less	1	Urban	2	NCR	Yes	1	2	1	2	3	1	5	2	1	1	2	1	3	2	1	3	Agree	3	2	4	2	4	3	2	3	2	4	2	4	4	2	4	2	3
21	1	Male	1	Single	1	College/University or Above	4	Student	4	PHP 10,000 or less	1	Urban	2	NCR	No	2	2	1	2	3	1	5	2	1	1	2	1	3	2	4	3	Agree	3	2	4	2	4	4	2	4	2	4	2	4	4	2	4	2	4
22	1	Male	1	Single	1	College/University or Above	4	Student	4	PHP 100,000 or more	4	Urban	2	Region V	No	2	2	2	2	3	1	5	2	2	1	2	1	4	2	1	2	Agree	3	2	4	2	4	4	2	4	2	4	2	4	4	2	4	2	4
21	1	Male	1	Single	1	College/University or Above	4	Student	4	PHP 20,000 to 100,000	3	Rural	1	Region III	Yes	1	2	1	2	4	2	5	2	1	1	2	1	4	2	4	3	Agree	3	2	4	2	4	3	2	3	2	4	2	4	4	2	4	2	3
49	3	Male	1	Married	2	College/University or Above	4	Self-employed	3	PHP 10,000 to 20,000	2	Urban	2	Region II	No	2	2	1	2	5	3	5	2	4	2	3	2	4	2	4	2	Agree	3	2	3	2	3	4	2	4	2	4	2	4	4	2	4	2	3
18	1	Female	2	Single	1	College/University or Above	4	Student	4	PHP 10,000 or less	1	Urban	2	Region IV-A	No	2	2	2	2	4	2	3	1	1	1	1	1	1	1	1	3	Disagree	2	1	3	2	4	4	2	4	2	4	2	4	3	2	3	2	4
19	1	Female	2	Single	1	College/University or Above	4	Student	4	PHP 20,000 to 100,000	3	Urban	2	NCR	No	2	2	1	2	4	2	1	1	2	1	2	1	2	1	1	2	Disagree	2	1	3	2	3	4	2	3	2	4	2	4	2	1	1	1	4
21	1	Female	2	Single	1	College/University or Above	4	Student	4	PHP 10,000 to 20,000	2	Urban	2	NCR	No	2	2	1	2	5	3	3	1	2	1	2	1	3	2	4	2	Strongly Disagree	1	1	3	2	4	4	2	3	2	3	2	3	2	1	2	1	3
24	1	Male	1	Single	1	College/University or Above	4	Student	4	PHP 10,000 or less	1	Urban	2	Region VI	No	2	2	1	2	3	1	5	2	2	1	2	1	3	2	4	4	Agree	3	2	3	2	4	4	2	2	1	3	2	4	4	2	4	2	4
20	1	Female	2	Single	1	College/University or Above	4	Student	4	PHP 20,000 to 100,000	3	Urban	2	NCR	No	2	2	2	2	4	2	4	2	3	2	3	2	3	2	1	4	Disagree	2	1	3	2	4	3	2	3	2	3	2	4	3	2	3	2	4
65	5	Female	2	Married	2	College/University or Above	4	Housewife/Retired/Unemployed/Other	5	PHP 10,000 to 20,000	2	Urban	2	NCR	No	2	2	1	1	3	1	5	2	3	2	2	1	3	2	4	1	Agree	3	2	3	2	3	3	2	3	2	3	2	3	3	2	3	2	3
20	1	Female	2	Single	1	College/University or Above	4	Student	4	PHP 10,000 or less	1	Urban	2	NCR	Yes	1	2	1	2	4	2	4	2	3	2	3	2	3	2	1	1	Strongly Disagree	1	1	4	2	4	4	2	2	1	4	2	4	3	2	2	1	4
53	4	Female	2	Married	2	College/University or Above	4	Professional/White Collar Worker	2	PHP 20,000 to 100,000	3	Urban	2	Region IV-A	No	2	2	1	2	4	2	2	1	2	1	2	1	2	1	1	1	Strongly Disagree	1	1	1	1	1	1	1	1	1	1	1	1	1	1	2	1	1
19	1	Female	2	Single	1	College/University or Above	4	Student	4	PHP 10,000 or less	1	Urban	2	NCR	No	2	2	2	2	4	2	5	2	2	1	2	1	3	2	1	5	Agree	3	2	4	2	4	4	2	3	2	4	2	4	1	1	4	2	2
55	4	Female	2	Married	2	College/University or Above	4	Professional/White Collar Worker	2	PHP 20,000 to 100,000	3	Urban	2	NCR	No	2	2	1	2	4	2	3	1	2	1	2	1	2	1	1	2	Disagree	2	1	3	2	3	2	1	2	1	3	2	3	3	2	3	2	2
22	1	Female	2	Single	1	College/University or Above	4	Professional/White Collar Worker	2	PHP 10,000 to 20,000	2	Urban	2	NCR	Yes	1	1	1	2	5	3	2	1	2	1	2	1	3	2	1	1	Disagree	2	1	4	2	4	3	2	1	1	2	1	1	2	1	2	1	4
64	5	Female	2	Married	2	College/University or Above	4	Professional/White Collar Worker	2	PHP 100,000 or more	4	Urban	2	NCR	No	2	2	1	1	2	1	1	1	1	1	1	1	1	1	1	1	Disagree	2	1	2	1	3	3	2	2	1	3	2	3	2	1	2	1	4
21	1	Female	2	Single	1	College/University or Above	4	Student	4	PHP 10,000 or less	1	Urban	2	NCR	No	2	2	2	2	4	2	3	1	2	1	3	2	3	2	4	3	Disagree	2	1	3	2	3	4	2	2	1	4	2	4	2	1	2	1	3
47	3	Male	1	Married	2	College/University or Above	4	Professional/White Collar Worker	2	PHP 100,000 or more	4	Urban	2	NCR	No	2	2	1	1	4	2	5	2	1	1	2	1	3	2	4	1	Agree	3	2	3	2	3	3	2	2	1	4	2	3	2	1	2	1	3
21	1	Female	2	Single	1	College/University or Above	4	Student	4	PHP 100,000 or more	4	Urban	2	NCR	No	2	2	2	2	5	3	2	1	2	1	2	1	2	1	1	3	Disagree	2	1	3	2	3	4	2	3	2	4	2	4	2	1	2	1	4
56	4	Male	1	Married	2	College/University or Above	4	Housewife/Retired/Unemployed/Other	5	PHP 10,000 or less	1	Urban	2	NCR	No	2	2	1	2	5	3	1	1	2	1	2	1	2	1	1	1	Strongly Agree	4	2	4	2	4	3	2	3	2	4	2	4	1	1	1	1	4
39	2	Female	2	Single	1	College/University or Above	4	Professional/White Collar Worker	2	PHP 20,000 to 100,000	3	Urban	2	Region VI	No	2	2	1	1	2	1	4	2	2	1	2	1	3	2	4	2	Agree	3	2	4	2	4	3	2	2	1	3	2	4	3	2	2	1	3
19	1	Female	2	Single	1	College/University or Above	4	Student	4	PHP 10,000 or less	1	Urban	2	NCR	No	2	2	1	2	3	1	2	1	1	1	1	1	1	1	1	3	Disagree	2	1	4	2	4	4	2	3	2	4	2	4	3	2	2	1	4
23	1	Female	2	Single	1	College/University or Above	4	Student	4	PHP 20,000 to 100,000	3	Rural	1	Region IV-A	No	2	2	1	2	5	3	1	1	1	1	1	1	1	1	1	1	Strongly Disagree	1	1	2	1	2	3	2	2	1	2	1	2	3	2	3	2	4
37	2	Female	2	Married	2	College/University or Above	4	Professional/White Collar Worker	2	PHP 20,000 to 100,000	3	Urban	2	Region VI	No	2	2	1	2	5	3	5	2	2	1	3	2	4	2	4	2	Disagree	2	1	2	1	3	3	2	2	1	3	2	3	3	2	3	2	3
39	2	Female	2	Single	1	College/University or Above	4	Professional/White Collar Worker	2	PHP 10,000 to 20,000	2	Urban	2	Region IV-A	No	2	2	1	2	4	2	5	2	3	2	3	2	3	2	1	3	Disagree	2	1	3	2	3	4	2	2	1	4	2	4	3	2	3	2	3
39	2	Male	1	Single	1	College/University or Above	4	Professional/White Collar Worker	2	PHP 10,000 or less	1	Urban	2	NCR	No	2	2	1	2	5	3	5	2	2	1	2	1	3	2	4	1	Agree	3	2	1	1	4	4	2	3	2	4	2	4	3	2	3	2	4
59	4	Female	2	Married	2	College/University or Above	4	Self-employed	3	PHP 20,000 to 100,000	3	Urban	2	Region VII	No	2	2	2	2	3	1	4	2	1	1	2	1	3	2	4	3	Disagree	2	1	3	2	3	3	2	3	2	3	2	3	3	2	3	2	3
20	1	Female	2	Single	1	College/University or Above	4	Student	4	PHP 10,000 or less	1	Urban	2	NCR	No	2	2	1	2	4	2	5	2	1	1	2	1	4	2	4	1	Strongly Disagree	1	1	4	2	4	4	2	4	2	4	2	4	3	2	4	2	4
29	1	Female	2	Single	1	College/University or Above	4	Professional/White Collar Worker	2	PHP 20,000 to 100,000	3	Urban	2	NCR	No	2	2	1	2	4	2	3	1	1	1	1	1	3	2	4	1	Disagree	2	1	4	2	4	4	2	3	2	4	2	4	3	2	3	2	4
24	1	Female	2	Single	1	College/University or Above	4	Professional/White Collar Worker	2	PHP 10,000 to 20,000	2	Rural	1	Region III	No	2	2	2	2	4	2	3	1	2	1	2	1	2	1	1	2	Disagree	2	1	3	2	4	4	2	3	2	4	2	4	3	2	3	2	4
19	1	Female	2	Single	1	College/University or Above	4	Student	4	PHP 10,000 or less	1	Urban	2	NCR	No	2	2	2	2	4	2	5	2	1	1	1	1	3	2	1	3	Strongly Disagree	1	1	3	2	4	4	2	3	2	4	2	4	3	2	3	2	3
22	1	Female	2	Single	1	College/University or Above	4	Professional/White Collar Worker	2	PHP 10,000 to 20,000	2	Rural	1	Region VI	No	2	2	1	2	5	3	5	2	3	2	3	2	4	2	1	1	Disagree	2	1	4	2	4	3	2	3	2	4	2	4	3	2	3	2	4
29	1	Female	2	Single	1	College/University or Above	4	Blue Collar Worker	1	PHP 20,000 to 100,000	3	Rural	1	Region III	No	2	2	1	2	5	3	4	2	2	1	2	1	3	2	4	2	Disagree	2	1	3	2	3	4	2	3	2	4	2	4	3	2	3	2	4
21	1	Male	1	Single	1	College/University or Above	4	Housewife/Retired/Unemployed/Other	5	PHP 10,000 or less	1	Rural	1	Region III	No	2	2	2	2	5	3	3	1	2	1	2	1	2	1	1	3	Disagree	2	1	3	2	3	4	2	3	2	3	2	4	3	2	3	2	3
45	3	Female	2	Married	2	College/University or Above	4	Self-employed	3	PHP 20,000 to 100,000	3	Urban	2	Region IV-A	No	2	2	2	2	5	3	1	1	1	1	1	1	3	2	4	1	Disagree	2	1	4	2	4	4	2	4	2	4	2	3	3	2	3	2	3
54	4	Female	2	Married	2	College/University or Above	4	Self-employed	3	PHP 100,000 or more	4	Urban	2	Region VII	No	2	2	1	1	3	1	4	2	3	2	3	2	3	2	1	1	Strongly Agree	4	2	4	2	4	4	2	3	2	4	2	4	3	2	3	2	4
57	4	Female	2	Married	2	College/University or Above	4	Housewife/Retired/Unemployed/Other	5	PHP 20,000 to 100,000	3	Urban	2	Region VII	No	2	1	1	1	4	2	5	2	1	1	2	1	3	2	4	1	Agree	3	2	4	2	4	4	2	3	2	3	2	4	4	2	4	2	3
20	1	Female	2	Single	1	College/University or Above	4	Student	4	PHP 10,000 or less	1	Urban	2	NCR	Yes	1	2	1	2	4	2	5	2	2	1	2	1	3	2	4	1	Agree	3	2	3	2	3	3	2	3	2	3	2	3	3	2	3	2	3
22	1	Male	1	Single	1	College/University or Above	4	Professional/White Collar Worker	2	PHP 10,000 to 20,000	2	Urban	2	NCR	Yes	1	2	1	2	4	2	5	2	1	1	1	1	3	2	1	1	Agree	3	2	4	2	4	4	2	4	2	4	2	4	4	2	4	2	4
43	3	Female	2	Married	2	College/University or Above	4	Professional/White Collar Worker	2	PHP 10,000 to 20,000	2	Urban	2	NCR	No	2	2	1	2	4	2	4	2	3	2	3	2	3	2	4	4	Strongly Agree	4	2	4	2	4	4	2	4	2	4	2	4	3	2	3	2	4
25	1	Female	2	Single	1	College/University or Above	4	Professional/White Collar Worker	2	PHP 20,000 to 100,000	3	Urban	2	NCR	No	2	2	1	2	4	2	5	2	1	1	3	2	3	2	4	4	Agree	3	2	4	2	4	4	2	4	2	4	2	4	4	2	3	2	3
38	2	Male	1	Married	2	College/University or Above	4	Professional/White Collar Worker	2	PHP 20,000 to 100,000	3	Urban	2	NCR	Yes	1	2	1	2	4	2	5	2	1	1	3	2	3	2	4	2	Agree	3	2	4	2	4	4	2	3	2	4	2	4	3	2	3	2	3
18	1	Male	1	Single	1	College/University or Above	4	Student	4	PHP 20,000 to 100,000	3	Urban	2	CAR	No	2	2	1	2	4	2	4	2	1	1	2	1	3	2	4	2	Agree	3	2	4	2	4	4	2	3	2	3	2	3	3	2	3	2	4
43	3	Female	2	Married	2	College/University or Above	4	Professional/White Collar Worker	2	PHP 100,000 or more	4	Urban	2	Region III	No	2	2	1	2	4	2	4	2	3	2	3	2	3	2	1	1	Agree	3	2	4	2	4	4	2	3	2	4	2	4	3	2	4	2	3
21	1	Female	2	Single	1	College/University or Above	4	Student	4	PHP 20,000 to 100,000	3	Urban	2	NCR	No	2	2	2	2	4	2	5	2	2	1	2	1	4	2	4	3	Agree	3	2	4	2	4	4	2	3	2	4	2	4	4	2	4	2	3
42	3	Male	1	Single	1	College/University or Above	4	Self-employed	3	PHP 100,000 or more	4	Urban	2	NCR	No	2	2	1	2	5	3	4	2	2	1	1	1	3	2	1	2	Agree	3	2	4	2	4	4	2	3	2	4	2	4	4	2	3	2	4
53	4	Female	2	Married	2	College/University or Above	4	Self-employed	3	PHP 20,000 to 100,000	3	Urban	2	NCR	No	2	2	1	2	5	3	5	2	2	1	3	2	4	2	4	1	Strongly Agree	4	2	3	2	3	3	2	2	1	3	2	3	4	2	4	2	3
20	1	Male	1	Single	1	College/University or Above	4	Student	4	PHP 10,000 or less	1	Urban	2	NCR	Yes	1	2	2	1	4	2	4	2	1	1	1	1	3	2	4	3	Disagree	2	1	2	1	2	4	2	3	2	3	2	4	4	2	3	2	3
45	3	Female	2	Married	2	College/University or Above	4	Professional/White Collar Worker	2	PHP 100,000 or more	4	Urban	2	Region IV-A	No	2	2	1	2	4	2	5	2	3	2	2	1	3	2	1	2	Agree	3	2	3	2	3	3	2	3	2	3	2	3	3	2	2	1	3
19	1	Female	2	Single	1	College/University or Above	4	Student	4	PHP 20,000 to 100,000	3	Urban	2	NCR	No	2	2	1	2	5	3	5	2	2	1	4	2	3	2	3	4	Disagree	2	1	3	2	3	4	2	4	2	4	2	4	3	2	3	2	3
20	1	Female	2	Single	1	College/University or Above	4	Student	4	PHP 20,000 to 100,000	3	Rural	1	Region III	No	2	2	1	2	4	2	4	2	2	1	3	2	4	2	1	2	Agree	3	2	4	2	4	4	2	3	2	4	2	4	4	2	4	2	3
18	1	Male	1	Single	1	College/University or Above	4	Student	4	PHP 10,000 or less	1	Urban	2	NCR	No	2	2	2	2	4	2	5	2	2	1	2	1	3	2	4	3	Agree	3	2	4	2	4	4	2	3	2	4	2	4	4	2	4	2	3
18	1	Female	2	Single	1	College/University or Above	4	Student	4	PHP 10,000 or less	1	Urban	2	NCR	No	2	2	1	2	5	3	5	2	3	2	3	2	3	2	1	4	Agree	3	2	4	2	4	4	2	3	2	4	2	4	3	2	4	2	3
54	4	Female	2	Married	2	College/University or Above	4	Self-employed	3	PHP 10,000 or less	1	Urban	2	NCR	No	2	1	1	2	5	3	3	1	2	1	3	2	3	2	4	3	Agree	3	2	3	2	3	3	2	3	2	3	2	3	3	2	3	2	3
20	1	Female	2	Single	1	College/University or Above	4	Student	4	PHP 10,000 or less	1	Urban	2	NCR	No	2	2	2	2	4	2	4	2	1	1	2	1	3	2	4	2	Disagree	2	1	2	1	3	3	2	3	2	2	1	3	3	2	3	2	3
51	4	Male	1	Married	2	College/University or Above	4	Self-employed	3	PHP 10,000 to 20,000	2	Urban	2	Region VII	No	2	2	1	1	2	1	5	2	3	2	3	2	3	2	1	1	Disagree	2	1	2	1	3	3	2	2	1	3	2	3	3	2	3	2	3
53	4	Female	2	Married	2	College/University or Above	4	Professional/White Collar Worker	2	PHP 20,000 to 100,000	3	Urban	2	NCR	Yes	1	2	2	2	4	2	5	2	2	1	2	1	3	2	4	2	Disagree	2	1	3	2	3	4	2	2	1	4	2	3	3	2	3	2	3
64	5	Male	1	Married	2	College/University or Above	4	Self-employed	3	PHP 10,000 or less	1	Urban	2	NCR	No	2	2	1	2	4	2	4	2	3	2	2	1	3	2	4	1	Agree	3	2	2	1	3	3	2	3	2	4	2	4	4	2	4	2	4
28	1	Male	1	Single	1	College/University or Above	4	Professional/White Collar Worker	2	PHP 20,000 to 100,000	3	Urban	2	NCR	No	2	2	1	1	3	1	5	2	1	1	2	1	4	2	4	1	Strongly Agree	4	2	4	2	4	4	2	4	2	4	2	4	4	2	4	2	3
19	1	Male	1	Single	1	College/University or Above	4	Student	4	PHP 10,000 or less	1	Urban	2	Region IV-A	No	2	2	2	2	3	1	4	2	3	2	4	2	3	2	1	4	Strongly Agree	4	2	4	2	3	4	2	4	2	1	1	4	3	2	4	2	4
47	3	Female	2	Married	2	College/University or Above	4	Professional/White Collar Worker	2	PHP 20,000 to 100,000	3	Rural	1	Region IV-A	No	2	1	1	2	4	2	4	2	3	2	3	2	3	2	4	3	Disagree	2	1	3	2	3	3	2	2	1	3	2	3	3	2	3	2	3
48	3	Female	2	Single	1	College/University or Above	4	Professional/White Collar Worker	2	PHP 20,000 to 100,000	3	Urban	2	Region IV-A	No	2	2	1	2	4	2	5	2	2	1	2	1	3	2	4	2	Disagree	2	1	3	2	3	4	2	3	2	3	2	3	3	2	3	2	3
21	1	Male	1	Single	1	College/University or Above	4	Student	4	PHP 10,000 to 20,000	2	Urban	2	NCR	Yes	1	2	1	2	3	1	4	2	1	1	1	1	4	2	1	5	Strongly Agree	4	2	4	2	4	4	2	4	2	4	2	4	4	2	4	2	4
24	1	Male	1	Single	1	College/University or Above	4	Professional/White Collar Worker	2	PHP 20,000 to 100,000	3	Urban	2	Region IV-A	No	2	2	1	2	3	1	4	2	3	2	3	2	3	2	1	4	Agree	3	2	4	2	4	4	2	3	2	4	2	4	3	2	3	2	3
42	3	Female	2	Married	2	College/University or Above	4	Professional/White Collar Worker	2	PHP 100,000 or more	4	Urban	2	Region VII	No	2	2	1	2	4	2	5	2	2	1	1	1	3	2	4	1	Agree	3	2	4	2	4	4	2	3	2	4	2	4	2	1	3	2	2
22	1	Male	1	Single	1	College/University or Above	4	Student	4	PHP 10,000 or less	1	Urban	2	NCR	No	2	2	2	2	5	3	5	2	1	1	1	1	4	2	1	2	Disagree	2	1	4	2	4	3	2	3	2	4	2	4	4	2	4	2	2
61	5	Female	2	Married	2	College/University or Above	4	Housewife/Retired/Unemployed/Other	5	PHP 20,000 to 100,000	3	Urban	2	NCR	No	2	2	2	2	4	2	5	2	2	1	2	1	3	2	4	2	Disagree	2	1	3	2	3	4	2	3	2	4	2	4	3	2	3	2	3
20	1	Female	2	Single	1	College/University or Above	4	Student	4	PHP 10,000 or less	1	Urban	2	NCR	No	2	2	2	2	5	3	3	1	1	1	2	1	3	2	1	2	Strongly Disagree	1	1	4	2	4	4	2	3	2	4	2	4	4	2	4	2	4
21	1	Female	2	Single	1	College/University or Above	4	Student	4	PHP 20,000 to 100,000	3	Urban	2	Region I	No	2	2	1	2	4	2	5	2	2	1	3	2	4	2	4	3	Agree	3	2	4	2	4	3	2	4	2	4	2	4	4	2	4	2	3
21	1	Female	2	Single	1	College/University or Above	4	Student	4	PHP 10,000 to 20,000	2	Urban	2	NCR	Yes	1	2	1	2	4	2	5	2	1	1	3	2	4	2	4	4	Disagree	2	1	4	2	4	4	2	4	2	4	2	4	4	2	4	2	2
18	1	Female	2	Single	1	College/University or Above	4	Student	4	PHP 10,000 or less	1	Urban	2	NCR	No	2	2	1	2	3	1	4	2	2	1	3	2	3	2	1	2	Disagree	2	1	3	2	4	3	2	3	2	2	1	3	3	2	3	2	2
51	4	Female	2	Married	2	College/University or Above	4	Professional/White Collar Worker	2	PHP 20,000 to 100,000	3	Urban	2	NCR	No	2	2	1	2	4	2	4	2	1	1	2	1	3	2	4	1	Disagree	2	1	1	1	3	4	2	2	1	3	2	3	3	2	2	1	2
18	1	Male	1	Single	1	College/University or Above	4	Student	4	PHP 10,000 or less	1	Urban	2	Region III	No	2	2	1	1	3	1	5	2	3	2	3	2	4	2	4	3	Disagree	2	1	4	2	4	4	2	4	2	4	2	4	4	2	4	2	2
19	1	Male	1	Single	1	College/University or Above	4	Student	4	PHP 10,000 or less	1	Urban	2	Region III	No	2	2	1	2	5	3	5	2	2	1	3	2	3	2	1	1	Strongly Disagree	1	1	3	2	4	4	2	4	2	3	2	4	3	2	2	1	4
21	1	Male	1	Single	1	College/University or Above	4	Student	4	PHP 10,000 or less	1	Urban	2	NCR	Yes	1	2	1	2	4	2	2	1	2	1	2	1	4	2	4	1	Agree	3	2	4	2	4	4	2	3	2	4	2	4	3	2	2	1	3
70	5	Female	2	Single	1	College/University or Above	4	Housewife/Retired/Unemployed/Other	5	PHP 20,000 to 100,000	3	Urban	2	NCR	Yes	1	2	1	1	4	2	4	2	1	1	1	1	3	2	4	3	Disagree	2	1	3	2	3	3	2	2	1	2	1	3	3	2	3	2	3
56	4	Male	1	Single	1	College/University or Above	4	Self-employed	3	PHP 10,000 to 20,000	2	Rural	1	Region III	No	2	2	1	2	4	2	3	1	2	1	2	1	2	1	1	1	Disagree	2	1	3	2	3	3	2	3	2	2	1	2	3	2	3	2	3
23	1	Female	2	Single	1	College/University or Above	4	Student	4	PHP 10,000 or less	1	Urban	2	Region II	No	2	2	2	2	4	2	5	2	2	1	2	1	3	2	1	3	Disagree	2	1	3	2	3	4	2	2	1	3	2	4	3	2	3	2	3
20	1	Female	2	Single	1	College/University or Above	4	Student	4	PHP 20,000 to 100,000	3	Urban	2	NCR	No	2	2	2	1	3	1	5	2	2	1	3	2	3	2	4	3	Disagree	2	1	3	2	2	4	2	3	2	3	2	3	3	2	3	2	3
23	1	Female	2	Single	1	College/University or Above	4	Professional/White Collar Worker	2	PHP 10,000 or less	1	Rural	1	Region III	No	2	2	1	2	4	2	3	1	2	1	2	1	2	1	1	2	Disagree	2	1	3	2	4	3	2	3	2	3	2	4	3	2	3	2	4
49	3	Female	2	Married	2	College/University or Above	4	Professional/White Collar Worker	2	PHP 20,000 to 100,000	3	Urban	2	Region IV-A	No	2	2	1	2	4	2	4	2	1	1	2	1	3	2	4	1	Disagree	2	1	4	2	4	4	2	3	2	4	2	4	3	2	3	2	4
28	1	Male	1	Single	1	College/University or Above	4	Professional/White Collar Worker	2	PHP 100,000 or more	4	Urban	2	NCR	No	2	2	1	2	4	2	5	2	1	1	2	1	4	2	4	4	Strongly Disagree	1	1	4	2	4	4	2	4	2	4	2	4	3	2	3	2	3
19	1	Female	2	Single	1	College/University or Above	4	Student	4	PHP 10,000 or less	1	Urban	2	Region IV-A	No	2	2	2	2	4	2	4	2	3	2	4	2	4	2	4	2	Disagree	2	1	4	2	4	4	2	4	2	4	2	4	3	2	3	2	4
48	3	Female	2	Married	2	College/University or Above	4	Professional/White Collar Worker	2	PHP 100,000 or more	4	Urban	2	NCR	No	2	1	2	1	5	3	4	2	1	1	1	1	3	2	1	3	Disagree	2	1	3	2	3	4	2	4	2	4	2	4	4	2	4	2	3
20	1	Male	1	Single	1	College/University or Above	4	Student	4	PHP 10,000 or less	1	Rural	1	Region IV-A	No	2	2	1	2	5	3	5	2	2	1	2	1	4	2	1	4	Strongly Disagree	1	1	4	2	4	4	2	3	2	4	2	4	3	2	3	2	3
46	3	Female	2	Married	2	College/University or Above	4	Professional/White Collar Worker	2	PHP 20,000 to 100,000	3	Urban	2	Region III	No	2	2	1	2	5	3	5	2	1	1	3	2	3	2	4	3	Disagree	2	1	3	2	3	4	2	3	2	4	2	3	3	2	3	2	3
21	1	Male	1	Single	1	College/University or Above	4	Student	4	PHP 10,000 or less	1	Urban	2	NCR	No	2	2	1	2	4	2	4	2	2	1	3	2	4	2	1	2	Agree	3	2	3	2	3	4	2	3	2	3	2	4	3	2	3	2	3
32	2	Male	1	Single	1	College/University or Above	4	Professional/White Collar Worker	2	PHP 20,000 to 100,000	3	Rural	1	Region IV-A	No	2	2	1	2	5	3	5	2	1	1	2	1	4	2	4	4	Agree	3	2	3	2	4	4	2	3	2	4	2	4	4	2	4	2	4
64	5	Female	2	Married	2	College/University or Above	4	Housewife/Retired/Unemployed/Other	5	PHP 20,000 to 100,000	3	Urban	2	NCR	No	2	2	2	1	4	2	3	1	2	1	2	1	2	1	1	3	Disagree	2	1	2	1	3	3	2	2	1	3	2	3	3	2	3	2	3
57	4	Female	2	Married	2	College/University or Above	4	Housewife/Retired/Unemployed/Other	5	PHP 100,000 or more	4	Urban	2	NCR	Yes	1	2	1	1	4	2	2	1	2	1	2	1	2	1	1	1	Agree	3	2	3	2	4	3	2	4	2	4	2	4	2	1	3	2	4
27	1	Female	2	Single	1	College/University or Above	4	Professional/White Collar Worker	2	PHP 20,000 to 100,000	3	Rural	1	Region VI	No	2	2	1	2	4	2	4	2	2	1	3	2	3	2	4	3	Strongly Disagree	1	1	4	2	4	4	2	2	1	4	2	4	3	2	3	2	3
62	5	Male	1	Married	2	College/University or Above	4	Self-employed	3	PHP 100,000 or more	4	Urban	2	NCR	Yes	1	2	1	2	5	3	4	2	2	1	3	2	3	2	1	1	Disagree	2	1	3	2	3	3	2	3	2	4	2	4	3	2	3	2	4
67	5	Female	2	Married	2	College/University or Above	4	Housewife/Retired/Unemployed/Other	5	PHP 100,000 or more	4	Urban	2	NCR	No	2	2	1	2	5	3	5	2	1	1	1	1	3	2	4	2	Disagree	2	1	4	2	4	4	2	3	2	4	2	4	3	2	3	2	3
39	2	Female	2	Married	2	College/University or Above	4	Professional/White Collar Worker	2	PHP 100,000 or more	4	Urban	2	NCR	No	2	2	1	1	3	1	3	1	1	1	1	1	2	1	1	4	Agree	3	2	4	2	4	4	2	3	2	4	2	4	3	2	3	2	4
54	4	Female	2	Married	2	College/University or Above	4	Self-employed	3	PHP 100,000 or more	4	Urban	2	Region VI	No	2	2	1	2	4	2	3	1	2	1	2	1	2	1	1	3	Agree	3	2	2	1	3	3	2	2	1	2	1	3	3	2	2	1	3
72	5	Female	2	Single	1	College/University or Above	4	Professional/White Collar Worker	2	PHP 10,000 or less	1	Urban	2	Region I	No	2	2	1	2	4	2	1	1	1	1	1	1	1	1	1	2	Strongly Disagree	1	1	2	1	2	3	2	3	2	3	2	3	2	1	2	1	3
59	4	Female	2	Married	2	College/University or Above	4	Self-employed	3	PHP 100,000 or more	4	Rural	1	Region VII	No	2	2	1	2	4	2	3	1	1	1	1	1	2	1	1	1	Strongly Disagree	1	1	4	2	4	3	2	3	2	3	2	4	2	1	2	1	4
57	4	Female	2	Single	1	College/University or Above	4	Housewife/Retired/Unemployed/Other	5	PHP 10,000 or less	1	Urban	2	Region VI	No	2	2	2	1	4	2	4	2	1	1	1	1	4	2	4	2	Agree	3	2	3	2	4	3	2	3	2	4	2	4	2	1	2	1	4
34	2	Female	2	Single	1	College/University or Above	4	Housewife/Retired/Unemployed/Other	5	PHP 20,000 to 100,000	3	Urban	2	NCR	No	2	2	1	2	3	1	3	1	1	1	2	1	3	2	4	2	Disagree	2	1	3	2	4	4	2	3	2	4	2	4	3	2	2	1	4
24	1	Female	2	Single	1	College/University or Above	4	Student	4	PHP 10,000 to 20,000	2	Urban	2	NCR	Yes	1	2	1	2	5	3	3	1	2	1	2	1	3	2	4	1	Strongly Disagree	1	1	3	2	1	4	2	3	2	4	2	4	3	2	2	1	4
59	4	Male	1	Married	2	College/University or Above	4	Self-employed	3	PHP 20,000 to 100,000	3	Urban	2	Region X	No	2	2	1	1	4	2	3	1	1	1	1	1	3	2	1	1	Agree	3	2	4	2	4	4	2	4	2	4	2	4	3	2	2	1	3
19	1	Female	2	Single	1	College/University or Above	4	Student	4	PHP 10,000 or less	1	Rural	1	Region VI	No	2	2	1	2	3	1	3	1	2	1	2	1	2	1	4	3	Agree	3	2	3	2	3	3	2	2	1	2	1	3	2	1	3	2	4
21	1	Female	2	Single	1	College/University or Above	4	Student	4	PHP 100,000 or more	4	Rural	1	Region II	No	2	2	1	2	4	2	3	1	2	1	2	1	2	1	1	1	Strongly Agree	4	2	4	2	4	4	2	4	2	4	2	4	2	1	3	2	4
20	1	Male	1	Single	1	College/University or Above	4	Student	4	PHP 10,000 or less	1	Urban	2	NCR	No	2	2	2	2	4	2	4	2	2	1	2	1	3	2	4	2	Disagree	2	1	2	1	3	3	2	2	1	2	1	3	3	2	3	2	3
19	1	Female	2	Single	1	College/University or Above	4	Student	4	PHP 10,000 or less	1	Urban	2	NCR	Yes	1	2	1	2	4	2	4	2	1	1	2	1	3	2	4	3	Disagree	2	1	2	1	4	4	2	3	2	2	1	4	3	2	3	2	3
29	1	Male	1	Single	1	College/University or Above	4	Professional/White Collar Worker	2	PHP 20,000 to 100,000	3	Rural	1	Region III	No	2	2	2	1	4	2	4	2	2	1	2	1	3	2	4	1	Disagree	2	1	3	2	3	3	2	2	1	4	2	3	3	2	3	2	3
19	1	Female	2	Single	1	College/University or Above	4	Student	4	PHP 100,000 or more	4	Urban	2	NCR	No	2	1	1	2	4	2	4	2	2	1	2	1	3	2	4	3	Agree	3	2	3	2	4	3	2	2	1	3	2	4	3	2	3	2	4
38	2	Female	2	Married	2	College/University or Above	4	Self-employed	3	PHP 20,000 to 100,000	3	Rural	1	Region IV-A	No	2	2	1	2	4	2	4	2	2	1	2	1	2	1	1	3	Strongly Agree	4	2	4	2	4	3	2	2	1	4	2	4	3	2	3	2	4
71	5	Female	2	Single	1	College/University or Above	4	Professional/White Collar Worker	2	PHP 20,000 to 100,000	3	Urban	2	NCR	No	2	2	1	2	4	2	3	1	2	1	2	1	3	2	4	2	Strongly Disagree	1	1	3	2	3	1	1	3	2	3	2	3	3	2	3	2	4
19	1	Female	2	Single	1	College/University or Above	4	Student	4	PHP 10,000 or less	1	Urban	2	NCR	No	2	2	1	2	3	1	5	2	1	1	3	2	3	2	4	4	Strongly Disagree	1	1	4	2	4	4	2	4	2	4	2	4	4	2	4	2	3
20	1	Female	2	Single	1	College/University or Above	4	Student	4	PHP 10,000 or less	1	Urban	2	Region IV-A	No	2	2	1	2	3	1	5	2	2	1	2	1	3	2	4	4	Strongly Disagree	1	1	3	2	4	4	2	3	2	3	2	4	4	2	4	2	4
21	1	Female	2	Single	1	College/University or Above	4	Student	4	PHP 100,000 or more	4	Urban	2	NCR	No	2	2	2	2	3	1	4	2	1	1	2	1	2	1	1	2	Disagree	2	1	3	2	3	3	2	3	2	4	2	4	3	2	3	2	3
44	3	Female	2	Married	2	College/University or Above	4	Housewife/Retired/Unemployed/Other	5	PHP 100,000 or more	4	Urban	2	NCR	Yes	1	2	1	2	4	2	5	2	1	1	1	1	3	2	4	3	Disagree	2	1	4	2	4	4	2	4	2	4	2	4	4	2	4	2	4
44	3	Female	2	Single	1	College/University or Above	4	Self-employed	3	PHP 10,000 or less	1	Urban	2	NCR	No	2	2	2	2	4	2	4	2	3	2	3	2	3	2	1	3	Disagree	2	1	3	2	3	3	2	3	2	3	2	4	4	2	4	2	3
19	1	Female	2	Single	1	College/University or Above	4	Student	4	PHP 10,000 or less	1	Urban	2	Region IV-A	No	2	2	2	2	4	2	3	1	2	1	3	2	3	2	1	3	Disagree	2	1	4	2	4	4	2	4	2	4	2	4	3	2	3	2	4
59	4	Female	2	Married	2	College/University or Above	4	Professional/White Collar Worker	2	PHP 100,000 or more	4	Urban	2	NCR	No	2	2	1	1	5	3	4	2	1	1	1	1	3	2	4	3	Disagree	2	1	3	2	4	4	2	3	2	4	2	4	3	2	3	2	3
19	1	Male	1	Single	1	College/University or Above	4	Student	4	PHP 100,000 or more	4	Rural	1	Region IV-A	No	2	2	1	2	5	3	3	1	1	1	3	2	3	2	4	3	Disagree	2	1	3	2	4	3	2	4	2	3	2	4	4	2	4	2	3
32	2	Male	1	Single	1	College/University or Above	4	Professional/White Collar Worker	2	PHP 20,000 to 100,000	3	Urban	2	NCR	No	2	2	1	2	5	3	4	2	3	2	3	2	3	2	4	3	Disagree	2	1	3	2	3	4	2	3	2	4	2	4	3	2	3	2	3
20	1	Female	2	Single	1	College/University or Above	4	Student	4	PHP 10,000 or less	1	Urban	2	NCR	Yes	1	2	2	2	5	3	4	2	1	1	2	1	3	2	4	1	Strongly Disagree	1	1	4	2	4	4	2	4	2	4	2	4	3	2	3	2	4
22	1	Female	2	Single	1	College/University or Above	4	Student	4	PHP 10,000 to 20,000	2	Urban	2	NCR	No	2	2	2	2	5	3	4	2	1	1	1	1	3	2	4	2	Disagree	2	1	3	2	3	4	2	4	2	3	2	3	3	2	3	2	4
42	3	Female	2	Single	1	College/University or Above	4	Professional/White Collar Worker	2	PHP 20,000 to 100,000	3	Urban	2	Region I	No	2	2	2	2	5	3	3	1	1	1	2	1	3	2	4	1	Strongly Disagree	1	1	4	2	4	4	2	4	2	4	2	4	3	2	3	2	3
21	1	Female	2	Single	1	College/University or Above	4	Student	4	PHP 10,000 or less	1	Urban	2	NCR	Yes	1	2	1	1	4	2	5	2	2	1	3	2	4	2	4	3	Agree	3	2	4	2	4	4	2	4	2	4	2	4	3	2	4	2	4
40	2	Male	1	Single	1	College/University or Above	4	Professional/White Collar Worker	2	PHP 20,000 to 100,000	3	Urban	2	NCR	Yes	1	2	1	1	4	2	5	2	3	2	3	2	3	2	1	3	Agree	3	2	3	2	4	4	2	4	2	4	2	4	4	2	4	2	3
22	1	Female	2	Single	1	College/University or Above	4	Student	4	PHP 10,000 or less	1	Urban	2	NCR	Yes	1	2	1	2	4	2	4	2	2	1	2	1	4	2	4	3	Agree	3	2	4	2	4	4	2	4	2	4	2	4	4	2	4	2	4
36	2	Male	1	Single	1	College/University or Above	4	Professional/White Collar Worker	2	PHP 20,000 to 100,000	3	Urban	2	Region IV-A	No	2	2	1	2	4	2	5	2	2	1	2	1	3	2	4	2	Agree	3	2	4	2	4	4	2	3	2	3	2	4	3	2	3	2	3
40	2	Female	2	Single	1	College/University or Above	4	Professional/White Collar Worker	2	PHP 20,000 to 100,000	3	Urban	2	Region IV-A	No	2	2	1	2	4	2	3	1	3	2	3	2	4	2	1	2	Agree	3	2	3	2	3	4	2	3	2	4	2	4	3	2	3	2	4
20	1	Female	2	Single	1	College/University or Above	4	Student	4	PHP 10,000 or less	1	Urban	2	NCR	Yes	1	2	2	2	4	2	3	1	1	1	2	1	3	2	4	3	Agree	3	2	3	2	3	4	2	4	2	4	2	4	3	2	4	2	4
21	1	Female	2	Single	1	College/University or Above	4	Student	4	PHP 10,000 or less	1	Urban	2	NCR	No	2	2	1	2	4	2	5	2	1	1	1	1	3	2	4	2	Disagree	2	1	3	2	3	3	2	3	2	3	2	3	3	2	3	2	2
70	5	Female	2	Married	2	College/University or Above	4	Self-employed	3	PHP 100,000 or more	4	Urban	2	NCR	No	2	2	1	1	4	2	5	2	1	1	2	1	4	2	4	2	Disagree	2	1	4	2	4	4	2	3	2	4	2	4	2	1	3	2	3
24	1	Male	1	Single	1	College/University or Above	4	Professional/White Collar Worker	2	PHP 20,000 to 100,000	3	Urban	2	NCR	Yes	1	2	1	2	4	2	5	2	2	1	1	1	4	2	1	3	Agree	3	2	3	2	3	4	2	3	2	3	2	3	4	2	4	2	3
55	4	Male	1	Married	2	College/University or Above	4	Self-employed	3	PHP 20,000 to 100,000	3	Urban	2	NCR	No	2	2	1	1	3	1	5	2	3	2	3	2	4	2	4	2	Agree	3	2	4	2	4	4	2	3	2	4	2	4	3	2	4	2	2
35	2	Male	1	Single	1	College/University or Above	4	Professional/White Collar Worker	2	PHP 10,000 or less	1	Urban	2	NCR	No	2	2	1	2	4	2	5	2	1	1	2	1	4	2	4	1	Disagree	2	1	3	2	4	3	2	2	1	3	2	4	3	2	3	2	4
36	2	Male	1	Single	1	College/University or Above	4	Professional/White Collar Worker	2	PHP 20,000 to 100,000	3	Urban	2	Region X	No	2	2	2	2	4	2	5	2	1	1	2	1	4	2	4	3	Disagree	2	1	3	2	3	3	2	3	2	3	2	4	4	2	4	2	2
22	1	Female	2	Single	1	College/University or Above	4	Self-employed	3	PHP 10,000 to 20,000	2	Urban	2	NCR	Yes	1	2	1	2	3	1	3	1	2	1	2	1	4	2	4	2	Strongly Agree	4	2	4	2	4	4	2	4	2	4	2	4	3	2	3	2	3
68	5	Female	2	Single	1	College/University or Above	4	Housewife/Retired/Unemployed/Other	5	PHP 10,000 or less	1	Urban	2	NCR	No	2	2	2	1	4	2	5	2	2	1	2	1	3	2	4	3	Agree	3	2	3	2	2	4	2	4	2	4	2	4	4	2	4	2	3
39	2	Female	2	Married	2	College/University or Above	4	Professional/White Collar Worker	2	PHP 100,000 or more	4	Urban	2	NCR	No	2	2	1	2	5	3	4	2	1	1	1	1	3	2	1	3	Strongly Disagree	1	1	4	2	4	4	2	2	1	4	2	4	3	2	3	2	3
19	1	Female	2	Single	1	College/University or Above	4	Student	4	PHP 10,000 or less	1	Urban	2	NCR	No	2	2	2	2	4	2	5	2	2	1	3	2	3	2	1	2	Disagree	2	1	3	2	3	4	2	3	2	3	2	3	3	2	3	2	2
61	5	Male	1	Married	2	College/University or Above	4	Self-employed	3	PHP 20,000 to 100,000	3	Urban	2	NCR	No	2	2	1	1	4	2	5	2	3	2	3	2	3	2	1	1	Disagree	2	1	2	1	3	3	2	2	1	2	1	3	3	2	3	2	3
21	1	Male	1	Single	1	College/University or Above	4	Student	4	PHP 10,000 or less	1	Urban	2	NCR	Yes	1	2	2	2	4	2	4	2	1	1	1	1	3	2	4	4	Strongly Disagree	1	1	3	2	4	4	2	3	2	3	2	4	4	2	3	2	2
21	1	Female	2	Single	1	College/University or Above	4	Student	4	PHP 20,000 to 100,000	3	Urban	2	Region IV-B	No	2	2	2	2	4	2	5	2	2	1	2	1	3	2	4	3	Disagree	2	1	3	2	4	3	2	3	2	3	2	4	3	2	3	2	2
57	4	Male	1	Married	2	College/University or Above	4	Professional/White Collar Worker	2	PHP 100,000 or more	4	Urban	2	NCR	Yes	1	1	1	2	5	3	5	2	2	1	2	1	4	2	4	1	Disagree	2	1	3	2	3	4	2	3	2	3	2	4	4	2	4	2	2
19	1	Female	2	Single	1	College/University or Above	4	Student	4	PHP 10,000 or less	1	Urban	2	NCR	No	2	2	1	2	5	3	4	2	2	1	2	1	3	2	1	3	Disagree	2	1	3	2	4	4	2	2	1	3	2	4	3	2	2	1	3
24	1	Male	1	Single	1	College/University or Above	4	Professional/White Collar Worker	2	PHP 10,000 to 20,000	2	Urban	2	NCR	Yes	1	2	1	2	3	1	4	2	2	1	3	2	4	2	1	1	Disagree	2	1	1	1	2	1	1	2	1	2	1	2	4	2	4	2	3
22	1	Male	1	Single	1	College/University or Above	4	Student	4	PHP 10,000 or less	1	Urban	2	Region VIII	No	2	2	1	2	3	1	5	2	2	1	2	1	3	2	4	4	Disagree	2	1	4	2	4	4	2	3	2	4	2	4	3	2	3	2	3
29	1	Male	1	Single	1	College/University or Above	4	Professional/White Collar Worker	2	PHP 20,000 to 100,000	3	Urban	2	Region I	No	2	2	1	2	4	2	4	2	2	1	2	1	3	2	4	1	Disagree	2	1	3	2	3	4	2	3	2	3	2	3	3	2	3	2	3
20	1	Male	1	Single	1	College/University or Above	4	Student	4	PHP 10,000 or less	1	Urban	2	NCR	No	2	2	1	2	4	2	5	2	2	1	2	1	3	2	1	2	Agree	3	2	4	2	4	4	2	4	2	4	2	4	3	2	3	2	3
73	5	Male	1	Single	1	College/University or Above	4	Self-employed	3	PHP 100,000 or more	4	Urban	2	NCR	No	2	2	1	1	4	2	4	2	1	1	1	1	3	2	1	3	Agree	3	2	3	2	4	4	2	4	2	4	2	4	3	2	3	2	3
44	3	Female	2	Single	1	College/University or Above	4	Professional/White Collar Worker	2	PHP 20,000 to 100,000	3	Urban	2	Region IV-A	No	2	2	1	2	5	3	3	1	2	1	2	1	2	1	1	3	Disagree	2	1	3	2	3	3	2	2	1	3	2	3	3	2	3	2	4
37	2	Male	1	Single	1	College/University or Above	4	Self-employed	3	PHP 20,000 to 100,000	3	Urban	2	NCR	No	2	2	1	1	4	2	5	2	4	2	3	2	2	1	2	4	Disagree	2	1	3	2	3	3	2	3	2	3	2	4	3	2	3	2	2
20	1	Female	2	Single	1	College/University or Above	4	Student	4	PHP 10,000 or less	1	Urban	2	Region IV-A	No	2	2	1	2	4	2	4	2	2	1	2	1	2	1	1	4	Strongly Agree	4	2	4	2	4	4	2	4	2	4	2	4	2	1	2	1	3
21	1	Female	2	Single	1	College/University or Above	4	Student	4	PHP 10,000 or less	1	Urban	2	NCR	Yes	1	2	2	2	4	2	5	2	1	1	1	1	3	2	4	4	Strongly Agree	4	2	4	2	4	4	2	3	2	4	2	4	3	2	3	2	3
25	1	Male	1	Single	1	College/University or Above	4	Self-employed	3	PHP 20,000 to 100,000	3	Urban	2	Region IV-B	No	2	2	1	2	5	3	5	2	1	1	2	1	4	2	1	4	Strongly Disagree	1	1	3	2	3	3	2	3	2	3	2	3	4	2	4	2	2
65	5	Female	2	Married	2	College/University or Above	4	Housewife/Retired/Unemployed/Other	5	PHP 20,000 to 100,000	3	Urban	2	NCR	Yes	1	2	2	2	4	2	4	2	2	1	2	1	4	2	1	1	Disagree	2	1	2	1	2	4	2	3	2	4	2	2	3	2	3	2	3
60	4	Male	1	Married	2	College/University or Above	4	Professional/White Collar Worker	2	PHP 100,000 or more	4	Urban	2	NCR	No	2	2	2	1	5	3	2	1	2	1	2	1	3	2	4	1	Strongly Disagree	1	1	1	1	1	3	2	1	1	1	1	1	2	1	2	1	2
19	1	Female	2	Single	1	College/University or Above	4	Student	4	PHP 10,000 to 20,000	2	Urban	2	Region I	No	2	2	1	2	3	1	3	1	1	1	1	1	4	2	4	4	Disagree	2	1	4	2	4	4	2	3	2	4	2	4	4	2	4	2	3
28	1	Female	2	Single	1	College/University or Above	4	Housewife/Retired/Unemployed/Other	5	PHP 10,000 or less	1	Urban	2	Region VII	No	2	2	1	2	4	2	4	2	2	1	3	2	3	2	4	2	Strongly Disagree	1	1	4	2	4	4	2	3	2	4	2	4	3	2	3	2	4
59	4	Male	1	Married	2	College/University or Above	4	Professional/White Collar Worker	2	PHP 20,000 to 100,000	3	Urban	2	NCR	Yes	1	2	2	1	4	2	5	2	2	1	2	1	3	2	4	1	Disagree	2	1	2	1	2	2	1	2	1	2	1	2	3	2	3	2	2
32	2	Male	1	Single	1	College/University or Above	4	Professional/White Collar Worker	2	PHP 20,000 to 100,000	3	Rural	1	Region IV-A	No	2	2	1	1	4	2	5	2	2	1	2	1	3	2	4	3	Agree	3	2	3	2	3	4	2	4	2	4	2	4	3	2	3	2	3
19	1	Female	2	Single	1	College/University or Above	4	Student	4	PHP 10,000 or less	1	Urban	2	NCR	No	2	2	2	2	5	3	5	2	1	1	3	2	3	2	4	4	Strongly Disagree	1	1	3	2	4	4	2	3	2	4	2	4	4	2	4	2	3
23	1	Female	2	Single	1	College/University or Above	4	Professional/White Collar Worker	2	PHP 20,000 to 100,000	3	Urban	2	NCR	Yes	1	2	1	2	4	2	5	2	1	1	2	1	3	2	1	4	Strongly Agree	4	2	4	2	4	4	2	4	2	4	2	4	4	2	4	2	3
20	1	Male	1	Single	1	College/University or Above	4	Student	4	PHP 10,000 or less	1	Urban	2	NCR	No	2	2	2	2	4	2	5	2	3	2	2	1	4	2	1	4	Agree	3	2	3	2	3	4	2	3	2	3	2	3	2	1	4	2	2
22	1	Male	1	Single	1	College/University or Above	4	Professional/White Collar Worker	2	PHP 20,000 to 100,000	3	Urban	2	NCR	No	2	2	1	2	4	2	4	2	1	1	1	1	4	2	4	3	Agree	3	2	3	2	3	3	2	3	2	2	1	3	4	2	4	2	2
22	1	Male	1	Single	1	College/University or Above	4	Student	4	PHP 20,000 to 100,000	3	Rural	1	Region IV-A	No	2	2	1	2	4	2	4	2	1	1	1	1	4	2	1	2	Disagree	2	1	4	2	4	4	2	3	2	4	2	4	4	2	4	2	2
49	3	Male	1	Single	1	College/University or Above	4	Professional/White Collar Worker	2	PHP 10,000 to 20,000	2	Rural	1	Region VI	No	2	2	1	2	4	2	2	1	1	1	2	1	3	2	4	1	Disagree	2	1	3	2	4	3	2	3	2	4	2	4	2	1	2	1	3
32	2	Female	2	Single	1	College/University or Above	4	Professional/White Collar Worker	2	PHP 20,000 to 100,000	3	Rural	1	Region IV-A	No	2	2	1	1	4	2	4	2	3	2	2	1	3	2	1	3	Strongly Agree	4	2	4	2	4	4	2	4	2	4	2	4	3	2	2	1	3
69	5	Male	1	Married	2	College/University or Above	4	Self-employed	3	PHP 100,000 or more	4	Urban	2	NCR	No	2	2	1	2	3	1	4	2	2	1	2	1	3	2	4	1	Disagree	2	1	4	2	4	4	2	3	2	4	2	3	3	2	3	2	3
57	4	Female	2	Married	2	College/University or Above	4	Housewife/Retired/Unemployed/Other	5	PHP 20,000 to 100,000	3	Urban	2	Region VII	No	2	2	1	1	4	2	3	1	1	1	3	2	3	2	4	3	Disagree	2	1	2	1	2	3	2	2	1	2	1	2	2	1	2	1	3
37	2	Male	1	Married	2	College/University or Above	4	Professional/White Collar Worker	2	PHP 20,000 to 100,000	3	Urban	2	NCR	Yes	1	2	1	2	4	2	4	2	2	1	3	2	2	1	1	1	Agree	3	2	2	1	2	3	2	2	1	3	2	3	3	2	2	1	3
38	2	Male	1	Married	2	College/University or Above	4	Professional/White Collar Worker	2	PHP 10,000 to 20,000	2	Rural	1	Region VI	No	2	2	1	1	4	2	4	2	2	1	2	1	3	2	4	3	Disagree	2	1	3	2	3	4	2	3	2	3	2	3	3	2	2	1	3
30	1	Female	2	Married	2	College/University or Above	4	Housewife/Retired/Unemployed/Other	5	PHP 10,000 to 20,000	2	Rural	1	Region IV-A	No	2	2	2	1	4	2	4	2	1	1	3	2	3	2	4	1	Disagree	2	1	4	2	4	4	2	4	2	4	2	4	3	2	3	2	3
53	4	Female	2	Married	2	College/University or Above	4	Professional/White Collar Worker	2	PHP 100,000 or more	4	Urban	2	NCR	Yes	1	1	1	2	5	3	4	2	2	1	1	1	3	2	4	2	Agree	3	2	3	2	3	4	2	3	2	4	2	4	3	2	3	2	4
20	1	Female	2	Single	1	College/University or Above	4	Student	4	PHP 10,000 or less	1	Urban	2	NCR	No	2	2	1	2	5	3	5	2	1	1	1	1	3	2	4	3	Agree	3	2	3	2	4	3	2	3	2	3	2	4	4	2	3	2	2
19	1	Male	1	Single	1	College/University or Above	4	Student	4	PHP 10,000 or less	1	Rural	1	Region IV-A	No	2	2	1	2	4	2	1	1	1	1	1	1	1	1	1	1	Strongly Disagree	1	1	1	1	1	2	1	3	2	1	1	3	1	1	1	1	4
22	1	Male	1	Single	1	College/University or Above	4	Student	4	PHP 20,000 to 100,000	3	Urban	2	NCR	Yes	1	2	1	2	4	2	3	1	1	1	2	1	2	1	1	3	Strongly Disagree	1	1	3	2	4	4	2	4	2	3	2	4	1	1	2	1	4
39	2	Female	2	Married	2	College/University or Above	4	Blue Collar Worker	1	PHP 20,000 to 100,000	3	Urban	2	NCR	Yes	1	2	1	2	4	2	3	1	1	1	3	2	3	2	4	3	Agree	3	2	4	2	4	4	2	3	2	4	2	4	2	1	2	1	4
59	4	Female	2	Single	1	College/University or Above	4	Professional/White Collar Worker	2	PHP 100,000 or more	4	Urban	2	NCR	No	2	2	1	2	3	1	5	2	1	1	2	1	3	2	4	3	Disagree	2	1	4	2	4	4	2	3	2	4	2	4	3	2	2	1	3
19	1	Male	1	Single	1	College/University or Above	4	Student	4	PHP 20,000 to 100,000	3	Urban	2	NCR	No	2	2	1	2	4	2	2	1	1	1	2	1	3	2	1	3	Disagree	2	1	3	2	4	4	2	4	2	3	2	4	3	2	2	1	3
24	1	Male	1	Single	1	College/University or Above	4	Self-employed	3	PHP 10,000 to 20,000	2	Urban	2	NCR	No	2	2	1	2	3	1	2	1	2	1	2	1	3	2	1	3	Agree	3	2	4	2	4	4	2	3	2	3	2	4	2	1	3	2	3
52	4	Female	2	Married	2	College/University or Above	4	Professional/White Collar Worker	2	PHP 20,000 to 100,000	3	Urban	2	Region IV-A	No	2	2	1	2	4	2	5	2	2	1	2	1	4	2	4	1	Agree	3	2	4	2	4	4	2	4	2	4	2	4	2	1	4	2	4
46	3	Female	2	Married	2	College/University or Above	4	Professional/White Collar Worker	2	PHP 100,000 or more	4	Urban	2	Region X	No	2	2	1	2	5	3	5	2	3	2	3	2	3	2	1	3	Agree	3	2	3	2	4	4	2	3	2	4	2	4	2	1	4	2	3
19	1	Female	2	Single	1	College/University or Above	4	Student	4	PHP 10,000 or less	1	Urban	2	NCR	No	2	2	1	2	3	1	5	2	2	1	4	2	4	2	1	3	Disagree	2	1	3	2	3	4	2	2	1	2	1	3	3	2	3	2	3
57	4	Female	2	Married	2	College/University or Above	4	Housewife/Retired/Unemployed/Other	5	PHP 10,000 or less	1	Urban	2	Region IV-A	No	2	2	1	1	2	1	2	1	1	1	2	1	2	1	1	1	Strongly Disagree	1	1	1	1	2	4	2	2	1	3	2	3	3	2	3	2	4
62	5	Female	2	Married	2	College/University or Above	4	Housewife/Retired/Unemployed/Other	5	PHP 10,000 or less	1	Rural	1	Region IV-A	No	2	2	1	1	3	1	4	2	1	1	1	1	3	2	4	2	Disagree	2	1	3	2	4	4	2	4	2	4	2	4	3	2	3	2	4
25	1	Female	2	Single	1	College/University or Above	4	Professional/White Collar Worker	2	PHP 20,000 to 100,000	3	Urban	2	NCR	No	2	2	1	2	3	1	3	1	1	1	2	1	3	2	4	1	Disagree	2	1	3	2	4	3	2	4	2	3	2	4	4	2	4	2	4
38	2	Male	1	Single	1	College/University or Above	4	Professional/White Collar Worker	2	PHP 10,000 to 20,000	2	Rural	1	Region III	No	2	2	1	1	4	2	5	2	1	1	3	2	4	2	1	1	Disagree	2	1	3	2	4	3	2	3	2	3	2	3	3	2	3	2	3
19	1	Female	2	Single	1	College/University or Above	4	Student	4	PHP 10,000 or less	1	Urban	2	Region III	No	2	2	1	2	4	2	5	2	2	1	2	1	4	2	1	2	Disagree	2	1	4	2	4	4	2	4	2	4	2	4	4	2	4	2	3
61	5	Male	1	Married	2	College/University or Above	4	Housewife/Retired/Unemployed/Other	5	PHP 20,000 to 100,000	3	Urban	2	NCR	No	2	2	1	2	4	2	3	1	2	1	2	1	3	2	1	1	Disagree	2	1	3	2	3	3	2	3	2	3	2	3	3	2	3	2	3
47	3	Female	2	Single	1	College/University or Above	4	Self-employed	3	PHP 100,000 or more	4	Urban	2	NCR	No	2	2	1	2	4	2	4	2	1	1	3	2	3	2	4	1	Disagree	2	1	3	2	3	4	2	3	2	3	2	3	3	2	3	2	3
25	1	Male	1	Single	1	College/University or Above	4	Student	4	PHP 10,000 or less	1	Urban	2	NCR	No	2	2	2	2	4	2	5	2	1	1	2	1	4	2	4	1	Disagree	2	1	3	2	4	4	2	4	2	4	2	4	4	2	4	2	4
37	2	Female	2	Single	1	College/University or Above	4	Professional/White Collar Worker	2	PHP 20,000 to 100,000	3	Urban	2	NCR	Yes	1	2	1	2	5	3	3	1	2	1	3	2	3	2	4	1	Disagree	2	1	4	2	4	4	2	4	2	4	2	4	3	2	3	2	4
69	5	Female	2	Married	2	College/University or Above	4	Self-employed	3	PHP 20,000 to 100,000	3	Urban	2	NCR	Yes	1	1	1	1	3	1	2	1	1	1	1	1	2	1	1	1	Agree	3	2	3	2	3	4	2	4	2	4	2	3	3	2	3	2	4
48	3	Female	2	Married	2	College/University or Above	4	Professional/White Collar Worker	2	PHP 20,000 to 100,000	3	Urban	2	NCR	Yes	1	2	1	1	3	1	4	2	2	1	2	1	3	2	4	1	Agree	3	2	3	2	3	3	2	4	2	3	2	3	3	2	3	2	3
24	1	Female	2	Single	1	College/University or Above	4	Professional/White Collar Worker	2	PHP 10,000 to 20,000	2	Urban	2	NCR	No	2	2	2	2	3	1	4	2	2	1	2	1	3	2	1	3	Agree	3	2	4	2	4	3	2	3	2	3	2	4	3	2	3	2	3
47	3	Male	1	Married	2	College/University or Above	4	Self-employed	3	PHP 20,000 to 100,000	3	Urban	2	Region VII	No	2	2	1	1	4	2	4	2	2	1	2	1	3	2	4	2	Agree	3	2	3	2	3	4	2	3	2	4	2	4	4	2	4	2	4
26	1	Male	1	Single	1	College/University or Above	4	Student	4	PHP 10,000 or less	1	Urban	2	NCR	Yes	1	2	1	2	4	2	5	2	2	1	2	1	3	2	4	1	Agree	3	2	3	2	4	4	2	3	2	4	2	4	4	2	4	2	3
20	1	Male	1	Single	1	College/University or Above	4	Student	4	PHP 10,000 or less	1	Rural	1	Region III	No	2	2	1	2	5	3	4	2	3	2	4	2	4	2	1	5	Strongly Agree	4	2	4	2	4	4	2	3	2	4	2	4	4	2	3	2	4
23	1	Male	1	Single	1	College/University or Above	4	Student	4	PHP 10,000 or less	1	Urban	2	NCR	No	2	2	1	2	4	2	4	2	1	1	2	1	3	2	4	4	Agree	3	2	3	2	4	3	2	2	1	3	2	3	3	2	3	2	4
28	1	Male	1	Single	1	College/University or Above	4	Professional/White Collar Worker	2	PHP 20,000 to 100,000	3	Rural	1	Region VI	No	2	2	1	1	4	2	5	2	2	1	2	1	3	2	4	1	Agree	3	2	2	1	3	3	2	2	1	2	1	3	3	2	3	2	2
52	4	Male	1	Married	2	College/University or Above	4	Professional/White Collar Worker	2	PHP 100,000 or more	4	Urban	2	NCR	No	2	2	1	2	4	2	4	2	1	1	1	1	3	2	4	1	Disagree	2	1	3	2	3	4	2	2	1	3	2	4	4	2	3	2	2
19	1	Male	1	Single	1	College/University or Above	4	Student	4	PHP 100,000 or more	4	Urban	2	NCR	Yes	1	2	1	2	4	2	4	2	1	1	1	1	4	2	4	4	Disagree	2	1	3	2	4	3	2	3	2	4	2	4	4	2	4	2	2
46	3	Male	1	Single	1	College/University or Above	4	Self-employed	3	PHP 100,000 or more	4	Urban	2	Region VII	No	2	2	1	2	5	3	5	2	1	1	1	1	4	2	4	2	Disagree	2	1	3	2	3	3	2	3	2	4	2	4	4	2	4	2	3
19	1	Male	1	Single	1	College/University or Above	4	Student	4	PHP 10,000 or less	1	Urban	2	NCR	Yes	1	2	2	2	3	1	4	2	3	2	3	2	4	2	1	3	Disagree	2	1	4	2	4	4	2	3	2	4	2	4	4	2	4	2	2
35	2	Female	2	Married	2	College/University or Above	4	Housewife/Retired/Unemployed/Other	5	PHP 20,000 to 100,000	3	Urban	2	NCR	No	2	2	2	2	4	2	4	2	3	2	3	2	3	2	1	1	Disagree	2	1	3	2	3	3	2	3	2	4	2	4	3	2	3	2	2
50	3	Female	2	Married	2	College/University or Above	4	Professional/White Collar Worker	2	PHP 100,000 or more	4	Urban	2	Region VI	No	2	2	1	1	4	2	2	1	2	1	2	1	2	1	1	2	Disagree	2	1	3	2	2	2	1	2	1	1	1	2	2	1	2	1	3
20	1	Female	2	Single	1	College/University or Above	4	Student	4	PHP 10,000 or less	1	Urban	2	NCR	No	2	2	1	2	5	3	5	2	2	1	3	2	4	2	4	3	Strongly Disagree	1	1	3	2	3	3	2	2	1	3	2	3	4	2	4	2	3
20	1	Male	1	Single	1	College/University or Above	4	Student	4	PHP 10,000 or less	1	Rural	1	Region III	No	2	2	1	2	3	1	5	2	1	1	2	1	3	2	1	3	Strongly Disagree	1	1	4	2	4	4	2	3	2	4	2	4	4	2	4	2	4
71	5	Female	2	Married	2	College/University or Above	4	Self-employed	3	PHP 20,000 to 100,000	3	Urban	2	Region IV-A	No	2	2	2	1	4	2	4	2	1	1	2	1	3	2	4	2	Strongly Disagree	1	1	2	1	2	3	2	2	1	3	2	3	3	2	3	2	2
26	1	Male	1	Single	1	College/University or Above	4	Professional/White Collar Worker	2	PHP 20,000 to 100,000	3	Urban	2	NCR	No	2	2	2	2	4	2	4	2	2	1	3	2	3	2	4	2	Agree	3	2	2	1	2	4	2	3	2	4	2	4	4	2	4	2	2
20	1	Female	2	Single	1	College/University or Above	4	Student	4	PHP 10,000 or less	1	Urban	2	NCR	No	2	2	1	2	5	3	4	2	1	1	2	1	4	2	4	4	Disagree	2	1	4	2	4	4	2	3	2	4	2	4	4	2	4	2	2
68	5	Male	1	Married	2	College/University or Above	4	Professional/White Collar Worker	2	PHP 100,000 or more	4	Urban	2	NCR	Yes	1	2	1	1	4	2	5	2	2	1	2	1	3	2	4	1	Disagree	2	1	3	2	3	3	2	3	2	3	2	3	3	2	3	2	3
22	1	Female	2	Single	1	College/University or Above	4	Professional/White Collar Worker	2	PHP 10,000 to 20,000	2	Urban	2	Region VII	No	2	2	1	2	5	3	3	1	1	1	3	2	3	2	1	1	Strongly Disagree	1	1	2	1	1	3	2	1	1	1	1	1	3	2	2	1	3
24	1	Male	1	Single	1	College/University or Above	4	Student	4	PHP 10,000 or less	1	Rural	1	Region IV-A	No	2	2	1	2	4	2	3	1	1	1	1	1	3	2	4	2	Strongly Agree	4	2	3	2	3	4	2	2	1	2	1	3	4	2	2	1	1
19	1	Male	1	Single	1	College/University or Above	4	Student	4	PHP 10,000 or less	1	Rural	1	Region IV-A	No	2	2	2	2	4	2	3	1	1	1	3	2	4	2	1	4	Agree	3	2	3	2	3	4	2	3	2	1	1	4	4	2	4	2	2
28	1	Male	1	Single	1	College/University or Above	4	Professional/White Collar Worker	2	PHP 20,000 to 100,000	3	Urban	2	NCR	No	2	2	1	2	4	2	5	2	1	1	2	1	4	2	4	5	Strongly Disagree	1	1	1	1	1	4	2	4	2	4	2	4	4	2	4	2	1
18	1	Male	1	Single	1	College/University or Above	4	Student	4	PHP 10,000 or less	1	Rural	1	Region IV-A	No	2	2	2	2	5	3	5	2	1	1	4	2	4	2	3	1	Strongly Disagree	1	1	3	2	4	3	2	3	2	3	2	4	4	2	4	2	1
24	1	Male	1	Single	1	College/University or Above	4	Student	4	PHP 20,000 to 100,000	3	Rural	1	Region I	No	2	2	1	2	4	2	5	2	1	1	3	2	3	2	4	3	Disagree	2	1	3	2	4	3	2	3	2	4	2	4	2	1	2	1	3
31	2	Male	1	Married	2	College/University or Above	4	Professional/White Collar Worker	2	PHP 10,000 to 20,000	2	Urban	2	NCR	No	2	1	1	1	5	3	4	2	2	1	2	1	3	2	1	3	Strongly Disagree	1	1	1	1	3	4	2	1	1	1	1	3	3	2	3	2	4
73	5	Female	2	Married	2	College/University or Above	4	Professional/White Collar Worker	2	PHP 10,000 to 20,000	2	Urban	2	NCR	No	2	1	2	1	4	2	5	2	1	1	1	1	4	2	4	1	Disagree	2	1	3	2	3	3	2	2	1	2	1	3	3	2	3	2	3
57	4	Male	1	Married	2	College/University or Above	4	Professional/White Collar Worker	2	PHP 20,000 to 100,000	3	Urban	2	NCR	No	2	2	1	2	4	2	3	1	2	1	3	2	3	2	4	3	Disagree	2	1	3	2	3	3	2	2	1	1	1	3	3	2	3	2	3
20	1	Male	1	Single	1	College/University or Above	4	Student	4	PHP 100,000 or more	4	Urban	2	Region IV-A	No	2	2	1	2	3	1	5	2	2	1	3	2	3	2	1	3	Agree	3	2	3	2	4	3	2	3	2	2	1	4	4	2	4	2	3
20	1	Male	1	Single	1	College/University or Above	4	Student	4	PHP 10,000 or less	1	Rural	1	Region III	No	2	1	1	2	3	1	4	2	2	1	2	1	3	2	4	2	Disagree	2	1	2	1	3	3	2	2	1	3	2	3	3	2	4	2	3
20	1	Male	1	Single	1	College/University or Above	4	Student	4	PHP 10,000 or less	1	Urban	2	NCR	No	2	2	1	1	4	2	5	2	2	1	3	2	3	2	1	4	Disagree	2	1	3	2	3	3	2	2	1	3	2	3	3	2	3	2	4
19	1	Female	2	Single	1	College/University or Above	4	Student	4	PHP 10,000 or less	1	Urban	2	Region IV-A	No	2	2	1	2	4	2	4	2	2	1	2	1	2	1	1	4	Disagree	2	1	4	2	4	4	2	2	1	4	2	4	4	2	4	2	4
19	1	Female	2	Single	1	College/University or Above	4	Student	4	PHP 10,000 or less	1	Urban	2	NCR	No	2	2	1	2	5	3	5	2	3	2	4	2	4	2	1	3	Disagree	2	1	2	1	4	4	2	4	2	4	2	4	4	2	4	2	4
25	1	Male	1	Married	2	College/University or Above	4	Professional/White Collar Worker	2	PHP 20,000 to 100,000	3	Rural	1	Region VII	No	2	2	2	2	5	3	3	1	2	1	3	2	3	2	4	1	Disagree	2	1	2	1	3	3	2	3	2	3	2	4	4	2	3	2	4
55	4	Female	2	Married	2	College/University or Above	4	Professional/White Collar Worker	2	PHP 20,000 to 100,000	3	Urban	2	NCR	No	2	2	1	1	3	1	4	2	2	1	3	2	4	2	4	1	Disagree	2	1	3	2	3	4	2	3	2	4	2	4	3	2	3	2	4
62	5	Female	2	Married	2	College/University or Above	4	Professional/White Collar Worker	2	PHP 100,000 or more	4	Urban	2	NCR	Yes	1	2	1	1	3	1	4	2	2	1	2	1	3	2	1	3	Disagree	2	1	3	2	4	4	2	3	2	4	2	4	3	2	3	2	3
19	1	Female	2	Single	1	College/University or Above	4	Student	4	PHP 10,000 or less	1	Urban	2	NCR	No	2	2	1	2	3	1	2	1	1	1	1	1	3	2	4	3	Disagree	2	1	4	2	4	4	2	3	2	4	2	4	3	2	4	2	3
20	1	Female	2	Single	1	College/University or Above	4	Student	4	PHP 10,000 or less	1	Urban	2	NCR	Yes	1	2	2	2	3	1	4	2	2	1	3	2	3	2	1	3	Disagree	2	1	3	2	3	3	2	3	2	3	2	3	3	2	3	2	3
21	1	Female	2	Single	1	College/University or Above	4	Student	4	PHP 10,000 or less	1	Urban	2	Region XI	No	2	2	2	2	3	1	5	2	2	1	3	2	3	2	1	3	Disagree	2	1	3	2	3	3	2	3	2	3	2	4	3	2	3	2	3
68	5	Female	2	Married	2	College/University or Above	4	Housewife/Retired/Unemployed/Other	5	PHP 20,000 to 100,000	3	Urban	2	Region XI	No	2	1	1	1	4	2	5	2	1	1	2	1	4	2	4	2	Disagree	2	1	4	2	4	4	2	4	2	4	2	4	4	2	4	2	3
21	1	Male	1	Single	1	College/University or Above	4	Student	4	PHP 10,000 or less	1	Rural	1	Region III	No	2	2	1	2	4	2	3	1	2	1	3	2	3	2	4	2	Disagree	2	1	3	2	4	4	2	4	2	4	2	4	3	2	3	2	3
19	1	Male	1	Single	1	College/University or Above	4	Student	4	PHP 10,000 or less	1	Urban	2	NCR	No	2	2	1	2	4	2	4	2	1	1	2	1	3	2	4	3	Disagree	2	1	3	2	4	4	2	3	2	3	2	3	3	2	3	2	3
22	1	Female	2	Single	1	College/University or Above	4	Professional/White Collar Worker	2	PHP 10,000 to 20,000	2	Urban	2	NCR	No	2	2	1	2	4	2	5	2	2	1	2	1	3	2	4	3	Strongly Disagree	1	1	3	2	4	4	2	4	2	4	2	4	4	2	4	2	3
65	5	Female	2	Married	2	College/University or Above	4	Professional/White Collar Worker	2	PHP 20,000 to 100,000	3	Rural	1	Region III	No	2	2	2	2	4	2	5	2	2	1	2	1	3	2	1	3	Strongly Disagree	1	1	3	2	3	4	2	3	2	4	2	4	3	2	3	2	3
63	5	Female	2	Single	1	College/University or Above	4	Professional/White Collar Worker	2	PHP 20,000 to 100,000	3	Urban	2	Region VI	No	2	2	2	1	5	3	4	2	1	1	2	1	3	2	4	2	Disagree	2	1	3	2	3	3	2	3	2	4	2	3	3	2	3	2	3
18	1	Male	1	Single	1	College/University or Above	4	Student	4	PHP 10,000 or less	1	Rural	1	Region III	No	2	2	1	2	5	3	3	1	2	1	2	1	4	2	4	4	Disagree	2	1	3	2	3	4	2	3	2	3	2	3	4	2	4	2	3
19	1	Female	2	Single	1	College/University or Above	4	Student	4	PHP 10,000 or less	1	Urban	2	NCR	No	2	2	1	2	5	3	4	2	1	1	3	2	4	2	4	4	Disagree	2	1	3	2	4	3	2	3	2	4	2	4	3	2	3	2	3
20	1	Female	2	Single	1	College/University or Above	4	Student	4	PHP 10,000 or less	1	Urban	2	NCR	No	2	2	1	2	5	3	4	2	1	1	2	1	4	2	4	3	Disagree	2	1	3	2	4	4	2	3	2	4	2	4	3	2	4	2	3
21	1	Female	2	Single	1	College/University or Above	4	Student	4	PHP 10,000 or less	1	Urban	2	Region IV-A	No	2	2	1	2	5	3	4	2	2	1	2	1	3	2	1	3	Disagree	2	1	4	2	4	4	2	3	2	4	2	4	4	2	4	2	4
67	5	Male	1	Married	2	College/University or Above	4	Professional/White Collar Worker	2	PHP 100,000 or more	4	Urban	2	Region III	No	2	2	1	2	4	2	3	1	1	1	2	1	3	2	4	1	Agree	3	2	3	2	3	3	2	3	2	3	2	3	3	2	3	2	3
20	1	Male	1	Single	1	College/University or Above	4	Student	4	PHP 10,000 or less	1	Urban	2	NCR	No	2	2	2	2	4	2	4	2	1	1	1	1	3	2	1	4	Strongly Disagree	1	1	3	2	4	4	2	4	2	4	2	4	4	2	4	2	1
55	4	Female	2	Married	2	College/University or Above	4	Professional/White Collar Worker	2	PHP 100,000 or more	4	Urban	2	NCR	Yes	1	2	1	2	4	2	4	2	2	1	2	1	3	2	4	2	Disagree	2	1	2	1	2	3	2	3	2	3	2	4	3	2	3	2	2
58	4	Male	1	Married	2	College/University or Above	4	Professional/White Collar Worker	2	PHP 100,000 or more	4	Urban	2	NCR	Yes	1	2	1	2	4	2	5	2	1	1	2	1	3	2	4	2	Disagree	2	1	3	2	4	4	2	3	2	4	2	4	4	2	4	2	4
61	5	Male	1	Married	2	College/University or Above	4	Professional/White Collar Worker	2	PHP 100,000 or more	4	Urban	2	NCR	No	2	2	1	2	4	2	4	2	2	1	2	1	3	2	4	2	Disagree	2	1	3	2	3	3	2	3	2	3	2	2	3	2	3	2	3
21	1	Female	2	Single	1	College/University or Above	4	Student	4	PHP 10,000 or less	1	Urban	2	NCR	No	2	1	1	2	4	2	5	2	1	1	2	1	3	2	1	2	Agree	3	2	3	2	4	3	2	2	1	4	2	4	4	2	4	2	3
21	1	Female	2	Single	1	College/University or Above	4	Student	4	PHP 10,000 or less	1	Urban	2	NCR	Yes	1	2	1	2	5	3	3	1	1	1	3	2	4	2	4	3	Agree	3	2	4	2	3	4	2	2	1	4	2	3	4	2	4	2	3
22	1	Female	2	Single	1	College/University or Above	4	Student	4	PHP 10,000 or less	1	Urban	2	NCR	Yes	1	2	2	2	5	3	4	2	1	1	3	2	4	2	4	3	Disagree	2	1	4	2	4	4	2	4	2	4	2	4	3	2	3	2	4
23	1	Male	1	Single	1	College/University or Above	4	Professional/White Collar Worker	2	PHP 10,000 to 20,000	2	Urban	2	Region IV-A	No	2	2	1	2	5	3	4	2	1	1	1	1	3	2	4	4	Agree	3	2	4	2	4	4	2	3	2	4	2	4	3	2	3	2	3
40	2	Male	1	Married	2	College/University or Above	4	Professional/White Collar Worker	2	PHP 20,000 to 100,000	3	Urban	2	Region IX	No	2	2	1	2	5	3	5	2	4	2	4	2	4	2	1	4	Disagree	2	1	3	2	3	3	2	2	1	3	2	3	4	2	4	2	3
63	5	Female	2	Single	1	College/University or Above	4	Housewife/Retired/Unemployed/Other	5	PHP 20,000 to 100,000	3	Urban	2	NCR	No	2	2	1	1	3	1	3	1	1	1	2	1	3	2	4	2	Disagree	2	1	2	1	2	3	2	3	2	3	2	3	3	2	3	2	4
20	1	Male	1	Single	1	College/University or Above	4	Student	4	PHP 10,000 or less	1	Rural	1	Region III	No	2	2	2	2	4	2	3	1	2	1	3	2	3	2	1	5	Strongly Disagree	1	1	1	1	3	2	1	3	2	1	1	3	4	2	2	1	4
20	1	Male	1	Single	1	College/University or Above	4	Student	4	PHP 20,000 to 100,000	3	Rural	1	Region IV-A	No	2	2	1	2	4	2	4	2	1	1	2	1	4	2	4	3	Disagree	2	1	4	2	4	4	2	4	2	4	2	4	3	2	2	1	4
29	1	Female	2	Single	1	College/University or Above	4	Self-employed	3	PHP 10,000 to 20,000	2	Urban	2	Region IV-A	No	2	2	1	2	3	1	4	2	2	1	3	2	3	2	1	1	Agree	3	2	3	2	4	4	2	3	2	3	2	4	2	1	3	2	3
71	5	Female	2	Single	1	College/University or Above	4	Housewife/Retired/Unemployed/Other	5	PHP 20,000 to 100,000	3	Urban	2	Region IV-A	No	2	2	2	2	4	2	3	1	1	1	1	1	3	2	4	2	Disagree	2	1	3	2	3	3	2	2	1	2	1	3	3	2	3	2	3
[truncated: 5,194 more rows]
[truncated: 23 more columns]
